# Supplementary material for: Maoeriocalysins A–D, four novelent-kaurane diterpenoids fromIsodon eriocalyxand their structure determination utilizing quantum chemical calculation in conjunction with quantitative interproton distance analysis
Source: Royal Society of Chemistry journal article supplement (doi:10.1039/c8qo01007b), 2018-11-06
Supplement: c8qo01007b1.pdf [file c8qo01007b1.pdf]

**Supporting Information for**

**Maoericalysins A–D, four novel *ent*-kaurane  
diterpenoids from *Isodon eriocalyx* and their structure  
determination utilizing quantum chemical calculation  
in conjunction with quantitative interproton distances  
analysis**

Qian Yang,<sup>a,b,‡</sup> Kun Hu,<sup>a,‡</sup> Bing-Chao Yan,<sup>a</sup> Miao Liu,<sup>a</sup> Xiao-Nian Li,<sup>a</sup> Han-Dong Sun,<sup>a</sup>  
and Pema-Tenzin Puno<sup>a,\*</sup>

<sup>a</sup> State Key Laboratory of Phytochemistry and Plant Resources in West China,  
Kunming Institute of Botany, Chinese Academy of Sciences, Kunming 650201,  
Yunnan, People's Republic of China.

<sup>b</sup> University of Chinese Academy of Sciences, Beijing 100049, People's Republic of  
China

‡ These authors contributed equally to this work.

Corresponding authors. E-mail: [punopematenzin@mail.kib.ac.cn](mailto:punopematenzin@mail.kib.ac.cn)

# CONTENT

|                                                                                                                     |           |
|---------------------------------------------------------------------------------------------------------------------|-----------|
| <b>1. The structures of several previously reported <i>ent</i>-kaurane diterpenoids from <i>Isodon</i> species.</b> | <b>1</b>  |
| <b>2. Key 2D NMR correlations of 2–4.</b>                                                                           | <b>2</b>  |
| <b>3. X-ray crystallographic analysis of 2.</b>                                                                     | <b>3</b>  |
| <b>4. Results of the calculated <sup>13</sup>C and <sup>1</sup>H chemical shifts of possible candidates.</b>        | <b>5</b>  |
| 4.1 Results of DFT calculated <sup>13</sup> C and <sup>1</sup> H chemical shifts of <b>1</b> .                      | 5         |
| 4.2 Results of DFT calculated <sup>13</sup> C and <sup>1</sup> H chemical shifts of <b>3a</b> and <b>3b</b> .       | 7         |
| 4.3 Results of DFT calculated <sup>13</sup> C and <sup>1</sup> H chemical shifts of <b>4a–4e</b> .                  | 9         |
| <b>5. The DFT calculated key spin-spin coupling constants of 4.</b>                                                 | <b>11</b> |
| <b>6. The quantitative analysis of key interproton distances of 1 and 4.</b>                                        | <b>12</b> |
| <b>7. Computational data of 1, 3 and 4.</b>                                                                         | <b>19</b> |
| 7.1 Computational data — Maoericalysin A ( <b>1</b> ).                                                              | 19        |
| 7.2 Computational data — Maoericalysin C ( <b>3</b> ).                                                              | 25        |
| 7.3 Computational data — Maoericalysin D ( <b>4</b> ).                                                              | 31        |
| <b>8. Results of the biological activity evaluation.</b>                                                            | <b>53</b> |
| 8.1 Acetylcholinesterase/butyrylcholinesterase inhibitory activity                                                  | 53        |
| 8.2 Neurite outgrowth-promoting activity                                                                            | 54        |
| 8.3 Test of platelet aggregation assays.                                                                            | 55        |
| <b>9. HRESIMS, NMR, UV, CD and OR spectra of compounds 1–4.</b>                                                     | <b>58</b> |
| 9.1 HRESIMS, NMR, UV, CD and OR spectra of maoericalysin A ( <b>1</b> ).                                            | 58        |
| 9.2 HRESIMS, NMR, UV, CD and OR spectra of maoericalysin B ( <b>2</b> ).                                            | 76        |
| 9.3 HRESIMS, NMR, UV, CD and OR spectra of maoericalysin C ( <b>3</b> ).                                            | 89        |
| 9.4 HRESIMS, NMR, UV, CD and OR spectra of maoericalysin D ( <b>4</b> ).                                            | 108       |

# 1. The structures of several previously reported *ent*-kaurane diterpenoids from

## *Isodon* species.

**Table S1** Representative *ent*-kaurane diterpenoids previously reported from *Isodon* species that are interesting with aspect to their structures, bioactivities, and organic synthesis.

|                                                                                                                                                                                                     |                                                                                                                                                                                                                      |                                                                                                                                                                                                                            |                                                                                                                                                                                                                                |                                                                                                                                                                                                                                         |
|-----------------------------------------------------------------------------------------------------------------------------------------------------------------------------------------------------|----------------------------------------------------------------------------------------------------------------------------------------------------------------------------------------------------------------------|----------------------------------------------------------------------------------------------------------------------------------------------------------------------------------------------------------------------------|--------------------------------------------------------------------------------------------------------------------------------------------------------------------------------------------------------------------------------|-----------------------------------------------------------------------------------------------------------------------------------------------------------------------------------------------------------------------------------------|
| 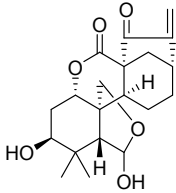 <p><b>enmein</b><br/>Enmein type (1,7-lactone)<br/><i>Acta Crystallogr.</i>, <b>1966</b>, <i>20</i>,<br/>197.</p> |  <p><b>ericalyxin B</b><br/>7,20-epoxy-<i>ent</i>-<br/>kaurane<br/><i>Chem. Pharm. Bull.</i>,<br/><b>1976</b>, <i>24</i>, 2118.</p> |  <p><b>isoforretin A</b><br/>C-20 non-oxygenated <i>ent</i>-<br/>kaurane<br/><i>Cancer Res.</i>, <b>2017</b>, <i>77</i>,<br/>926–936.</p> |  <p><b>maoecrystal V</b><br/>6,7-Seco-6-nor-<br/>15(8→9)-<i>ent</i>-kaurane<br/><i>Org. Lett.</i>, <b>2004</b>, <i>6</i>,<br/>4327–4330.</p> |  <p><b>maoecrystal Z</b><br/>6,7-Seco-8,15-seco-6,8-<br/>cyclo-<i>ent</i>-kaurane<br/><i>Org. Lett.</i>, <b>2006</b>, <i>21</i>, 4727–<br/>4730.</p> |
|-----------------------------------------------------------------------------------------------------------------------------------------------------------------------------------------------------|----------------------------------------------------------------------------------------------------------------------------------------------------------------------------------------------------------------------|----------------------------------------------------------------------------------------------------------------------------------------------------------------------------------------------------------------------------|--------------------------------------------------------------------------------------------------------------------------------------------------------------------------------------------------------------------------------|-----------------------------------------------------------------------------------------------------------------------------------------------------------------------------------------------------------------------------------------|

## 2. Key 2D NMR correlations of 2–4.

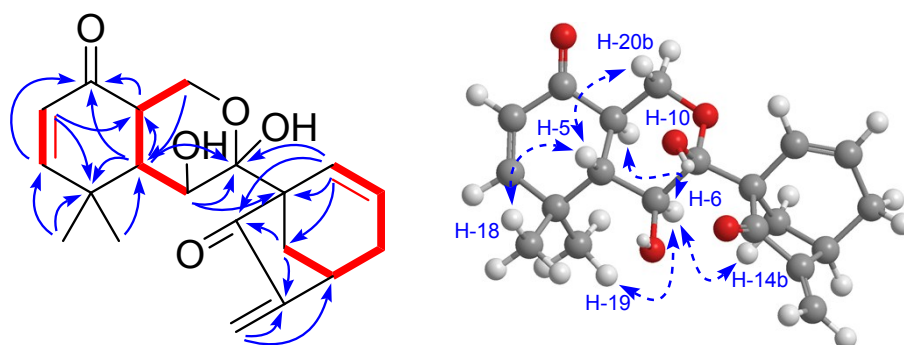

**Figure S1**  $^1\text{H}$ - $^1\text{H}$  COSY (—), key HMBC (H→C), and ROESY correlations of **2**.

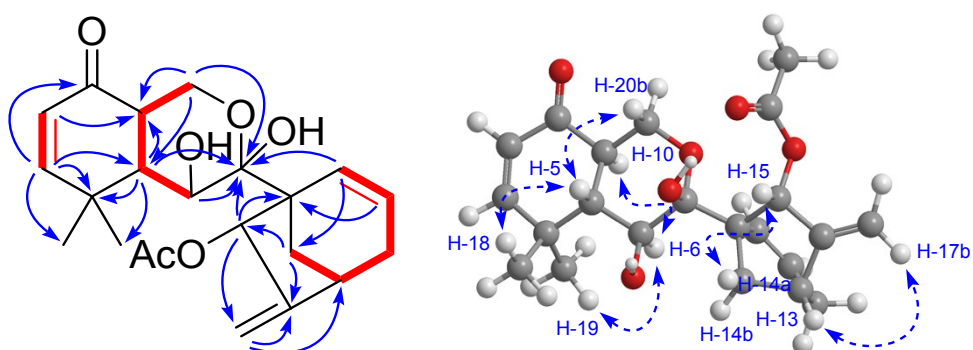

**Figure S2**  $^1\text{H}$ - $^1\text{H}$  COSY (—), key HMBC (H→C), and ROESY correlations of **3**.

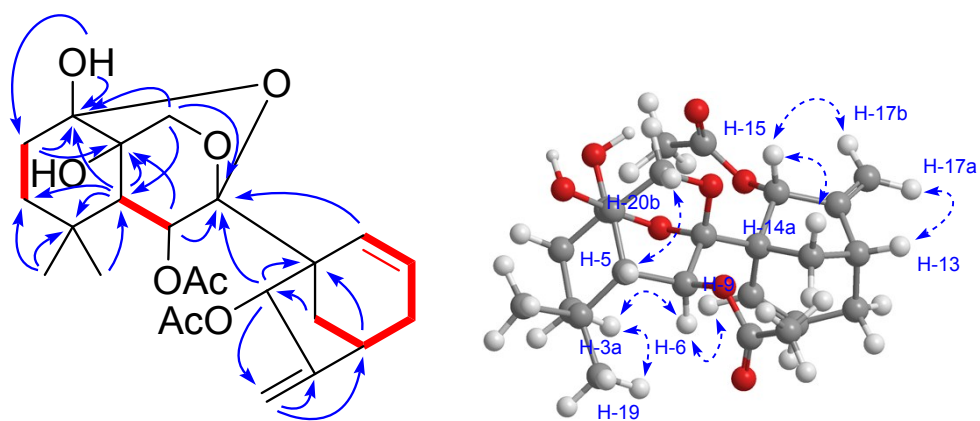

**Figure S3**  $^1\text{H}$ - $^1\text{H}$  COSY (—), key HMBC (H→C), and ROESY correlations of **4**.

### 3. X-ray crystallographic analysis of **2**.

Crystal Data for maoericalysin B (**2**). Crystal data for **2**\_0m: C<sub>20</sub>H<sub>24</sub>O<sub>5</sub>, *M* = 344.39, *a* = 6.1036(4) Å, *b* = 12.5506(7) Å, *c* = 21.9760(13) Å,  $\alpha = 90^\circ$ ,  $\beta = 90^\circ$ ,  $\gamma = 90^\circ$ , *V* = 1683.45(18) Å<sup>3</sup>, *T* = 100(2) K, space group *P*212121, *Z* = 4,  $\mu(\text{CuK}\alpha) = 0.792 \text{ mm}^{-1}$ , 18010 reflections measured, 3157 independent reflections (*R*<sub>int</sub> = 0.0539). The final *R*<sub>1</sub> values were 0.0353 (*I* > 2σ(*I*)). The final *wR*(*F*<sup>2</sup>) values were 0.0939 (*I* > 2σ(*I*)). The final *R*<sub>1</sub> values were 0.0356 (all data). The final *wR*(*F*<sup>2</sup>) values were 0.0942 (all data). The goodness of fit on *F*<sup>2</sup> was 1.072. Flack parameter = 0.07(5).

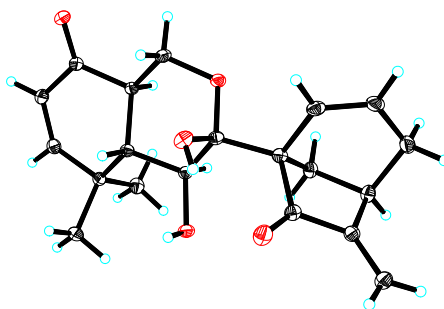

View of a molecule of maoericalysin B (**2**) with the atom-labelling scheme.  
Displacement ellipsoids are drawn at the 30% probability level.

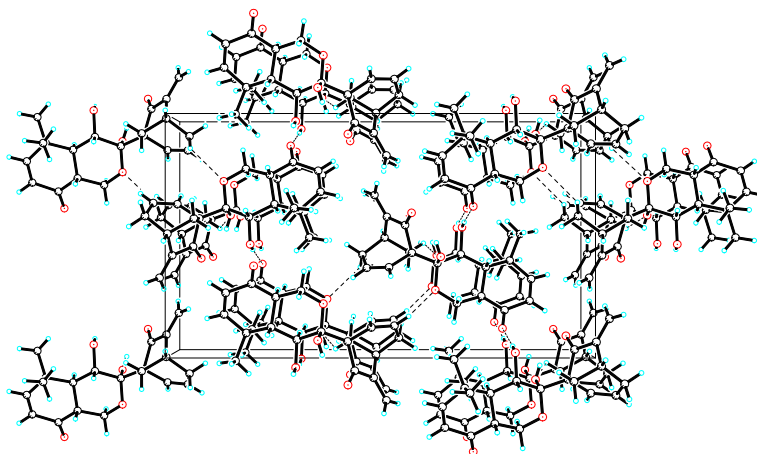

View of the pack drawing of maoericalysin B (**2**).  
Hydrogen-bonds are shown as dashed lines.

**Note: Crystal data and structure refinement for cu\_ maericalysin B (2) \_0m.**

|                                   |                                                |          |
|-----------------------------------|------------------------------------------------|----------|
| Identification code               | cu_ Maoericalysin B (2) _0m                    |          |
| Empirical formula                 | C <sub>20</sub> H <sub>24</sub> O <sub>5</sub> |          |
| Formula weight                    | 344.39                                         |          |
| Temperature                       | 100(2) K                                       |          |
| Wavelength                        | 1.54178 Å                                      |          |
| Crystal system                    | Orthorhombic                                   |          |
| Space group                       | P2 <sub>1</sub> 2 <sub>1</sub> 2 <sub>1</sub>  |          |
| Unit cell dimensions              | a = 6.1036(4) Å                                | α = 90°. |
|                                   | b = 12.5506(7) Å                               | β = 90°. |
|                                   | c = 21.9760(13) Å                              | γ = 90°. |
| Volume                            | 1683.45(18) Å <sup>3</sup>                     |          |
| Z                                 | 4                                              |          |
| Density (calculated)              | 1.359 Mg/m <sup>3</sup>                        |          |
| Absorption coefficient            | 0.792 mm <sup>-1</sup>                         |          |
| F(000)                            | 736                                            |          |
| Crystal size                      | 0.850 x 0.450 x 0.010 mm <sup>3</sup>          |          |
| Theta range for data collection   | 4.023 to 70.204°.                              |          |
| Index ranges                      | -7<=h<=7, -15<=k<=14, -26<=l<=26               |          |
| Reflections collected             | 18010                                          |          |
| Independent reflections           | 3157 [R(int) = 0.0539]                         |          |
| Completeness to theta = 67.679°   | 99.8 %                                         |          |
| Absorption correction             | Semi-empirical from equivalents                |          |
| Refinement method                 | Full-matrix least-squares on F <sup>2</sup>    |          |
| Data / restraints / parameters    | 3157 / 0 / 234                                 |          |
| Goodness-of-fit on F <sup>2</sup> | 1.072                                          |          |
| Final R indices [I>2sigma(I)]     | R1 = 0.0353, wR2 = 0.0939                      |          |
| R indices (all data)              | R1 = 0.0356, wR2 = 0.0942                      |          |
| Absolute structure parameter      | 0.07(5)                                        |          |
| Extinction coefficient            | n/a                                            |          |
| Largest diff. peak and hole       | 0.280 and -0.184 e.Å <sup>-3</sup>             |          |

## 4. Results of the calculated $^{13}\text{C}$ and $^1\text{H}$ chemical shifts of possible candidates.

### 4.1 Results of DFT calculated $^{13}\text{C}$ and $^1\text{H}$ chemical shifts of 1.

Table S1 Results of DFT calculated  $^{13}\text{C}$  shifts of 1.

| No.                            | Experimental ( $\delta_{\text{C}}$ , ppm) | Calculated ( $\delta_{\text{C}}$ , ppm) |
|--------------------------------|-------------------------------------------|-----------------------------------------|
| 1                              | 204.8                                     | 196.4                                   |
| 2                              | 127.1                                     | 123.6                                   |
| 3                              | 179.8                                     | 180.8                                   |
| 4                              | 72.1                                      | 69.9                                    |
| 5                              | 53.9                                      | 53.0                                    |
| 6                              | 73.9                                      | 71.9                                    |
| 7                              | 97.6                                      | 95.4                                    |
| 8                              | 51.8                                      | 52.1                                    |
| 9                              | 38.6                                      | 40.1                                    |
| 10                             | 51.0                                      | 50.7                                    |
| 11                             | 16.3                                      | 18.4                                    |
| 12                             | 32.6                                      | 35.0                                    |
| 13                             | 35.0                                      | 37.0                                    |
| 14                             | 25.7                                      | 26.8                                    |
| 15                             | 74.8                                      | 72.1                                    |
| 16                             | 156.3                                     | 154.6                                   |
| 17                             | 109.8                                     | 108.8                                   |
| 18                             | 29.8                                      | 29.6                                    |
| 19                             | 29.8                                      | 29.7                                    |
| 20                             | 67.0                                      | 66.0                                    |
| 15- <u>OCO</u> CH <sub>3</sub> | 170.9                                     | 163.9                                   |
| 15-OCO <u>CH</u> <sub>3</sub>  | 21.7                                      | 22.7                                    |
| <b>R<sup>2</sup></b>           |                                           | <b>0.9989</b>                           |
| <b>MAE</b>                     |                                           | <b>2.0</b>                              |
| <b>CMAE</b>                    |                                           | <b>1.4</b>                              |

**Table S2** Results of DFT calculated  $^1\text{H}$  shifts of **1**.

| No.                   | Experimental ( $\delta_{\text{H}}$ , ppm) | Calculated ( $\delta_{\text{H}}$ , ppm) |
|-----------------------|-------------------------------------------|-----------------------------------------|
| 2                     | 5.86                                      | 5.91                                    |
| 5                     | 3.48                                      | 3.69                                    |
| 6                     | 4.28                                      | 4.33                                    |
| 9                     | 2.52                                      | 2.46                                    |
| 11a                   | 2.07                                      | 2.17                                    |
| 11b                   | 1.73                                      | 1.69                                    |
| 12a                   | 2.23                                      | 2.09                                    |
| 12b                   | 1.48                                      | 1.50                                    |
| 13                    | 2.71                                      | 2.61                                    |
| 14a                   | 2.03                                      | 1.90                                    |
| 14b                   | 1.60                                      | 1.20                                    |
| 15                    | 5.62                                      | 5.76                                    |
| 17a                   | 5.11                                      | 5.44                                    |
| 17b                   | 4.85                                      | 5.23                                    |
| 18                    | 1.56                                      | 1.50                                    |
| 19                    | 1.55                                      | 1.51                                    |
| 20a                   | 4.12                                      | 4.00                                    |
| 20b                   | 3.78                                      | 3.72                                    |
| 15-OCOCH <sub>3</sub> | 2.13                                      | 2.19                                    |
| <b>R<sup>2</sup></b>  |                                           | <b>0.9917</b>                           |
| <b>MAE</b>            |                                           | <b>0.13</b>                             |
| <b>CMAE</b>           |                                           | <b>0.11</b>                             |

**4.2 Results of DFT calculated  $^{13}\text{C}$  and  $^1\text{H}$  chemical shifts of 3a and 3b.****Table S3** Results of DFT calculated  $^{13}\text{C}$  shifts of **3a** and **3b**.

| No. | Experimental ( $\delta_{\text{C}}$ , ppm) | Calculated ( $\delta_{\text{C}}$ , ppm) |           |
|-----|-------------------------------------------|-----------------------------------------|-----------|
|     |                                           | <b>3a</b>                               | <b>3b</b> |
| 1   | 198.2                                     | 189.5                                   | 191.5     |



|                               |       |               |               |
|-------------------------------|-------|---------------|---------------|
| 2                             | 124.8 | 122.0         | 122.4         |
| 3                             | 162.2 | 158.9         | 159.9         |
| 4                             | 36.0  | 36.6          | 37.2          |
| 5                             | 48.4  | 47.2          | 51.1          |
| 6                             | 70.6  | 70.5          | 71.9          |
| 7                             | 98.0  | 96.0          | 95.7          |
| 8                             | 52.8  | 54.2          | 56.0          |
| 9                             | 130.2 | 129.9         | 127.9         |
| 10                            | 43.4  | 43.3          | 39.2          |
| 11                            | 128.5 | 126.6         | 131.5         |
| 12                            | 38.5  | 40.5          | 40.5          |
| 13                            | 37.6  | 39.7          | 38.2          |
| 14                            | 33.7  | 35.4          | 32.7          |
| 15                            | 80.4  | 80.1          | 80.7          |
| 16                            | 152.2 | 149.9         | 150.4         |
| 17                            | 108.7 | 107.6         | 106.7         |
| 18                            | 31.1  | 31.4          | 29.5          |
| 19                            | 20.1  | 21.3          | 22.3          |
| 20                            | 58.9  | 59.0          | 60.8          |
| 15- <u>OCOCH</u> <sub>3</sub> | 173.8 | 168.0         | 167.7         |
| 15- <u>OCOCH</u> <sub>3</sub> | 21.3  | 22.3          | 22.2          |
| <b>R<sup>2</sup></b>          |       | <b>0.9995</b> | <b>0.9984</b> |
| <b>MAE</b>                    |       | <b>1.8</b>    | <b>2.4</b>    |
| <b>CMAE</b>                   |       | <b>1.0</b>    | <b>1.7</b>    |

**Table S4** Results of DFT calculated <sup>1</sup>H shifts of **3a** and **3b**.

| No. | Experimental<br>( $\delta_{\text{H}}$ , ppm) | Calculated ( $\delta_{\text{H}}$ , ppm) |           |
|-----|----------------------------------------------|-----------------------------------------|-----------|
|     |                                              | <b>3a</b>                               | <b>3b</b> |
| 2   | 5.81                                         | 5.85                                    | 5.82      |
| 3   | 6.52                                         | 6.82                                    | 7.06      |
| 5   | 2.15                                         | 2.14                                    | 1.78      |

|                       |      |               |               |
|-----------------------|------|---------------|---------------|
| 6                     | 3.63 | 3.70          | 3.90          |
| 9                     | 5.95 | 6.45          | 6.42          |
| 10                    | 2.41 | 2.33          | 3.11          |
| 11                    | 5.76 | 5.98          | 6.23          |
| 12a                   | 2.51 | 2.48          | 2.48          |
| 12b                   | 2.08 | 2.05          | 2.07          |
| 13                    | 2.89 | 2.72          | 2.72          |
| 14a                   | 2.03 | 2.22          | 2.49          |
| 14b                   | 1.93 | 1.84          | 1.71          |
| 15                    | 5.83 | 5.72          | 6.57          |
| 17a                   | 5.13 | 5.45          | 5.37          |
| 17b                   | 5.04 | 5.43          | 5.31          |
| 18                    | 1.39 | 1.41          | 1.40          |
| 19                    | 1.17 | 1.23          | 1.19          |
| 20a                   | 3.93 | 3.84          | 4.06          |
| 20b                   | 3.70 | 3.57          | 3.73          |
| 15-OCOCH <sub>3</sub> | 2.09 | 2.07          | 2.07          |
| <b>R<sup>2</sup></b>  |      | <b>0.9927</b> | <b>0.9828</b> |
| <b>MAE</b>            |      | <b>0.14</b>   | <b>0.26</b>   |
| <b>CMAE</b>           |      | <b>0.12</b>   | <b>0.17</b>   |

### 4.3 Results of DFT calculated <sup>13</sup>C and <sup>1</sup>H chemical shifts of 4a–4e.

**Table S5** Results of DFT calculated <sup>13</sup>C shifts of 4a–4e.

| No. | Experimental<br>( $\delta_C$ , ppm) | Calculated ( $\delta_C$ , ppm) |      |      |      |      |
|-----|-------------------------------------|--------------------------------|------|------|------|------|
|     |                                     | 4a                             | 4b   | 4c   | 4d   | 4e   |
| 1   | 97.0                                | 95.4                           | 80.2 | 79.1 | 78.7 | 79.0 |
| 2   | 29.3                                | 30.7                           | 27.9 | 29.7 | 28.0 | 28.6 |
| 3   | 33.7                                | 33.0                           | 38.4 | 38.0 | 36.7 | 35.2 |
| 4   | 32.2                                | 32.9                           | 31.8 | 32.4 | 32.6 | 32.1 |
| 5   | 56.0                                | 54.6                           | 44.4 | 46.3 | 48.3 | 51.1 |
| 6   | 69.9                                | 67.9                           | 71.6 | 70.9 | 69.2 | 67.7 |
| 7   | 97.9                                | 95.7                           | 96.4 | 98.0 | 94.4 | 94.9 |

|                       |       |               |               |               |               |               |
|-----------------------|-------|---------------|---------------|---------------|---------------|---------------|
| 8                     | 51.4  | 53.7          | 56.4          | 53.7          | 56.0          | 53.7          |
| 9                     | 128.9 | 128.6         | 132.4         | 131.1         | 132.0         | 131.4         |
| 10                    | 68.7  | 66.6          | 64.0          | 60.8          | 57.8          | 57.2          |
| 11                    | 127.4 | 126.4         | 120.7         | 122.8         | 121.1         | 121.8         |
| 12                    | 38.2  | 40.6          | 39.3          | 37.7          | 39.4          | 39.8          |
| 13                    | 38.6  | 40.2          | 40.0          | 41.4          | 40.0          | 39.3          |
| 14                    | 32.3  | 34.0          | 33.6          | 34.1          | 33.5          | 32.7          |
| 15                    | 80.7  | 80.5          | 80.1          | 77.9          | 79.9          | 80.7          |
| 16                    | 153.2 | 150.3         | 152.5         | 155.4         | 152.4         | 149.9         |
| 17                    | 109.9 | 108.6         | 109.6         | 112.5         | 109.4         | 108.0         |
| 18                    | 28.3  | 28.3          | 33.7          | 31.3          | 31.1          | 30.4          |
| 19                    | 29.8  | 30.3          | 21.4          | 21.8          | 23.5          | 25.1          |
| 20                    | 67.3  | 66.0          | 62.9          | 65.8          | 56.1          | 60.9          |
| 6-OCOCH <sub>3</sub>  | 168.5 | 161.3         | 163.8         | 163.7         | 165.5         | 162.1         |
| 6-OCOCH <sub>3</sub>  | 21.6  | 22.2          | 23.3          | 23.9          | 23.2          | 22.9          |
| 15-OCOCH <sub>3</sub> | 174.0 | 169.7         | 167.5         | 161.8         | 167.1         | 168.4         |
| 15-OCOCH <sub>3</sub> | 21.9  | 23.4          | 22.0          | 21.9          | 22.1          | 22.4          |
| <b>R<sup>2</sup></b>  |       | <b>0.9992</b> | <b>0.9881</b> | <b>0.9871</b> | <b>0.9873</b> | <b>0.9908</b> |
| <b>MAE</b>            |       | <b>1.7</b>    | <b>3.9</b>    | <b>4.0</b>    | <b>4.1</b>    | <b>3.6</b>    |
| <b>CMAE</b>           |       | <b>1.1</b>    | <b>3.8</b>    | <b>3.9</b>    | <b>4.1</b>    | <b>3.1</b>    |

**Table S6** Results of DFT calculated <sup>1</sup>H shifts of **4a–4e**.

| No. | Experimental<br>( $\delta_{\text{H}}$ , ppm) | Calculated ( $\delta_{\text{H}}$ , ppm) |           |           |           |           |
|-----|----------------------------------------------|-----------------------------------------|-----------|-----------|-----------|-----------|
|     |                                              | <b>4a</b>                               | <b>4b</b> | <b>4c</b> | <b>4d</b> | <b>4e</b> |
| 2a  | 2.07                                         | 2.06                                    | 2.16      | 2.18      | 2.02      | 2.03      |
| 2b  | 1.40                                         | 1.36                                    | 1.78      | 1.77      | 1.70      | 1.81      |
| 3a  | 1.51                                         | 1.65                                    | 1.45      | 1.46      | 1.46      | 1.33      |
| 3b  | 1.30                                         | 1.20                                    | 1.03      | 1.15      | 0.90      | 1.19      |
| 5   | 1.57                                         | 1.53                                    | 2.28      | 1.83      | 1.97      | 1.47      |
| 6   | 5.23                                         | 5.37                                    | 5.49      | 5.33      | 5.24      | 5.25      |
| 9   | 5.86                                         | 6.45                                    | 6.43      | 6.35      | 6.43      | 6.50      |
| 11  | 5.73                                         | 5.98                                    | 5.75      | 5.70      | 5.78      | 5.81      |
| 12a | 2.47                                         | 2.42                                    | 2.47      | 2.33      | 2.48      | 2.38      |
| 12b | 2.07                                         | 2.01                                    | 1.97      | 1.80      | 2.00      | 1.97      |

|                       |      |               |               |               |               |               |
|-----------------------|------|---------------|---------------|---------------|---------------|---------------|
| 13                    | 2.82 | 2.66          | 2.66          | 2.70          | 2.67          | 2.69          |
| 14a                   | 1.97 | 1.95          | 2.61          | 2.29          | 2.53          | 1.95          |
| 14b                   | 1.30 | 1.26          | 1.76          | 2.12          | 1.70          | 1.79          |
| 15                    | 6.27 | 6.54          | 5.63          | 5.68          | 5.69          | 5.73          |
| 17a                   | 5.14 | 5.47          | 5.51          | 5.80          | 5.29          | 5.45          |
| 17b                   | 4.95 | 5.36          | 5.28          | 5.56          | 5.51          | 5.40          |
| 18                    | 1.22 | 1.26          | 0.89          | 0.76          | 0.84          | 0.90          |
| 19                    | 1.02 | 0.97          | 1.06          | 1.14          | 1.11          | 1.05          |
| 20a                   | 3.94 | 3.86          | 4.28          | 4.21          | 4.06          | 4.01          |
| 20b                   | 3.76 | 3.71          | 3.19          | 3.75          | 3.85          | 3.77          |
| 6-OCOCH <sub>3</sub>  | 2.05 | 1.97          | 2.30          | 2.03          | 2.23          | 1.99          |
| 15-OCOCH <sub>3</sub> | 2.11 | 2.11          | 2.09          | 2.05          | 2.08          | 2.09          |
| <b>R<sup>2</sup></b>  |      | <b>0.9956</b> | <b>0.9556</b> | <b>0.9632</b> | <b>0.9724</b> | <b>0.9784</b> |
| <b>MAE</b>            |      | <b>0.13</b>   | <b>0.31</b>   | <b>0.27</b>   | <b>0.24</b>   | <b>0.19</b>   |
| <b>CMAE</b>           |      | <b>0.09</b>   | <b>0.31</b>   | <b>0.27</b>   | <b>0.23</b>   | <b>0.18</b>   |

## 5. The DFT calculated key spin-spin coupling constants of **4**.

**Table S7** key spin-spin coupling constants of **4** ( $J_{H5/H6}$  and  $J_{H20a/H20b}$ ).

|             | Experimental<br>( $J$ , Hz) | Calculated ( $J$ , Hz) |           |           |           |           |
|-------------|-----------------------------|------------------------|-----------|-----------|-----------|-----------|
|             |                             | <b>4a</b>              | <b>4b</b> | <b>4c</b> | <b>4d</b> | <b>4e</b> |
| H-5/H-6     | <b>1.0</b>                  | 1.2                    | 10.4      | 6.8       | 8.4       | 0.8       |
| H-20a/H-20b | <b>8.8</b>                  | 8.8                    | 11.5      | 11.9      | 11.5      | 11.5      |

## 6. The quantitative analysis of key interproton distances of **1** and **4**.

**Table S8** Key interproton distances of **1** (experimental and calculated).

| H-a/H-b                | Experimental interproton distances (Å) | Calculated interproton distances (Å) |
|------------------------|----------------------------------------|--------------------------------------|
| H-2/H <sub>3</sub> -19 | 3.00                                   | 3.14                                 |
| H-5/H-9                | 2.18                                   | 2.20                                 |
| H-20a/H-11b            | 2.25                                   | 2.20                                 |
| H-6/H-20b              | 2.53                                   | 2.51                                 |
| H-15/H-14b             | 2.45                                   | 2.37                                 |
| H-15/H-17b             | 3.22                                   | 3.19                                 |
| H-17a/H-17b            | 1.86                                   | 1.88                                 |
| H-17a/H-13             | 2.78                                   | 2.69                                 |
| <b>MAD</b>             |                                        | <b>0.06</b>                          |
| <b>STD</b>             |                                        | <b>0.43</b>                          |

**Table S9** Key interproton distances of **4** (experimental and calculated).

| H-a/H-b     | Experimental interproton distances (Å) | Calculated interproton distances (Å) |             |             |             |             |
|-------------|----------------------------------------|--------------------------------------|-------------|-------------|-------------|-------------|
|             |                                        | <b>4a</b>                            | <b>4b</b>   | <b>4c</b>   | <b>4d</b>   | <b>4e</b>   |
| H-15/H-17b  | 3.13                                   | 3.07                                 | 2.94        | 2.68        | 2.93        | 3.15        |
| H-15/H-14a  | 2.54                                   | 2.70                                 | 2.64        | 3.64        | 2.58        | 2.41        |
| H-9/H-3a    | 2.63                                   | 2.86                                 | 8.19        | 6.98        | 8.02        | 7.55        |
| H-9/H-6     | 2.57                                   | 2.44                                 | 4.39        | 3.27        | 4.18        | 3.97        |
| H-9/H-11    | 2.43                                   | 2.51                                 | 2.44        | 2.35        | 2.37        | 2.44        |
| H-6/H-3a    | 2.27                                   | 2.51                                 | 4.86        | 4.61        | 4.64        | 4.42        |
| H-6/H-5     | 2.87                                   | 2.78                                 | 3.06        | 2.90        | 2.94        | 2.78        |
| H-20b/H-5   | 2.46                                   | 2.36                                 | 2.43        | 2.69        | 3.14        | 3.13        |
| H-17a/H-13  | 2.79                                   | 2.70                                 | 2.70        | 2.60        | 2.68        | 2.82        |
| H-17a/H-17b | 1.87                                   | 1.87                                 | 1.87        | 1.87        | 1.82        | 1.87        |
| H3-19/H-3a  | 2.79                                   | 2.83                                 | 3.32        | 3.35        | 3.06        | 3.58        |
| H3-19/H-6   | 2.34                                   | 2.33                                 | 3.01        | 2.90        | 2.52        | 3.11        |
| <b>MAD</b>  |                                        | <b>0.12</b>                          | <b>1.06</b> | <b>0.95</b> | <b>1.06</b> | <b>0.94</b> |
| <b>STD</b>  |                                        | <b>0.30</b>                          | <b>1.62</b> | <b>1.27</b> | <b>1.44</b> | <b>1.32</b> |

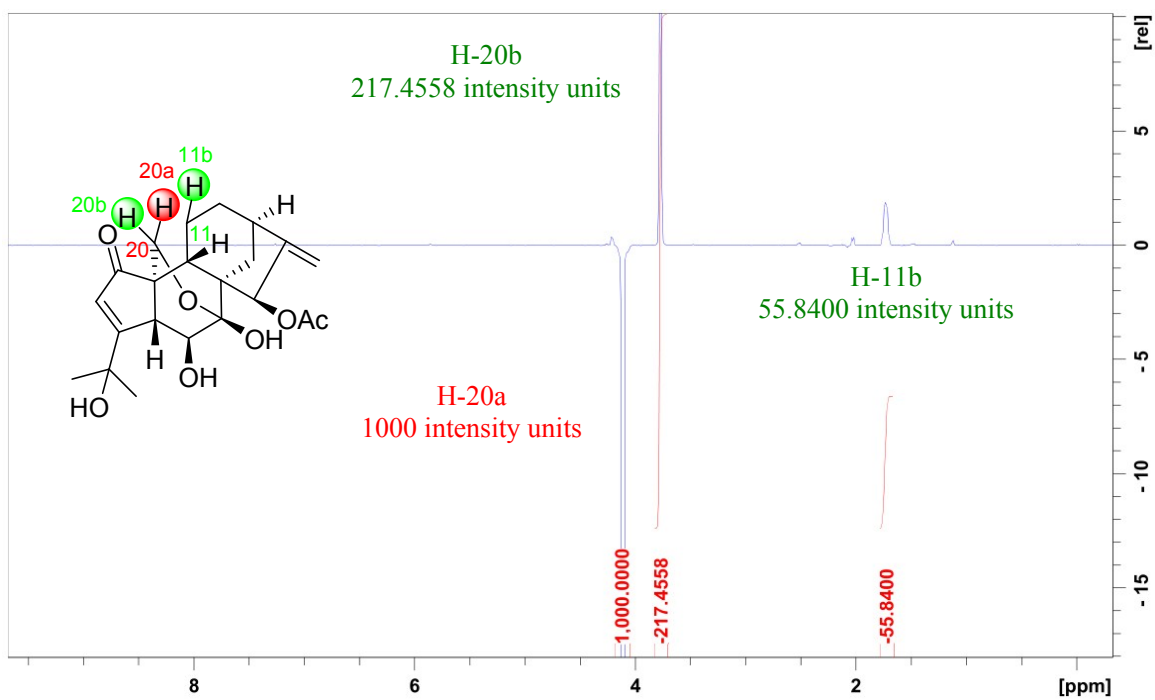

**Figure S4** 2D ROESY f1 slice at f2 chemical shifts (800 MHz, CDCl<sub>3</sub>) of H-20a of **1**, with red integrals as the intensity of each proton.

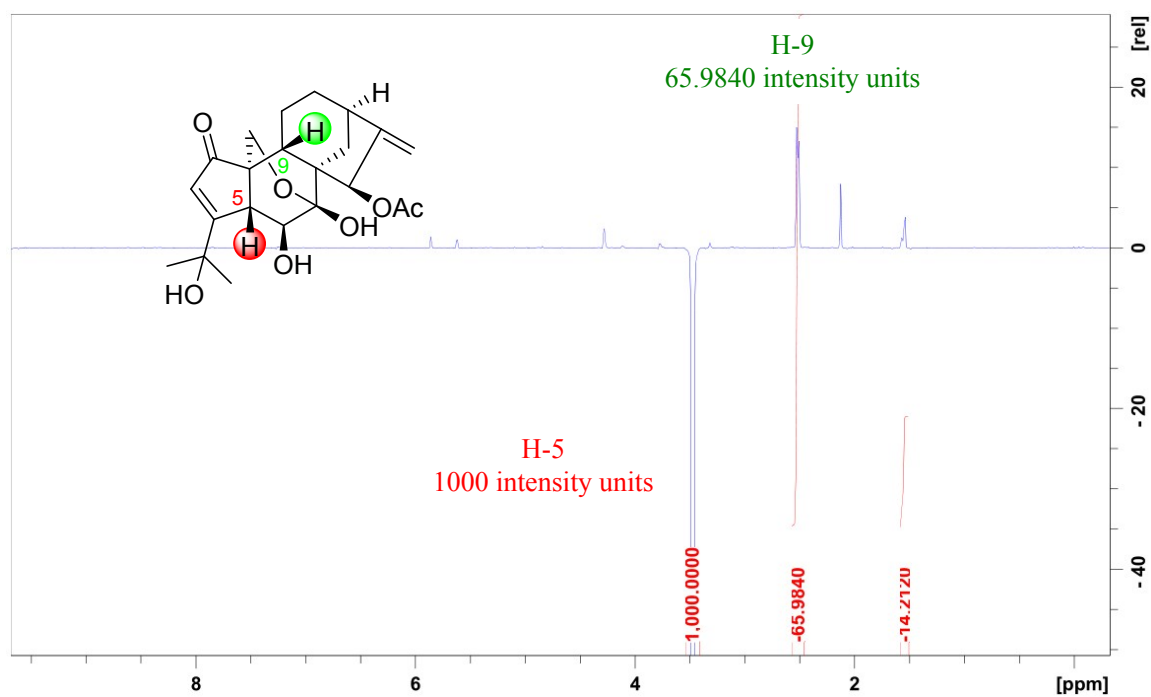

**Figure S5** 2D ROESY f1 slice at f2 chemical shifts (800 MHz, CDCl<sub>3</sub>) of H-5 of **1**, with red integrals as the intensity of each proton.

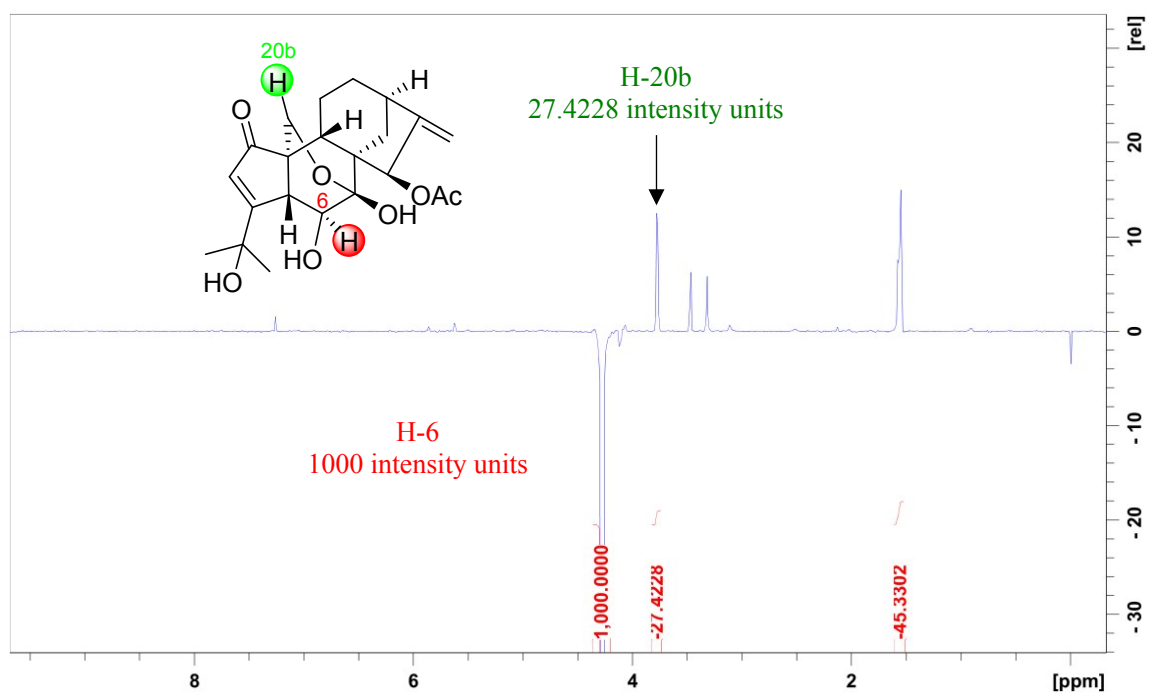

**Figure S6** 2D ROESY f1 slice at f2 chemical shifts (800 MHz, CDCl<sub>3</sub>) of H-6 of **1**, with red integrals as the intensity of each proton.

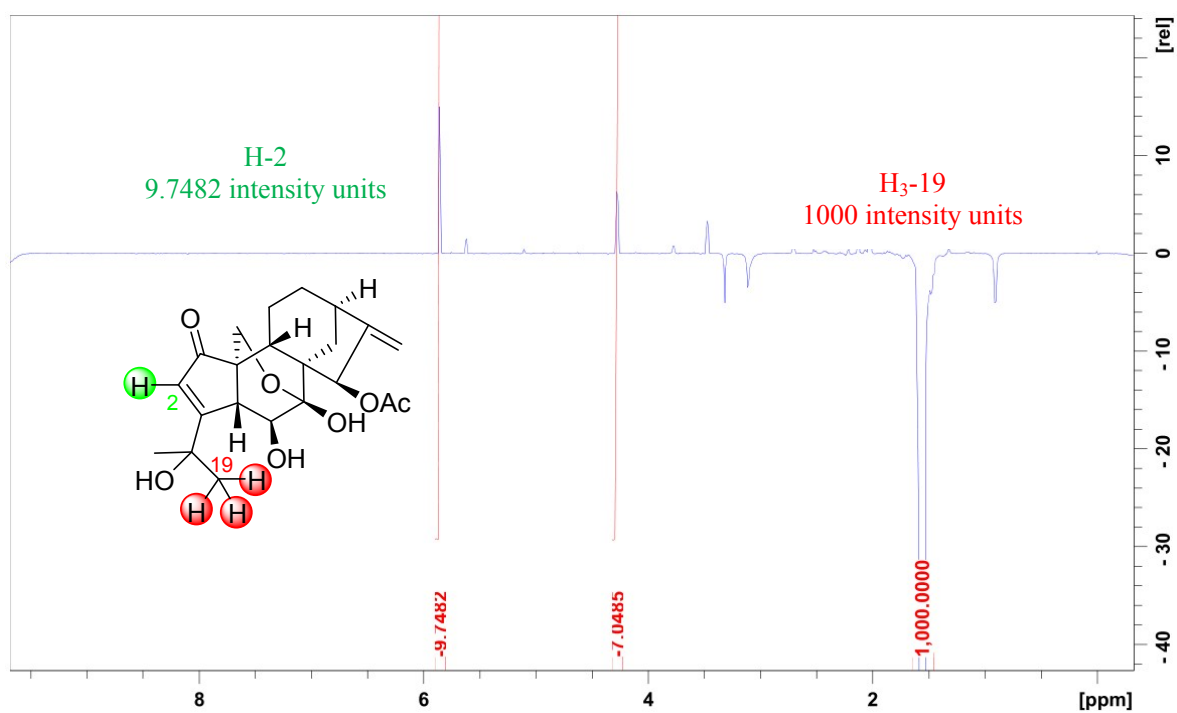

**Figure S7** 2D ROESY f1 slice at f2 chemical shifts (800 MHz, CDCl<sub>3</sub>) of H<sub>3</sub>-19 of **1**, with red integrals as the intensity of each proton.



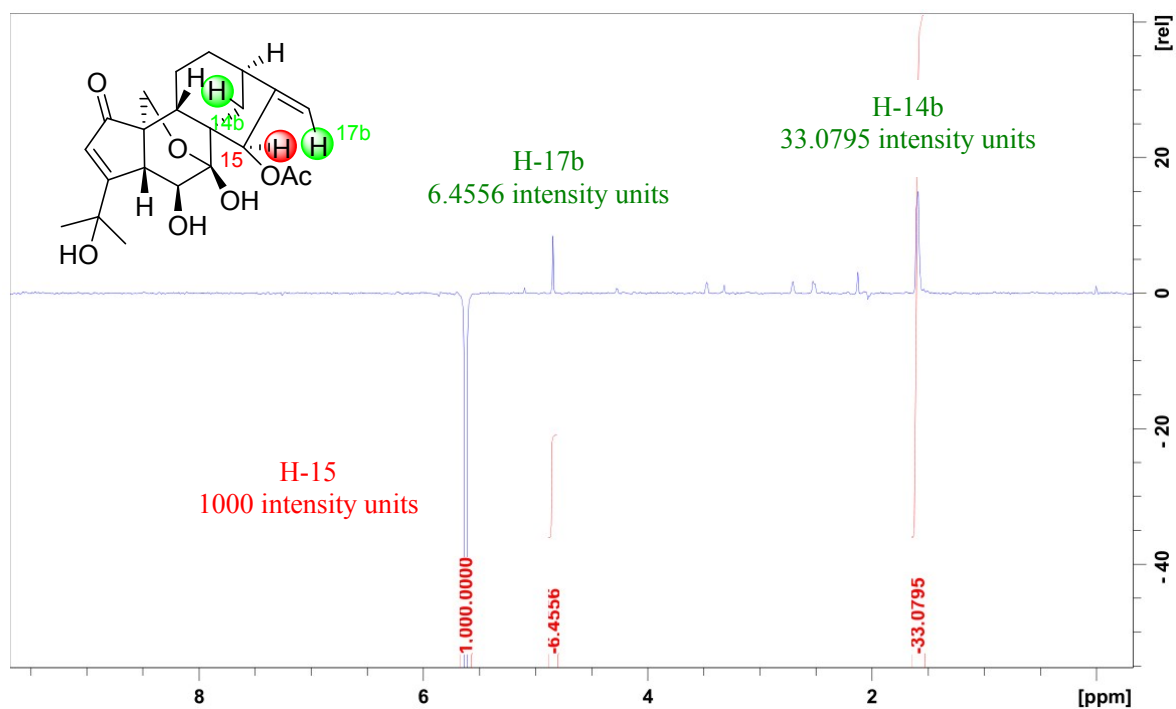

**Figure S8** 2D ROESY f1 slice at f2 chemical shifts (800 MHz, CDCl<sub>3</sub>) of H-15 of **1**, with red integrals as the intensity of each proton.

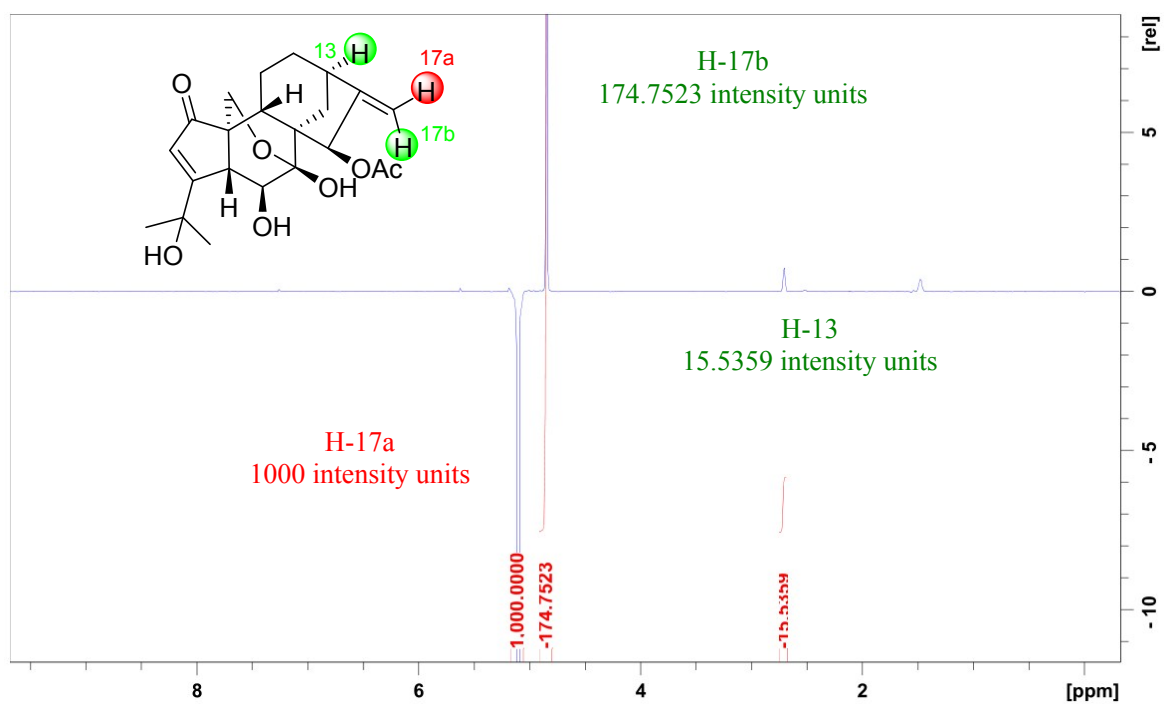

**Figure S9** 2D ROESY f1 slice at f2 chemical shifts (800 MHz, CDCl<sub>3</sub>) of H-17a of **1**, with red integrals as the intensity of each proton.

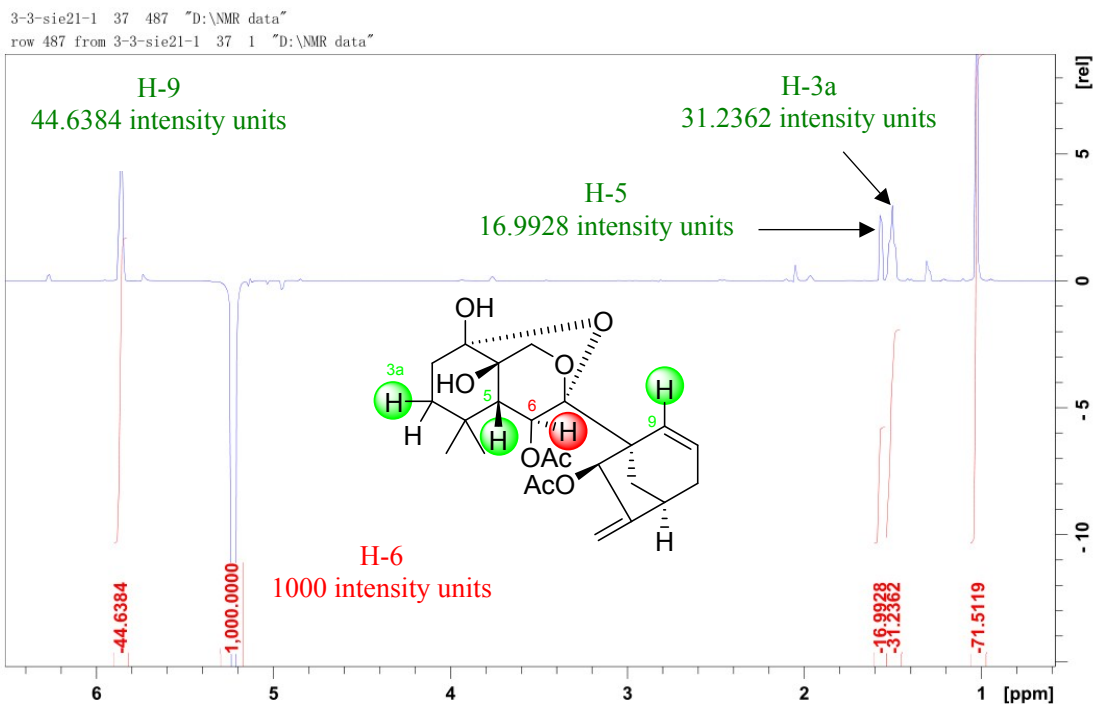

**Figure S10** 2D ROESY f1 slice at f2 chemical shifts (800 MHz, CDCl<sub>3</sub>) of H-6 of **4**, with red integrals as the intensity of each proton.

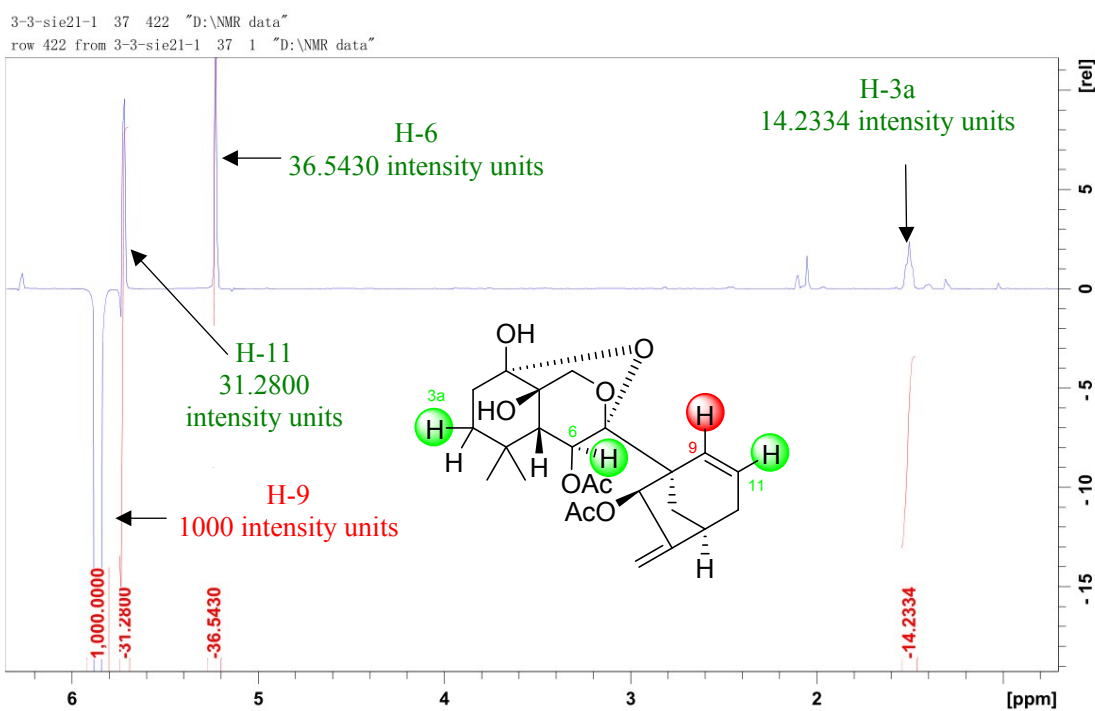

**Figure S11** 2D ROESY f1 slice at f2 chemical shifts (800 MHz, CDCl<sub>3</sub>) of H-9 of **4**, with red integrals as the intensity of each proton.

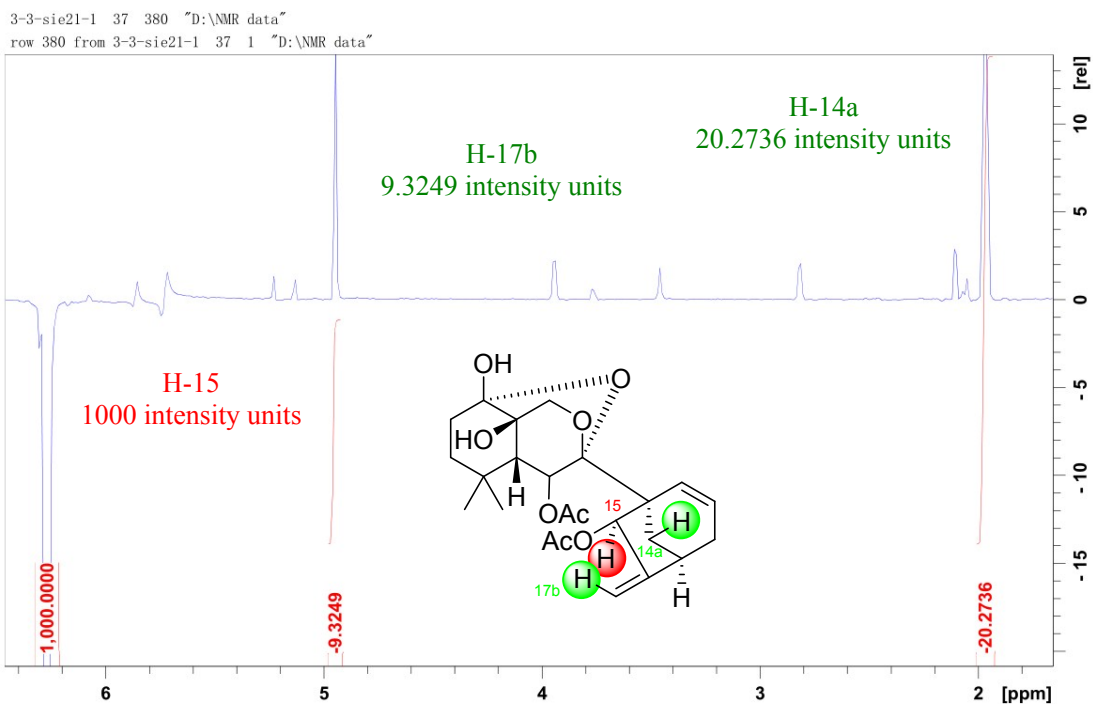

**Figure S12** 2D ROESY f1 slice at f2 chemical shifts (800 MHz, CDCl<sub>3</sub>) of H-15 of **4**, with red integrals as the intensity of each proton.

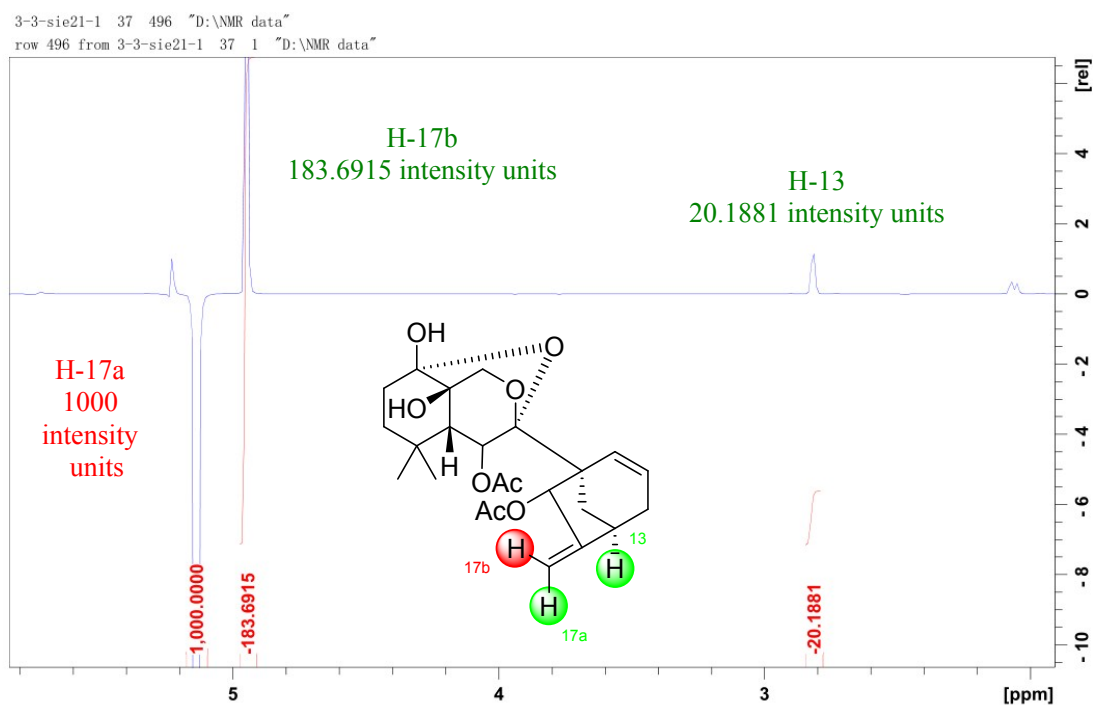

**Figure S13** 2D ROESY f1 slice at f2 chemical shifts (800 MHz, CDCl<sub>3</sub>) of H-17a of **4**, with red integrals as the intensity of each proton.

3-3-sie21-1 37 637 "D:\NMR data"  
row 637 from 3-3-sie21-1 37 1 "D:\NMR data"

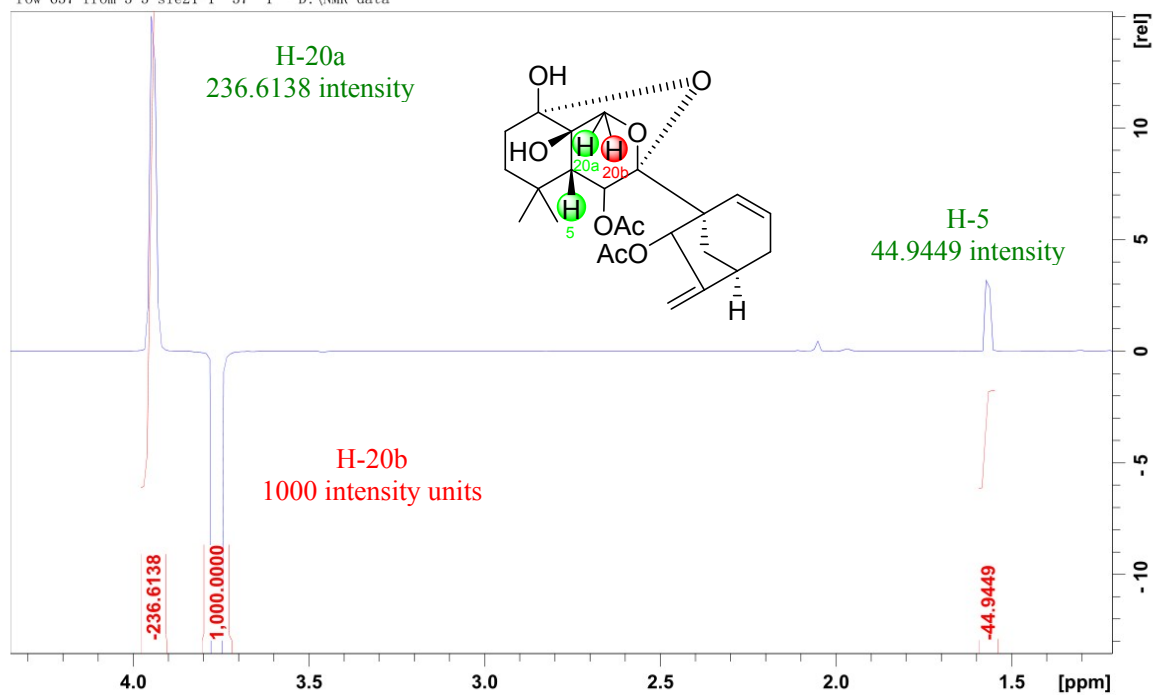

**Figure S14** 2D ROESY f1 slice at f2 chemical shifts (800 MHz, CDCl<sub>3</sub>) of H-20b of **4**, with red intergrals as the intensity of each proton.

## 7. Computational data of 1, 3 and 4.

### 7.1 Computational data — Maericalysin A (1)

Figure S15 One candidate of compound 1.

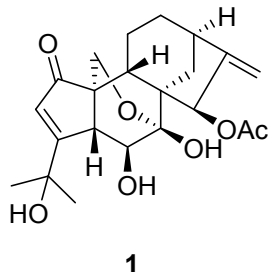

Figure S16 Optimized geometries of 4 dominant conformers of 1 at the M06-2X/def2-SVP level in the gas phase.

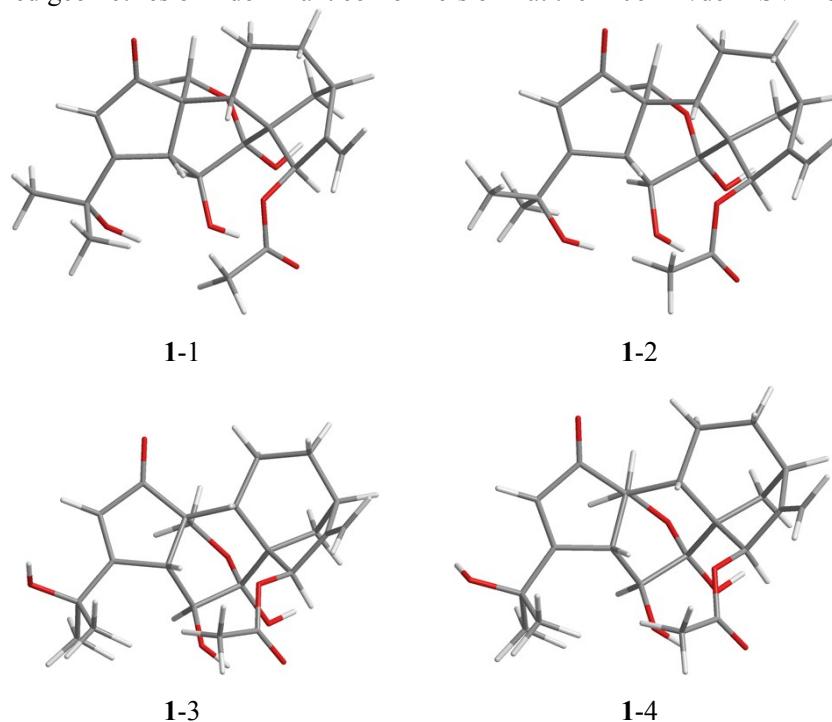

Table S10 Important thermodynamic parameters (a.u.) of the optimized **1** at the M06-2X/def2-SVP level in the gas phase.

| Conformers | $U(0)^a$     | $U(T)^b$     | $H(T)^c$     | $G(T)^d$     |
|------------|--------------|--------------|--------------|--------------|
| <b>1-1</b> | -1379.708057 | -1379.682096 | -1379.681152 | -1379.761499 |
| <b>1-2</b> | -1379.710340 | -1379.684835 | -1379.683891 | -1379.762255 |
| <b>1-3</b> | -1379.705380 | -1379.679292 | -1379.678348 | -1379.758569 |
| <b>1-4</b> | -1379.705241 | -1379.679146 | -1379.678202 | -1379.758373 |

<sup>a</sup> $U(0)$  = electronic energy ( $\epsilon_{ele}$ ) + zero point energy (ZPE); <sup>b</sup> $U(T) = \epsilon_{ele} + ZPE + \Delta U_{0 \rightarrow T}$ ;

<sup>c</sup> $H(T) = \epsilon_{ele} + ZPE + \Delta H_{0 \rightarrow T}$ ; <sup>d</sup> $G(T) = \epsilon_{ele} + ZPE + \Delta G_{0 \rightarrow T}$

Table S11 Conformational analysis of the optimized **1** at the M06-2X/def2-SVP level in the gas phase.

| Conformers | $\Delta G(\text{kcal/mol})$ | Population |
|------------|-----------------------------|------------|
| <b>1-1</b> | 0.00                        | 67.34%     |
| <b>1-2</b> | 0.47                        | 30.21%     |
| <b>1-3</b> | 2.31                        | 1.35%      |

|            |      |       |
|------------|------|-------|
| <b>1-4</b> | 2.44 | 1.10% |
|------------|------|-------|

<sup>a</sup>relative  $G(T)$  in kcal/mol. <sup>b</sup>Conformational distribution calculated at the M06-2X/def2-SVP level in the gas phase. (T=298.15 K)

**Figure S17** Regression analysis of experimental versus calculated NMR chemical shifts of **1**.

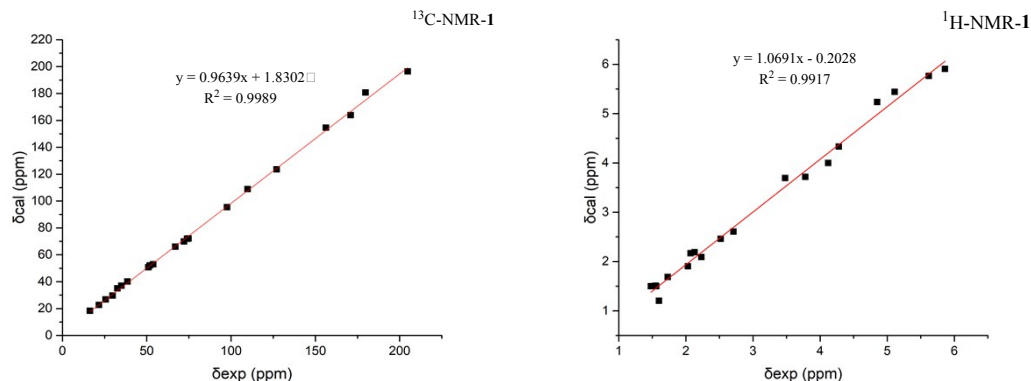

**Table S12** Optimized Z-matrixes of **1-1** in the gas phase (Å) at the M06-2X/def2-SVP level.

|   |          |          |          |   |          |          |          |
|---|----------|----------|----------|---|----------|----------|----------|
| C | -1.20746 | -2.45493 | -1.05574 | H | 3.539143 | -1.5086  | -2.11132 |
| C | -2.57015 | -1.86119 | -1.05667 | H | 4.192961 | -2.61045 | -0.89305 |
| C | -2.57252 | -0.67303 | -0.4211  | H | 4.874    | -0.5578  | 0.032574 |
| C | -3.71757 | 0.311622 | -0.24982 | H | 2.930443 | -1.68267 | 1.583027 |
| C | -1.17493 | -0.30487 | 0.013709 | H | 3.33613  | 0.027284 | 1.879944 |
| C | -0.86169 | 0.331442 | 1.362685 | H | 2.252604 | 1.835597 | 0.791924 |
| C | 0.545792 | -0.16512 | 1.749019 | H | 4.727915 | 1.031891 | -2.27454 |
| C | 1.582935 | -0.21657 | 0.604658 | H | 3.351601 | 2.293534 | -2.15188 |
| C | 1.068871 | -1.20419 | -0.51942 | H | -4.34651 | 0.202663 | -2.31487 |
| C | -0.35691 | -1.59851 | -0.11662 | H | -5.2519  | -0.8871  | -1.22071 |
| C | 2.045019 | -2.35402 | -0.77006 | H | -5.56209 | 0.872374 | -1.19361 |
| C | 3.453449 | -1.81267 | -1.05751 | H | -4.69813 | -0.8549  | 1.318218 |
| C | 3.792657 | -0.59544 | -0.15526 | H | -5.15126 | 0.878125 | 1.257562 |
| C | 2.957177 | -0.6852  | 1.129228 | H | -3.57726 | 0.392657 | 1.928582 |
| C | 2.029017 | 1.121292 | -0.01599 | H | 0.172129 | -3.27693 | 1.173768 |
| C | 3.298416 | 0.716237 | -0.74994 | H | -1.35674 | -2.47178 | 1.611106 |
| C | 3.82102  | 1.381912 | -1.77559 | H | -0.119   | 3.137403 | -2.61103 |
| C | -4.78723 | 0.103674 | -1.3139  | H | -1.33727 | 2.762296 | -1.37209 |
| C | -4.32209 | 0.164246 | 1.152555 | H | -0.65949 | 4.422242 | -1.46423 |
| C | -0.32559 | -2.29976 | 1.253966 | O | 0.944307 | 0.614669 | 2.818824 |
| C | 0.639401 | 2.96288  | -0.61508 | O | -0.95999 | 1.727919 | 1.266839 |
| C | -0.43559 | 3.357976 | -1.58384 | O | 0.386998 | -1.50263 | 2.187887 |
| H | -3.40498 | -2.33605 | -1.57102 | O | -3.23188 | 1.629182 | -0.4314  |
| H | -0.80053 | 0.416747 | -0.72953 | O | 1.089855 | 1.715407 | -0.89201 |
| H | -1.51095 | -0.04779 | 2.172315 | O | 1.057079 | 3.630935 | 0.287489 |
| H | 0.989817 | -0.62747 | -1.45547 | H | -2.62777 | 1.862645 | 0.292757 |
| H | 1.678261 | -2.97229 | -1.59996 | H | 1.727832 | 0.220933 | 3.222467 |
| H | 2.075443 | -3.01365 | 0.110109 | O | -0.83723 | -3.43984 | -1.64416 |
|   |          |          |          | H | -0.44953 | 2.131188 | 1.985435 |

**Table S13** Optimized Z-matrixes of 1-2 in the gas phase (Å) at the M06-2X/def2-SVP level.

|   |          |          |          |   |          |          |          |
|---|----------|----------|----------|---|----------|----------|----------|
| C | -1.29094 | -2.43589 | -1.02919 | H | 3.50783  | -1.67371 | -2.08123 |
| C | -2.64955 | -1.83489 | -0.99265 | H | 4.083171 | -2.78874 | -0.83596 |
| C | -2.62358 | -0.63213 | -0.38588 | H | 4.845477 | -0.75154 | 0.067787 |
| C | -3.76512 | 0.356099 | -0.22288 | H | 2.833607 | -1.78577 | 1.600932 |
| C | -1.20524 | -0.26375 | -0.00958 | H | 3.313946 | -0.09603 | 1.898703 |
| C | -0.86495 | 0.400062 | 1.318578 | H | 2.358064 | 1.736533 | 0.799158 |
| C | 0.519497 | -0.13839 | 1.732177 | H | 4.761075 | 0.788465 | -2.29126 |
| C | 1.566974 | -0.26184 | 0.602508 | H | 3.446084 | 2.115665 | -2.18869 |
| C | 1.019992 | -1.23707 | -0.51581 | H | -2.70054 | 1.892659 | -1.33709 |
| C | -0.41727 | -1.5806  | -0.11121 | H | -3.78859 | 0.900896 | -2.34201 |
| C | 1.949636 | -2.42821 | -0.75611 | H | -4.46589 | 2.13305  | -1.22831 |
| C | 3.386621 | -1.95848 | -1.0256  | H | -5.29847 | -0.85028 | -1.18876 |
| C | 3.765568 | -0.74793 | -0.13206 | H | -5.90381 | 0.403457 | -0.06914 |
| C | 2.912074 | -0.79219 | 1.145039 | H | -5.16173 | -1.0818  | 0.580969 |
| C | 2.089173 | 1.046222 | -0.01527 | H | 0.05705  | -3.24392 | 1.221537 |
| C | 3.330848 | 0.573712 | -0.75072 | H | -1.45378 | -2.38967 | 1.626811 |
| C | 3.8753   | 1.191806 | -1.79462 | H | 0.024252 | 4.547155 | -1.77849 |
| C | -3.67461 | 1.381448 | -1.3607  | H | -0.28464 | 2.889475 | -2.42873 |
| C | -5.11632 | -0.34435 | -0.23153 | H | -1.15604 | 3.48759  | -0.979   |
| C | -0.41583 | -2.2527  | 1.277004 | O | 0.94193  | 0.652082 | 2.785314 |
| C | 0.845971 | 2.982832 | -0.58661 | O | -0.90939 | 1.799525 | 1.174773 |
| C | -0.20331 | 3.50506  | -1.52649 | O | 0.306885 | -1.45642 | 2.203097 |
| H | -3.51013 | -2.3263  | -1.44546 | O | -3.67117 | 1.011812 | 1.026262 |
| H | -0.81993 | 0.423709 | -0.78289 | O | 1.181759 | 1.707771 | -0.87856 |
| H | -1.54813 | 0.078203 | 2.122606 | O | 1.321335 | 3.606941 | 0.319159 |
| H | 0.963262 | -0.66479 | -1.45675 | H | -2.91076 | 1.613682 | 1.021589 |
| H | 1.563455 | -3.03116 | -1.58818 | H | 1.685053 | 0.219412 | 3.224195 |
| H | 1.939534 | -3.08767 | 0.124496 | O | -0.94271 | -3.42535 | -1.62347 |
|   |          |          |          | H | -0.41819 | 2.197556 | 1.910095 |

**Table S14** Optimized Z-matrixes of 1-3 in the gas phase (Å) at the M06-2X/def2-SVP level.

|   |          |          |          |   |          |          |          |
|---|----------|----------|----------|---|----------|----------|----------|
| C | -1.32908 | -2.38338 | -1.06149 | H | 3.490953 | -1.70802 | -2.06454 |
| C | -2.67882 | -1.76754 | -1.02337 | H | 4.026437 | -2.85687 | -0.8323  |
| C | -2.63747 | -0.56949 | -0.40835 | H | 4.831863 | -0.8581  | 0.115117 |
| C | -3.81774 | 0.365053 | -0.25213 | H | 2.774445 | -1.85354 | 1.60994  |
| C | -1.21678 | -0.21528 | -0.02162 | H | 3.291048 | -0.17851 | 1.932589 |
| C | -0.85771 | 0.440136 | 1.310412 | H | 2.38057  | 1.697143 | 0.833969 |
| C | 0.504979 | -0.15028 | 1.732743 | H | 4.841135 | 0.732836 | -2.20067 |
| C | 1.559639 | -0.28778 | 0.612894 | H | 3.555996 | 2.089228 | -2.10394 |
| C | 0.998177 | -1.23509 | -0.52018 | H | -4.33693 | -0.44058 | 1.69779  |
| C | -0.45003 | -1.5484  | -0.13083 | H | -3.40547 | 1.09792  | 1.755868 |
| C | 1.902282 | -2.44488 | -0.766   | H | -5.1249  | 1.102471 | 1.274116 |
| C | 3.3529   | -2.00622 | -1.01468 | H | -2.65104 | 2.200466 | -0.32365 |
| C | 3.75518  | -0.82009 | -0.09822 | H | -4.36493 | 2.372347 | -0.81492 |
| C | 2.883737 | -0.85724 | 1.166235 | H | -3.19129 | 1.611829 | -1.92797 |

|   |          |          |          |   |          |          |          |
|---|----------|----------|----------|---|----------|----------|----------|
| C | 2.118057 | 1.013366 | 0.011901 | H | -0.02467 | -3.23588 | 1.187546 |
| C | 3.366852 | 0.5223   | -0.70106 | H | -1.52134 | -2.35524 | 1.586898 |
| C | 3.952642 | 1.147245 | -1.71821 | H | 0.335917 | 3.294139 | -2.63576 |
| C | -4.18388 | 0.537882 | 1.221842 | H | -0.98942 | 2.998741 | -1.48897 |
| C | -3.47798 | 1.725772 | -0.86958 | H | -0.15751 | 4.58784  | -1.47649 |
| C | -0.47676 | -2.23534 | 1.249474 | O | 0.940616 | 0.61586  | 2.799609 |
| C | 0.935362 | 2.978967 | -0.6026  | O | -0.84229 | 1.833435 | 1.177824 |
| C | -0.0276  | 3.511633 | -1.62348 | O | 0.251448 | -1.46449 | 2.191603 |
| H | -3.55755 | -2.23489 | -1.46491 | O | -4.96076 | -0.18614 | -0.87221 |
| H | -0.8202  | 0.468973 | -0.79199 | O | 1.244976 | 1.691078 | -0.87262 |
| H | -1.54212 | 0.128169 | 2.11991  | O | 1.384106 | 3.59268  | 0.322863 |
| H | 0.962687 | -0.65084 | -1.4546  | H | -4.79399 | -0.2301  | -1.82142 |
| H | 1.51143  | -3.02889 | -1.60918 | H | 1.64476  | 0.139521 | 3.257138 |
| H | 1.86847  | -3.11464 | 0.106296 | O | -0.98876 | -3.37085 | -1.66414 |
|   |          |          |          | H | -0.32487 | 2.203836 | 1.908581 |

**Table S15** Optimized Z-matrixes of **1-4** in the gas phase (Å) at the M06-2X/def2-SVP level.

|   |          |          |          |   |          |          |          |
|---|----------|----------|----------|---|----------|----------|----------|
| C | -1.32017 | -2.37273 | -1.08189 | H | 3.493705 | -1.69414 | -2.06344 |
| C | -2.66543 | -1.74691 | -1.06545 | H | 4.031747 | -2.84689 | -0.83594 |
| C | -2.63432 | -0.56736 | -0.41464 | H | 4.833515 | -0.85128 | 0.120295 |
| C | -3.81696 | 0.362989 | -0.25285 | H | 2.776753 | -1.85347 | 1.611219 |
| C | -1.21678 | -0.21867 | -0.01461 | H | 3.292897 | -0.17886 | 1.93769  |
| C | -0.85826 | 0.433776 | 1.317029 | H | 2.372234 | 1.702559 | 0.841772 |
| C | 0.504122 | -0.15637 | 1.737517 | H | 4.846175 | 0.750111 | -2.1853  |
| C | 1.559889 | -0.28698 | 0.617949 | H | 3.558416 | 2.103793 | -2.08724 |
| C | 1.000745 | -1.23126 | -0.51885 | H | -4.17164 | -0.23225 | 1.821969 |
| C | -0.4481  | -1.54892 | -0.13401 | H | -3.2719  | 1.306656 | 1.64407  |
| C | 1.906872 | -2.43892 | -0.76756 | H | -5.01874 | 1.248008 | 1.288109 |
| C | 3.356574 | -1.9968  | -1.01476 | H | -2.69447 | 2.182187 | -0.57856 |
| C | 3.756954 | -0.81357 | -0.09368 | H | -4.43831 | 2.292196 | -0.97147 |
| C | 2.884889 | -0.85597 | 1.169965 | H | -3.33979 | 1.426911 | -2.08136 |
| C | 2.115168 | 1.017012 | 0.019345 | H | -0.02189 | -3.24283 | 1.176268 |
| C | 3.367625 | 0.530741 | -0.69126 | H | -1.52009 | -2.36562 | 1.57703  |
| C | 3.955558 | 1.161081 | -1.70382 | H | 0.442086 | 3.402259 | -2.6397  |
| C | -4.07536 | 0.687903 | 1.22369  | H | -0.93699 | 2.909296 | -1.6401  |
| C | -3.54659 | 1.652621 | -1.02568 | H | -0.2433  | 4.555666 | -1.43552 |
| C | -0.47492 | -2.2429  | 1.241631 | O | 0.935853 | 0.60416  | 2.80904  |
| C | 0.92082  | 2.975335 | -0.60153 | O | -0.84831 | 1.826556 | 1.179521 |
| C | -0.01608 | 3.506847 | -1.6473  | O | 0.250838 | -1.47498 | 2.18792  |
| H | -3.52818 | -2.18105 | -1.56804 | O | -4.97049 | -0.21573 | -0.82693 |
| H | -0.82161 | 0.469525 | -0.7823  | O | 1.242615 | 1.689935 | -0.86896 |
| H | -1.54164 | 0.122303 | 2.127692 | O | 1.351553 | 3.590188 | 0.331747 |
| H | 0.965535 | -0.64391 | -1.45122 | H | -5.21674 | -0.98307 | -0.29643 |
| H | 1.517265 | -3.02121 | -1.61247 | H | 1.669049 | 0.148081 | 3.240659 |
| H | 1.874183 | -3.11095 | 0.103077 | O | -0.97677 | -3.3605  | -1.68251 |
|   |          |          |          | H | -0.32807 | 2.203041 | 1.905142 |



**Figure S18** Calculated ECD of **1**.

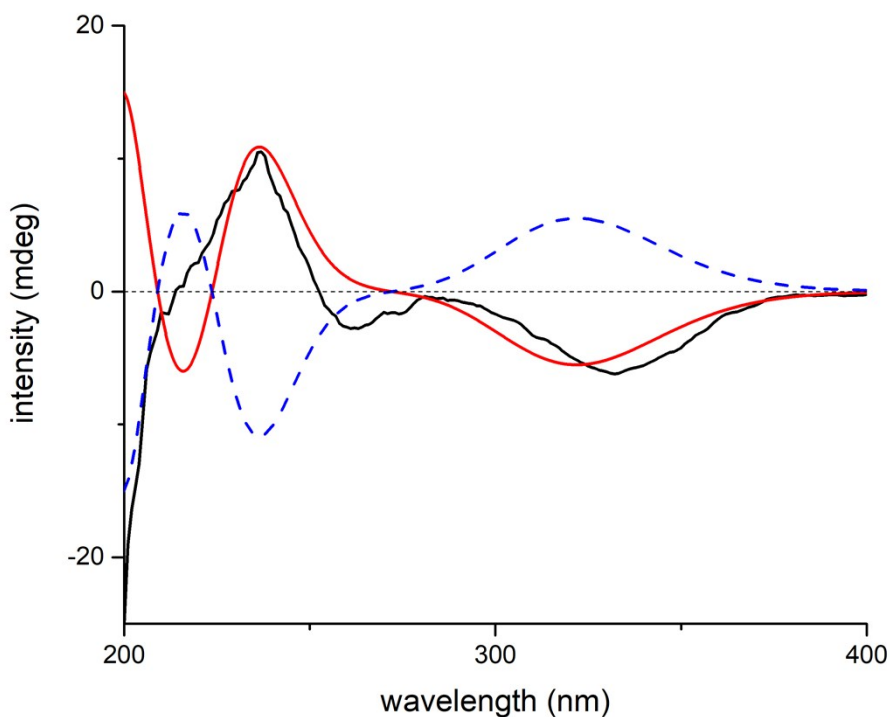

Computational Data of (5*R*, 6*S*, 7*S*, 8*S*, 9*S*, 10*S*, 13*R*, 15*R*)-**1**

Experimental ECD spectrum of **1** (black); Calculated ECD spectrum of (5*R*, 6*S*, 7*S*, 8*S*, 9*S*, 10*S*, 13*R*, 15*R*)-**1** (shift = 16 nm, red) and (5*S*, 6*R*, 7*R*, 8*R*, 9*R*, 10*R*, 13*S*, 15*S*)-**1** (shift = 16 nm, blue dash) at the CAM-B3LYP-SCRF/def2-SVP level of theory in MeOH with PCM.

Time-dependent density-functional theory (TDDFT) ECD theoretical calculations were run at the CAM-B3LYP-SCRF/def2-SVP level in MeOH with polarizable continuum model (PCM).

**Table S16** Key transitions, oscillator strengths, and rotatory strengths in the ECD spectra of conformer **1-1** at the CAM-B3LYP-SCRF/def2-SVP level in MeOH with PCM.

| <i>Num</i> <sup>a</sup> | <i>exited state</i> <sup>b</sup> | <i>CI Coefficient</i> | $\Delta E$ (eV) <sup>c</sup> | $\lambda$ (nm) <sup>d</sup> | $f^e$  | $R_{vel}^f$ | $R_{len}^g$ |
|-------------------------|----------------------------------|-----------------------|------------------------------|-----------------------------|--------|-------------|-------------|
| 1                       | 107->109                         | 0.39779               | 4.0582                       | 305.52                      | 0.0007 | -11.7803    | -11.7232    |
| □                       | 108->109                         | 0.49356               | □                            | □                           | □      | □           | □           |
| 2                       | 105->109                         | 0.63949               | 5.7945                       | 213.97                      | 0.2835 | 43.4372     | 44.8415     |
| 3                       | 105->109                         | 0.25119               | 5.8847                       | 210.69                      | 0.0346 | -37.6763    | -32.1322    |
| □                       | 106->109                         | 0.54848               | □                            | □                           | □      | □           | □           |
| 4                       | 102->111                         | 0.42                  | 6.1472                       | 201.69                      | 0.0014 | -0.6511     | -1.337      |
| □                       | 103->111                         | 0.43768               | □                            | □                           | □      | □           | □           |
| □                       | 104->111                         | -0.2411               | □                            | □                           | □      | □           | □           |
| 5                       | 102->109                         | 0.37695               | 6.2175                       | 199.41                      | 0.0070 | -17.363     | -16.9366    |
| □                       | 104->109                         | 0.43508               | □                            | □                           | □      | □           | □           |
| □                       | 106->109                         | -0.27785              | □                            | □                           | □      | □           | □           |

|    |          |          |        |        |        |          |          |
|----|----------|----------|--------|--------|--------|----------|----------|
| 6  | 103->109 | -0.24086 | 6.6186 | 187.33 | 0.0088 | 1.0015   | 0.7645   |
| □  | 107->109 | 0.44083  | □      | □      | □      | □        | □        |
| □  | 108->109 | -0.36215 | □      | □      | □      | □        | □        |
| 7  | 100->109 | -0.23858 | 6.7818 | 182.82 | 0.0153 | 2.8671   | 2.7657   |
| □  | 103->109 | 0.32934  | □      | □      | □      | □        | □        |
| □  | 104->109 | 0.30353  | □      | □      | □      | □        | □        |
| □  | 107->109 | 0.32357  | □      | □      | □      | □        | □        |
| 8  | 107->110 | 0.52289  | 6.9448 | 178.53 | 0.3565 | 61.0097  | 64.1963  |
| □  | 108->110 | -0.42863 | □      | □      | □      | □        | □        |
| 9  | 99->109  | 0.33037  | 7.0494 | 175.88 | 0.0360 | -11.8326 | -14.1221 |
| □  | 101->109 | 0.43243  | □      | □      | □      | □        | □        |
| 10 | 107->113 | 0.2637   | 7.246  | 171.11 | 0.0080 | -31.0808 | -29.7497 |
| □  | 108->113 | 0.3238   | □      | □      | □      | □        | □        |
| 11 | 100->110 | 0.23502  | 7.3298 | 169.15 | 0.0388 | -86.449  | -81.2921 |
| □  | 103->110 | 0.35631  | □      | □      | □      | □        | □        |
| □  | 104->110 | 0.40879  | □      | □      | □      | □        | □        |
| 12 | 98->109  | -0.29938 | 7.3547 | 168.58 | 0.0027 | 8.4457   | 8.0612   |
| □  | 100->109 | 0.26964  | □      | □      | □      | □        | □        |
| □  | 101->109 | 0.35256  | □      | □      | □      | □        | □        |
| 13 | 92->109  | -0.26329 | 7.4814 | 165.72 | 0.0073 | 23.2508  | 23.0823  |
| □  | 99->109  | 0.45216  | □      | □      | □      | □        | □        |
| 14 | 101->109 | -0.23875 | 7.613  | 162.86 | 0.0051 | -1.3524  | -2.261   |
| □  | 102->109 | 0.35183  | □      | □      | □      | □        | □        |
| □  | 103->109 | 0.32616  | □      | □      | □      | □        | □        |
| 15 | 107->111 | 0.52865  | 7.6197 | 162.71 | 0.0392 | -12.4088 | -13.2702 |
| □  | 108->111 | -0.32695 | □      | □      | □      | □        | □        |
| 16 | 100->109 | 0.48128  | 7.7279 | 160.44 | 0.0103 | -3.9772  | -4.0993  |
| □  | 104->109 | 0.2478   | □      | □      | □      | □        | □        |
| 17 | 106->110 | 0.43365  | 7.7877 | 159.21 | 0.0081 | -5.438   | -6.1302  |
| □  | 107->110 | -0.2532  | □      | □      | □      | □        | □        |
| □  | 108->110 | -0.37064 | □      | □      | □      | □        | □        |
| 18 | 93->109  | -0.23072 | 7.8549 | 157.84 | 0.0140 | -3.1077  | -2.4499  |
| □  | 97->109  | 0.32787  | □      | □      | □      | □        | □        |
| □  | 98->109  | 0.27192  | □      | □      | □      | □        | □        |
| □  | 103->109 | 0.27721  | □      | □      | □      | □        | □        |
| 19 | 106->110 | 0.35134  | 7.9263 | 156.42 | 0.0186 | -4.1536  | -4.8105  |
| 20 | 92->109  | -0.22464 | 7.9648 | 155.67 | 0.0020 | 3.4787   | 7.2029   |
| □  | 96->109  | 0.27079  | □      | □      | □      | □        | □        |
| 21 | 95->109  | 0.28137  | 8.0853 | 153.34 | 0.0093 | -4.8658  | -4.0914  |
| 22 | 106->111 | 0.37906  | 8.1121 | 152.84 | 0.0062 | -0.6491  | -0.2449  |
| □  | 108->111 | -0.33168 | □      | □      | □      | □        | □        |
| 23 | 103->111 | 0.33211  | 8.1981 | 151.24 | 0.0452 | 28.4493  | 20.759   |
| □  | 104->111 | 0.35589  | □      | □      | □      | □        | □        |
| 24 | 96->110  | -0.30716 | 8.2258 | 150.73 | 0.0124 | 54.2749  | 50.0021  |
| □  | 101->110 | 0.34001  | □      | □      | □      | □        | □        |
| 25 | 96->109  | 0.24658  | 8.2937 | 149.49 | 0.0014 | 4.4303   | 6.6671   |
| □  | 97->109  | 0.32695  | □      | □      | □      | □        | □        |
| □  | 106->112 | 0.23636  | □      | □      | □      | □        | □        |

|    |          |          |        |        |        |          |         |
|----|----------|----------|--------|--------|--------|----------|---------|
| 26 | 97->109  | 0.30872  | 8.322  | 148.98 | 0.0010 | -4.8784  | -6.201  |
| □  | 106->112 | -0.24362 | □      | □      | □      | □        | □       |
| 27 | 105->112 | -0.31056 | 8.4101 | 147.42 | 0.0666 | -39.362  | -37.86  |
| □  | 105->113 | 0.42144  | □      | □      | □      | □        | □       |
| 28 | 107->112 | 0.27157  | 8.4275 | 147.12 | 0.0246 | -39.4801 | -38.931 |
| □  | 107->116 | 0.25458  | □      | □      | □      | □        | □       |
| □  | 107->117 | 0.22551  | □      | □      | □      | □        | □       |
| □  | 108->116 | -0.22476 | □      | □      | □      | □        | □       |
| 29 | 102->110 | 0.26975  | 8.4692 | 146.39 | 0.0602 | 29.0587  | 24.1438 |
| □  | 103->110 | 0.33573  | □      | □      | □      | □        | □       |
| □  | 106->111 | -0.3146  | □      | □      | □      | □        | □       |
| 30 | 106->111 | 0.28992  | 8.4845 | 146.13 | 0.0268 | 39.5558  | 33.2678 |
| □  | 108->111 | 0.27684  | □      | □      | □      | □        | □       |

<sup>a</sup>Number of the excited states. <sup>b</sup>only excited states with contribution over 10% were listed. <sup>c</sup>Excitation energy. <sup>d</sup>Wavelength. <sup>e</sup>Oscillator strength. <sup>f</sup>Rotatory strength in velocity form (10-40 cgs.). <sup>g</sup>Rotatory strength in length form (10<sup>-40</sup> cgs.).

## 7.2 Computational data — Maericalysin C (3)

**Figure S19** Two possible candidates of compound **3**.

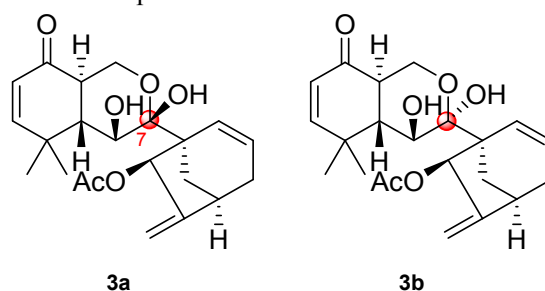

**Figure S20** Optimized geometries of 1 dominant conformers of **3a** at the M06-2X/def2-SVP level in the gas phase.

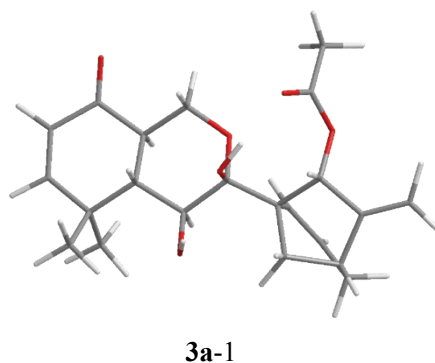

**Table S17** Important thermodynamic parameters (a.u.) of the optimized **3a** at the M06-2X/def2-SVP level in the gas phase.

| Conformers  | $U(0)^a$     | $U(T)^b$     | $H(T)^c$     | $G(T)^d$     |
|-------------|--------------|--------------|--------------|--------------|
| <b>3a-1</b> | -1304.561099 | -1304.536059 | -1304.535115 | -1304.613508 |

<sup>a</sup> $U(0)$  = electronic energy ( $\epsilon_{ele}$ ) + zero point energy (ZPE); <sup>b</sup> $U(T)$  =  $\epsilon_{ele}$  + ZPE +  $\Delta U_{0 \rightarrow T}$ ;  
<sup>c</sup> $H(T)$  =  $\epsilon_{ele}$  + ZPE +  $\Delta H_{0 \rightarrow T}$ ; <sup>d</sup> $G(T)$  =  $\epsilon_{ele}$  + ZPE +  $\Delta G_{0 \rightarrow T}$

**Table S18** Conformational analysis of the optimized **3a** at the M06-2X/def2-SVP level in the gas phase.

| Conformers  | $\Delta G(\text{kcal/mol})$ | Population |
|-------------|-----------------------------|------------|
| <b>3a-1</b> | 0.00                        | 100.00%    |

<sup>a</sup>relative  $G(T)$  in kcal/mol. <sup>b</sup>Conformational distribution calculated at the M06-2X/def2-SVP level in the gas phase. (T=298.15 K)

**Figure S21** Regression analysis of experimental versus calculated NMR chemical shifts of **3a**.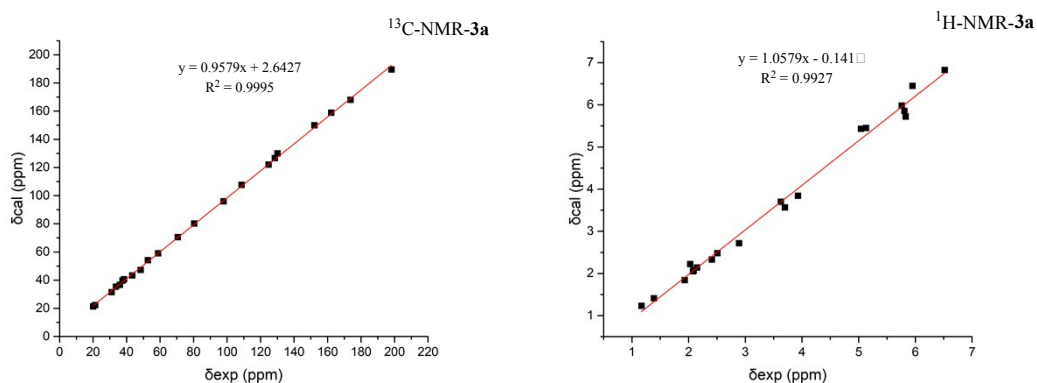**Table S19** Optimized Z-matrixes of **3a-1** in the gas phase (Å) at the M06-2X/def2-SVP level.

|   |          |          |          |   |          |          |          |
|---|----------|----------|----------|---|----------|----------|----------|
| C | 2.069    | -1.75823 | 3.2235   | H | 1.90674  | -2.44401 | 5.29793  |
| C | 1.36376  | -1.93437 | 4.51054  | H | -0.32214 | -1.56217 | 5.6699   |
| C | 0.12922  | -1.44772 | 4.6843   | H | -0.32835 | -2.09709 | 1.98167  |
| C | -0.705   | -0.74546 | 3.61873  | H | -0.67898 | 0.85085  | 1.2783   |
| C | -0.10968 | -1.03658 | 2.18853  | H | 1.04687  | 2.09262  | -0.53914 |
| C | -0.72506 | -0.21266 | 1.02643  | H | 1.68385  | 0.16567  | 2.40905  |
| C | 0.00447  | -0.44168 | -0.34475 | H | -0.0406  | 4.11355  | -1.33357 |
| C | -0.42267 | 0.6058   | -1.44212 | H | -1.4857  | 3.7108   | -3.35704 |
| C | 0.13117  | 2.01713  | -1.12098 | H | -2.51537 | 3.5261   | -1.93418 |
| C | 1.41995  | -0.874   | 2.1778   | H | -2.99702 | 1.60265  | -3.38066 |
| C | -0.45677 | 3.13889  | -1.57244 | H | -2.4163  | -0.23767 | -1.8644  |
| C | -1.66665 | 3.08817  | -2.47304 | H | -2.47935 | 1.19106  | -0.8118  |
| C | -2.01535 | 1.64484  | -2.89809 | H | -0.34814 | -0.85408 | -3.10168 |
| C | -1.9534  | 0.73648  | -1.65891 | H | 0.02237  | 0.79402  | -5.64683 |
| C | -0.02916 | 0.17722  | -2.8957  | H | -1.47326 | 1.8928   | -5.63294 |
| C | -0.92252 | 1.04772  | -3.77013 | H | -2.49605 | -1.25836 | 4.78505  |
| C | -0.78582 | 1.2546   | -5.08706 | H | -2.86023 | -0.70499 | 3.16525  |
| C | -2.14363 | -1.29245 | 3.74635  | H | -2.20671 | -2.33539 | 3.41532  |
| C | -0.72846 | 0.75463  | 3.96912  | H | 0.26194  | 1.2126   | 3.87706  |
| C | 1.97326  | -1.21633 | 0.80374  | H | -1.06411 | 0.91582  | 5.00131  |
| C | 2.12763  | -0.73349 | -3.04801 | H | -1.41785 | 1.31005  | 3.32473  |
| C | 3.55426  | -0.40736 | -3.36289 | H | 1.79584  | -2.26479 | 0.53499  |
| O | -0.3279  | -1.77141 | -0.76081 | H | 3.05894  | -1.06908 | 0.78197  |
| O | 1.34816  | 0.36786  | -3.2136  | H | 3.92069  | 0.35417  | -2.66998 |
| O | 1.73074  | -1.83523 | -2.68589 | H | 3.63631  | -0.06047 | -4.39596 |
| O | 3.17447  | -2.27398 | 3.07872  | H | 4.16523  | -1.30729 | -3.2486  |
| O | -2.10123 | -0.59066 | 0.90061  | H | 0.36451  | -2.00884 | -1.41688 |
| O | 1.42441  | -0.35438 | -0.18699 | H | -2.09029 | -1.43588 | 0.40418  |

**Figure S22** Optimized geometries of 1 dominant conformers of **3b** at the M06-2X/def2-SVP level in the gas phase.

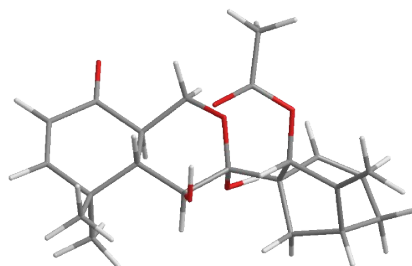

**3b-1**

**Table S20** Important thermodynamic parameters (a.u.) of the optimized **3b** at the M06-2X/def2-SVP level in the gas phase.

| Conformers  | $U(0)^a$     | $U(T)^b$     | $H(T)^c$     | $G(T)^d$     |
|-------------|--------------|--------------|--------------|--------------|
| <b>3b-1</b> | -1304.549806 | -1304.524639 | -1304.523695 | -1304.602479 |

$^aU(0)$  = electronic energy ( $\epsilon_{ele}$ ) + zero point energy (ZPE);  $^bU(T) = \epsilon_{ele} + ZPE + \Delta U_{0 \rightarrow T}$ ;

$^cH(T) = \epsilon_{ele} + ZPE + \Delta H_{0 \rightarrow T}$ ;  $^dG(T) = \epsilon_{ele} + ZPE + \Delta G_{0 \rightarrow T}$

**Table S21** Conformational analysis of the optimized **3b** at the M06-2X/def2-SVP level in the gas phase.

| Conformers  | $\Delta G(\text{kcal/mol})$ | Population |
|-------------|-----------------------------|------------|
| <b>3b-1</b> | 0.00                        | 100.00%    |

$^a$ relative  $G(T)$  in kcal/mol.  $^b$ Conformational distribution calculated at the M06-2X/def2-SVP level in the gas phase.

(T=298.15 K)

**Figure S23** Regression analysis of experimental versus calculated NMR chemical shifts of **3b**.

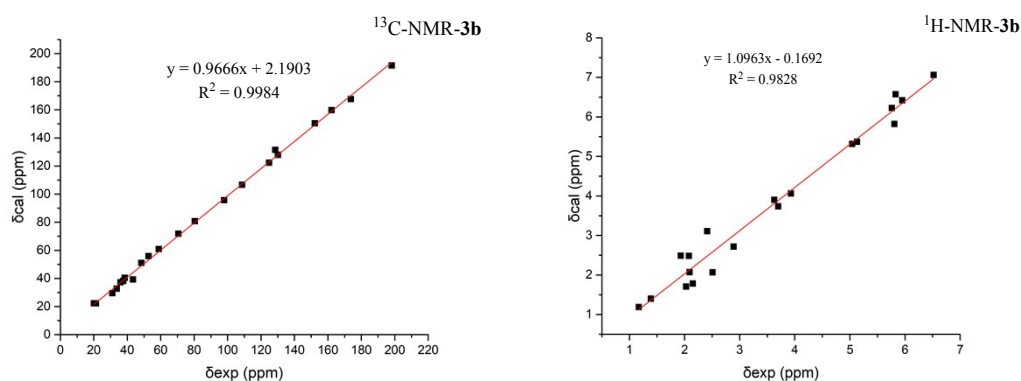

**Table S22** Optimized Z-matrixes of **3b-1** in the gas phase (Å) at the M06-2X/def2-SVP level.

|   |          |          |         |   |          |          |          |
|---|----------|----------|---------|---|----------|----------|----------|
| C | 3.37498  | 0.09173  | 2.5708  | H | 4.23661  | -1.06125 | 4.22388  |
| C | 3.31287  | -0.88162 | 3.68625 | H | 2.15958  | -2.13822 | 4.88472  |
| C | 2.15783  | -1.46906 | 4.02494 | H | 1.63639  | -1.54678 | 1.34007  |
| C | 0.83118  | -1.26162 | 3.30684 | H | -1.0109  | -0.1823  | 1.67626  |
| C | 1.10565  | -0.7286  | 1.85681 | H | 0.33351  | 2.49293  | -2.0786  |
| C | -0.17211 | -0.42685 | 1.02003 | H | 1.6553   | 1.29566  | 2.42295  |
| C | 0.01381  | 0.78186  | 0.03459 | H | -1.41527 | 3.77929  | -3.18251 |

|   |          |          |          |   |          |          |          |
|---|----------|----------|----------|---|----------|----------|----------|
| C | -1.01632 | 0.90056  | -1.15107 | H | -3.70563 | 3.14747  | -2.05893 |
| C | -0.7074  | 2.18984  | -1.98    | H | -3.47012 | 2.41485  | -3.64906 |
| C | 2.08158  | 0.45547  | 1.86233  | H | -4.30546 | 0.76609  | -1.8457  |
| C | -1.66629 | 2.89204  | -2.60786 | H | -2.76434 | 0.11539  | -0.06568 |
| C | -3.10001 | 2.42373  | -2.61715 | H | -2.6756  | 1.88459  | -0.04499 |
| C | -3.25057 | 1.02288  | -1.98583 | H | -1.28634 | -1.2634  | -1.64972 |
| C | -2.48041 | 0.99564  | -0.65624 | H | -2.39483 | -1.37299 | -4.42977 |
| C | -1.15093 | -0.29898 | -2.1411  | H | -3.95825 | -0.3809  | -4.30152 |
| C | -2.50667 | -0.03052 | -2.79805 | H | 0.64899  | -3.34185 | 2.63394  |
| C | -2.98015 | -0.62692 | -3.90105 | H | -0.0128  | -3.05633 | 4.24738  |
| C | 0.10048  | -2.61826 | 3.24812  | H | -0.90695 | -2.51569 | 2.83143  |
| C | -0.00442 | -0.29665 | 4.17175  | H | -1.0241  | -0.17984 | 3.79297  |
| C | 2.38887  | 0.91554  | 0.43365  | H | -0.09517 | -0.66867 | 5.20028  |
| C | 0.92891  | -1.17866 | -2.81208 | H | 0.44642  | 0.69933  | 4.23122  |
| C | 1.97437  | -1.09823 | -3.8811  | H | 3.2601   | 0.39098  | 0.02471  |
| O | -0.09535 | 1.96935  | 0.84866  | H | 2.64761  | 1.98135  | 0.43295  |
| O | -0.11301 | -0.36248 | -3.12075 | H | 2.80705  | -1.75915 | -3.62401 |
| O | 1.01641  | -1.88233 | -1.8126  | H | 1.55393  | -1.42253 | -4.83625 |
| O | 4.45401  | 0.61781  | 2.30588  | H | 2.35153  | -0.07499 | -3.9531  |
| O | -0.52666 | -1.65232 | 0.37861  | H | -0.21751 | 2.72256  | 0.24724  |
| O | 1.33395  | 0.71596  | -0.51085 | H | 0.20165  | -1.88491 | -0.2437  |

**Table S23** The DP4+ probabilities of **3a** and **3b**.

| Functional | Solvent | Basis Set  | Type of Data    |
|------------|---------|------------|-----------------|
| mPW1PW91   | PCM     | 6-31G(d,p) | Unscaled Shifts |

| □                | Isomer 1 ( <b>3a</b> ) | Isomer 2 ( <b>3b</b> ) |
|------------------|------------------------|------------------------|
| sDP4+ (H data)   | 100.00%                | 0.00%                  |
| sDP4+ (C data)   | 100.00%                | 0.00%                  |
| sDP4+ (all data) | 100.00%                | 0.00%                  |
| uDP4+ (H data)   | 100.00%                | 0.00%                  |
| uDP4+ (C data)   | 98.34%                 | 1.66%                  |
| uDP4+ (all data) | 100.00%                | 0.00%                  |
| DP4+ (H data)    | 100.00%                | 0.00%                  |
| DP4+ (C data)    | 100.00%                | 0.00%                  |
| DP4+ (all data)  | 100.00%                | 0.00%                  |

**Figure S24** Calculated ECD of **3a**.

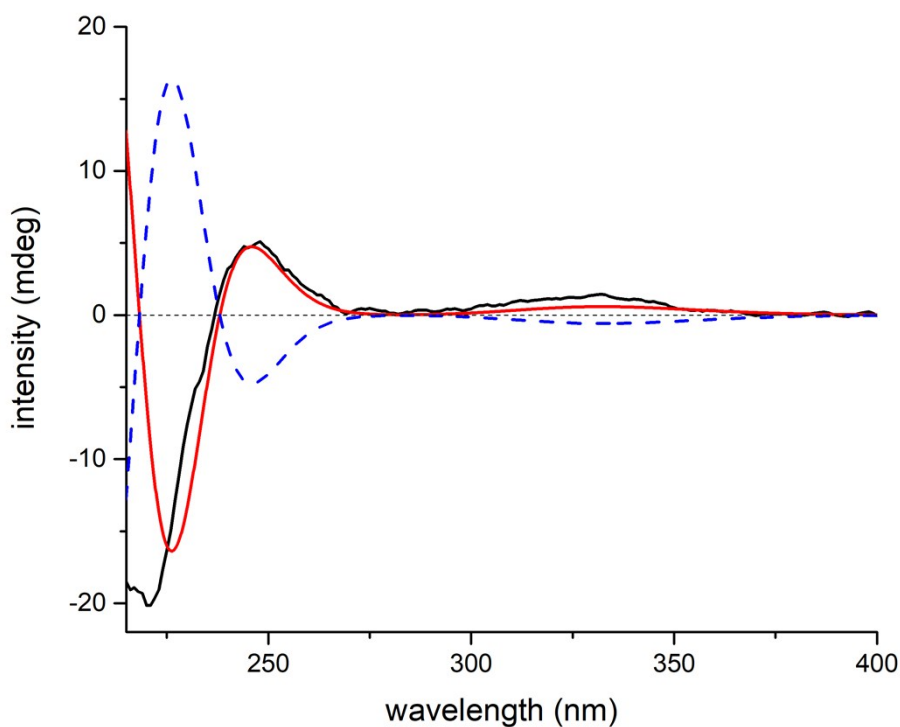

Computational Data of (5*S*, 6*S*, 7*R*, 8*S*, 10*R*, 13*R*, 15*R*) -**3** (**3a**)

Experimental ECD spectrum of **3a** (black); Calculated ECD spectrum of (5*S*, 6*S*, 7*R*, 8*S*, 10*R*, 13*R*, 15*R*) -**3a** (shift = 23 nm, red) and (5*R*, 6*R*, 7*S*, 8*R*, 10*S*, 13*S*, 15*S*) -**3a** (shift = 23 nm, blue dash) at the CAM-B3LYP-SCRF/def2-SVP level of theory in MeOH with PCM.

**Table S24** Key transitions, oscillator strengths, and rotatory strengths in the ECD spectra of conformer **3a-1** at the CAM-B3LYP-SCRF/def2-SVP level in MeOH with PCM.

| <i>Num</i> <sup>a</sup> | <i>exited state</i> <sup>b</sup> | <i>CI Coefficient</i> | $\Delta E$ (eV) <sup>c</sup> | $\lambda$ (nm) <sup>d</sup> | <i>f</i> <sup>e</sup> | <i>R</i> <sub>vel</sub> <sup>f</sup> | <i>R</i> <sub>ten</sub> <sup>g</sup> |
|-------------------------|----------------------------------|-----------------------|------------------------------|-----------------------------|-----------------------|--------------------------------------|--------------------------------------|
| 1                       | 100 ->105                        | 0.28399               | 4.0245                       | 308.07                      | 0.0001                | 1.8928                               | 4.6924                               |
| □                       | 101 ->105                        | 0.26652               | □                            | □                           | □                     | □                                    | □                                    |
| □                       | 103 ->105                        | 0.41468               | □                            | □                           | □                     | □                                    | □                                    |
| □                       | 104 ->105                        | 0.35995               | □                            | □                           | □                     | □                                    | □                                    |
| 2                       | 101 ->105                        | 0.6131                | 5.8657                       | 211.37                      | 0.2088                | 50.5148                              | 52.8094                              |
| □                       | 104 ->105                        | -0.22915              | □                            | □                           | □                     | □                                    | □                                    |
| 3                       | 100 ->105                        | 0.53699               | 6.1258                       | 202.4                       | 0.1065                | -92.1469                             | -88.6653                             |
| □                       | 104 ->105                        | -0.34028              | □                            | □                           | □                     | □                                    | □                                    |
| 4                       | 95 ->106                         | 0.28041               | 6.1691                       | 200.98                      | 0.0007                | -6.4893                              | -7.8097                              |
| □                       | 98 ->106                         | 0.49115               | □                            | □                           | □                     | □                                    | □                                    |
| 5                       | 99 ->105                         | 0.46191               | 6.6424                       | 186.65                      | 0.0067                | -4.1883                              | -3.8073                              |
| □                       | 103 ->105                        | -0.26212              | □                            | □                           | □                     | □                                    | □                                    |
| 6                       | 103 ->107                        | -0.38049              | 6.7532                       | 183.59                      | 0.0873                | 194.0213                             | 192.0839                             |
| □                       | 104 ->107                        | 0.49325               | □                            | □                           | □                     | □                                    | □                                    |
| 7                       | 99 ->105                         | 0.26631               | 6.7941                       | 182.49                      | 0.0122                | 8.1607                               | 8.1901                               |

|    |   |           |          |        |        |        |          |          |
|----|---|-----------|----------|--------|--------|--------|----------|----------|
|    | □ | 103 ->105 | 0.43852  | □      | □      | □      | □        | □        |
|    | □ | 104 ->105 | -0.37925 | □      | □      | □      | □        | □        |
| 8  |   | 103 ->108 | -0.40377 | 6.8908 | 179.93 | 0.3344 | -143.559 | -146.871 |
|    | □ | 104 ->108 | 0.55402  | □      | □      | □      | □        | □        |
| 9  |   | 93 ->105  | 0.27929  | 7.1507 | 173.39 | 0.0108 | -7.8166  | -5.1367  |
|    | □ | 96 ->105  | 0.23549  | □      | □      | □      | □        | □        |
|    | □ | 102 ->105 | 0.3276   | □      | □      | □      | □        | □        |
|    | □ | 104 ->106 | 0.26104  | □      | □      | □      | □        | □        |
| 10 |   | 102 ->107 | 0.25206  | 7.1566 | 173.25 | 0.0704 | 26.0901  | 26.2446  |
|    | □ | 104 ->106 | 0.52818  | □      | □      | □      | □        | □        |
| 11 |   | 102 ->107 | 0.56603  | 7.1925 | 172.38 | 0.3424 | 30.5414  | 37.7019  |
| 12 |   | 90 ->105  | -0.27916 | 7.2343 | 171.38 | 0.0066 | 31.4497  | 31.2083  |
|    | □ | 94 ->105  | 0.26479  | □      | □      | □      | □        | □        |
|    | □ | 97 ->105  | 0.28962  | □      | □      | □      | □        | □        |
| 13 |   | 102 ->105 | 0.45099  | 7.3345 | 169.04 | 0.024  | 13.0027  | 12.1632  |
|    | □ | 102 ->108 | 0.33647  | □      | □      | □      | □        | □        |
| 14 |   | 102 ->105 | -0.32205 | 7.3494 | 168.7  | 0.0883 | -7.2798  | -6.0363  |
|    | □ | 102 ->108 | 0.47865  | □      | □      | □      | □        | □        |
| 15 |   | 103 ->108 | 0.33092  | 7.5271 | 164.72 | 0.0011 | 1.7415   | 2.6173   |
|    | □ | 104 ->108 | 0.25058  | □      | □      | □      | □        | □        |
| 16 |   | 103 ->106 | 0.4475   | 7.5554 | 164.1  | 0.0103 | 2.0022   | 6.6172   |
| 17 |   | 97 ->105  | 0.30954  | 7.5894 | 163.37 | 0.0125 | 16.7972  | 15.787   |
| 18 |   | 94 ->107  | 0.23343  | 7.6057 | 163.02 | 0.0051 | -15.4487 | -19.2192 |
|    | □ | 96 ->107  | 0.2578   | □      | □      | □      | □        | □        |
|    | □ | 103 ->107 | 0.22746  | □      | □      | □      | □        | □        |
| 19 |   | 89 ->105  | 0.30679  | 7.6876 | 161.28 | 0.0209 | -20.0327 | -14.826  |
|    | □ | 90 ->105  | 0.27934  | □      | □      | □      | □        | □        |
| 20 |   | 102 ->106 | 0.5769   | 7.6995 | 161.03 | 0.0025 | -4.1066  | -5.3857  |
|    | □ | 103 ->106 | 0.29664  | □      | □      | □      | □        | □        |
| 21 |   | 94 ->108  | 0.24885  | 7.7623 | 159.73 | 0.0062 | -24.9921 | -27.8647 |
|    | □ | 95 ->108  | 0.37533  | □      | □      | □      | □        | □        |
|    | □ | 98 ->108  | -0.25722 | □      | □      | □      | □        | □        |
|    | □ | 102 ->108 | -0.22938 | □      | □      | □      | □        | □        |
| 22 |   | 92 ->105  | 0.3094   | 7.8971 | 157    | 0.0067 | 0.185    | 0.8269   |
|    | □ | 93 ->105  | 0.34433  | □      | □      | □      | □        | □        |
|    | □ | 98 ->105  | 0.38589  | □      | □      | □      | □        | □        |
| 23 |   | 97 ->107  | 0.2237   | 8.0025 | 154.93 | 0.0037 | -8.5559  | -10.2449 |
|    | □ | 103 ->107 | 0.29849  | □      | □      | □      | □        | □        |
|    | □ | 104 ->107 | 0.26567  | □      | □      | □      | □        | □        |
| 24 |   | 103 ->109 | -0.24862 | 8.0431 | 154.15 | 0.0027 | -5.7594  | -5.2208  |
|    | □ | 104 ->109 | 0.29216  | □      | □      | □      | □        | □        |
| 25 |   | 88 ->105  | -0.25938 | 8.1547 | 152.04 | 0.0012 | 2.0559   | 2.1498   |
|    | □ | 89 ->105  | -0.30007 | □      | □      | □      | □        | □        |
|    | □ | 96 ->105  | 0.24341  | □      | □      | □      | □        | □        |
|    | □ | 97 ->105  | 0.30761  | □      | □      | □      | □        | □        |
| 26 |   | 99 ->106  | 0.22579  | 8.2036 | 151.13 | 0.0165 | -33.7699 | -32.4979 |
|    | □ | 104 ->110 | 0.3373   | □      | □      | □      | □        | □        |
| 27 |   | 87 ->105  | -0.32942 | 8.2447 | 150.38 | 0.0136 | 1.5726   | 1.7162   |



|    |           |          |        |        |        |         |         |
|----|-----------|----------|--------|--------|--------|---------|---------|
| □  | 96 ->105  | 0.27081  | □      | □      | □      | □       | □       |
| □  | 98 ->105  | 0.42869  | □      | □      | □      | □       | □       |
| 28 | 96 ->106  | -0.24051 | 8.2575 | 150.15 | 0.0169 | 10.8727 | 11.6775 |
| □  | 97 ->108  | 0.28343  | □      | □      | □      | □       | □       |
| 29 | 97 ->108  | 0.29682  | 8.288  | 149.59 | 0.047  | 3.2532  | 5.4389  |
| 30 | 88 ->105  | -0.23062 | 8.3359 | 148.74 | 0.0089 | -7.1594 | -3.4771 |
| □  | 103 ->109 | 0.26256  | □      | □      | □      | □       | □       |
| □  | 104 ->109 | 0.29552  | □      | □      | □      | □       | □       |

<sup>a</sup>Number of the excited states. <sup>b</sup>only excited states with contribution over 10% were listed. <sup>c</sup>Excitation energy.

<sup>d</sup>Wavelength. <sup>e</sup>Oscillator strength. <sup>f</sup>Rotatory strength in velocity form (10<sup>-40</sup> cgs.). <sup>g</sup>Rotatory strength in length form (10<sup>-40</sup> cgs.).

### 7.3 Computational data — Maericalysin D (4)

Figure S25 Five possible candidates of compound 4.

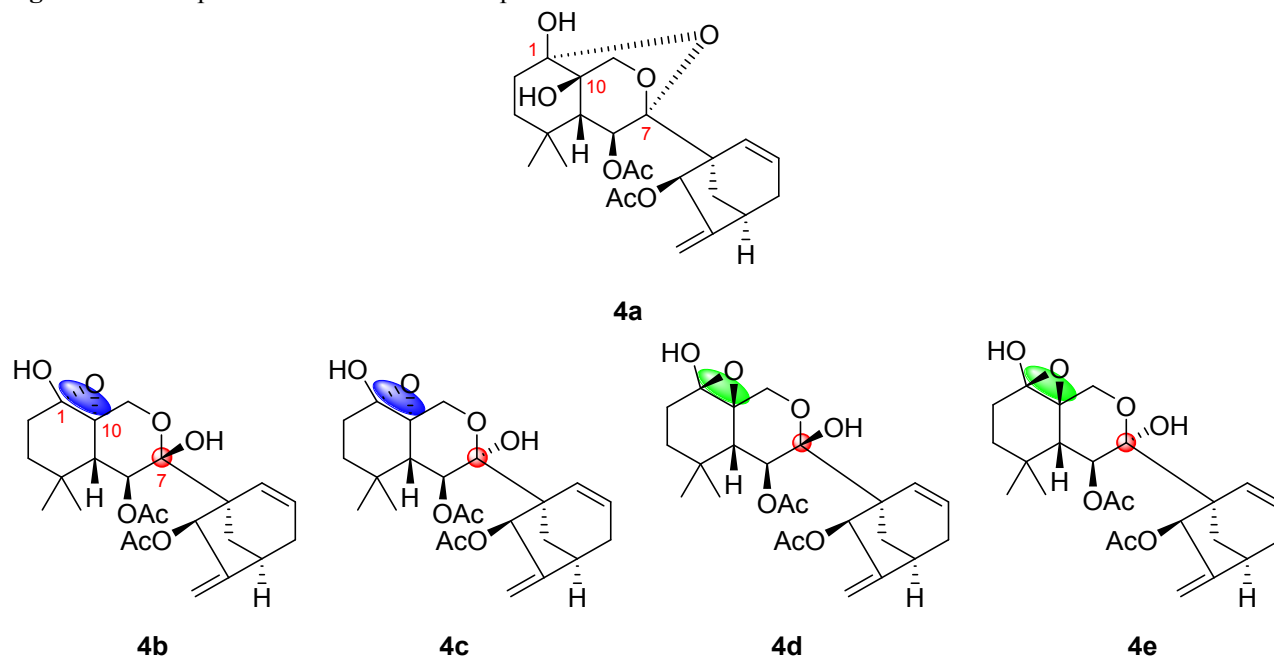

**Note:** (1) When the C-1/O/C-7 bridge is formed and located behind rings A and B, the HO-10 can only be  $\beta$ -oriented according to molecular modeling, in this case, only one possible should be considered (**4a**); (2) C-1/O/C-7 bridge can't be in front of rings A and B, for it fails to satisfy the H-5/H-20b, HO-1/H-20a restraints; (3) When the C-1/O/C-10 ether bond is formed and located behind the ring A, the uncertainty of the configurations of C-7 requires 2 diastereoisomers to be considered (**4b** and **4c**); (4) When the C-1/O/C-10 ether bond is formed and is in front of the ring A, the uncertainty of the configurations of C-7 requires 2 diastereoisomers to be considered (**4d** and **4e**).

**Figure S26** Optimized geometries of 1 dominant conformers of **4a** at the M06-2X/def2-SVP level in the gas phase.

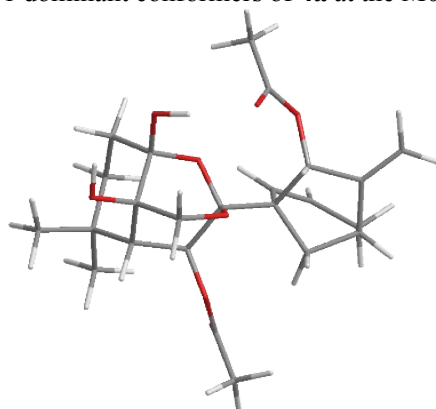

**4a-1**

**Table S25** Important thermodynamic parameters (a.u.) of the optimized **4a** at the M06-2X/def2-SVP level in the gas phase.

| Conformers  | $U(0)^a$     | $U(T)^b$     | $H(T)^c$     | $G(T)^d$     |
|-------------|--------------|--------------|--------------|--------------|
| <b>4a-1</b> | -1533.348863 | -1533.319747 | -1533.318803 | -1533.406343 |

<sup>a</sup> $U(0)$  = electronic energy ( $\epsilon_{ele}$ ) + zero point energy (ZPE); <sup>b</sup> $U(T) = \epsilon_{ele} + ZPE + \Delta U_{0 \rightarrow T}$ ;

<sup>c</sup> $H(T) = \epsilon_{ele} + ZPE + \Delta H_{0 \rightarrow T}$ ; <sup>d</sup> $G(T) = \epsilon_{ele} + ZPE + \Delta G_{0 \rightarrow T}$

**Table S26** Conformational analysis of the optimized **4a** at the M06-2X/def2-SVP level in the gas phase.

| Conformers  | $\Delta G(\text{kcal/mol})$ | Population |
|-------------|-----------------------------|------------|
| <b>4a-1</b> | 0.00                        | 100.00%    |

<sup>a</sup>relative  $G(T)$  in kcal/mol. <sup>b</sup>Conformational distribution calculated at the M06-2X/def2-SVP level in the gas phase. (T=298.15 K)

**Figure S27** Regression analysis of experimental versus calculated NMR chemical shifts of **4a**.

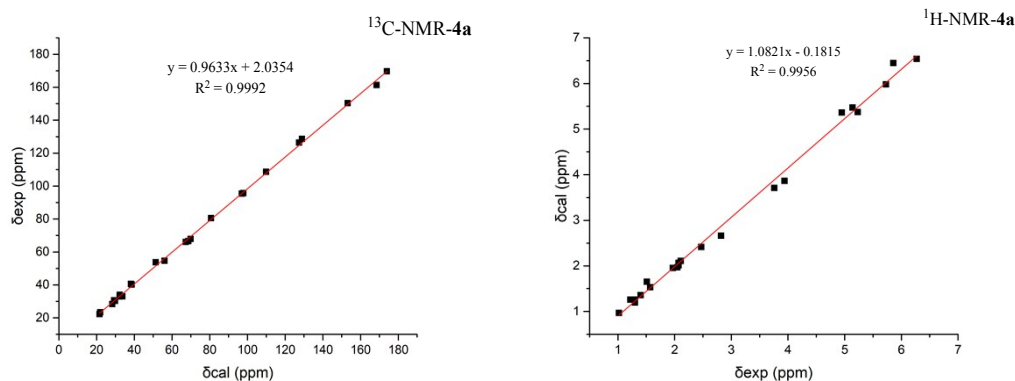

**Table S27** Optimized Z-matrixes of **4a-1** in the gas phase (Å) at the M06-2X/def2-SVP level.

|   |         |         |          |   |          |          |          |
|---|---------|---------|----------|---|----------|----------|----------|
| C | 0.55124 | 1.49856 | 1.74595  | H | -1.39049 | -4.94167 | -1.17439 |
| C | 2.05554 | 1.58962 | 2.01477  | H | -1.12645 | -3.97537 | -2.62875 |
| C | 2.88281 | 1.37683 | 0.74628  | H | -3.25717 | -3.21292 | -1.72851 |
| C | 2.42483 | 2.26398 | -0.43498 | H | -2.77269 | -0.85105 | -1.26887 |
| C | 0.85795 | 2.18315 | -0.61942 | H | -1.44002 | -1.39243 | -2.30452 |

|   |          |          |          |   |          |          |          |
|---|----------|----------|----------|---|----------|----------|----------|
| C | 0.34184  | 0.76773  | -1.05604 | H | -2.59521 | -1.14159 | 1.341    |
| C | -0.51552 | 0.13596  | 0.10619  | H | -3.61255 | -3.84152 | 2.03469  |
| C | -0.94418 | -1.34858 | -0.13242 | H | -3.98014 | -4.65373 | 0.40673  |
| C | 0.25982  | -2.28859 | -0.34463 | H | 2.60082  | 4.10536  | 0.79238  |
| C | 0.0905   | 2.52628  | 0.68672  | H | 3.97735  | 3.80429  | -0.23654 |
| C | 0.13656  | -3.45383 | -1.00356 | H | 2.47402  | 4.39671  | -0.95047 |
| C | -1.196   | -3.92492 | -1.53539 | H | 4.24193  | 2.00739  | -1.63823 |
| C | -2.3604  | -2.98699 | -1.14241 | H | 2.79326  | 2.3468   | -2.5936  |
| C | -1.91434 | -1.53246 | -1.32872 | H | 3.0692   | 0.73762  | -1.89723 |
| C | -1.85809 | -1.89113 | 1.02487  | H | -2.00381 | 2.67022  | 1.30789  |
| C | -2.63079 | -3.02069 | 0.34956  | H | -1.76706 | 2.85217  | -0.41537 |
| C | -3.45314 | -3.88425 | 0.96157  | H | -1.21766 | 2.04368  | -4.4843  |
| C | 2.88448  | 3.72305  | -0.19005 | H | -1.83789 | 0.35907  | -4.39373 |
| C | 3.16567  | 1.81075  | -1.71384 | H | -0.50327 | 0.76878  | -5.4917  |
| C | -1.41199 | 2.29986  | 0.46285  | H | 0.77895  | -2.47659 | 3.94184  |
| C | 0.04157  | 0.67774  | -3.43727 | H | -0.6912  | -3.32845 | 4.52949  |
| C | -0.95025 | 0.9845   | -4.51707 | H | -0.23631 | -1.75297 | 5.20748  |
| C | -1.06613 | -1.66254 | 3.25061  | O | 0.28386  | 3.87461  | 1.09977  |
| C | -0.24809 | -2.3571  | 4.29578  | O | 1.16023  | 0.2306   | -3.63547 |
| H | 2.34479  | 0.82769  | 2.75051  | O | -0.49621 | 0.96209  | -2.22255 |
| H | 2.30174  | 2.55336  | 2.47638  | H | -0.74891 | 1.01457  | 3.07427  |
| H | 2.81744  | 0.31834  | 0.46322  | O | -0.11023 | 1.75598  | 2.97774  |
| H | 3.94095  | 1.55951  | 0.97291  | O | -1.70943 | 0.91744  | 0.28859  |
| H | 0.58999  | 2.92373  | -1.38647 | O | 0.25535  | 0.16961  | 1.32607  |
| H | 1.17135  | 0.09454  | -1.27815 | H | 0.04497  | 3.90048  | 2.04946  |
| H | 1.21683  | -2.01668 | 0.09421  | O | -1.58115 | -0.56206 | 3.40469  |
| H | 0.99518  | -4.1072  | -1.13186 | O | -1.12423 | -2.42734 | 2.13202  |

**Figure S28** Optimized geometries of 5 dominant conformers of **4b** at the M06-2X/def2-SVP level in the gas phase.

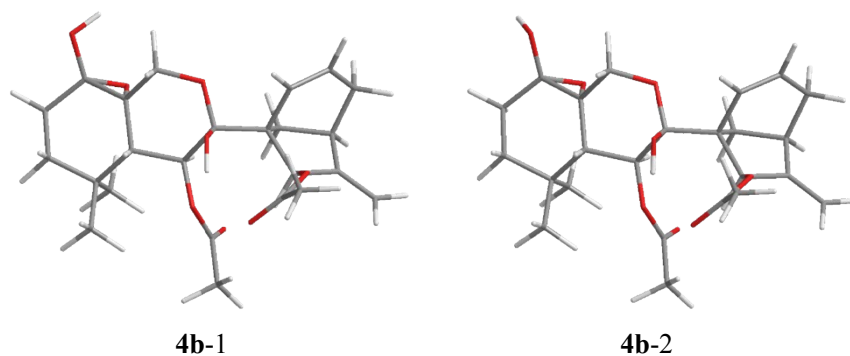

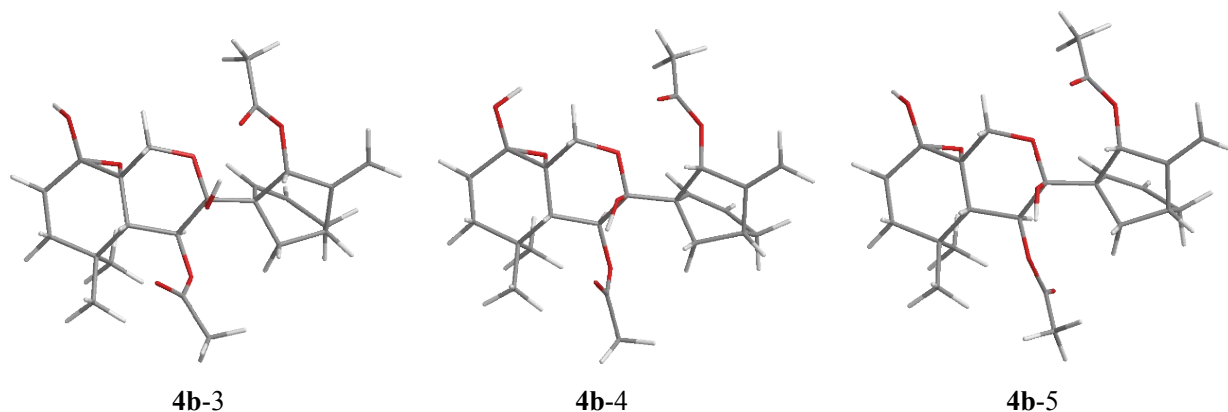

**Table S28** Important thermodynamic parameters (a.u.) of the optimized **4b** at the M06-2X/def2-SVP level in the gas phase.

| Conformers  | $U(0)^a$     | $U(T)^b$     | $H(T)^c$     | $G(T)^d$     |
|-------------|--------------|--------------|--------------|--------------|
| <b>4b-1</b> | -1533.307388 | -1533.277547 | -1533.276603 | -1533.365526 |
| <b>4b-2</b> | -1533.307120 | -1533.277289 | -1533.276345 | -1533.365341 |
| <b>4b-3</b> | -1533.305515 | -1533.276094 | -1533.275150 | -1533.362947 |
| <b>4b-4</b> | -1533.304581 | -1533.274995 | -1533.274051 | -1533.362409 |
| <b>4b-5</b> | -1533.303407 | -1533.273488 | -1533.272544 | -1533.362074 |

<sup>a</sup> $U(0)$  = electronic energy ( $\epsilon_{ele}$ ) + zero point energy (ZPE); <sup>b</sup> $U(T)$  =  $\epsilon_{ele}$  + ZPE +  $\Delta U_{0 \rightarrow T}$ ;

<sup>c</sup> $H(T)$  =  $\epsilon_{ele}$  + ZPE +  $\Delta H_{0 \rightarrow T}$ ; <sup>d</sup> $G(T)$  =  $\epsilon_{ele}$  + ZPE +  $\Delta G_{0 \rightarrow T}$

**Table S29** Conformational analysis of the optimized **4b** at the M06-2X/def2-SVP level in the gas phase.

| Conformers  | $\Delta G(\text{kcal/mol})$ | Population |
|-------------|-----------------------------|------------|
| <b>4b-1</b> | 0.00                        | 50.46%     |
| <b>4b-2</b> | 0.12                        | 41.47%     |
| <b>4b-3</b> | 1.62                        | 3.28%      |
| <b>4b-4</b> | 1.96                        | 1.85%      |
| <b>4b-5</b> | 2.17                        | 1.30%      |

<sup>a</sup>relative  $G(T)$  in kcal/mol. <sup>b</sup>Conformational distribution calculated at the M06-2X/def2-SVP level in the gas phase. (T=298.15 K)

**Figure S29** Regression analysis of experimental versus calculated NMR chemical shifts of **4b**.

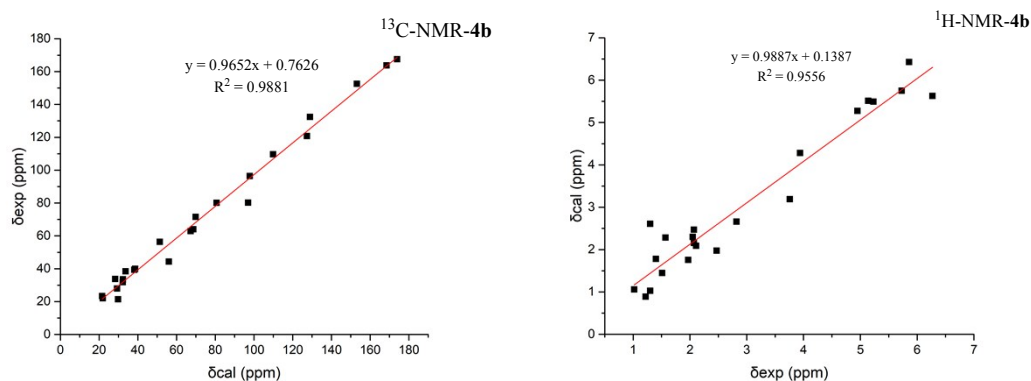

**Table S30** Optimized Z-matrixes of **4b-1** in the gas phase (Å) at the M06-2X/def2-SVP level.

|   |          |          |          |   |          |          |          |
|---|----------|----------|----------|---|----------|----------|----------|
| C | 0.41555  | -0.54145 | -4.31681 | H | -2.89248 | 4.40743  | 1.18672  |
| C | 1.73002  | -1.13502 | -4.68033 | H | -3.183   | 3.82534  | 2.82859  |
| C | 2.25566  | -2.03982 | -3.57327 | H | -0.68433 | 4.10352  | 2.16167  |
| C | 2.2628   | -1.38197 | -2.16153 | H | -1.13809 | 2.97527  | -0.2039  |
| C | 0.78011  | -1.03128 | -1.7469  | H | 0.28338  | 2.42503  | 0.6922   |
| C | 0.55422  | -0.12115 | -0.4858  | H | -0.03235 | 0.36612  | 2.45998  |
| C | -1.00416 | 0.05649  | -0.22273 | H | -0.60229 | 1.57443  | 5.02876  |
| C | -1.4494  | 1.07065  | 0.90255  | H | -0.77435 | 3.39548  | 4.71451  |
| C | -2.99402 | 1.2692   | 0.86506  | H | 3.81396  | -2.83201 | -1.60774 |
| C | -0.05101 | -0.46517 | -2.88356 | H | 3.08551  | -2.05151 | -0.22411 |
| C | -3.58183 | 2.40338  | 1.28358  | H | 2.19104  | -3.30483 | -1.09594 |
| C | -2.77459 | 3.54295  | 1.85118  | H | 2.83391  | 0.67016  | -2.74667 |
| C | -1.27457 | 3.19987  | 1.97724  | H | 3.38206  | 0.2051   | -1.14185 |
| C | -0.80997 | 2.47034  | 0.71253  | H | 4.19073  | -0.43766 | -2.56146 |
| C | -1.04359 | 0.75581  | 2.3755   | H | -1.9823  | -1.25819 | -2.37124 |
| C | -1.03008 | 2.13439  | 3.03211  | H | -2.04293 | 0.18375  | -3.37831 |
| C | -0.78647 | 2.38163  | 4.32694  | H | 2.01092  | -0.79277 | 3.34874  |
| C | 2.8644   | -2.44887 | -1.21454 | H | 3.6668   | -0.58859 | 2.70528  |
| C | 3.20939  | -0.16679 | -2.15406 | H | 2.69229  | -1.96544 | 2.182    |
| C | -1.496   | -0.29472 | -2.55945 | H | -2.5178  | -3.20529 | 3.87794  |
| C | 2.1162   | -0.07952 | 1.34217  | H | -2.79105 | -1.77323 | 4.89012  |
| C | 2.6489   | -0.91173 | 2.47031  | H | -3.72826 | -2.00672 | 3.37405  |
| C | -1.70315 | -1.40425 | 3.09388  | O | -0.55402 | -0.49849 | -5.36424 |
| C | -2.75863 | -2.13856 | 3.8606   | O | -1.6176  | 0.55912  | -1.43006 |
| H | 1.63127  | -1.7286  | -5.59716 | O | -1.56726 | -1.22814 | 0.08286  |
| H | 2.45262  | -0.3424  | -4.90672 | H | -0.93101 | -1.67472 | 0.68144  |
| H | 1.63653  | -2.94729 | -3.53936 | O | 1.16731  | -0.76747 | 0.65018  |
| H | 3.26649  | -2.36864 | -3.84756 | O | 2.45454  | 1.07354  | 1.12286  |
| H | 0.32374  | -2.00506 | -1.512   | O | 0.52137  | 0.66726  | -3.55398 |
| H | 0.9938   | 0.85864  | -0.70212 | O | -1.96829 | -0.07648 | 3.08829  |
| H | -3.59916 | 0.44503  | 0.49379  | H | -0.66304 | 0.42125  | -5.66422 |
| H | -4.66142 | 2.51132  | 1.23843  | O | -0.74694 | -1.93863 | 2.54556  |

**Table S31** Optimized Z-matrixes of **4b-2** in the gas phase (Å) at the M06-2X/def2-SVP level.

|   |          |          |          |   |          |          |          |
|---|----------|----------|----------|---|----------|----------|----------|
| C | 0.20151  | -0.53547 | -4.33908 | H | -2.70888 | 4.51244  | 1.3436   |
| C | 1.48604  | -1.16128 | -4.75741 | H | -2.93867 | 3.92556  | 2.99336  |
| C | 2.03453  | -2.0744  | -3.66889 | H | -0.46702 | 4.14201  | 2.212    |
| C | 2.12307  | -1.40919 | -2.26326 | H | -1.06011 | 3.04386  | -0.13623 |
| C | 0.67107  | -1.01185 | -1.78439 | H | 0.38543  | 2.44793  | 0.68928  |
| C | 0.53135  | -0.0961  | -0.51485 | H | 0.09224  | 0.38322  | 2.45906  |
| C | -1.00667 | 0.12383  | -0.18042 | H | -0.31697 | 1.59107  | 5.05615  |
| C | -1.37261 | 1.14005  | 0.97154  | H | -0.45202 | 3.41835  | 4.76032  |
| C | -2.91122 | 1.38066  | 1.00633  | H | 3.65142  | -2.90642 | -1.77453 |
| C | -0.19331 | -0.42285 | -2.88435 | H | 3.01995  | -2.09247 | -0.36362 |
| C | -3.44755 | 2.52706  | 1.45925  | H | 2.04137  | -3.32121 | -1.17869 |
| C | -2.58389 | 3.63991  | 1.99616  | H | 2.72706  | 0.62221  | -2.88653 |

|   |          |          |          |   |          |          |          |
|---|----------|----------|----------|---|----------|----------|----------|
| C | -1.08945 | 3.25584  | 2.04992  | H | 3.33122  | 0.1503   | -1.30414 |
| C | -0.70411 | 2.52323  | 0.76081  | H | 4.05819  | -0.52368 | -2.7533  |
| C | -0.90941 | 0.80364  | 2.42267  | H | -2.13475 | -1.13129 | -2.29831 |
| C | -0.82505 | 2.17652  | 3.08571  | H | -2.17214 | 0.32316  | -3.28814 |
| C | -0.51191 | 2.40781  | 4.36849  | H | 2.14265  | -0.81211 | 3.25069  |
| C | 2.73577  | -2.48903 | -1.33807 | H | 3.77212  | -0.66151 | 2.52952  |
| C | 3.10387  | -0.2221  | -2.30533 | H | 2.73003  | -2.00619 | 2.05517  |
| C | -1.61432 | -0.18781 | -2.49651 | H | -2.43293 | -3.12092 | 3.97198  |
| C | 2.17617  | -0.10259 | 1.24016  | H | -2.60885 | -1.68824 | 5.00456  |
| C | 2.73435  | -0.95156 | 2.34335  | H | -3.62916 | -1.88156 | 3.53729  |
| C | -1.603   | -1.34074 | 3.15694  | O | -0.82771 | -0.50041 | -5.33208 |
| C | -2.6406  | -2.04709 | 3.97275  | O | -1.65673 | 0.65511  | -1.35384 |
| H | 1.33651  | -1.75504 | -5.66716 | O | -1.592   | -1.14834 | 0.13796  |
| H | 2.21731  | -0.3869  | -5.01679 | H | -0.9507  | -1.60896 | 0.72042  |
| H | 1.39234  | -2.96379 | -3.6015  | O | 1.17712  | -0.7618  | 0.59188  |
| H | 3.02262  | -2.43293 | -3.98555 | O | 2.53869  | 1.03998  | 1.00591  |
| H | 0.19627  | -1.97129 | -1.52811 | O | 0.38406  | 0.67818  | -3.59685 |
| H | 0.98852  | 0.87101  | -0.7511  | O | -1.82456 | -0.00533 | 3.17396  |
| H | -3.55526 | 0.57722  | 0.65596  | H | -1.04189 | -1.39226 | -5.65267 |
| H | -4.52456 | 2.66562  | 1.46317  | O | -0.69481 | -1.90107 | 2.55535  |

**Figure S30** Optimized geometries of 5 dominant conformers of **4c** at the M06-2X/def2-SVP level in the gas phase.

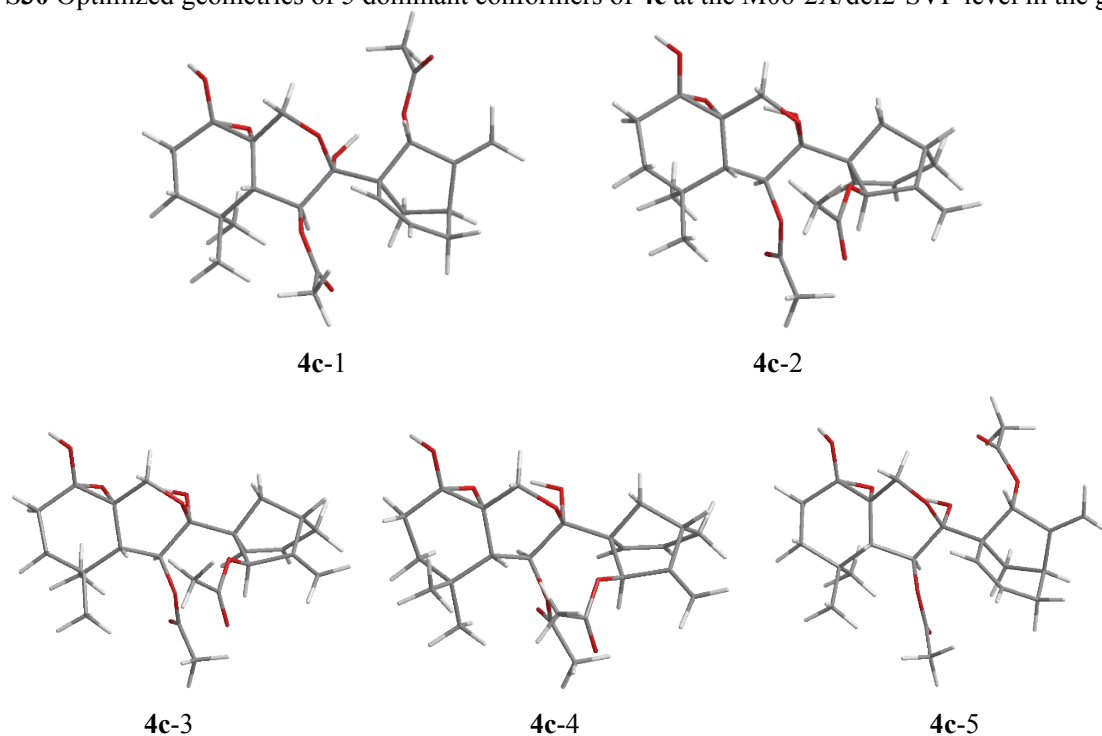

**Table S32** Important thermodynamic parameters (a.u.) of the optimized **4c** at the M06-2X/def2-SVP level in the gas phase.

| Conformers  | $U(0)^a$     | $U(T)^b$     | $H(T)^c$     | $G(T)^d$     |
|-------------|--------------|--------------|--------------|--------------|
| <b>4c-1</b> | -1533.303414 | -1533.273656 | -1533.272711 | -1533.361775 |
| <b>4c-2</b> | -1533.301881 | -1533.272054 | -1533.271110 | -1533.360532 |

|             |              |              |              |              |
|-------------|--------------|--------------|--------------|--------------|
| <b>4c-3</b> | -1533.301862 | -1533.272048 | -1533.271104 | -1533.360458 |
| <b>4c-4</b> | -1533.301205 | -1533.271647 | -1533.270703 | -1533.359130 |
| <b>4c-5</b> | -1533.300997 | -1533.271356 | -1533.270411 | -1533.358299 |

<sup>a</sup> $U(0)$  = electronic energy ( $\epsilon_{ele}$ ) + zero point energy (ZPE); <sup>b</sup> $U(T) = \epsilon_{ele} + ZPE + \Delta U_{0 \rightarrow T}$ ;  
<sup>c</sup> $H(T) = \epsilon_{ele} + ZPE + \Delta H_{0 \rightarrow T}$ ; <sup>d</sup> $G(T) = \epsilon_{ele} + ZPE + \Delta G_{0 \rightarrow T}$

**Table S33** Conformational analysis of the optimized **4c** at the M06-2X/def2-SVP level in the gas phase.

| Conformers  | $\Delta G(\text{kcal/mol})$ | Population |
|-------------|-----------------------------|------------|
| <b>4c-1</b> | 0.00                        | 60.37%     |
| <b>4c-2</b> | 0.78                        | 16.16%     |
| <b>4c-3</b> | 0.83                        | 14.94%     |
| <b>4c-4</b> | 1.66                        | 3.66%      |
| <b>4c-5</b> | 2.18                        | 1.51%      |

<sup>a</sup>relative  $G(T)$  in kcal/mol. <sup>b</sup>Conformational distribution calculated at the M06-2X/def2-SVP level in the gas phase.  
(T=298.15 K)

**Figure S31** Regression analysis of experimental versus calculated NMR chemical shifts of **4c**.

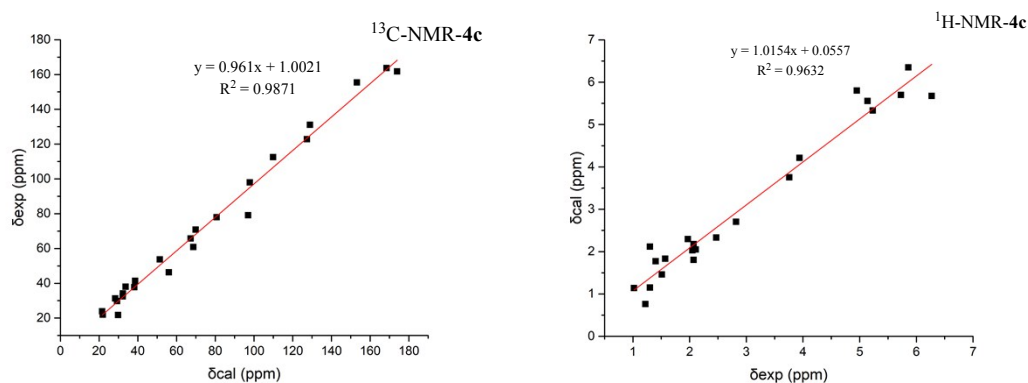

**Table S34** Optimized Z-matrixes of **4c-1** in the gas phase (Å) at the M06-2X/def2-SVP level.

|   |          |          |          |   |          |          |          |
|---|----------|----------|----------|---|----------|----------|----------|
| C | -0.38657 | 2.30811  | 3.33188  | H | -0.37756 | -3.68261 | -4.06027 |
| C | -0.21778 | 3.7818   | 3.20885  | H | 0.57957  | -2.23528 | -4.39144 |
| C | -0.65464 | 4.28146  | 1.83666  | H | 1.8894   | -3.58525 | -2.81697 |
| C | -0.02376 | 3.50218  | 0.64711  | H | 2.10376  | -2.02338 | -0.94831 |
| C | -0.47618 | 1.993    | 0.72174  | H | 1.55767  | -1.01939 | -2.29247 |
| C | 0.21783  | 0.99374  | -0.26493 | H | -1.40066 | -3.25072 | -0.19519 |
| C | 0.0293   | -0.51182 | 0.21741  | H | -0.30898 | -5.86271 | -0.65072 |
| C | -0.06919 | -1.62199 | -0.89877 | H | 0.67061  | -5.88079 | -2.22604 |
| C | -1.19069 | -1.38183 | -1.9303  | H | -0.05192 | 3.82005  | -1.53323 |
| C | -0.48515 | 1.41489  | 2.11803  | H | -0.40984 | 5.26108  | -0.60566 |
| C | -1.12823 | -1.88793 | -3.17438 | H | -1.63703 | 4.00001  | -0.76217 |
| C | 0.02076  | -2.76533 | -3.61083 | H | 1.99719  | 3.16409  | 1.47275  |
| C | 0.97271  | -3.11652 | -2.4447  | H | 1.95676  | 3.31955  | -0.28244 |
| C | 1.27153  | -1.8481  | -1.64155 | H | 1.77141  | 4.7457   | 0.72858  |
| C | -0.32599 | -3.06913 | -0.32317 | H | -2.15708 | 0.17631  | 2.594    |
| C | 0.27617  | -3.96955 | -1.39913 | H | -0.60327 | -0.56938 | 2.97258  |

|   |          |          |          |   |          |          |          |
|---|----------|----------|----------|---|----------|----------|----------|
| C | 0.21386  | -5.30819 | -1.42513 | H | 0.25712  | 1.44937  | -4.72427 |
| C | -0.56302 | 4.17555  | -0.63712 | H | -1.25617 | 1.16493  | -3.85991 |
| C | 1.50736  | 3.68462  | 0.64679  | H | -0.56456 | 2.81307  | -3.90803 |
| C | -1.12383 | 0.06804  | 2.24818  | H | 0.82482  | -3.20465 | 3.47721  |
| C | 0.45697  | 1.47048  | -2.60753 | H | 1.64488  | -4.63231 | 2.75544  |
| C | -0.33136 | 1.74749  | -3.85215 | H | 0.20333  | -4.84251 | 3.76993  |
| C | -0.19296 | -4.08309 | 1.82174  | O | -0.92237 | 1.84437  | 4.57242  |
| C | 0.6833   | -4.19294 | 3.03242  | O | -1.17872 | -0.61846 | 0.99222  |
| H | -0.81847 | 4.29117  | 3.97196  | O | 1.15333  | -0.78971 | 1.0714   |
| H | 0.82432  | 4.05953  | 3.40548  | H | 1.21005  | -1.7561  | 1.16458  |
| H | -1.7491  | 4.20747  | 1.76952  | O | -0.37946 | 1.24572  | -1.55919 |
| H | -0.41474 | 5.35019  | 1.76449  | O | 1.6778   | 1.49644  | -2.55471 |
| H | -1.54023 | 2.0112   | 0.4344   | O | 0.73609  | 1.56063  | 2.85756  |
| H | 1.29447  | 1.19184  | -0.2874  | O | 0.41104  | -3.28936 | 0.89305  |
| H | -2.0666  | -0.81933 | -1.61275 | H | -0.19278 | 1.56757  | 5.15411  |
| H | -1.93444 | -1.71402 | -3.88171 | O | -1.28007 | -4.62927 | 1.71011  |

**Table S35** Optimized Z-matrixes of **4c-2** in the gas phase (Å) at the M06-2X/def2-SVP level.

|   |          |          |          |   |          |          |          |
|---|----------|----------|----------|---|----------|----------|----------|
| C | -1.31353 | 3.50773  | 1.77723  | H | -0.34773 | -3.16708 | -4.87148 |
| C | -1.48281 | 3.35025  | 3.24855  | H | -1.47511 | -1.87386 | -5.28821 |
| C | -0.58421 | 2.24141  | 3.78736  | H | 0.71494  | -0.81884 | -5.26292 |
| C | -0.74793 | 0.88409  | 3.04381  | H | 0.45748  | 0.83723  | -3.48402 |
| C | -0.34173 | 1.0616   | 1.52974  | H | -1.20281 | 0.33761  | -3.83791 |
| C | -0.75628 | -0.08147 | 0.54048  | H | 1.10532  | -2.19171 | -1.32407 |
| C | -0.69346 | 0.42529  | -0.9658  | H | 3.24258  | -2.71923 | -3.09663 |
| C | -0.32055 | -0.66112 | -2.04588 | H | 2.64677  | -2.61201 | -4.85168 |
| C | -1.37417 | -1.79045 | -2.13086 | H | 0.08012  | -1.12972 | 3.39064  |
| C | -0.74734 | 2.39215  | 0.93476  | H | 0.0227   | -0.13002 | 4.8292   |
| C | -1.58068 | -2.48945 | -3.26088 | H | 1.25635  | 0.1748   | 3.6021   |
| C | -0.78287 | -2.22646 | -4.51401 | H | -2.92294 | 0.93297  | 2.67426  |
| C | 0.32138  | -1.16864 | -4.303   | H | -2.27742 | -0.68724 | 2.93022  |
| C | -0.23394 | -0.01516 | -3.46407 | H | -2.47428 | 0.39976  | 4.29495  |
| C | 1.11038  | -1.29615 | -1.9523  | H | 0.75688  | 3.31036  | -0.27159 |
| C | 1.41643  | -1.69026 | -3.39381 | H | -0.82687 | 3.25781  | -1.05102 |
| C | 2.49338  | -2.37531 | -3.80376 | H | 1.50732  | -2.9382  | 1.94415  |
| C | 0.20785  | -0.10726 | 3.74852  | H | 0.27667  | -4.20291 | 1.99776  |
| C | -2.18422 | 0.35812  | 3.23836  | H | 1.0432   | -3.80189 | 0.43941  |
| C | -0.14288 | 2.70014  | -0.40085 | H | 4.4523   | 0.72573  | -1.25621 |
| C | -0.38992 | -2.38025 | 1.13221  | H | 3.39575  | 1.20085  | 0.11861  |
| C | 0.6847   | -3.39317 | 1.38598  | H | 4.72215  | 0.04425  | 0.36024  |
| C | 3.03235  | -0.75043 | -0.65978 | O | -1.19737 | 4.84804  | 1.29276  |
| C | 3.95724  | 0.38479  | -0.34346 | O | 0.25438  | 1.50264  | -1.06873 |
| H | -1.22421 | 4.28542  | 3.75939  | O | -1.98673 | 0.93066  | -1.36562 |
| H | -2.5332  | 3.15184  | 3.49038  | H | -2.41999 | 1.33379  | -0.59268 |
| H | 0.46251  | 2.56729  | 3.71059  | O | 0.1521   | -1.18028 | 0.78167  |
| H | -0.79007 | 2.1175   | 4.85844  | O | -1.5859  | -2.61645 | 1.22236  |
| H | 0.75979  | 1.08471  | 1.53359  | O | -2.15825 | 2.64955  | 0.99793  |
| H | -1.79301 | -0.37535 | 0.73377  | O | 2.10033  | -0.34088 | -1.5541  |



|   |          |          |          |   |          |          |          |
|---|----------|----------|----------|---|----------|----------|----------|
| H | -1.97812 | -2.01508 | -1.25643 | H | -0.54355 | 5.35821  | 1.8001   |
| H | -2.34023 | -3.2657  | -3.29423 | O | 3.12096  | -1.86456 | -0.16348 |

**Table S36** Optimized Z-matrixes of **4c-3** in the gas phase (Å) at the M06-2X/def2-SVP level.

|   |          |          |          |   |          |          |          |
|---|----------|----------|----------|---|----------|----------|----------|
| C | 1.51833  | 3.52223  | 1.56143  | H | -2.3909  | -2.35249 | -4.74199 |
| C | 1.27849  | 3.63199  | 3.02573  | H | -2.27638 | -0.67225 | -5.27191 |
| C | 1.12353  | 2.25563  | 3.66488  | H | 0.02147  | -1.45894 | -5.16404 |
| C | 0.06026  | 1.35676  | 2.97005  | H | 0.98119  | 0.01719  | -3.46892 |
| C | 0.49825  | 1.08675  | 1.47954  | H | -0.54546 | 0.80331  | -3.89642 |
| C | -0.5811  | 0.48936  | 0.51318  | H | -0.7166  | -2.43986 | -1.15804 |
| C | -0.15843 | 0.70232  | -1.00583 | H | 0.4531   | -4.43311 | -2.78474 |
| C | -0.64411 | -0.4029  | -2.01961 | H | 0.12727  | -4.05865 | -4.57367 |
| C | -2.1862  | -0.47091 | -2.11945 | H | -0.1362  | 0.22867  | 4.84041  |
| C | 1.15187  | 2.27244  | 0.80499  | H | -0.78183 | -0.62307 | 3.45125  |
| C | -2.8104  | -0.89812 | -3.23124 | H | 0.96922  | -0.51451 | 3.68011  |
| C | -2.04261 | -1.35581 | -4.44666 | H | -1.43905 | 2.89533  | 2.46501  |
| C | -0.51647 | -1.36599 | -4.21499 | H | -2.12986 | 1.31322  | 2.82126  |
| C | -0.11004 | -0.10127 | -3.45478 | H | -1.52519 | 2.31685  | 4.12922  |
| C | -0.07517 | -1.85074 | -1.82011 | H | 2.89338  | 1.76365  | -0.32281 |
| C | -0.11714 | -2.44257 | -3.22542 | H | 1.76269  | 2.79366  | -1.20641 |
| C | 0.17128  | -3.71181 | -3.54634 | H | -1.90228 | -3.42506 | 0.67282  |
| C | 0.02612  | 0.03525  | 3.77321  | H | -2.74942 | -3.06363 | 2.19885  |
| C | -1.33124 | 2.00884  | 3.09493  | H | -0.98468 | -3.02602 | 2.1643   |
| C | 1.83066  | 1.96379  | -0.49355 | H | 3.40378  | -3.26688 | 0.64583  |
| C | -1.93715 | -1.36224 | 1.21862  | H | 3.27295  | -1.53282 | 0.2834   |
| C | -1.88341 | -2.81576 | 1.57834  | H | 3.71539  | -2.70281 | -1.00794 |
| C | 1.65855  | -2.72135 | -0.4422  | O | 2.5413   | 4.36485  | 1.03126  |
| C | 3.10865  | -2.5377  | -0.11406 | O | 1.27373  | 0.79546  | -1.09647 |
| H | 2.12187  | 4.14409  | 3.50435  | O | -0.71435 | 1.94276  | -1.49819 |
| H | 0.39547  | 4.25169  | 3.21919  | H | -0.77782 | 2.57137  | -0.75852 |
| H | 2.09577  | 1.74393  | 3.63934  | O | -0.70531 | -0.91063 | 0.85112  |
| H | 0.87537  | 2.39126  | 4.72551  | O | -2.95704 | -0.68873 | 1.2465   |
| H | 1.29931  | 0.33382  | 1.5529   | O | 0.32849  | 3.45056  | 0.76628  |
| H | -1.53029 | 1.01605  | 0.655    | O | 1.29519  | -1.83908 | -1.40454 |
| H | -2.78451 | -0.1506  | -1.2714  | H | 2.15126  | 5.19657  | 0.70925  |
| H | -3.89578 | -0.92018 | -3.27661 | O | 0.93225  | -3.54317 | 0.09879  |

**Figure S32** Optimized geometries of 4 dominant conformers of **4d** at the M06-2X/def2-SVP level in the gas phase.

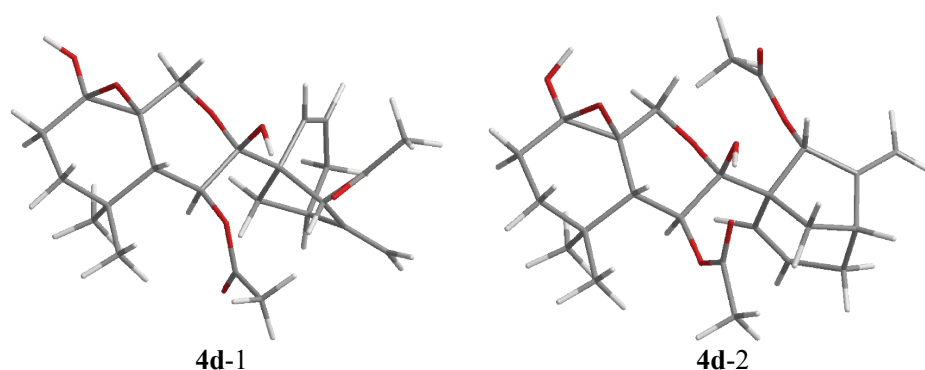

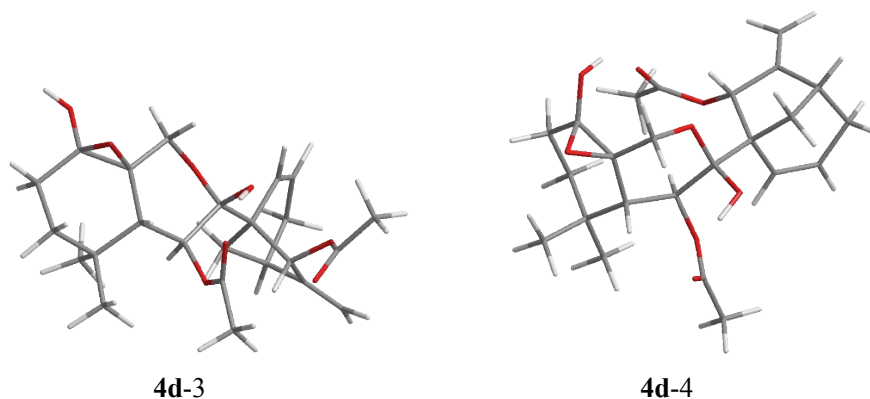

**Table S37** Important thermodynamic parameters (a.u.) of the optimized **4d** at the M06-2X/def2-SVP level in the gas phase.

| Conformers  | $U(0)^a$     | $U(T)^b$     | $H(T)^c$     | $G(T)^d$     |
|-------------|--------------|--------------|--------------|--------------|
| <b>4d-1</b> | -1533.305208 | -1533.275567 | -1533.274623 | -1533.364055 |
| <b>4d-2</b> | -1533.303564 | -1533.273909 | -1533.272965 | -1533.362131 |
| <b>4d-3</b> | -1533.303341 | -1533.273929 | -1533.272985 | -1533.361264 |
| <b>4d-4</b> | -1533.302949 | -1533.273674 | -1533.272730 | -1533.359906 |

<sup>a</sup> $U(0)$  = electronic energy ( $\epsilon_{ele}$ ) + zero point energy (ZPE); <sup>b</sup> $U(T) = \epsilon_{ele} + ZPE + \Delta U_{0 \rightarrow T}$ ;

<sup>c</sup> $H(T) = \epsilon_{ele} + ZPE + \Delta H_{0 \rightarrow T}$ ; <sup>d</sup> $G(T) = \epsilon_{ele} + ZPE + \Delta G_{0 \rightarrow T}$

**Table S38** Conformational analysis of the optimized **4d** at the M06-2X/def2-SVP level in the gas phase.

| Conformers  | $\Delta G(\text{kcal/mol})$ | Population |
|-------------|-----------------------------|------------|
| <b>4d-1</b> | 0.00                        | 81.66%     |
| <b>4d-2</b> | 1.21                        | 10.62%     |
| <b>4d-3</b> | 1.75                        | 4.23%      |
| <b>4d-4</b> | 2.60                        | 1.00%      |

<sup>a</sup>relative  $G(T)$  in kcal/mol. <sup>b</sup>Conformational distribution calculated at the M06-2X/def2-SVP level in the gas phase. (T=298.15 K)

**Figure S33** Regression analysis of experimental versus calculated NMR chemical shifts of **4d**.

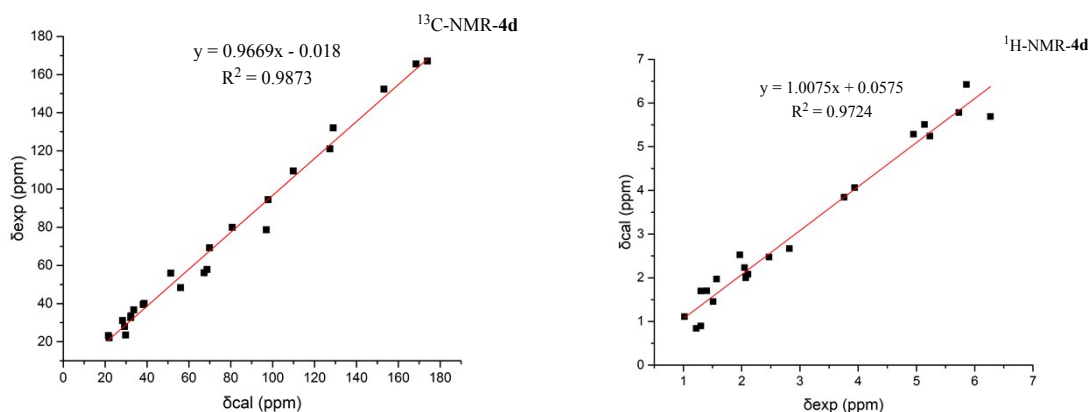

**Table S 39** Optimized Z-matrixes of **4d-1** in the gas phase ( $\text{\AA}$ ) at the M06-2X/def2-SVP level.

|   |          |           |          |   |          |          |          |
|---|----------|-----------|----------|---|----------|----------|----------|
| C | 4.072079 | -1.366659 | 0.445874 | H | -4.55065 | -2.49708 | -2.00183 |
|---|----------|-----------|----------|---|----------|----------|----------|

|   |           |           |           |   |          |          |          |
|---|-----------|-----------|-----------|---|----------|----------|----------|
| C | 5.062416  | -0.447341 | -0.216135 | H | -3.07885 | -3.12541 | -2.75217 |
| C | 4.584221  | 0.995087  | -0.133865 | H | -3.20546 | -0.73029 | -3.27473 |
| C | 3.146907  | 1.176074  | -0.659672 | H | -1.10072 | 0.067229 | -2.27165 |
| C | 2.167244  | 0.435476  | 0.304124  | H | -0.87941 | -1.71673 | -2.24952 |
| C | 0.710309  | 0.470517  | -0.208766 | H | -2.2516  | 1.22372  | -0.16623 |
| C | -0.185161 | -0.653606 | 0.356669  | H | -5.21875 | 1.135389 | -0.53238 |
| C | -1.550614 | -0.867228 | -0.34557  | H | -5.50262 | 0.268077 | -2.16486 |
| C | -2.117343 | -2.199727 | 0.129369  | H | 2.787078 | 3.103192 | 0.315388 |
| C | 2.674611  | -0.959573 | 0.694163  | H | 3.679697 | 3.198884 | -1.22322 |
| C | -2.966072 | -2.91249  | -0.612788 | H | 1.940829 | 2.91183  | -1.25185 |
| C | -3.450292 | -2.449737 | -1.961502 | H | 2.1491   | 0.980421 | -2.60117 |
| C | -2.983497 | -1.01107  | -2.236313 | H | 3.013448 | -0.48992 | -2.09137 |
| C | -1.494263 | -0.883078 | -1.882825 | H | 3.917294 | 0.927269 | -2.6816  |
| C | -2.649567 | 0.20273   | -0.107812 | H | 2.050096 | -3.02148 | 0.677652 |
| C | -3.624532 | -0.049964 | -1.25065  | H | 1.377489 | -2.02465 | 2.004249 |
| C | -4.841709 | 0.480538  | -1.321349 | H | -1.37266 | 4.451087 | -0.73233 |
| C | 2.860854  | 2.682809  | -0.699141 | H | 0.059343 | 4.371139 | 0.351925 |
| C | 3.047072  | 0.610877  | -2.085586 | H | -1.4438  | 3.570187 | 0.854291 |
| C | 1.638307  | -2.040125 | 0.936029  | H | -4.77268 | 0.214338 | 3.189203 |
| C | -0.369429 | 2.57075   | -0.684566 | H | -3.25664 | -0.48078 | 3.79671  |
| C | -0.826067 | 3.832114  | -0.01489  | H | -3.63395 | 1.232452 | 4.161936 |
| C | -2.988746 | 0.834918  | 2.167137  | O | 4.314157 | -2.71038 | 0.296863 |
| C | -3.72364  | 0.438622  | 3.414438  | O | 0.493202 | -1.8559  | 0.141446 |
| H | 6.036083  | -0.564959 | 0.289872  | O | -0.36647 | -0.46063 | 1.731897 |
| H | 5.197683  | -0.770326 | -1.258516 | H | -0.53766 | 0.484078 | 1.881841 |
| H | 4.630324  | 1.334809  | 0.912904  | O | -0.4471  | 2.326626 | -1.85892 |
| H | 5.25685   | 1.64101   | -0.718556 | O | 0.16947  | 1.726812 | 0.213077 |
| H | 2.154631  | 0.988977  | 1.257944  | O | 3.666121 | -0.94752 | 1.72153  |
| H | 0.680392  | 0.407162  | -1.300322 | O | -2.17227 | 1.722646 | 2.102245 |
| H | -1.8089   | -2.541521 | 1.118575  | H | 5.201751 | -2.89856 | 0.626767 |
| H | -3.340044 | -3.867904 | -0.234853 | O | -3.32415 | 0.058196 | 1.140572 |

**Table S40** Optimized Z-matrixes of **4d-2** in the gas phase (Å) at the M06-2X/def2-SVP level.

|   |           |           |           |   |          |          |          |
|---|-----------|-----------|-----------|---|----------|----------|----------|
| C | 3.471471  | 1.872214  | -0.111496 | H | -4.99946 | -1.69779 | 1.68246  |
| C | 4.699903  | 1.186843  | 0.410766  | H | -3.86926 | -3.04315 | 1.500906 |
| C | 4.611628  | -0.313622 | 0.182248  | H | -4.46173 | -2.27698 | -0.75661 |
| C | 3.301111  | -0.939555 | 0.700679  | H | -2.17944 | -1.66806 | -1.59682 |
| C | 2.126107  | -0.392246 | -0.166776 | H | -1.86699 | -2.58349 | -0.0821  |
| C | 0.736568  | -0.854034 | 0.31305   | H | -2.56902 | 0.848051 | -1.48967 |
| C | -0.392857 | 0.009599  | -0.297045 | H | -5.47923 | 1.482689 | -0.57713 |
| C | -1.817283 | -0.390067 | 0.128012  | H | -6.26985 | -0.20491 | -0.4021  |
| C | -1.991969 | -0.475632 | 1.630529  | H | 2.621832 | -2.99879 | 1.042647 |
| C | 2.197708  | 1.139259  | -0.334491 | H | 3.492973 | -2.75554 | -0.50151 |
| C | -2.972334 | -1.202936 | 2.174635  | H | 4.384441 | -2.78652 | 1.036274 |
| C | -3.982798 | -1.955282 | 1.344903  | H | 2.321686 | -1.20998 | 2.640474 |
| C | -3.832029 | -1.612942 | -0.14888  | H | 2.816114 | 0.468229 | 2.316481 |
| C | -2.340266 | -1.689193 | -0.508668 | H | 4.03284  | -0.75978 | 2.741992 |
| C | -2.849237 | 0.620148  | -0.449725 | H | 1.073931 | 2.852921 | 0.34447  |

|   |           |           |           |   |          |          |          |
|---|-----------|-----------|-----------|---|----------|----------|----------|
| C | -4.156048 | -0.148048 | -0.383162 | H | 0.661442 | 2.289016 | -1.3096  |
| C | -5.363718 | 0.403014  | -0.460787 | H | 0.472386 | -4.88089 | -1.78013 |
| C | 3.447182  | -2.460925 | 0.560204  | H | -0.24919 | -4.68024 | -0.13755 |
| C | 3.101905  | -0.58645  | 2.180137  | H | 1.513461 | -4.71415 | -0.32409 |
| C | 0.916753  | 1.967661  | -0.288775 | H | -3.17998 | 4.078116 | 1.380352 |
| C | 0.600998  | -2.908609 | -0.982845 | H | -1.46812 | 3.660135 | 1.582549 |
| C | 0.576234  | -4.398564 | -0.803849 | H | -1.92566 | 4.932556 | 0.39727  |
| C | -2.310597 | 2.917361  | -0.205277 | O | 3.46868  | 3.21536  | 0.18822  |
| C | -2.223872 | 3.982785  | 0.851502  | O | -0.16522 | 1.275319 | 0.284885 |
| H | 5.572011  | 1.620864  | -0.101215 | O | -0.30746 | 0.126222 | -1.67507 |
| H | 4.800747  | 1.431483  | 1.478315  | H | 0.0965   | -0.67885 | -2.0451  |
| H | 4.699546  | -0.522601 | -0.896294 | O | 0.649499 | -2.35432 | -2.05581 |
| H | 5.459702  | -0.811368 | 0.676958  | O | 0.559737 | -2.2761  | 0.186522 |
| H | 2.264131  | -0.777349 | -1.189546 | O | 3.068862 | 1.540772 | -1.40248 |
| H | 0.643819  | -0.701797 | 1.393635  | O | -1.88332 | 3.010991 | -1.32085 |
| H | -1.327155 | 0.122409  | 2.258436  | H | 2.951176 | 3.67224  | -0.48689 |
| H | -3.078667 | -1.239422 | 3.26218   | O | -2.92607 | 1.825282 | 0.286038 |

**Table S41** Optimized Z-matrixes of **4d-3** in the gas phase (Å) at the M06-2X/def2-SVP level.

|   |           |           |           |   |          |          |          |
|---|-----------|-----------|-----------|---|----------|----------|----------|
| C | -3.991552 | -1.119807 | -0.861622 | H | 4.554773 | -3.23485 | 0.900061 |
| C | -4.958004 | -0.702278 | 0.214325  | H | 3.06423  | -4.13847 | 1.193995 |
| C | -4.492577 | 0.578791  | 0.89297   | H | 3.120083 | -2.26991 | 2.784011 |
| C | -3.026395 | 0.500621  | 1.361583  | H | 1.04711  | -1.09883 | 2.177072 |
| C | -2.117506 | 0.446739  | 0.0942    | H | 0.859408 | -2.65464 | 1.304525 |
| C | -0.619473 | 0.29833   | 0.470899  | H | 2.207741 | 0.892577 | 0.977376 |
| C | 0.285337  | -0.455917 | -0.535301 | H | 5.235174 | 0.633843 | 1.285602 |
| C | 1.602643  | -1.004627 | 0.059931  | H | 5.479413 | -0.90961 | 2.315495 |
| C | 2.217688  | -1.957758 | -0.957985 | H | -1.71128 | 1.748692 | 2.595008 |
| C | -2.615214 | -0.588664 | -0.924467 | H | -2.85412 | 2.66532  | 1.576824 |
| C | 3.043703  | -2.941519 | -0.597971 | H | -3.43463 | 1.821803 | 3.033142 |
| C | 3.456695  | -3.1715   | 0.831994  | H | -1.92191 | -0.6839  | 2.848045 |
| C | 2.95114   | -2.02849  | 1.725685  | H | -2.78828 | -1.66876 | 1.648349 |
| C | 1.475123  | -1.749563 | 1.398691  | H | -3.67836 | -0.83816 | 2.949455 |
| C | 2.667267  | 0.055496  | 0.431822  | H | -1.96712 | -2.34685 | -1.98582 |
| C | 3.616431  | -0.71921  | 1.334029  | H | -1.28655 | -0.80841 | -2.58538 |
| C | 4.837013  | -0.309639 | 1.666317  | H | 0.390463 | 4.715681 | 0.261362 |
| C | -2.7315   | 1.756445  | 2.188693  | H | 1.186887 | 3.677416 | 1.493963 |
| C | -2.838527 | -0.743776 | 2.243831  | H | -0.54281 | 4.088542 | 1.66899  |
| C | -1.564222 | -1.374764 | -1.682467 | H | 4.616382 | 1.590278 | -2.60246 |
| C | -0.115462 | 2.658614  | 0.157456  | H | 2.943513 | 1.530903 | -3.19661 |
| C | 0.258543  | 3.874077  | 0.946988  | H | 3.640208 | 3.11256  | -2.71167 |
| C | 3.07962   | 1.805132  | -1.11776  | O | -4.20542 | -2.3671  | -1.39596 |
| C | 3.622229  | 2.040074  | -2.496583 | O | -0.43878 | -1.61751 | -0.87927 |
| H | -5.950673 | -0.560796 | -0.246185 | O | 0.605162 | 0.29598  | -1.65984 |
| H | -5.049439 | -1.528513 | 0.934055  | H | 0.081829 | 1.118695 | -1.68379 |
| H | -4.600207 | 1.422625  | 0.193227  | O | -0.47488 | 2.666632 | -0.99584 |
| H | -5.134075 | 0.792437  | 1.761867  | O | -0.05466 | 1.547104 | 0.905407 |
| H | -2.242006 | 1.402387  | -0.432995 | O | -3.65723 | -0.10785 | -1.77301 |

|   |           |           |           |   |          |          |          |
|---|-----------|-----------|-----------|---|----------|----------|----------|
| H | -0.579749 | -0.314596 | 1.374313  | O | 2.470605 | 2.614249 | -0.46743 |
| H | 1.965739  | -1.789548 | -2.005793 | H | -5.09623 | -2.39022 | -1.76762 |
| H | 3.454385  | -3.606884 | -1.361965 | O | 3.346708 | 0.562037 | -0.70507 |

**Table S42** Optimized Z-matrixes of **4d-4** in the gas phase (Å) at the M06-2X/def2-SVP level.

|   |           |           |           |   |          |          |          |
|---|-----------|-----------|-----------|---|----------|----------|----------|
| C | -2.432668 | -1.900384 | -0.979547 | H | 5.546747 | 0.42828  | 0.826291 |
| C | -2.990561 | -2.216785 | 0.395     | H | 5.349085 | 1.690514 | -0.39524 |
| C | -2.734093 | -1.10572  | 1.410018  | H | 5.021595 | -0.48245 | -1.51075 |
| C | -2.977433 | 0.326096  | 0.903623  | H | 2.704594 | -0.12531 | -2.38986 |
| C | -2.036884 | 0.614131  | -0.312497 | H | 3.184118 | 1.51054  | -1.85739 |
| C | -0.560878 | 0.892272  | 0.095993  | H | 1.638148 | -1.70033 | -0.80143 |
| C | 0.558949  | 0.7504    | -1.001151 | H | 3.709451 | -3.03823 | 1.140116 |
| C | 1.95518   | 0.403474  | -0.419966 | H | 5.344265 | -2.38325 | 0.515398 |
| C | 2.406204  | 1.286109  | 0.732813  | H | -4.61592 | 1.571977 | 0.2055   |
| C | -2.023217 | -0.521378 | -1.326101 | H | -4.708   | -0.0995  | -0.38948 |
| C | 3.70132   | 1.509579  | 0.977507  | H | -5.10972 | 0.271009 | 1.312647 |
| C | 4.809423  | 0.901937  | 0.158316  | H | -1.73558 | 1.169057 | 2.522665 |
| C | 4.240391  | -0.13834  | -0.819347 | H | -3.47885 | 1.071169 | 2.864859 |
| C | 3.025325  | 0.476635  | -1.528437 | H | -2.86618 | 2.331233 | 1.777958 |
| C | 2.119089  | -1.085587 | -0.030774 | H | -1.06109 | -1.17251 | -3.12073 |
| C | 3.623129  | -1.289818 | -0.043298 | H | -1.19988 | 0.608393 | -2.97062 |
| C | 4.257231  | -2.287202 | 0.565872  | H | -1.01144 | 5.360594 | 0.874426 |
| C | -4.440719 | 0.518544  | 0.473576  | H | 0.488406 | 4.532265 | 1.418824 |
| C | -2.735586 | 1.280622  | 2.080842  | H | -1.04744 | 4.164173 | 2.227361 |
| C | -1.011735 | -0.33217  | -2.421303 | H | 0.15216  | -1.75275 | 3.314285 |
| C | -0.827486 | 3.32303   | 0.271052  | H | -0.63918 | -3.28567 | 2.776472 |
| C | -0.594428 | 4.426795  | 1.262506  | H | 1.110199 | -3.23608 | 3.176109 |
| C | 0.604801  | -2.355255 | 1.306756  | O | -1.90614 | -2.95833 | -1.67503 |
| C | 0.270644  | -2.678367 | 2.737069  | O | 0.267655 | -0.33507 | -1.84077 |
| H | -4.068752 | -2.406131 | 0.276661  | O | 0.711516 | 1.923209 | -1.72606 |
| H | -2.531886 | -3.152523 | 0.742979  | H | -0.13564 | 2.383789 | -1.82335 |
| H | -3.350642 | -1.273242 | 2.307686  | O | -1.30921 | 3.47565  | -0.82445 |
| H | -1.687619 | -1.171423 | 1.750954  | O | -0.41533 | 2.154297 | 0.767083 |
| H | -2.420908 | 1.501539  | -0.837563 | O | -3.25397 | -1.07443 | -1.7586  |
| H | -0.294647 | 0.170297  | 0.882136  | O | 0.085522 | -2.86886 | 0.347195 |
| H | 1.65513   | 1.717768  | 1.393307  | H | -1.11043 | -3.22739 | -1.18945 |
| H | 3.982635  | 2.145674  | 1.82128   | O | 1.563855 | -1.43061 | 1.23898  |

**Figure S34** Optimized geometries of 6 dominant conformers of **4e** at the M06-2X/def2-SVP level in the gas phase.

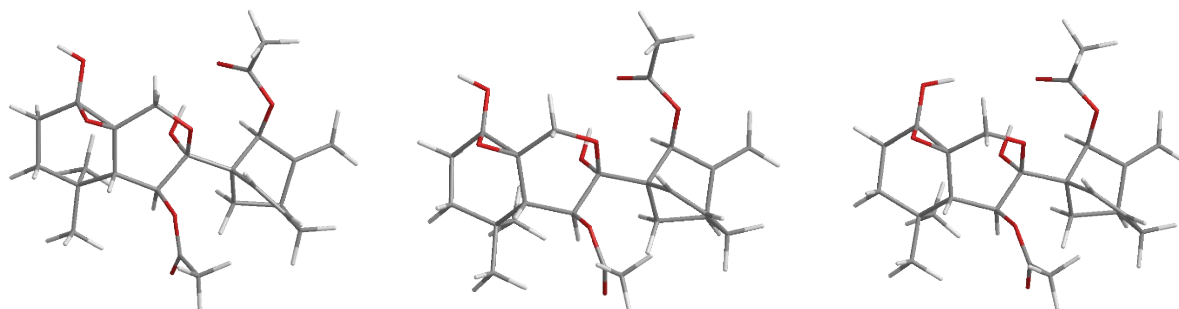

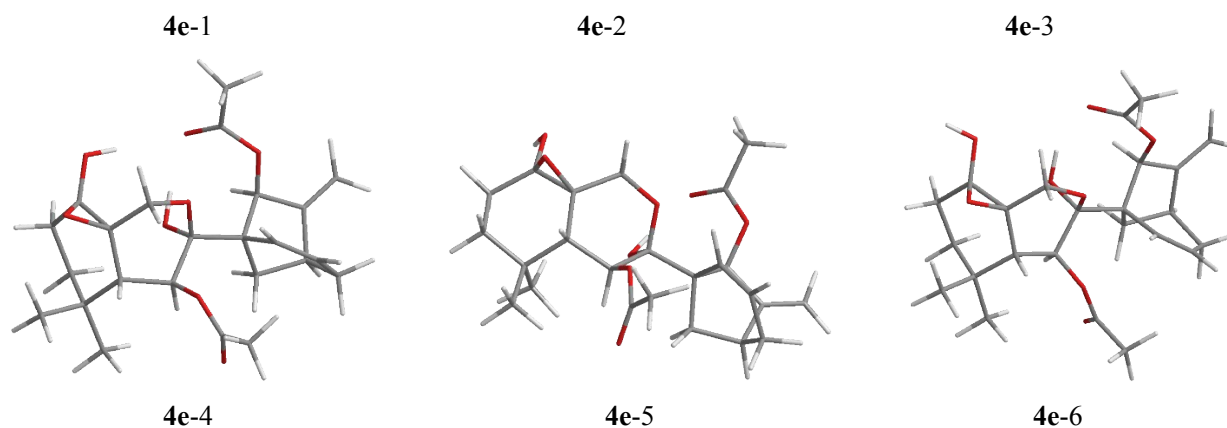

**Table S43** Important thermodynamic parameters (a.u.) of the optimized **4e** at the M06-2X/def2-SVP level in the gas phase.

| <i>Conformers</i> | $U(0)^a$     | $U(T)^b$     | $H(T)^c$     | $G(T)^d$     |
|-------------------|--------------|--------------|--------------|--------------|
| <b>4e-1</b>       | -1533.313715 | -1533.284318 | -1533.283374 | -1533.371180 |
| <b>4e-2</b>       | -1533.313262 | -1533.284276 | -1533.283332 | -1533.370828 |
| <b>4e-3</b>       | -1533.312297 | -1533.282638 | -1533.281694 | -1533.370527 |
| <b>4e-4</b>       | -1533.312370 | -1533.282894 | -1533.281950 | -1533.370245 |
| <b>4e-5</b>       | -1533.311674 | -1533.282057 | -1533.281113 | -1533.369557 |
| <b>4e-6</b>       | -1533.311382 | -1533.281931 | -1533.280987 | -1533.368226 |

<sup>a</sup> $U(0)$  = electronic energy ( $\epsilon_{ele}$ ) + zero point energy (ZPE); <sup>b</sup> $U(T) = \epsilon_{ele} + ZPE + \Delta U_{0 \rightarrow T}$ ;

<sup>c</sup> $H(T) = \epsilon_{ele} + ZPE + \Delta H_{0 \rightarrow T}$ ; <sup>d</sup> $G(T) = \epsilon_{ele} + ZPE + \Delta G_{0 \rightarrow T}$

**Table S44** Conformational analysis of the optimized **4e** at the M06-2X/def2-SVP level in the gas phase.

| <i>Conformers</i> | $\Delta G(\text{kcal/mol})$ | <i>Population</i> |
|-------------------|-----------------------------|-------------------|
| <b>4e-1</b>       | 0.00                        | 35.86%            |
| <b>4e-2</b>       | 0.22                        | 24.69%            |
| <b>4e-3</b>       | 0.41                        | 17.94%            |
| <b>4e-4</b>       | 0.59                        | 13.31%            |
| <b>4e-5</b>       | 1.02                        | 6.42%             |
| <b>4e-6</b>       | 1.85                        | 1.56%             |

<sup>a</sup>relative  $G(T)$  in kcal/mol. <sup>b</sup>Conformational distribution calculated at the M06-2X/def2-SVP level in the gas phase. (T=298.15 K)

**Figure S35** Regression analysis of experimental versus calculated NMR chemical shifts of **4e**.

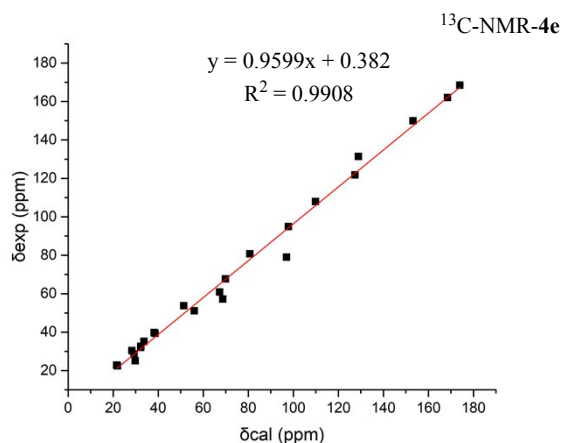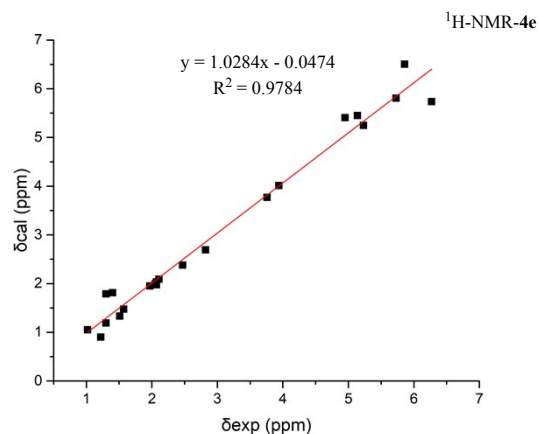

**Table S45** Optimized Z-matrixes of **4e-1** in the gas phase (Å) at the M06-2X/def2-SVP level.

|   |           |           |           |   |          |          |          |
|---|-----------|-----------|-----------|---|----------|----------|----------|
| C | -3.614049 | -1.526459 | -0.308407 | H | 5.180841 | 1.752939 | -0.11635 |
| C | -4.685245 | -0.904286 | 0.547894  | H | 3.972473 | 3.012157 | 0.169778 |
| C | -4.560421 | 0.613809  | 0.548126  | H | 4.080774 | 1.570719 | 2.177039 |
| C | -3.139776 | 1.097138  | 0.895331  | H | 1.672899 | 0.883743 | 2.267573 |
| C | -2.173713 | 0.646348  | -0.235681 | H | 1.685984 | 2.219851 | 1.083147 |
| C | -0.701279 | 1.039308  | 0.018447  | H | 2.136374 | -1.40178 | 1.636133 |
| C | 0.225299  | -0.177413 | 0.147933  | H | 5.163974 | -2.00635 | 0.981992 |
| C | 1.725988  | 0.18697   | 0.210967  | H | 5.980408 | -0.39221 | 1.46324  |
| C | 2.279378  | 0.660869  | -1.122908 | H | -2.16519 | 3.057205 | 1.124008 |
| C | -2.37996  | -0.808872 | -0.668956 | H | -3.82278 | 2.968064 | 1.762439 |
| C | 3.34854   | 1.460434  | -1.194364 | H | -3.54919 | 3.044388 | 0.005556 |
| C | 4.102037  | 1.924805  | 0.026537  | H | -3.50349 | 0.770095 | 3.006608 |
| C | 3.61508   | 1.163052  | 1.269742  | H | -2.56818 | -0.54672 | 2.234463 |
| C | 2.076619  | 1.216626  | 1.298987  | H | -1.78305 | 0.985006 | 2.611084 |
| C | 2.596279  | -0.990586 | 0.724162  | H | -1.15216 | -2.56203 | -0.37766 |
| C | 3.901325  | -0.320175 | 1.09548   | H | -1.31015 | -2.01563 | -2.0655  |
| C | 5.074559  | -0.938027 | 1.189186  | H | 1.430485 | 3.225788 | -2.55174 |
| C | -3.162958 | 2.62836   | 0.949698  | H | -0.26006 | 3.547624 | -2.98571 |
| C | -2.72527  | 0.539716  | 2.261619  | H | 0.680482 | 4.791822 | -2.07674 |
| C | -1.177384 | -1.675896 | -1.030653 | H | 1.666843 | -3.49717 | -2.22646 |
| C | 0.079537  | 3.103341  | -0.919802 | H | 3.194381 | -4.11598 | -1.56266 |
| C | 0.507143  | 3.721316  | -2.220438 | H | 1.630622 | -4.93657 | -1.15946 |
| C | 1.926047  | -3.061428 | -0.186917 | O | -3.51992 | -2.89719 | -0.24579 |
| C | 2.127354  | -3.981132 | -1.352224 | O | 0.064313 | -1.00084 | -0.98155 |
| H | -4.5975   | -1.316734 | 1.563203  | O | -0.19651 | -0.81895 | 1.308906 |
| H | -5.668679 | -1.213384 | 0.153468  | H | 0.173182 | -1.7222  | 1.307907 |
| H | -5.270459 | 1.046188  | 1.270117  | O | -0.25186 | 1.814868 | -1.09386 |
| H | -4.833543 | 0.996845  | -0.447996 | O | 0.043538 | 3.669879 | 0.139961 |
| H | -2.461331 | 1.220956  | -1.129959 | O | -3.4736  | -0.96112 | -1.58372 |
| H | -0.610565 | 1.641757  | 0.929888  | O | 2.784765 | -2.04107 | -0.21026 |
| H | 1.775321  | 0.307775  | -2.023069 | H | -4.38411 | -3.27207 | -0.45674 |
| H | 3.716702  | 1.77935   | -2.173975 | O | 1.075257 | -3.20687 | 0.659283 |

**Table S46** Optimized Z-matrixes of **4e-2** in the gas phase (Å) at the M06-2X/def2-SVP level.

|   |           |           |           |   |          |          |          |
|---|-----------|-----------|-----------|---|----------|----------|----------|
| C | -3.395497 | -1.618126 | -0.197086 | H | 5.125388 | 1.7583   | 0.235068 |
| C | -4.355606 | -1.140188 | 0.86443   | H | 3.903546 | 3.009593 | 0.501546 |
| C | -4.473947 | 0.381106  | 0.836348  | H | 3.863869 | 1.472665 | 2.436134 |
| C | -3.110823 | 1.081714  | 0.979338  | H | 1.451682 | 0.799166 | 2.317052 |
| C | -2.221659 | 0.707518  | -0.245221 | H | 1.561123 | 2.185184 | 1.189664 |
| C | -0.737305 | 1.0827    | -0.074406 | H | 1.953984 | -1.46957 | 1.602582 |
| C | 0.164258  | -0.158682 | 0.055855  | H | 5.024098 | -2.05132 | 1.164085 |
| C | 1.657945  | 0.19365   | 0.240262  | H | 5.80455  | -0.46613 | 1.781838 |
| C | 2.30306   | 0.733241  | -1.024804 | H | -2.35344 | 3.133733 | 0.951117 |
| C | -2.372806 | -0.72158  | -0.752268 | H | -3.88876 | 2.93113  | 1.830707 |
| C | 3.372385  | 1.534717  | -0.979948 | H | -3.87407 | 2.902498 | 0.048988 |
| C | 4.039977  | 1.930242  | 0.312761  | H | -3.23075 | 0.938538 | 3.128736 |
| C | 3.464932  | 1.109959  | 1.479153  | H | -2.2419  | -0.36177 | 2.397769 |
| C | 1.929123  | 1.170936  | 1.397176  | H | -1.58746 | 1.267152 | 2.552235 |
| C | 2.486263  | -1.011913 | 0.754524  | H | -1.29634 | -2.38382 | -1.57998 |
| C | 3.75981   | -0.365688 | 1.257971  | H | -1.32774 | -0.90013 | -2.57875 |
| C | 4.921386  | -0.993152 | 1.413191  | H | -0.19743 | 3.408581 | -3.20108 |
| C | -3.31787  | 2.600323  | 0.949892  | H | 0.720922 | 4.699854 | -2.33344 |
| C | -2.503934 | 0.699345  | 2.336311  | H | 1.483343 | 3.115911 | -2.70593 |
| C | -1.209569 | -1.288681 | -1.554317 | H | 1.786208 | -3.39564 | -2.37337 |
| C | 0.096688  | 3.07149   | -1.105111 | H | 3.282023 | -4.00622 | -1.63252 |
| C | 0.549233  | 3.623474  | -2.426619 | H | 1.715082 | -4.87752 | -1.36971 |
| C | 1.897361  | -3.039547 | -0.303863 | O | -3.14503 | -2.96496 | -0.22437 |
| C | 2.200211  | -3.904201 | -1.49009  | O | 0.087791 | -0.93394 | -1.10722 |
| H | -4.014914 | -1.508984 | 1.84213   | O | -0.33022 | -0.86668 | 1.148197 |
| H | -5.337849 | -1.603645 | 0.666158  | H | 0.006146 | -1.78163 | 1.081264 |
| H | -5.13574  | 0.721545  | 1.647813  | O | -0.30461 | 1.795539 | -1.23377 |
| H | -4.93907  | 0.681825  | -0.115284 | O | 0.09777  | 3.671345 | -0.06385 |
| H | -2.580123 | 1.326486  | -1.084105 | O | -3.59287 | -0.99074 | -1.44449 |
| H | -0.601011 | 1.723125  | 0.803291  | O | 2.745461 | -2.01072 | -0.21848 |
| H | 1.868612  | 0.421047  | -1.975147 | H | -3.98948 | -3.43211 | -0.24323 |
| H | 3.809388  | 1.902317  | -1.913205 | O | 0.988512 | -3.22886 | 0.467313 |

**Table S47** Optimized Z-matrixes of **4e-3** in the gas phase (Å) at the M06-2X/def2-SVP level.

|   |           |           |           |   |          |          |          |
|---|-----------|-----------|-----------|---|----------|----------|----------|
| C | -3.246247 | -1.691102 | -0.125227 | H | 5.128091 | 1.7128   | 0.344593 |
| C | -4.196499 | -1.240905 | 0.955487  | H | 3.924197 | 2.976628 | 0.632666 |
| C | -4.457141 | 0.25871   | 0.847319  | H | 3.832766 | 1.384135 | 2.520969 |
| C | -3.162063 | 1.088543  | 0.926431  | H | 1.409192 | 0.764302 | 2.352622 |
| C | -2.248052 | 0.718435  | -0.285154 | H | 1.558024 | 2.174189 | 1.258861 |
| C | -0.765052 | 1.113407  | -0.098795 | H | 1.88612  | -1.49092 | 1.596305 |
| C | 0.145201  | -0.122599 | 0.043189  | H | 4.946615 | -2.12304 | 1.156602 |
| C | 1.635835  | 0.20871   | 0.263563  | H | 5.751924 | -0.57041 | 1.822315 |
| C | 2.307846  | 0.770588  | -0.977992 | H | -2.57896 | 3.18747  | 0.777267 |
| C | -2.347904 | -0.723016 | -0.769071 | H | -4.09256 | 2.912678 | 1.672273 |
| C | 3.3876    | 1.554767  | -0.896897 | H | -4.07724 | 2.782424 | -0.10534 |
| C | 4.044911  | 1.901116  | 0.414603  | H | -3.27739 | 1.028614 | 3.07989  |



|   |           |           |           |   |          |          |          |
|---|-----------|-----------|-----------|---|----------|----------|----------|
| C | 3.440392  | 1.057186  | 1.548685  | H | -2.11948 | -0.15919 | 2.414391 |
| C | 1.906292  | 1.149573  | 1.449158  | H | -1.69489 | 1.556269 | 2.494771 |
| C | 2.431848  | -1.027323 | 0.760113  | H | -1.26224 | -2.2582  | -1.83118 |
| C | 3.712926  | -0.417502 | 1.288548  | H | -1.31033 | -0.66341 | -2.60581 |
| C | 4.861717  | -1.070219 | 1.433606  | H | -0.17276 | 3.468918 | -3.19152 |
| C | -3.498026 | 2.579047  | 0.808313  | H | 0.784749 | 4.72039  | -2.30789 |
| C | -2.518337 | 0.853239  | 2.301566  | H | 1.50386  | 3.125401 | -2.71284 |
| C | -1.186019 | -1.176707 | -1.636924 | H | 1.786318 | -3.26228 | -2.46883 |
| C | 0.1275    | 3.088477  | -1.103156 | H | 3.190645 | -4.00417 | -1.67513 |
| C | 0.584196  | 3.650676  | -2.41865  | H | 1.560787 | -4.78095 | -1.54069 |
| C | 1.799391  | -3.005391 | -0.381337 | O | -2.96307 | -3.03005 | -0.07974 |
| C | 2.111034  | -3.836522 | -1.588318 | O | 0.100664 | -0.88863 | -1.13292 |
| H | -3.774642 | -1.51777  | 1.932149  | O | -0.37018 | -0.84715 | 1.116504 |
| H | -5.128065 | -1.81478  | 0.831686  | H | -0.0061  | -1.75086 | 1.056404 |
| H | -5.133453 | 0.583429  | 1.65324   | O | -0.32422 | 1.829809 | -1.25229 |
| H | -4.965054 | 0.461081  | -0.108314 | O | 0.163937 | 3.664649 | -0.05005 |
| H | -2.602125 | 1.319111  | -1.139559 | O | -3.5612  | -1.12855 | -1.38686 |
| H | -0.641991 | 1.754728  | 0.779834  | O | 2.677915 | -2.0148  | -0.23058 |
| H | 1.88244   | 0.49153   | -1.942504 | H | -2.01342 | -3.16929 | -0.1798  |
| H | 3.841344  | 1.942788  | -1.813608 | O | 0.855605 | -3.19388 | 0.352418 |

**Table S48** Optimized Z-matrixes of **4e-4** in the gas phase (Å) at the M06-2X/def2-SVP level.

|   |           |           |           |   |          |          |          |
|---|-----------|-----------|-----------|---|----------|----------|----------|
| C | 2.864642  | -1.78367  | 0.091835  | H | -5.1193  | 1.716607 | -0.28866 |
| C | 3.565632  | -1.544196 | -1.232559 | H | -3.92981 | 2.981789 | -0.62589 |
| C | 3.279731  | -0.168129 | -1.843844 | H | -3.8714  | 1.349607 | -2.4851  |
| C | 3.306459  | 1.000342  | -0.845614 | H | -1.44029 | 0.756642 | -2.36416 |
| C | 2.297773  | 0.756673  | 0.315184  | H | -1.57123 | 2.186313 | -1.29787 |
| C | 0.810002  | 1.138491  | 0.056619  | H | -1.88015 | -1.45915 | -1.58887 |
| C | -0.113327 | -0.088759 | -0.053018 | H | -4.92337 | -2.13259 | -0.99615 |
| C | -1.609194 | 0.239596  | -0.260106 | H | -5.76584 | -0.59902 | -1.66059 |
| C | -2.262997 | 0.814611  | 0.984806  | H | 4.754192 | 2.06788  | 0.38273  |
| C | 2.31293   | -0.659781 | 0.86193   | H | 5.457349 | 1.264066 | -1.04022 |
| C | -3.350637 | 1.589131  | 0.916336  | H | 4.986345 | 0.305147 | 0.3924   |
| C | -4.039046 | 1.909761  | -0.385602 | H | 2.781923 | 3.127867 | -0.89456 |
| C | -3.453316 | 1.047847  | -1.5154   | H | 3.830483 | 2.584308 | -2.22701 |
| C | -1.916712 | 1.15577   | -1.456007 | H | 2.10307  | 2.197445 | -2.25101 |
| C | -2.401598 | -1.011074 | -0.729182 | H | 1.273824 | -1.94757 | 2.219168 |
| C | -3.70773  | -0.42334  | -1.215181 | H | 1.175255 | -0.20303 | 2.629153 |
| C | -4.857146 | -1.085473 | -1.298597 | H | 0.20035  | 3.658394 | 3.011744 |
| C | 4.710919  | 1.158811  | -0.237786 | H | -0.75069 | 4.864751 | 2.060906 |
| C | 2.97806   | 2.298856  | -1.592971 | H | -1.47517 | 3.294049 | 2.544787 |
| C | 1.168746  | -0.937733 | 1.805414  | H | -1.50936 | -3.24019 | 2.44431  |
| C | -0.092298 | 3.171241  | 0.944637  | H | -2.97597 | -3.9788  | 1.765017 |
| C | -0.553138 | 3.801715  | 2.22742   | H | -1.36155 | -4.75945 | 1.504567 |
| C | -1.684689 | -2.981856 | 0.370786  | O | 2.357392 | -3.04956 | 0.289067 |
| C | -1.906121 | -3.814801 | 1.593893  | O | -0.07286 | -0.86698 | 1.120792 |
| H | 3.245996  | -2.332169 | -1.927898 | O | 0.383033 | -0.79459 | -1.15145 |
| H | 4.644128  | -1.689149 | -1.062491 | H | 0.001967 | -1.69103 | -1.1193  |

|   |           |           |           |   |          |          |          |
|---|-----------|-----------|-----------|---|----------|----------|----------|
| H | 2.288722  | -0.190446 | -2.316439 | O | 0.353414 | 1.919324 | 1.162326 |
| H | 4.014554  | 0.035571  | -2.639474 | O | -0.12045 | 3.689633 | -0.13737 |
| H | 2.602059  | 1.422211  | 1.141156  | O | 3.537885 | -1.26795 | 1.217345 |
| H | 0.703071  | 1.724577  | -0.861316 | O | -2.58755 | -2.0105  | 0.263379 |
| H | -1.815292 | 0.555491  | 1.944707  | H | 1.443625 | -3.08413 | -0.03317 |
| H | -3.786857 | 1.987042  | 1.837319  | O | -0.7774  | -3.15402 | -0.41606 |

**Table S49** Optimized Z-matrixes of **4e-5** in the gas phase (Å) at the M06-2X/def2-SVP level.

|   |           |           |           |   |          |          |          |
|---|-----------|-----------|-----------|---|----------|----------|----------|
| C | -3.607714 | -1.529191 | -0.302874 | H | 5.186301 | 1.736294 | -0.06445 |
| C | -4.659261 | -0.91901  | 0.588316  | H | 3.981261 | 2.998746 | 0.221699 |
| C | -4.549803 | 0.600751  | 0.576554  | H | 4.062792 | 1.538171 | 2.21657  |
| C | -3.131184 | 1.108384  | 0.896435  | H | 1.650331 | 0.86455  | 2.277096 |
| C | -2.173703 | 0.66118   | -0.244366 | H | 1.682492 | 2.20978  | 1.102674 |
| C | -0.699869 | 1.05008   | 0.004004  | H | 2.10992  | -1.4174  | 1.632534 |
| C | 0.219511  | -0.172445 | 0.132912  | H | 5.140654 | -2.03282 | 0.996662 |
| C | 1.720909  | 0.184092  | 0.215208  | H | 5.960619 | -0.42696 | 1.499002 |
| C | 2.290046  | 0.667128  | -1.108802 | H | -2.17532 | 3.080003 | 1.085189 |
| C | -2.376891 | -0.793316 | -0.674407 | H | -3.81929 | 2.981758 | 1.757407 |
| C | 3.363213  | 1.46276   | -1.162443 | H | -3.58166 | 3.040898 | -0.00549 |
| C | 4.107052  | 1.912181  | 0.069805  | H | -3.46741 | 0.806864 | 3.015305 |
| C | 3.604203  | 1.141299  | 1.300901  | H | -2.52191 | -0.5086  | 2.252878 |
| C | 2.065671  | 1.202885  | 1.315251  | H | -1.75448 | 1.037687 | 2.599974 |
| C | 2.579791  | -1.002221 | 0.727476  | H | -1.16095 | -2.56553 | -0.47711 |
| C | 3.884919  | -0.341806 | 1.115624  | H | -1.31693 | -1.93479 | -2.13361 |
| C | 5.054442  | -0.966055 | 1.213014  | H | -0.23641 | 3.545115 | -3.00639 |
| C | -3.172455 | 2.639773  | 0.935196  | H | 0.711227 | 4.785705 | -2.09966 |
| C | -2.693929 | 0.575401  | 2.265679  | H | 1.451885 | 3.214201 | -2.56997 |
| C | -1.180664 | -1.645952 | -1.083637 | H | 1.653214 | -3.48607 | -2.24779 |
| C | 0.098843  | 3.103948  | -0.939037 | H | 3.179751 | -4.10753 | -1.58364 |
| C | 0.531123  | 3.715984  | -2.240862 | H | 1.615344 | -4.93217 | -1.19088 |
| C | 1.90602   | -3.062944 | -0.205323 | O | -3.58372 | -2.91051 | -0.34079 |
| C | 2.112053  | -3.975075 | -1.375426 | O | 0.067384 | -0.98506 | -1.00429 |
| H | -4.54275  | -1.313679 | 1.610578  | O | -0.21601 | -0.8262  | 1.282984 |
| H | -5.643734 | -1.249001 | 0.220978  | H | 0.158311 | -1.7277  | 1.274491 |
| H | -5.255537 | 1.031058  | 1.303975  | O | -0.24758 | 1.818967 | -1.11132 |
| H | -4.844597 | 0.967605  | -0.419441 | O | 0.070684 | 3.671491 | 0.120452 |
| H | -2.468061 | 1.239568  | -1.134345 | O | -3.49376 | -0.96153 | -1.56127 |
| H | -0.604258 | 1.655406  | 0.912918  | O | 2.770061 | -2.04759 | -0.21273 |
| H | 1.793372  | 0.324336  | -2.017029 | H | -3.74591 | -3.24658 | 0.547387 |
| H | 3.742179  | 1.789092  | -2.13547  | O | 1.046141 | -3.21019 | 0.632296 |

**Table S50** The DP4+ probabilities of **4a**, **4b**, **4c**, **4d**, and **4e**.

| Functional | Solvent | Basis Set  | Type of Data    |
|------------|---------|------------|-----------------|
| mPW1PW91   | PCM     | 6-31G(d,p) | Unscaled Shifts |

| <input type="checkbox"/> | Isomer 1 ( <b>4a</b> ) | Isomer 2 ( <b>4b</b> ) | Isomer 3 ( <b>4c</b> ) | Isomer 4 ( <b>4d</b> ) | Isomer 5 ( <b>4e</b> ) |
|--------------------------|------------------------|------------------------|------------------------|------------------------|------------------------|
| sDP4+ (H data)           | 100.00%                | 0.00%                  | 0.00%                  | 0.00%                  | 0.00%                  |

|                  |         |       |       |       |       |
|------------------|---------|-------|-------|-------|-------|
| sDP4+ (C data)   | 100.00% | 0.00% | 0.00% | 0.00% | 0.00% |
| sDP4+ (all data) | 100.00% | 0.00% | 0.00% | 0.00% | 0.00% |
| uDP4+ (H data)   | 100.00% | 0.00% | 0.00% | 0.00% | 0.00% |
| uDP4+ (C data)   | 100.00% | 0.00% | 0.00% | 0.00% | 0.00% |
| uDP4+ (all data) | 100.00% | 0.00% | 0.00% | 0.00% | 0.00% |
| DP4+ (H data)    | 100.00% | 0.00% | 0.00% | 0.00% | 0.00% |
| DP4+ (C data)    | 100.00% | 0.00% | 0.00% | 0.00% | 0.00% |
| DP4+ (all data)  | 100.00% | 0.00% | 0.00% | 0.00% | 0.00% |

**Figure S36** Calculated ECD of **4a**.

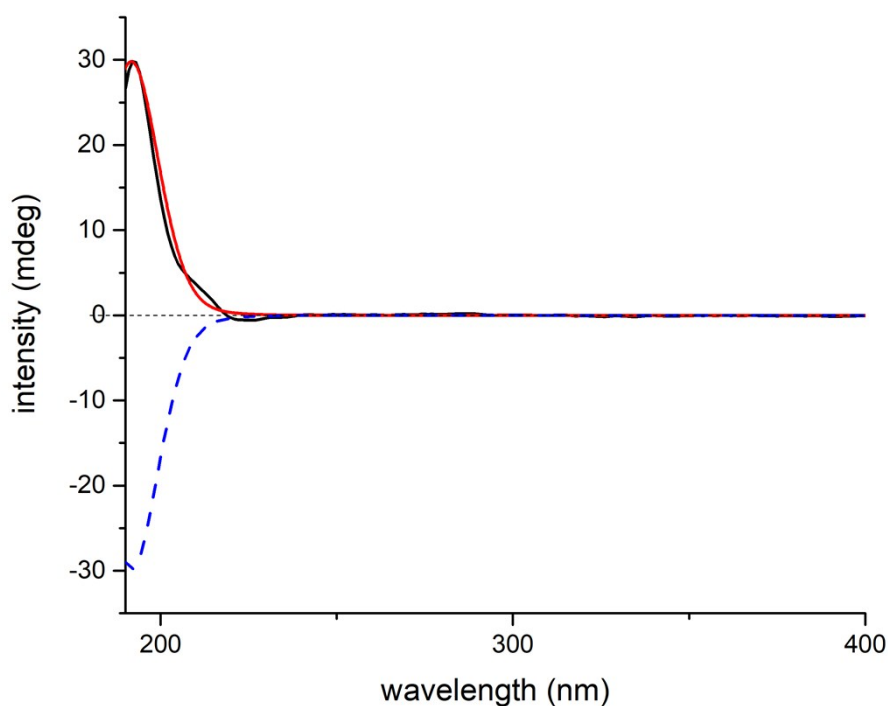

Computational Data of (1*S*, 5*S*, 6*S*, 7*R*, 8*S*, 10*R*, 13*R*, 15*R*) -**4a**

Experimental ECD spectrum of **4a** (black); Calculated ECD spectrum of (1*S*, 5*S*, 6*S*, 7*R*, 8*S*, 10*R*, 13*R*, 15*R*) -**4a** (shift = 5 nm, red) and (1*R*, 5*R*, 6*R*, 7*S*, 8*R*, 10*S*, 13*S*, 15*S*) -**4a** (shift = 5 nm, blue dash) at the CAM-B3LYP-SCRF/def2-SVP level of theory in MeOH with PCM.

**Table S51** Key transitions, oscillator strengths, and rotatory strengths in the ECD spectra of conformer **4a-1** at the CAM-B3LYP-SCRF/def2-SVP level in MeOH with PCM.

| <i>Num</i> <sup>a</sup> | <i>exited state</i> <sup>b</sup> | <i>CI Coefficient</i> | $\Delta E$ (eV) <sup>c</sup> | $\lambda$ (nm) <sup>d</sup> | <i>f</i> <sup>e</sup> | <i>R<sub>vel</sub></i> <sup>f</sup> | <i>R<sub>len</sub></i> <sup>g</sup> |
|-------------------------|----------------------------------|-----------------------|------------------------------|-----------------------------|-----------------------|-------------------------------------|-------------------------------------|
| 1                       | 113 ->121                        | 0.27515               | 6.0015                       | 206.59                      | 0.0021                | 1.6474                              | -1.1744                             |
| □                       | 114 ->121                        | 0.3955                | □                            | □                           | □                     | □                                   | □                                   |
| □                       | 114 ->122                        | 0.25838               | □                            | □                           | □                     | □                                   | □                                   |
| 2                       | 114 ->123                        | -0.22553              | 6.0716                       | 204.2                       | 0.0007                | -0.9069                             | -1.9429                             |
| □                       | 116 ->123                        | 0.45504               | □                            | □                           | □                     | □                                   | □                                   |
| 3                       | 120 ->121                        | -0.40882              | 6.7523                       | 183.62                      | 0.1087                | 213.5377                            | 210.5781                            |
| □                       | 120 ->122                        | 0.52534               | □                            | □                           | □                     | □                                   | □                                   |
| 4                       | 120 ->123                        | -0.29618              | 6.8883                       | 179.99                      | 0.3581                | -157.9556                           | -161.4597                           |
| □                       | 120 ->124                        | 0.61381               | □                            | □                           | □                     | □                                   | □                                   |
| 5                       | 119 ->121                        | -0.36995              | 7.1779                       | 172.73                      | 0.3451                | 63.469                              | 67.4034                             |
| □                       | 119 ->122                        | 0.5216                | □                            | □                           | □                     | □                                   | □                                   |
| 6                       | 120 ->121                        | 0.4713                | 7.2413                       | 171.22                      | 0.029                 | -17.715                             | -12.9353                            |

|    |           |          |        |        |        |          |          |
|----|-----------|----------|--------|--------|--------|----------|----------|
| □  | 120 ->122 | 0.37412  | □      | □      | □      | □        | □        |
| 7  | 119 ->123 | -0.33752 | 7.3577 | 168.51 | 0.0921 | 26.5538  | 27.8792  |
| □  | 119 ->124 | 0.56176  | □      | □      | □      | □        | □        |
| 8  | 118 ->121 | 0.5786   | 7.5543 | 164.12 | 0.0003 | 0.5435   | 1.3738   |
| □  | 118 ->122 | 0.331    | □      | □      | □      | □        | □        |
| 9  | 112 ->122 | 0.26397  | 7.6015 | 163.1  | 0.018  | -43.7525 | -46.895  |
| 10 | 119 ->121 | 0.42599  | 7.6814 | 161.41 | 0.0043 | -2.3667  | -2.6143  |
| □  | 119 ->122 | 0.30522  | □      | □      | □      | □        | □        |
| □  | 120 ->123 | 0.28195  | □      | □      | □      | □        | □        |
| 11 | 110 ->123 | -0.23331 | 7.7013 | 160.99 | 0.0057 | -30.9954 | -32.8277 |
| □  | 110 ->124 | 0.3172   | □      | □      | □      | □        | □        |
| 12 | 119 ->121 | -0.2787  | 7.7102 | 160.8  | 0.0128 | -1.6874  | -1.7164  |
| □  | 119 ->122 | -0.27156 | □      | □      | □      | □        | □        |
| □  | 120 ->123 | 0.39274  | □      | □      | □      | □        | □        |
| 13 | 117 ->121 | -0.24909 | 7.9134 | 156.68 | 0.0767 | 9.3847   | 2.8103   |
| □  | 117 ->123 | 0.34454  | □      | □      | □      | □        | □        |
| □  | 119 ->123 | 0.25589  | □      | □      | □      | □        | □        |
| 14 | 117 ->121 | 0.50239  | 7.9976 | 155.03 | 0.0038 | 6.7276   | 7.489    |
| □  | 117 ->122 | 0.22861  | □      | □      | □      | □        | □        |
| 15 | 120 ->125 | 0.38394  | 8.0456 | 154.1  | 0.0012 | 0.2761   | 0.1127   |
| □  | 120 ->127 | 0.3796   | □      | □      | □      | □        | □        |
| 16 | 117 ->123 | -0.30988 | 8.1386 | 152.34 | 0.0163 | -16.0349 | -17.7508 |
| □  | 117 ->124 | 0.33854  | □      | □      | □      | □        | □        |
| 17 | 117 ->122 | 0.25622  | 8.1531 | 152.07 | 0.0166 | 18.2979  | 15.8805  |
| 18 | 118 ->122 | 0.23644  | 8.1713 | 151.73 | 0.0421 | -19.9092 | -4.0189  |
| □  | 118 ->123 | 0.29465  | □      | □      | □      | □        | □        |
| □  | 118 ->124 | 0.22675  | □      | □      | □      | □        | □        |
| 19 | 118 ->123 | 0.46918  | 8.2075 | 151.06 | 0.0043 | -7.7244  | -7.1561  |
| □  | 118 ->124 | -0.34598 | □      | □      | □      | □        | □        |
| 20 | 110 ->122 | 0.25998  | 8.2971 | 149.43 | 0.0149 | -10.1591 | -8.6435  |
| □  | 117 ->122 | 0.33446  | □      | □      | □      | □        | □        |
| □  | 117 ->124 | -0.26599 | □      | □      | □      | □        | □        |
| 21 | 118 ->128 | 0.28605  | 8.3607 | 148.29 | 0.0115 | 18.321   | 28.7991  |
| 22 | 117 ->124 | 0.26412  | 8.3972 | 147.65 | 0.0108 | -28.1608 | -21.6317 |
| □  | 118 ->122 | -0.25046 | □      | □      | □      | □        | □        |
| □  | 118 ->124 | 0.32777  | □      | □      | □      | □        | □        |
| 23 | 112 ->121 | 0.32254  | 8.4171 | 147.3  | 0.0108 | -8.6308  | -12.859  |
| 24 | 112 ->124 | 0.2372   | 8.4251 | 147.16 | 0.0188 | -45.083  | -49.7241 |
| 25 | 119 ->125 | 0.26005  | 8.4359 | 146.97 | 0.0028 | -12.6652 | -12.2367 |
| □  | 119 ->127 | 0.28865  | □      | □      | □      | □        | □        |
| 26 | 117 ->123 | 0.23319  | 8.4602 | 146.55 | 0.0201 | -35.4905 | -33.1283 |
| 27 | 112 ->121 | 0.21757  | 8.511  | 145.68 | 0.0108 | 33.972   | 39.546   |
| 28 | 119 ->123 | 0.43652  | 8.529  | 145.37 | 0.0137 | -19.6374 | -20.525  |
| 29 | 118 ->122 | -0.23066 | 8.5469 | 145.06 | 0.012  | -1.4405  | -3.1371  |

|    |           |         |        |        |       |         |         |
|----|-----------|---------|--------|--------|-------|---------|---------|
| □  | 118 ->124 | 0.24166 | □      | □      | □     | □       | □       |
| 30 | 116 ->124 | 0.23429 | 8.6319 | 143.63 | 0.019 | 22.4587 | 24.7793 |

<sup>a</sup>Number of the excited states. <sup>b</sup>only excited states with contribution over 10% were listed.

<sup>c</sup>Excitation energy. <sup>d</sup>Wavelength. <sup>e</sup>Oscillator strength. <sup>f</sup>Rotatory strength in velocity form (10-40

cgs.). <sup>g</sup>Rotatory strength in length form ( $10^{-40}$  cgs.).

## 8. Results of the biological activity evaluation.

Compounds 1–4 were evaluated neurotrophic activities, including Acetylcholinesterase (AChE) and butyrylcholinesterase (BuChE) inhibitory activity, induction PC-12 cells differentiation activity, the inhibitory effects of samples on platelet aggregation in rabbits induced by ADP, AA, and PAF, only compound 2 showed weak anti-AChE activity ( $IC_{50} = 37.6 \pm 2.3 \mu\text{M}$ ) and weak anti-ADP (inhibited rate =  $39.2 \pm 10.7\%$ ) and anti-AA induced (inhibited rate =  $15.9 \pm 10.3\%$ ) platelet aggregation in rabbits.

### 8.1 Acetylcholinesterase/butyrylcholinesterase inhibitory activity

Acetylcholinesterase/butyrylcholinesterase (AChE/BuChE) inhibitory activity of the compounds isolated was assayed by the spectrophotometric method developed by Ellman et al<sup>1</sup> with slightly modification. S-Acetylthiocholine iodide, S-butyrylthiocholine iodide, 5,5'-dithio-bis-(2-nitrobenzoic) acid (DTNB, Ellman's reagent), acetylcholinesterase and butyrylcholinesterase derived from human erythrocytes were purchased from Sigma Chemical. Compounds were dissolved in DMSO. The reaction mixture (totally 200  $\mu\text{L}$ ) containing phosphate buffer (pH 8.0), test compound (50  $\mu\text{M}$ ), and acetyl cholinesterase (0.02 U/mL) or butyrylcholinesterase (0.016 U/mL), was incubated for 20 min (37 °C). Then, the reaction was initiated by the addition of 40  $\mu\text{L}$  of solution containing DTNB(0.625mM) and acetylthiocholine iodide (0.625 mM) or butyrylthiocholine iodide (0.625 mM) for AChE or BuChE inhibitory activity assay, respectively. The hydrolysis of acetylthiocholine or butyrylthiocholine was monitored at 405 nm every 30seconds for one hour. Tacrine was used as positive control with final concentration of 0.333 $\mu\text{M}$ . All the reactions were performed in triplicate.

The percentage inhibition was calculated as follows:

$\% \text{ inhibition} = (E - S)/E \times 100$  (E is the activity of the enzyme without test compound and S is the activity of enzyme with test compound).

**Table S52** AChE inhibitory effects of compounds 1–4.

| Sample             | Tacrine | 1     | 2     | 3    | 4     |
|--------------------|---------|-------|-------|------|-------|
| Inhibited rate (%) | 55.41   | 35.26 | 51.64 | 4.43 | 11.93 |
| SD                 | 2.04    | 2.96  | 0.21  | 2.32 | 2.44  |
| Inhibited activity |         | ++    | ++    | –    | +     |

$\% \text{ inhibition} = (E - S)/E \times 100$  (E is the activity of the enzyme without test compound and S is the activity of enzyme with test compound).

**Table S53** BuChE inhibitory effects of compounds **1–4**.

| Sample             | Tacrine | 1    | 2    | 3    | 4    |
|--------------------|---------|------|------|------|------|
| Inhibited rate (%) | 90.96   | 0.66 | 9.36 | 1.40 | 0.04 |
| SD                 | 0.17    | 0.23 | 0.35 | 0.88 | 0.83 |
| Inhibited activity | □       | –□   | –□   | –□   | –□   |

% inhibition =  $(E - S)/E \times 100$  (E is the activity of the enzyme without test compound and S is the activity of enzyme with test compound).

## 8.2 Neurite outgrowth-promoting activity

The neurotrophic activities of the test compounds were examined according to an assay using PC12 cells as reported.<sup>2</sup> Briefly, PC12 cells were maintained in 1640 medium supplemented with 10% horse serum (HS), and 5% fetal bovine serum (FBS), and incubated at 5% CO<sub>2</sub> and 37°C. Test compounds were dissolved in DMSO. For the neurite outgrowth-promoting activity bioassay, PC12 cells were seeded at a density of  $5 \times 10^4$  cells/ml in 48-well plate coated with poly-L-lysine. After 24 h, the medium was changed to that containing 10  $\mu$ M of each test compounds plus 5 ng/ml NGF, or various concentrations of NGF (50 ng/ml for the positive control, 5 ng/ml for the negative control). The final concentration of DMSO was 0.05%, and the same concentration of DMSO was added into the negative control. After 72 h incubation, the neurite outgrowth was assessed under a phase contrast microscope. Neurite processes with a length equal to or greater than the diameter of the neuron cell body was scored as neurite bearing cells. The ratio of the neurite-bearing cells to total cells (with at least 100 cells examined/view area; 5 viewing area/well) was determined and expressed as a percentage.

**Table S54** Neurite outgrowth-promoting activity (PC-12 cells).

| Group                         | Blank | Negative<br>5ng/mL<br>NGF | Positive<br>50ng/mL<br>NGF | 1     | 2     | 3     | 4     |
|-------------------------------|-------|---------------------------|----------------------------|-------|-------|-------|-------|
| 72 h differentiation rate (%) | 0.00% | 4.31%                     | 21.03%                     | 6.03% | 6.57% | 5.45% | 5.70% |

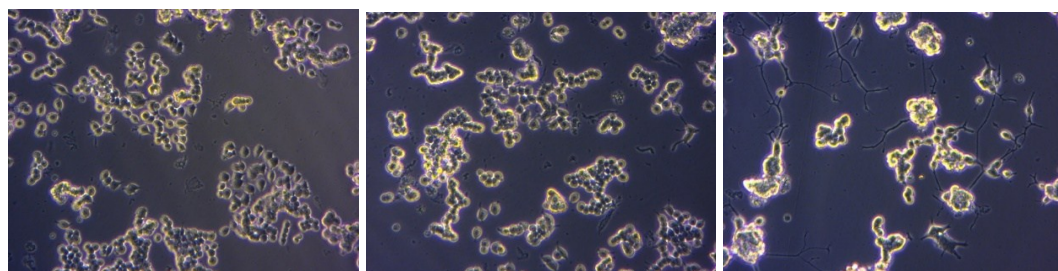

(1) Blank

(2) Negative 5ng/mL NGF

(3) Positive 50ng/mL NGF



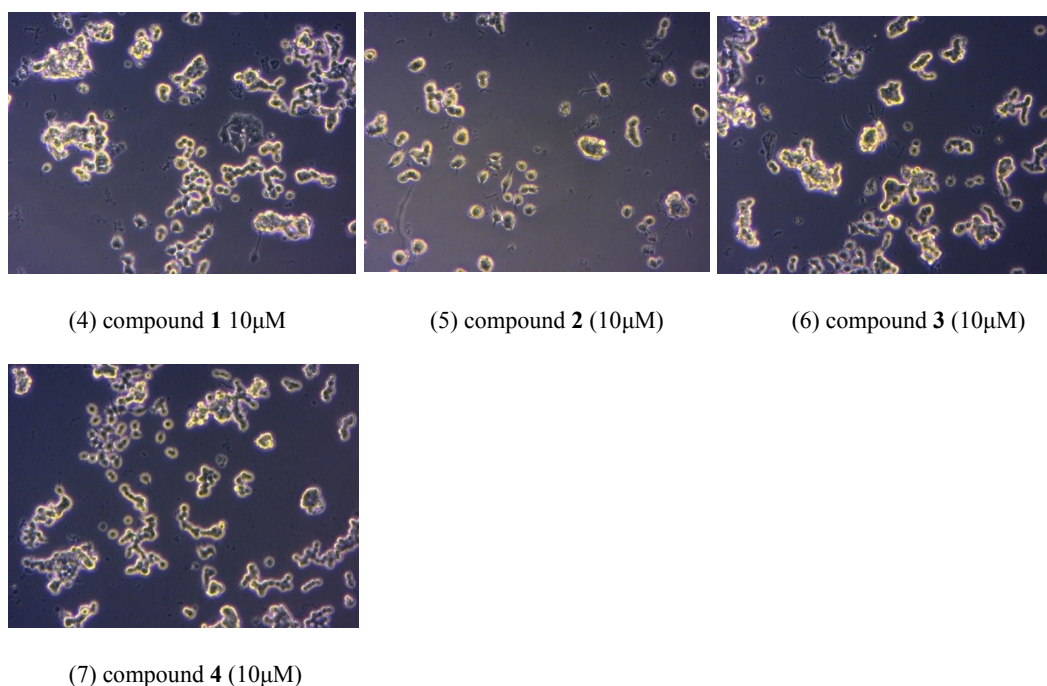

**Figure S37** 72 h cellular morphology of 1–4.

### 8.3 Test of platelet aggregation assays.

Turbid metric measurements of platelet aggregation of the compounds 1–4 and Ginkgolide B were performed in a Chronolog Model 700 Aggregometer (Chronolog Corporation, Havertown, PA, USA) according to Born's method.<sup>3-5</sup>

The blood from the central aural artery of rabbits by a butterfly infusion set, were anticoagulated with 3.8% sodium citrate (9:1, v/v). Platelet-rich plasma (PRP) was prepared shortly after blood collection by spinning the sample at 180 g for 10 min at 22 °C. The PRP was carefully removed and the remaining blood were centrifuged at 2400 g for 10 min to obtain PPP. The centrifuge temperature was maintained at 22°C. Platelet counts were adjusted by the addition of PPP to the PRP to achieve a count of  $500 \times 10^9 \text{ L}^{-1}$ . Platelet aggregation studies were completed within 3h of the preparation of PRP. Immediately after the preparation of PRP, 250 µL was transferred into each of prepared test tubes, with 250 µL PPP set as a control. Before addition of inducers, compounds were incubated with PRP at 37°C for 5 min. The change of optical density as a results of platelet aggregation was recorded, and inhibition percentage of compounds was calculated according to the formula:

$$\text{Inhibition of aggregation (\%)} = (A-B)/A \times 100\%$$

A: maximum change of turbidity in DMSO added

B: maximum change of turbidity in sample added

**Table S55** The inhibitory effects of samples on platelet aggregation in rabbits induced by ADP.

| Sample     |                      |               | Inducer |                      |               | Maximum aggregation rate (%) | Inhibited rate (%) |
|------------|----------------------|---------------|---------|----------------------|---------------|------------------------------|--------------------|
|            | sample amounts (C×V) | concentration |         | sample amounts (C×V) | concentration |                              |                    |
| DMSO       | 2.5µl                | 1%            | ---     | ---                  | ---           | 1.0±0.0***                   | ---                |
| CON.(DMSO) | 2.5µl                | 1%            | ADP     | 1mM×2.5µl            | 10µM          | 50.0±4.7                     | ---                |
| Ticagrelor | 0.5mg/ml×2.5µl       | 5 µg/ml       |         |                      |               | 10.0±2.0***                  | 80.1±4.9***        |
| 1          | 10.0mM×2.5µl         | 100µM         |         |                      |               | 49.0±8.2                     | 3.7±6.3            |
| 2          | 10.0mM×2.5µl         | 100µM         |         |                      |               | 30.5±6.4**                   | 39.2±10.7**        |
| 3          | 10.0mM×2.5µl         | 100µM         |         |                      |               | 48.3±2.5                     | 4.2±5.6            |
| 4          | 10.0mM×2.5µl         | 100µM         |         |                      |               | 51.7±4.7                     | -2.1±2.1           |

In comparison with the control: \*\* $P < 0.01$ , \*\*\* $P < 0.001$ .

**Table S56** The inhibitory effects of samples on platelet aggregation in rabbits induced by AA.

| Sample     |                      |               | Inducer |                      |               | Maximum aggregation rate (%) | Inhibited rate (%) |
|------------|----------------------|---------------|---------|----------------------|---------------|------------------------------|--------------------|
|            | sample amounts (C×V) | concentration |         | sample amounts (C×V) | concentration |                              |                    |
| DMSO       | 2.5µl                | 1%            | ---     | ---                  | ---           | 1.0±0.0***                   | ---                |
| CON.(DMSO) | 2.5µl                | 1%            | AA      | 50mM×2.5µl           | 0.5mM         | 57.8±5.5                     | ---                |
| Aspirin    | 4mg/ml×2.5µl         | 40µg/ml       |         |                      |               | 8.0±6.2***                   | 87.3±9.7***        |
| 1          | 10.0mM×2.5µl         | 100µM         |         |                      |               | 62.0±0.0                     | -4.1±11.2          |
| 2          | 10.0mM×2.5µl         | 100µM         |         |                      |               | 48.4±5.2*                    | 15.9±10.3*         |
| 3          | 10.0mM×2.5µl         | 100µM         |         |                      |               | 60.0±2.6                     | -0.5±8.6           |
| 4          | 10.0mM×2.5µl         | 100µM         |         |                      |               | 56.0±3.6                     | 5.9±13.2           |

In comparison with the control: \* $P < 0.05$ , \*\*\* $P < 0.001$ .

**Table S57** The inhibitory effects of samples on platelet aggregation in rabbits induced by PAF.

| Sample     |                      |               | Inducer |                      |               | Maximum aggregation rate (%) | Inhibited rate (%) |
|------------|----------------------|---------------|---------|----------------------|---------------|------------------------------|--------------------|
|            | sample amounts (C×V) | concentration |         | sample amounts (C×V) | concentration |                              |                    |
| DMSO       | 2.5µl                | 1%            | ---     | ---                  | ---           | 1.0±0.0***                   | ---                |
| CON.(DMSO) | 2.5µl                | 1%            | PAF     | 0.04 mg/ml×2.5µl     | 0.4µg/ml      | 65.8±11.5                    | ---                |
| GB         | 3.7mg/ml×2.5µl       | 37µg/ml       |         |                      |               | 7.5±5.0***                   | 88.3±9.0***        |
| 1          | 10.0mM×2.5µl         | 100µM         |         |                      |               | 69.3±11.7                    | -2.3±4.5           |

|   |              |       |  |  |  |          |          |
|---|--------------|-------|--|--|--|----------|----------|
| 2 | 10.0mM×2.5μl | 100μM |  |  |  | 60.3±8.7 | 8.0±4.1  |
| 3 | 10.0mM×2.5μl | 100μM |  |  |  | 69.3±9.1 | -2.8±7.8 |
| 4 | 10.0mM×2.5μl | 100μM |  |  |  | 62.3±5.7 | 6.9±12.3 |

In comparison with the control: \*\*\* $P < 0.001$ .

#### Reference:

1. Ellman, G. L.; Courtney, K. D.; Andres, V.; Featherstone, R. M., A new and rapid colorimetric determination of acetylcholinesterase activity. *Biochem Pharmacol* **1961**, *7*, 88-95.
2. Rede, L. A.; Tischler, A. S., Establishment of a noradrenergic clonal line of rat adrenal pheochromocytoma cells which respond to nerve growth factor. *Proc. Natl. Acad. Sci. U.S.A.* **1976**, *73*, 2424-2428.
3. Born, G. V. R. Aggregation of blood platelets by adenosine diphosphate and its reversal. *Nature* **1962**, *194*, 927–929.
4. Küster, L. J., Filep, J., Frölich, J. C. Mechanism of PAF-induced platelet aggregation in man. *Thromb Res.* **1986**, *43*, 425-33.
5. Ming, Y. W., Wen, D. D., Gao, N., Xiao, C., Yang, L., Li Xu, Wu Lian, Peng, W., L., Jiang, J., M., Zhao, J. H. Anticoagulant and antithrombotic evaluation of native fucosylated chondroitin sulfates and their derivatives as selective inhibitors of intrinsic factor Xase. *Eur J Med Chem* **2015**, *92*, 257–269.

## 9. HRESIMS, NMR, UV, CD and OR spectra of compounds 1–4

### 9.1 HRESIMS, NMR, UV, CD and OR spectra of maericalysin A (1)

#### Qualitative Analysis Report

|                               |                             |                      |                      |
|-------------------------------|-----------------------------|----------------------|----------------------|
| <b>Data Filename</b>          | Sie-57.d                    | <b>Sample Name</b>   | Sie-57               |
| <b>Sample Type</b>            | Sample                      | <b>Position</b>      | P1-A7                |
| <b>Instrument Name</b>        | Instrument 1                | <b>User Name</b>     |                      |
| <b>Acq Method</b>             | s.m                         | <b>Acquired Time</b> | 3/12/2018 4:27:45 PM |
| <b>IRM Calibration Status</b> |                             | <b>DA Method</b>     | Default.m            |
| <b>Comment</b>                |                             |                      |                      |
| <b>Sample Group</b>           |                             | <b>Info.</b>         |                      |
| <b>Acquisition SW</b>         | 6200 series TOF/6500 series |                      |                      |
| <b>Version</b>                | Q-TOF B.05.01 (B5125.2)     |                      |                      |

#### User Spectra

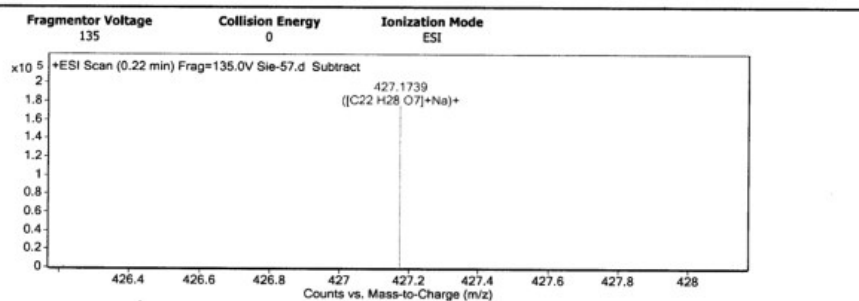

#### Peak List

| m/z      | z | Abund     | Formula                                        | Ion                 |
|----------|---|-----------|------------------------------------------------|---------------------|
| 274.2739 | 1 | 62594.49  |                                                |                     |
| 299.1617 | 1 | 62307.68  |                                                |                     |
| 318.3    | 1 | 47407.16  |                                                |                     |
| 427.1739 | 1 | 175415.72 | C <sub>22</sub> H <sub>28</sub> O <sub>7</sub> | (M+Na) <sup>+</sup> |
| 443.1476 | 1 | 178656.66 |                                                |                     |
| 444.1508 | 1 | 39199.72  |                                                |                     |
| 453.168  | 1 | 59150.43  |                                                |                     |
| 831.357  | 1 | 84183.29  |                                                |                     |

#### Formula Calculator Element Limits

| Element | Min | Max |
|---------|-----|-----|
| C       | 3   | 60  |
| H       | 0   | 120 |
| O       | 0   | 30  |

#### Formula Calculator Results

| Formula                                        | CalculatedMass | CalculatedMz | Mz       | Diff. (mDa) | Diff. (ppm) | DBE    |
|------------------------------------------------|----------------|--------------|----------|-------------|-------------|--------|
| C <sub>22</sub> H <sub>28</sub> O <sub>7</sub> | 404.1835       | 427.1727     | 427.1739 | -1.1        | -2.6        | 9.0000 |

--- End Of Report ---

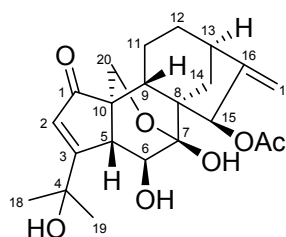

Figure S38 HRESIMS spectrum of maericalysin A (1).

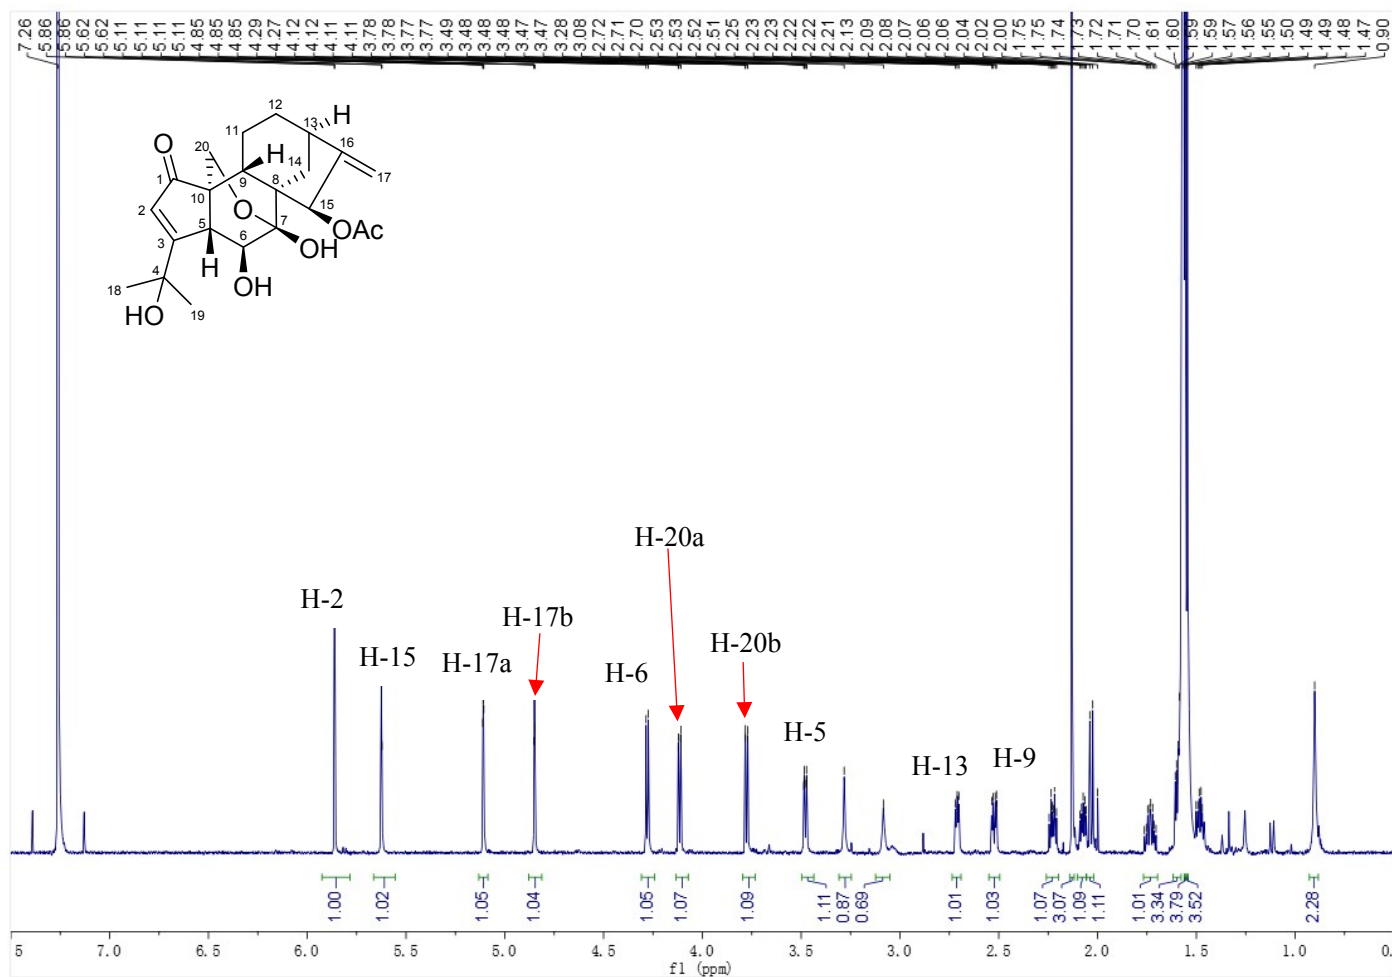

Figure S39 <sup>1</sup>H NMR spectrum (CDCl<sub>3</sub>, 800MHz) of maericalysin A (1).

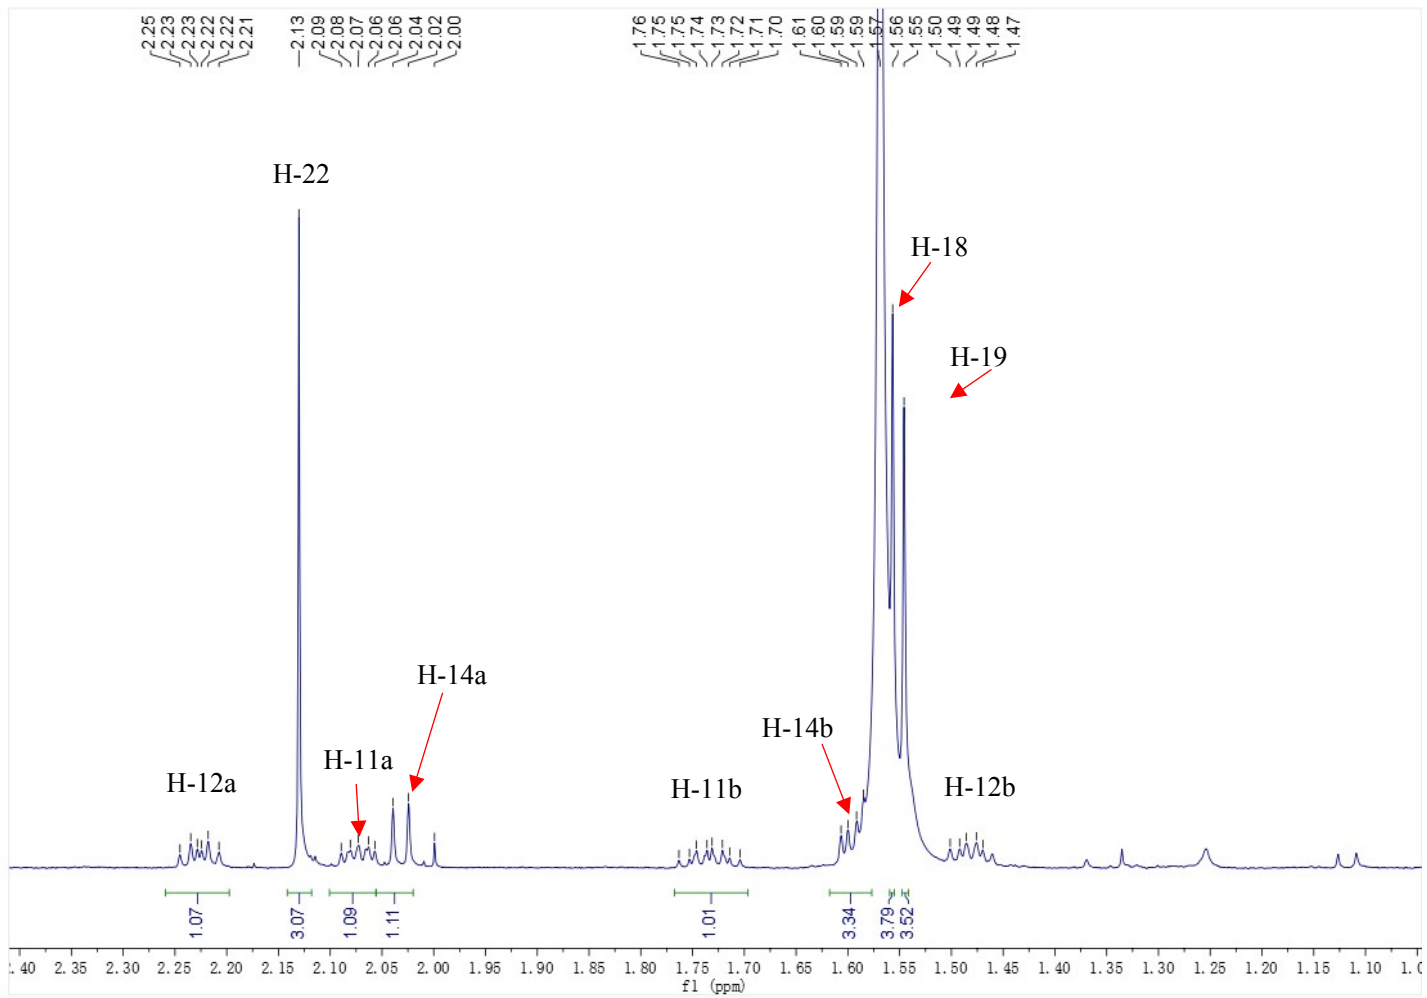

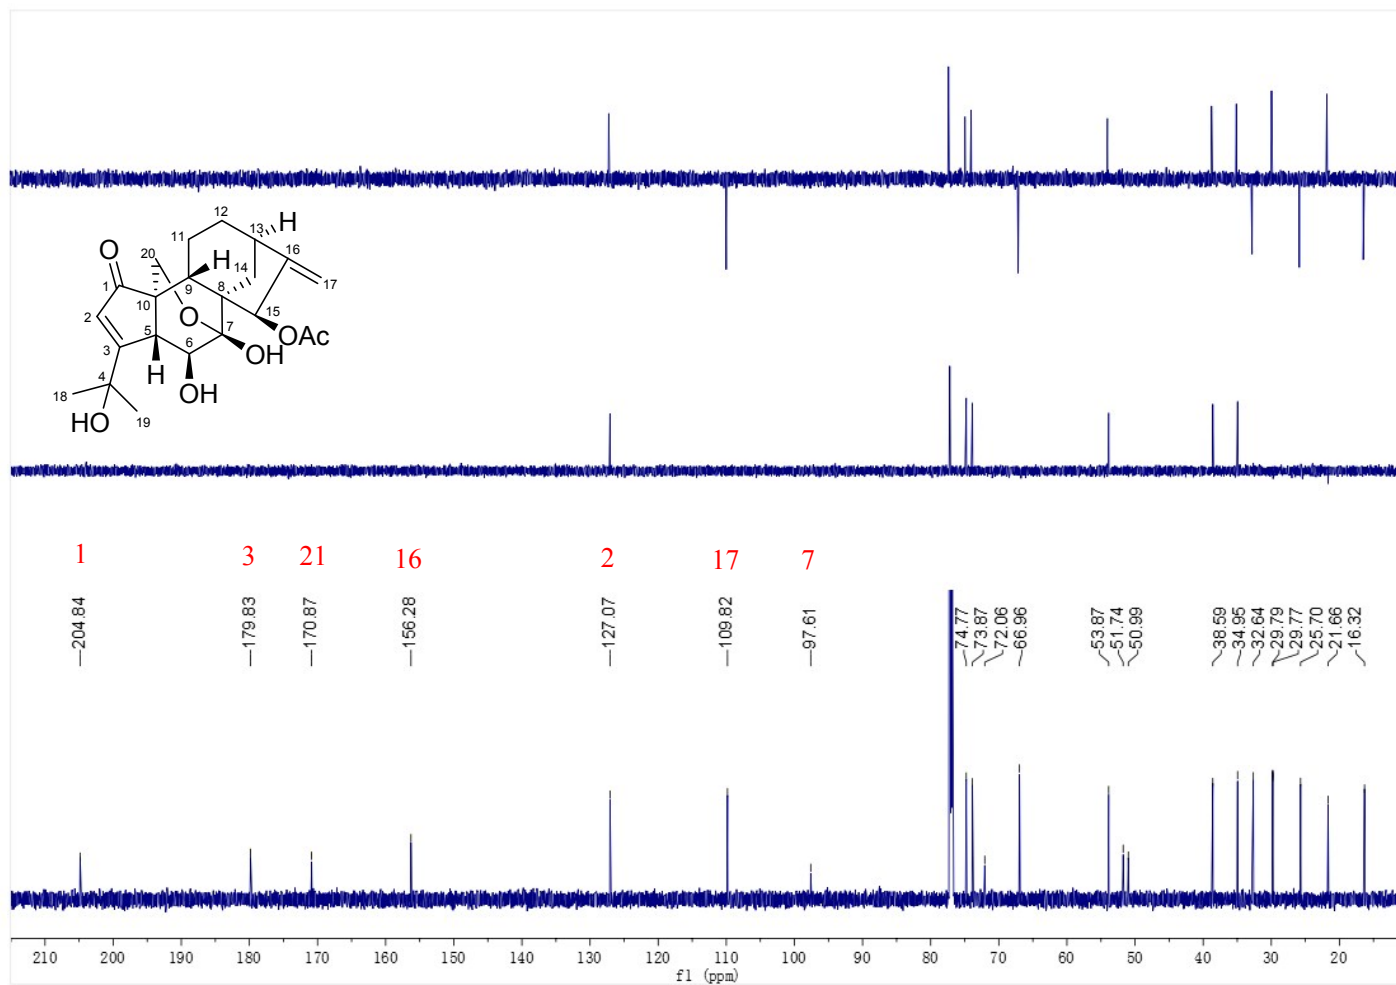

Figure S40 <sup>13</sup>C NMR spectrum (CDCl<sub>3</sub>, 800MHz) of maericalysin A (1).

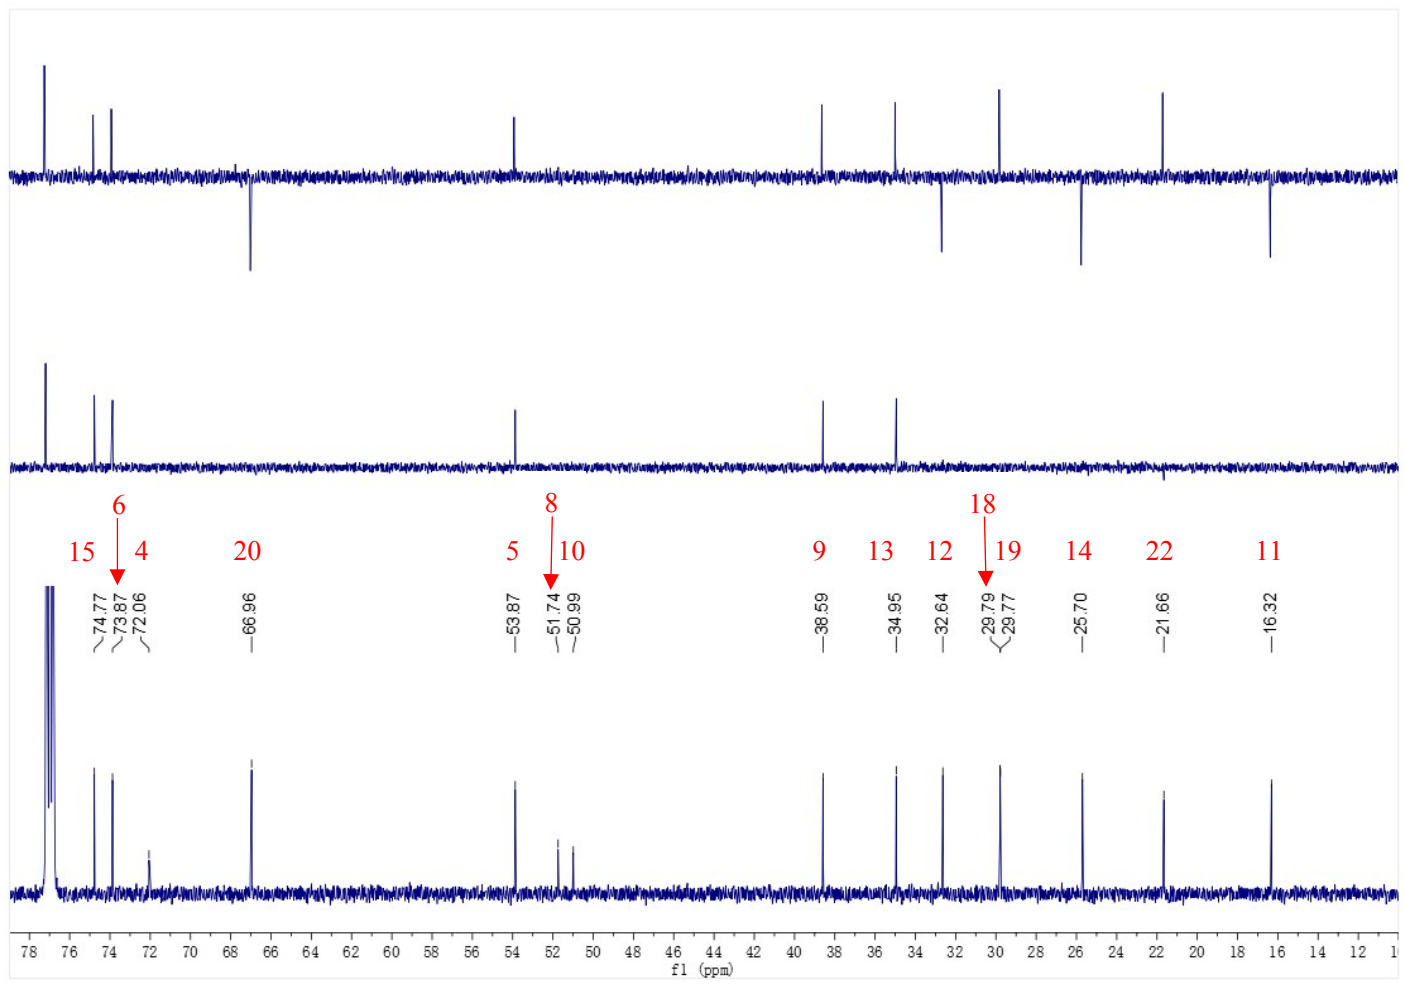



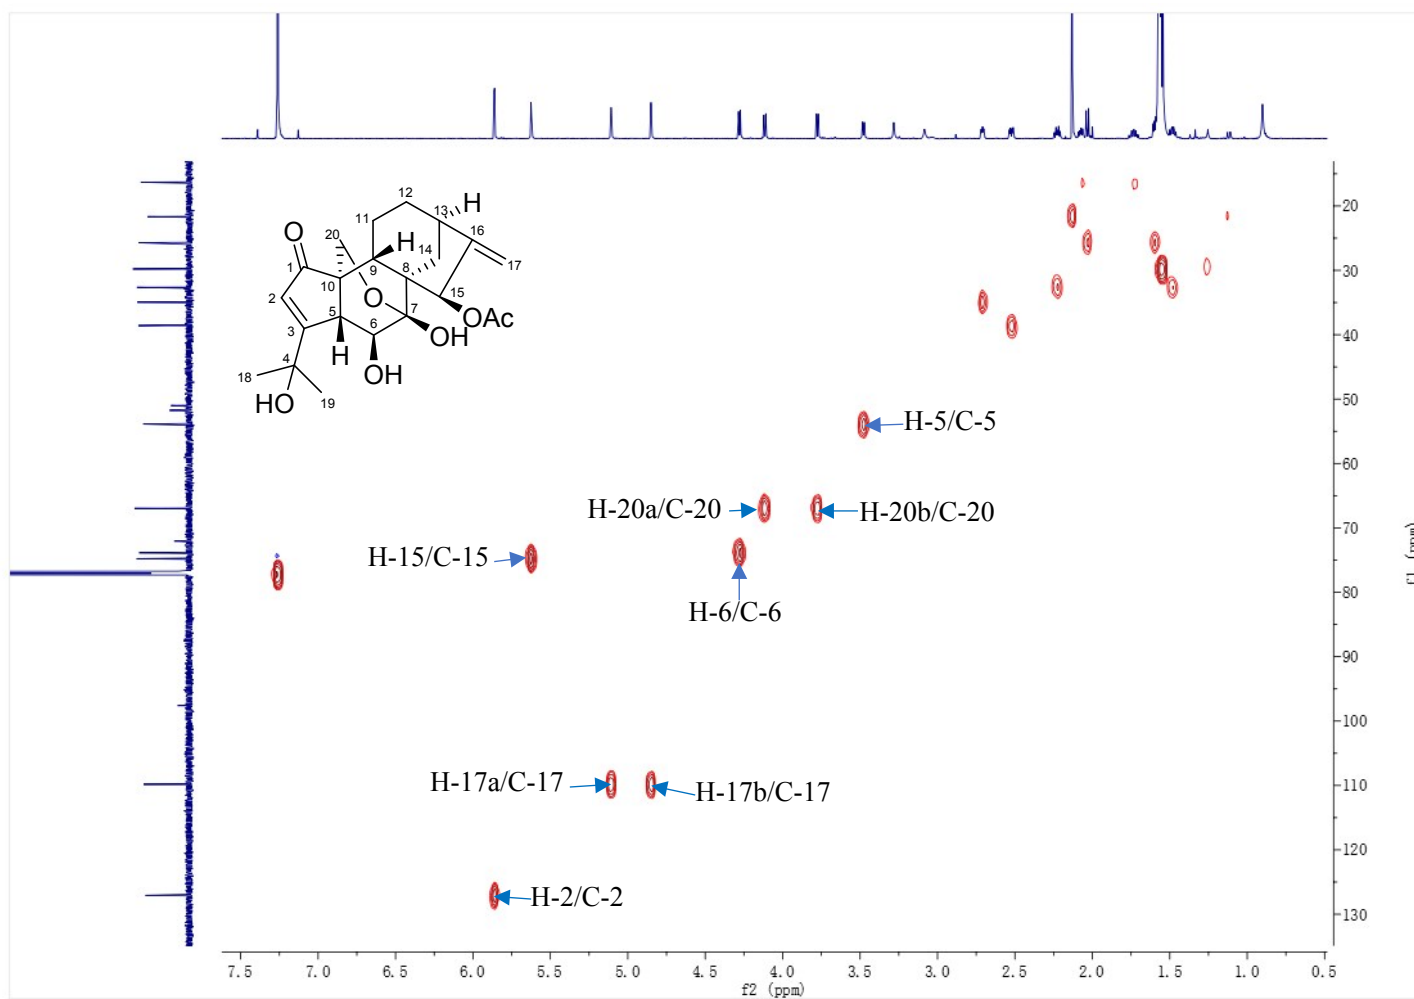

**Figure S41** HSQC spectrum ( $\text{CDCl}_3$ , 800MHz) of maericalysin A (**1**).

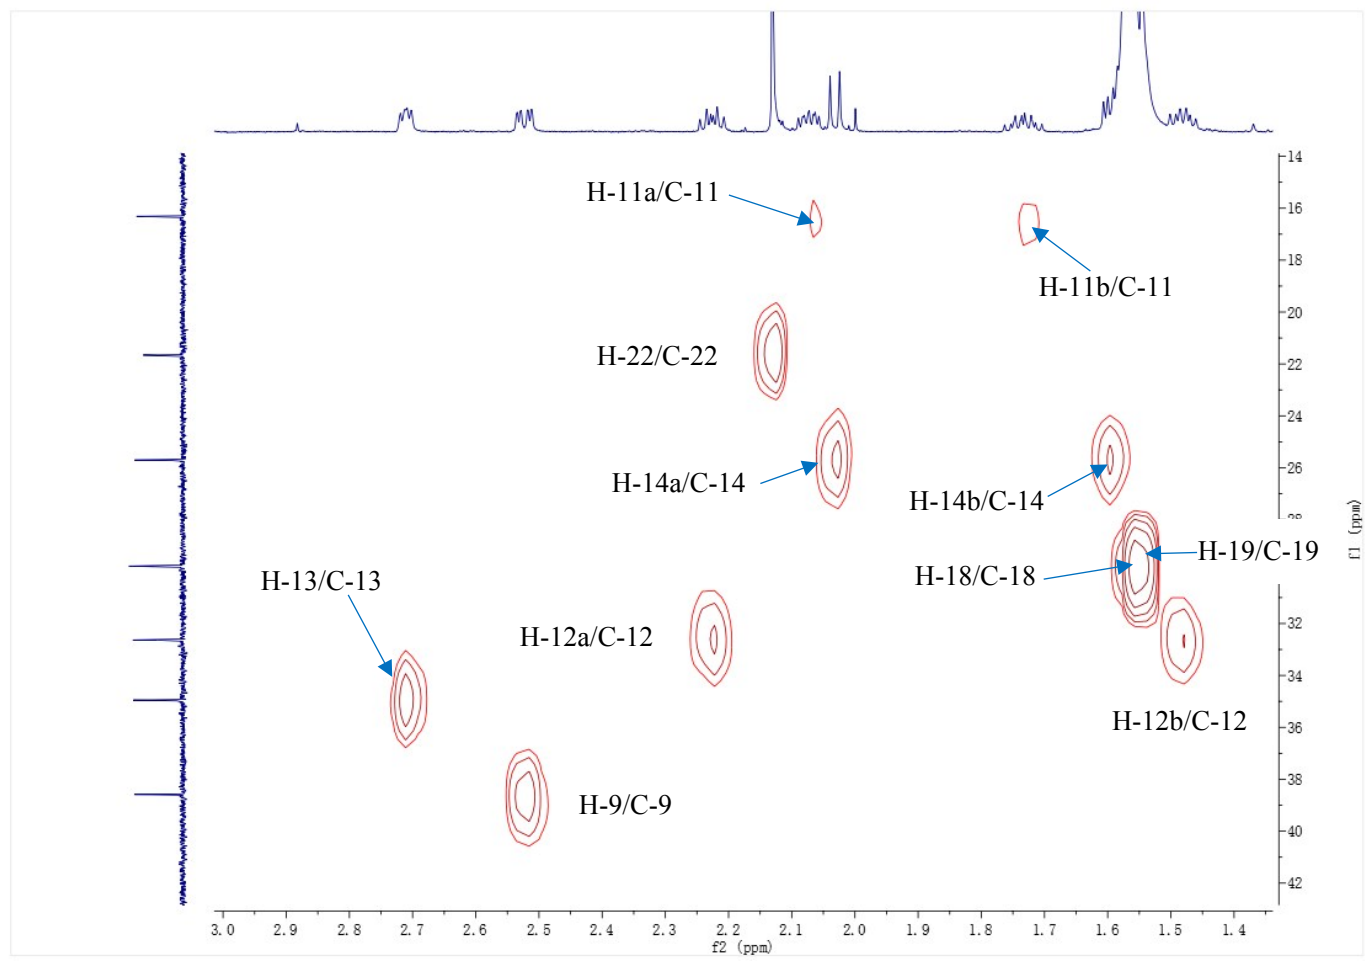

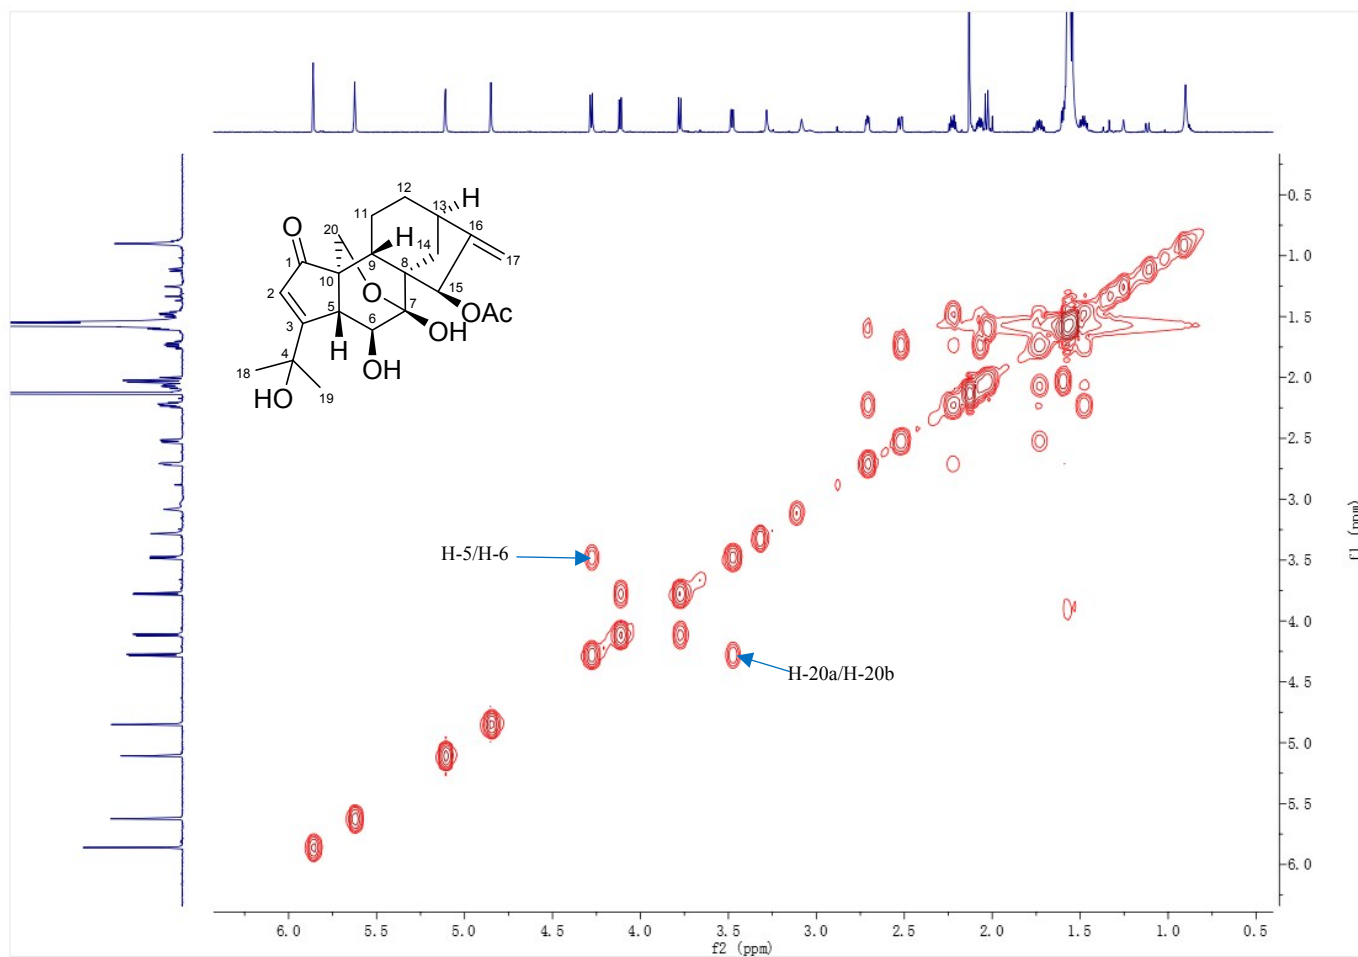

**Figure S42**  $^1\text{H}$ - $^1\text{H}$  COSY spectrum ( $\text{CDCl}_3$ , 800MHz) of maoericalysin A (1).

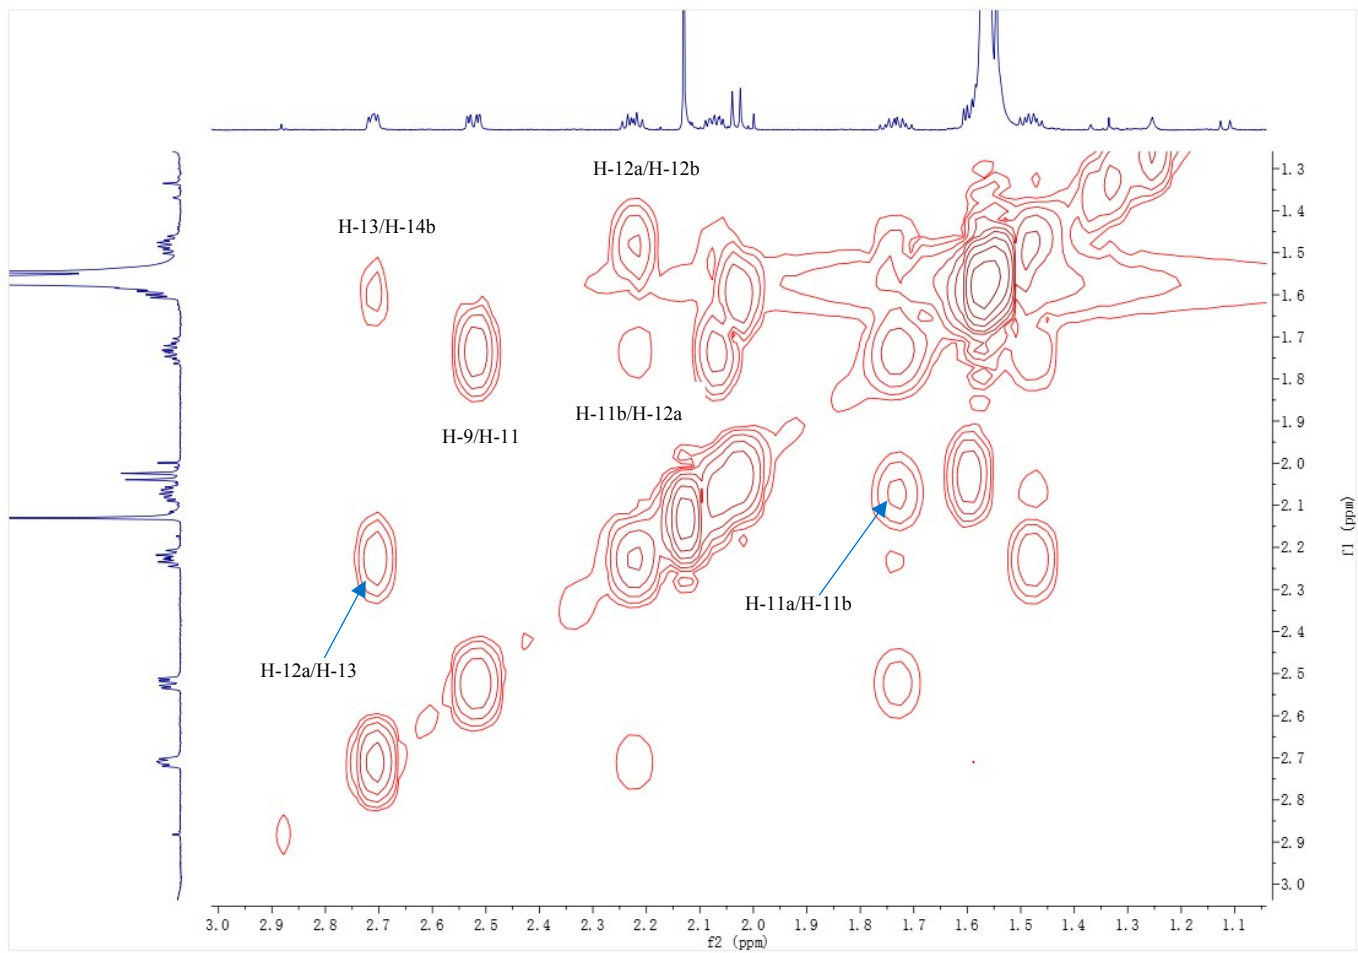

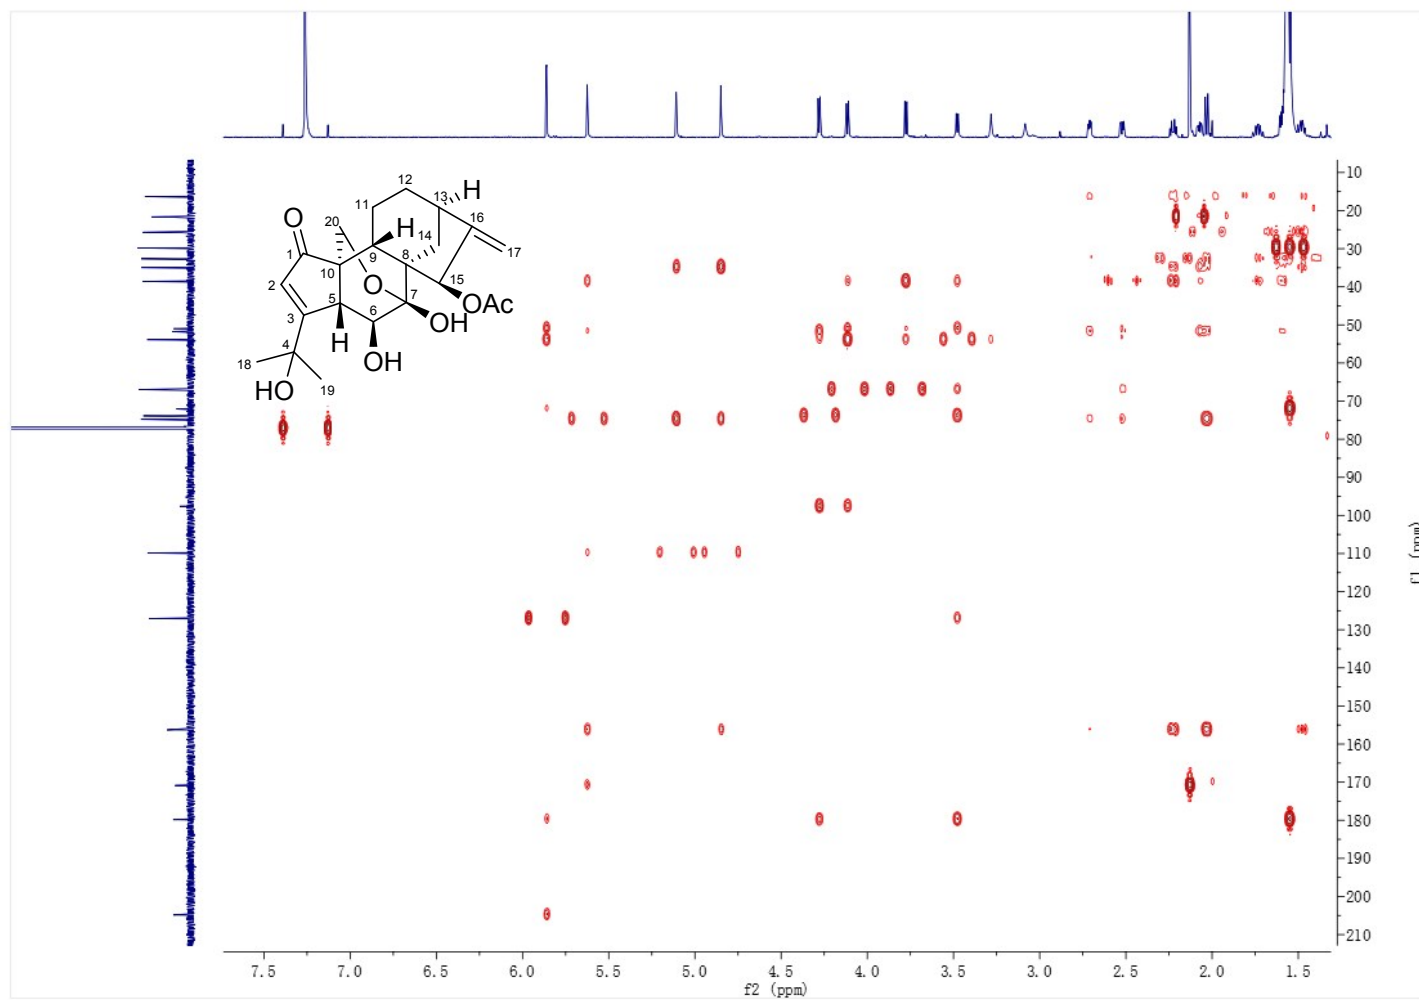

**Figure S43** HMBC spectrum (CDCl<sub>3</sub>, 800MHz) of maericalysin A (**1**).

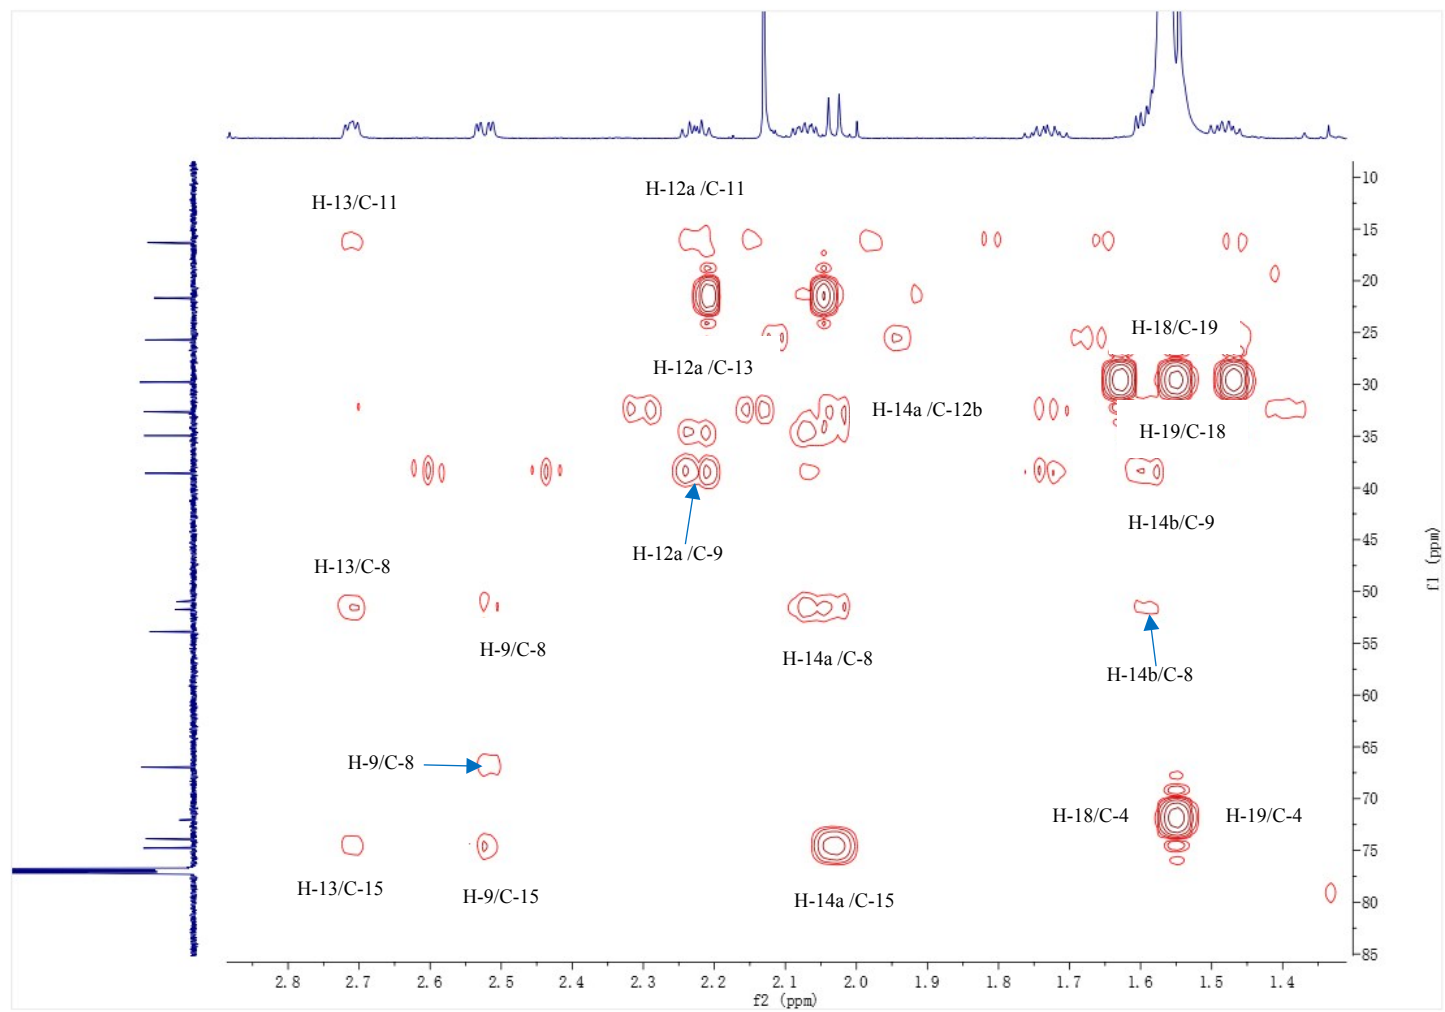

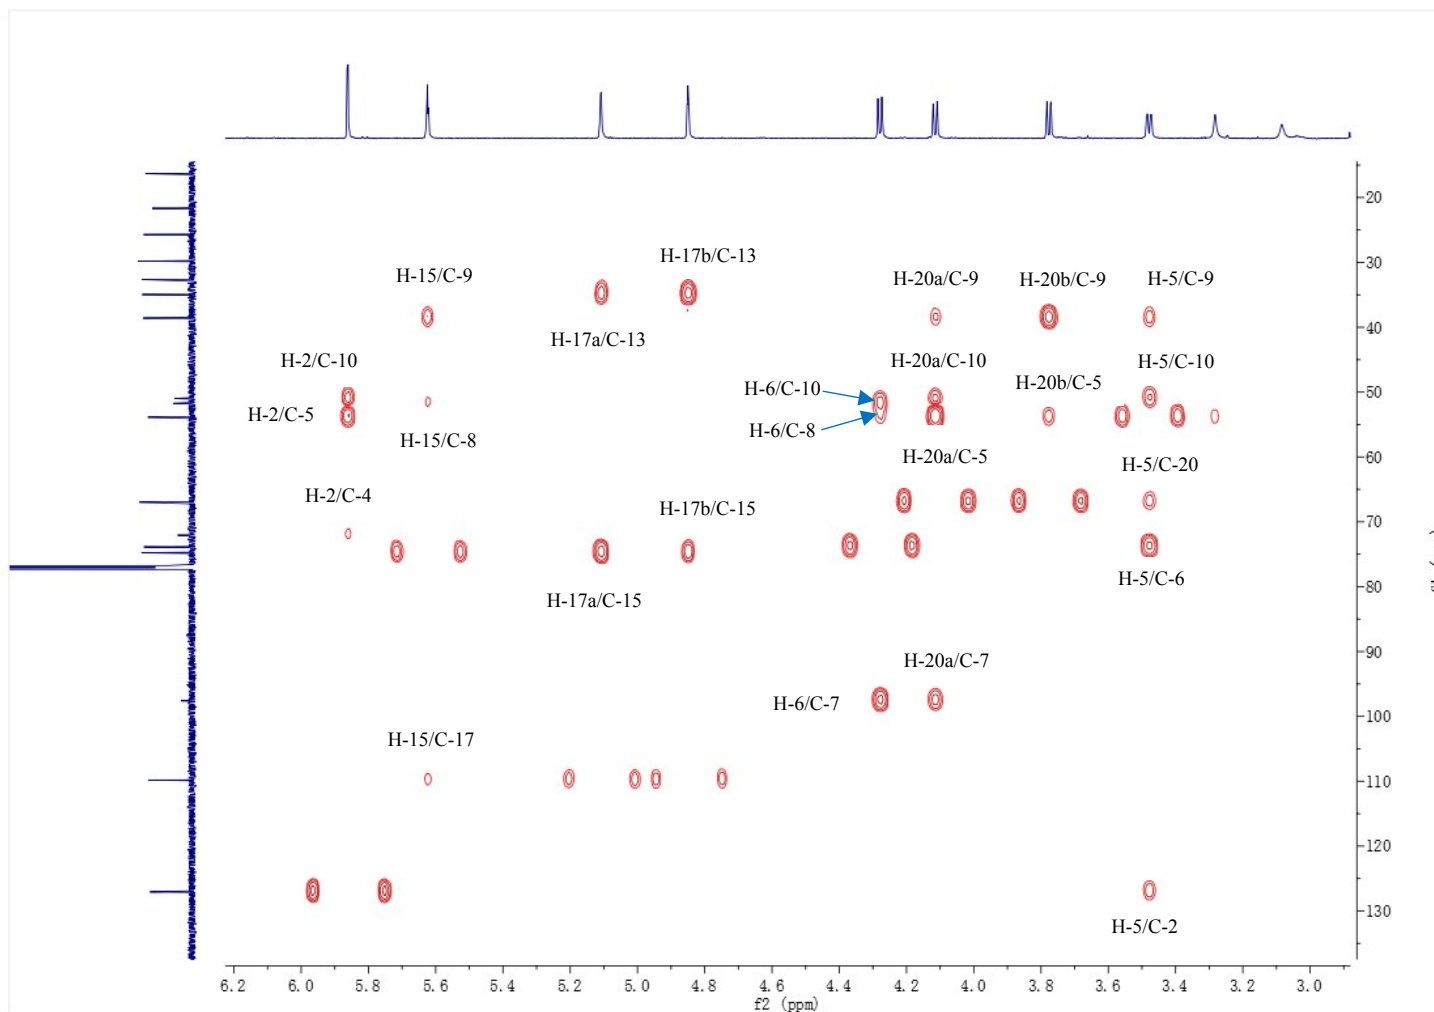

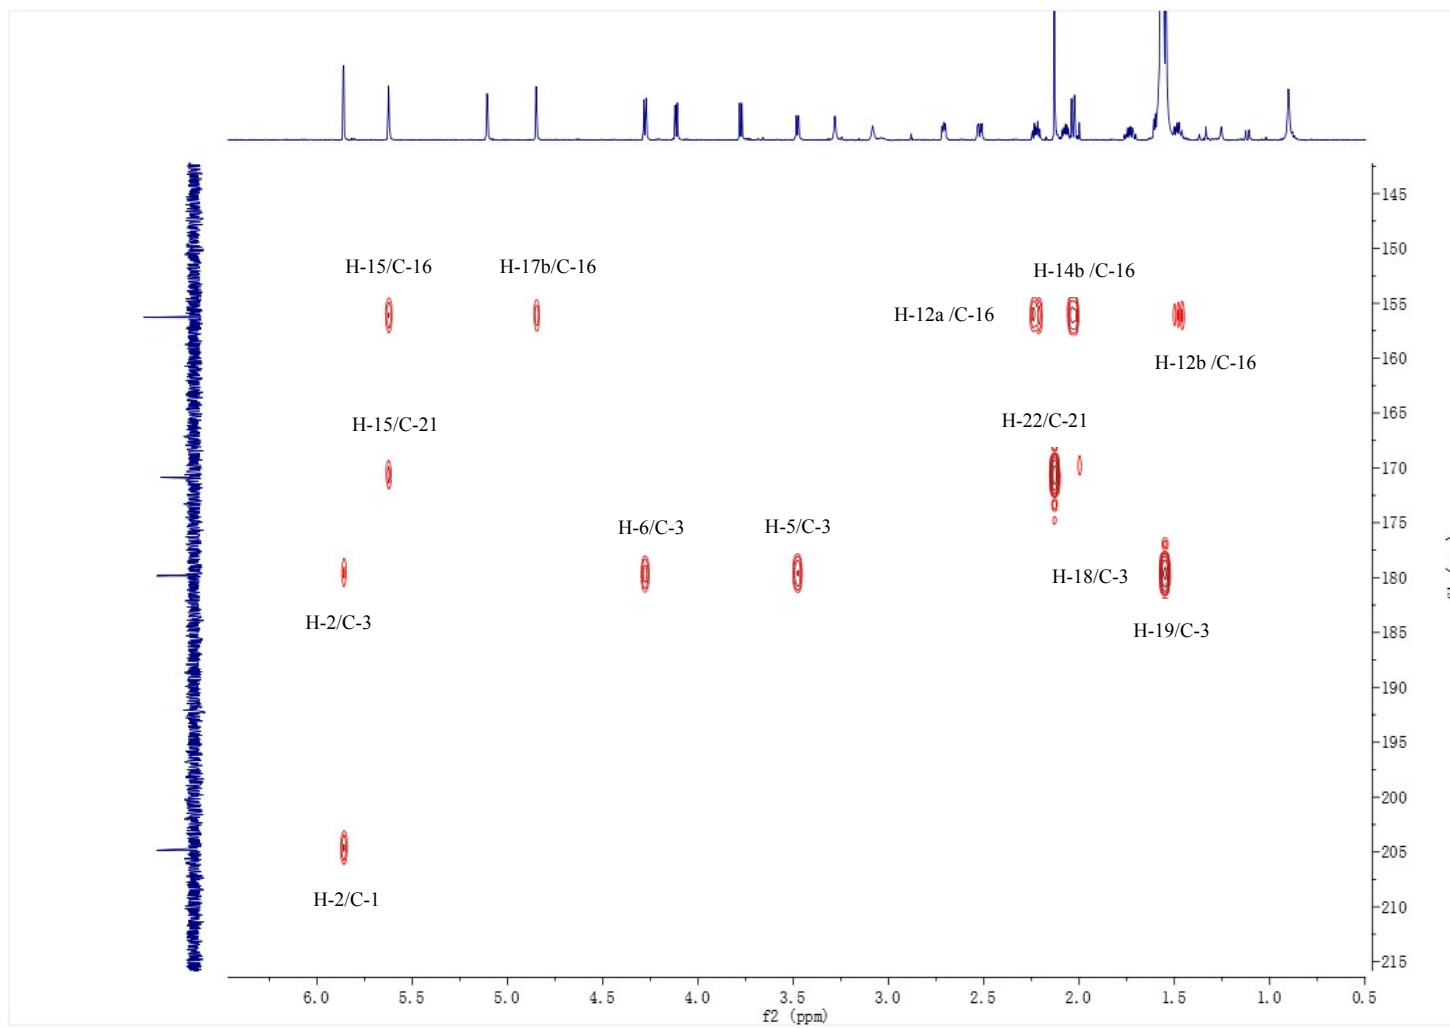



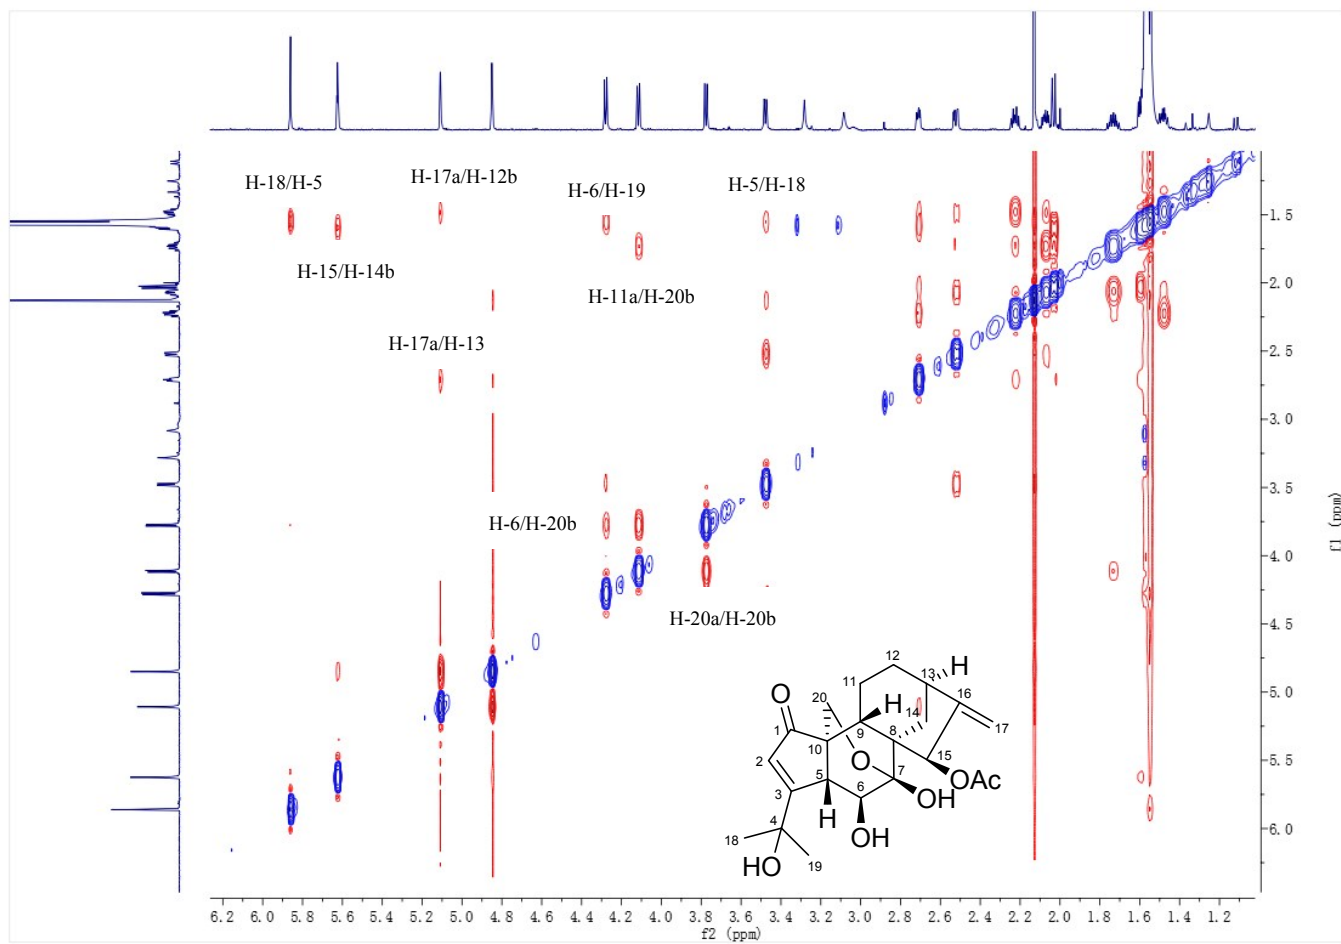

**Figure S44** ROESY spectrum ( $\text{CDCl}_3$ , 800MHz) of maoericalysin A (**1**).

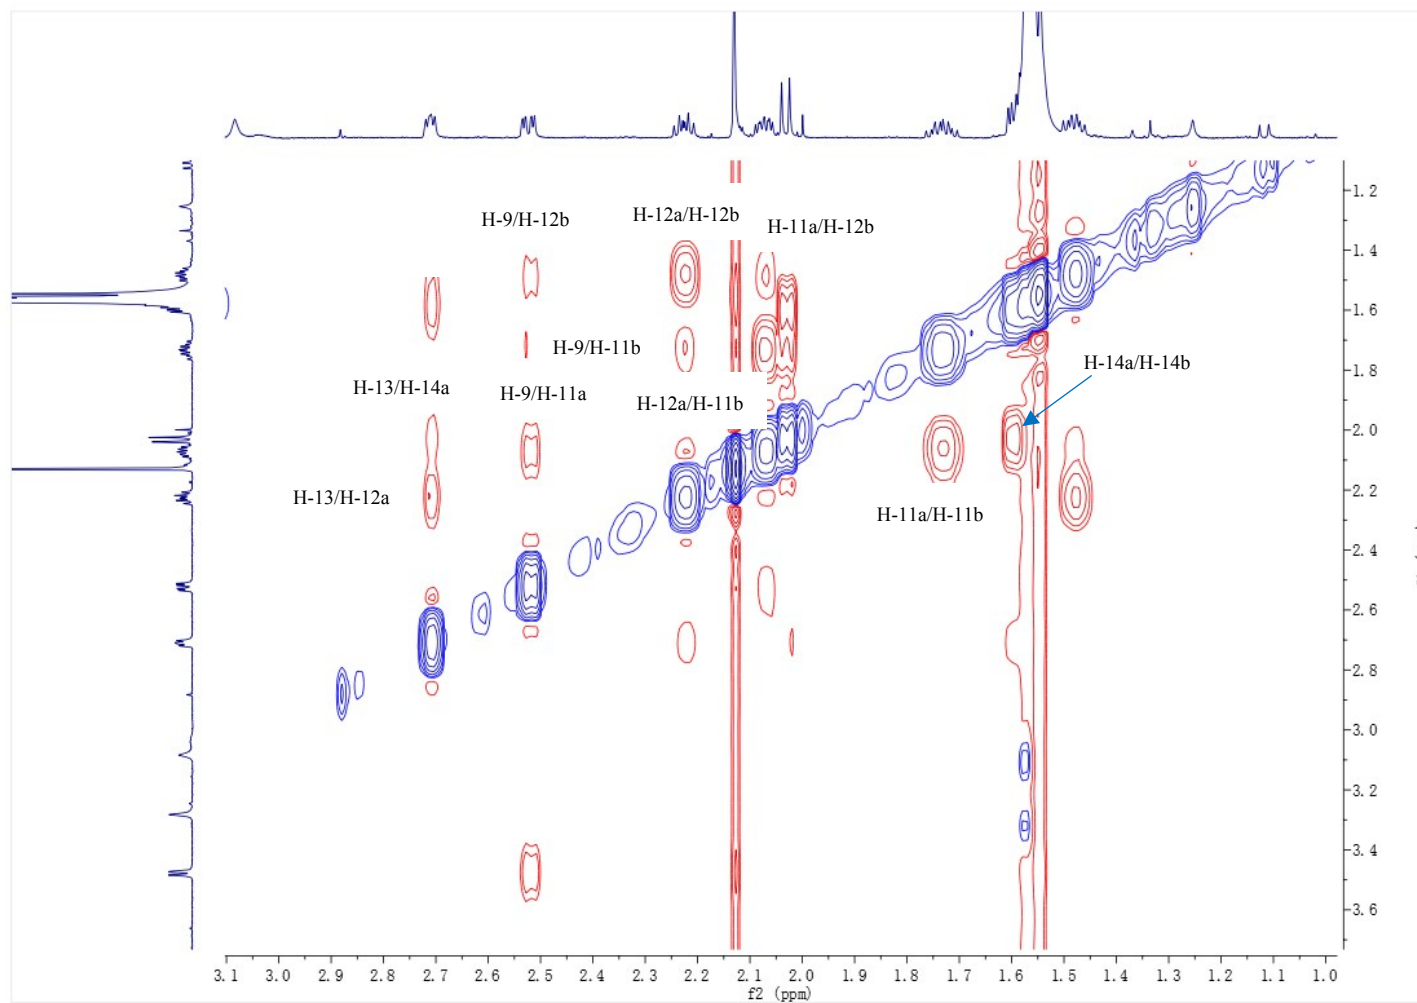

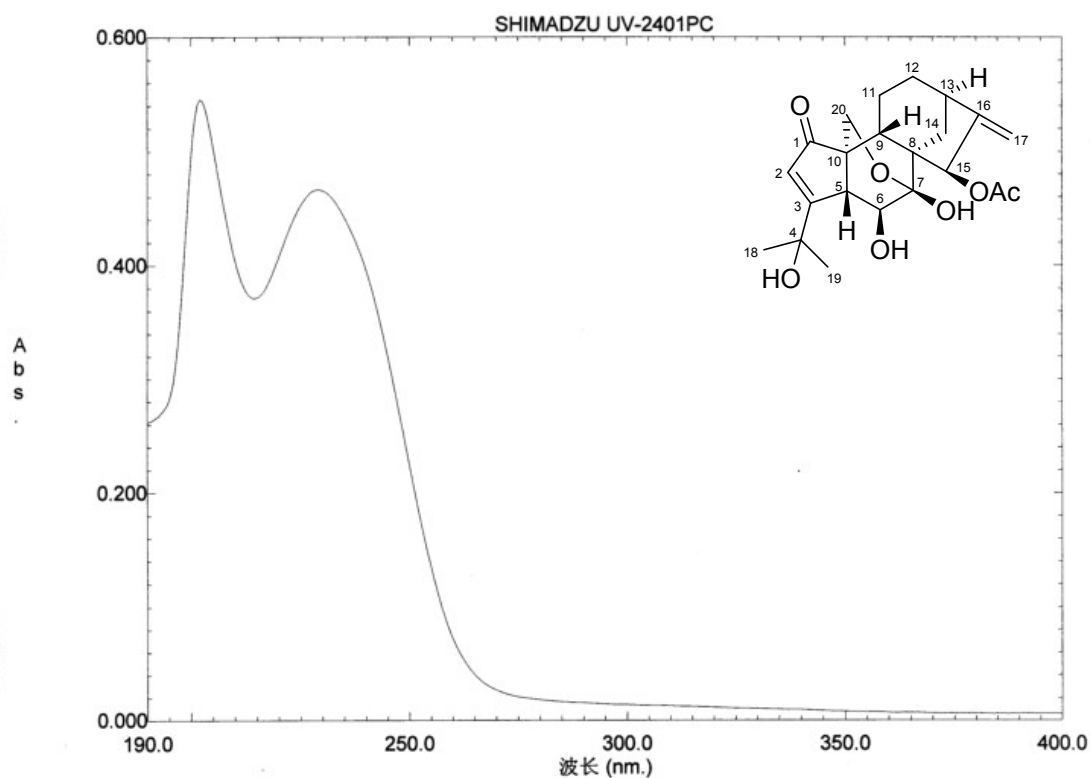

文件名: SIE-57

SIE-57

创建于: 09:54 17-09-25  
数据: 原始

样品浓度: 0.0204毫克/毫升  
溶剂: 甲醇

测量模式: Abs.  
扫描速度: 中速  
狭缝: 5.0  
采样间隔: 0.5

| 否. | 波长 (nm.) | Abs.   |
|----|----------|--------|
| 1  | 229.00   | 0.4662 |
| 2  | 202.00   | 0.5452 |

Figure S45 UV spectrum of maericalysin A (1).

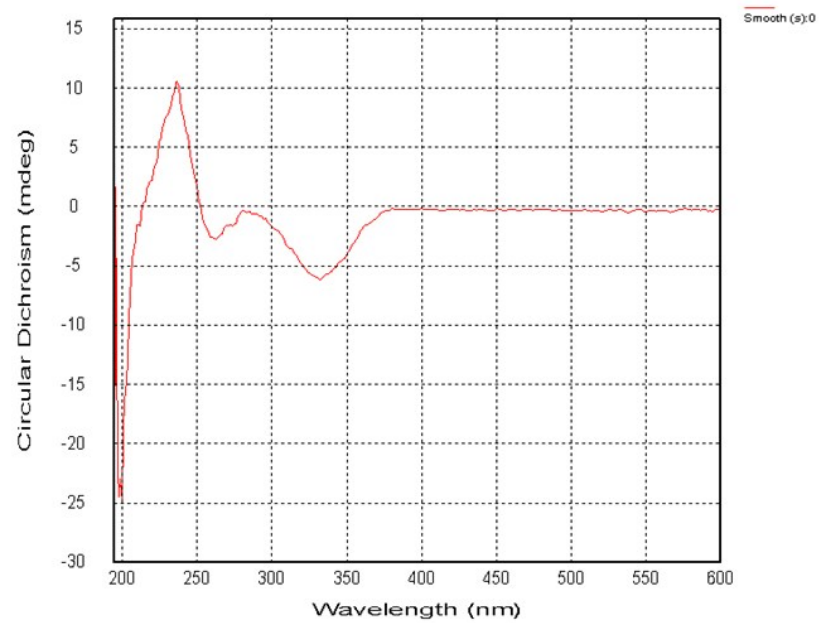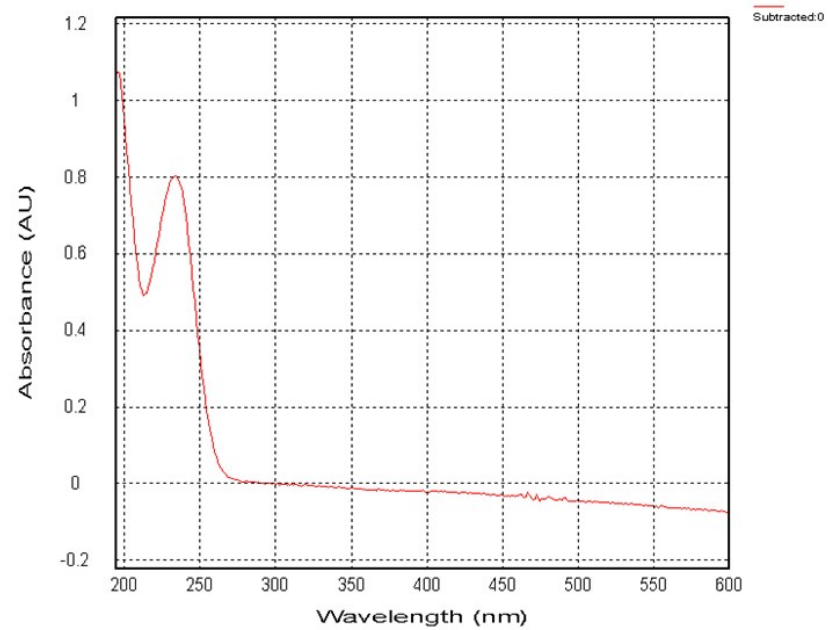

**Figure S46** CD spectrum of maericalysin A (**1**).

Optical rotation measurement

Model : P-1020 (A060460638)

| No.  | Sample   | Mode   | Data      | Monitor<br>Blank  | Temp.<br>Cell<br>Temp Point | Date<br>Comment<br>Sample Name                         | Light<br>Filter<br>Operator | Cycle Time<br>Integ Time |
|------|----------|--------|-----------|-------------------|-----------------------------|--------------------------------------------------------|-----------------------------|--------------------------|
| No.1 | 20 (1/3) | Sp.Rot | -110.0000 | -0.0275<br>0.0000 | 24.1<br>50.00<br>Cell       | Wed Sep 20 09:25:30 2017<br>0.00050g/mL MeOH<br>SIE-57 | Na<br>589nm                 | 2 sec<br>2 sec           |
| No.2 | 20 (2/3) | Sp.Rot | -120.0000 | -0.0300<br>0.0000 | 24.1<br>50.00<br>Cell       | Wed Sep 20 09:25:36 2017<br>0.00050g/mL MeOH<br>SIE-57 | Na<br>589nm                 | 2 sec<br>2 sec           |
| No.3 | 20 (3/3) | Sp.Rot | -118.0000 | -0.0295<br>0.0000 | 24.1<br>50.00<br>Cell       | Wed Sep 20 09:25:41 2017<br>0.00050g/mL MeOH<br>SIE-57 | Na<br>589nm                 | 2 sec<br>2 sec           |
| No.4 | 21 (1/3) | Sp.Rot | -107.2000 | -0.0268<br>0.0000 | 24.1<br>50.00<br>Cell       | Wed Sep 20 09:25:51 2017<br>0.00050g/mL MeOH<br>SIE-57 | Na<br>589nm                 | 2 sec<br>2 sec           |
| No.5 | 21 (2/3) | Sp.Rot | -126.8000 | -0.0317<br>0.0000 | 24.1<br>50.00<br>Cell       | Wed Sep 20 09:25:56 2017<br>0.00050g/mL MeOH<br>SIE-57 | Na<br>589nm                 | 2 sec<br>2 sec           |
| No.6 | 21 (3/3) | Sp.Rot | -111.2000 | -0.0278<br>0.0000 | 24.0<br>50.00<br>Cell       | Wed Sep 20 09:26:02 2017<br>0.00050g/mL MeOH<br>SIE-57 | Na<br>589nm                 | 2 sec<br>2 sec           |

- 115. 7557 °

Figure S47 OR spectrum of maericalysin A (1).

## 9.2 HRESIMS, NMR, UV, CD and OR spectra of maericalysin B (2)

### Qualitative Analysis Report

|                               |                             |                      |                      |
|-------------------------------|-----------------------------|----------------------|----------------------|
| <b>Data Filename</b>          | Sie-14a.d                   | <b>Sample Name</b>   | Sie-14a              |
| <b>Sample Type</b>            | Sample                      | <b>Position</b>      | P1-A2                |
| <b>Instrument Name</b>        | Instrument 1                | <b>User Name</b>     |                      |
| <b>Acq Method</b>             | s.m                         | <b>Acquired Time</b> | 3/12/2018 4:21:49 PM |
| <b>IRM Calibration Status</b> |                             | <b>DA Method</b>     | Default.m            |
| <b>Comment</b>                |                             |                      |                      |
| <b>Sample Group</b>           |                             | <b>Info.</b>         |                      |
| <b>Acquisition SW</b>         | 6200 series TOF/6500 series |                      |                      |
| <b>Version</b>                | Q-TOF B.05.01 (B5125.2)     |                      |                      |

### User Spectra

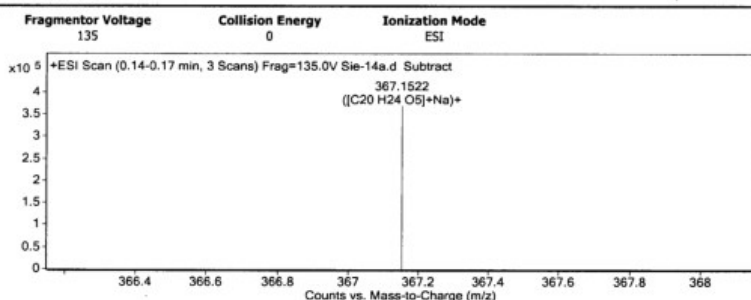

### Peak List

| m/z      | z | Abund     | Formula                                        | Ion                 |
|----------|---|-----------|------------------------------------------------|---------------------|
| 274.2743 | 1 | 166227.17 |                                                |                     |
| 290.2691 | 1 | 78980.37  |                                                |                     |
| 318.3002 | 1 | 95284.89  |                                                |                     |
| 327.1594 | 1 | 70240.45  |                                                |                     |
| 367.1522 | 1 | 370167.84 | C <sub>20</sub> H <sub>24</sub> O <sub>5</sub> | (M+Na) <sup>+</sup> |
| 368.155  | 1 | 73732.25  | C <sub>20</sub> H <sub>24</sub> O <sub>5</sub> | (M+Na) <sup>+</sup> |
| 383.1258 | 1 | 150378.56 |                                                |                     |
| 711.3154 | 1 | 153961.94 |                                                |                     |

### Formula Calculator Element Limits

| Element | Min | Max |
|---------|-----|-----|
| C       | 3   | 60  |
| H       | 0   | 120 |
| O       | 0   | 30  |

### Formula Calculator Results

| Formula                                        | CalculatedMass | CalculatedMz | Mz       | Diff. (mDa) | Diff. (ppm) | DBE    |
|------------------------------------------------|----------------|--------------|----------|-------------|-------------|--------|
| C <sub>20</sub> H <sub>24</sub> O <sub>5</sub> | 344.1624       | 367.1516     | 367.1522 | -0.6        | -1.7        | 9.0000 |

--- End Of Report ---

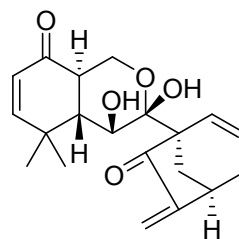

Figure S48 HRESIMS spectrum of maericalysin B (2).

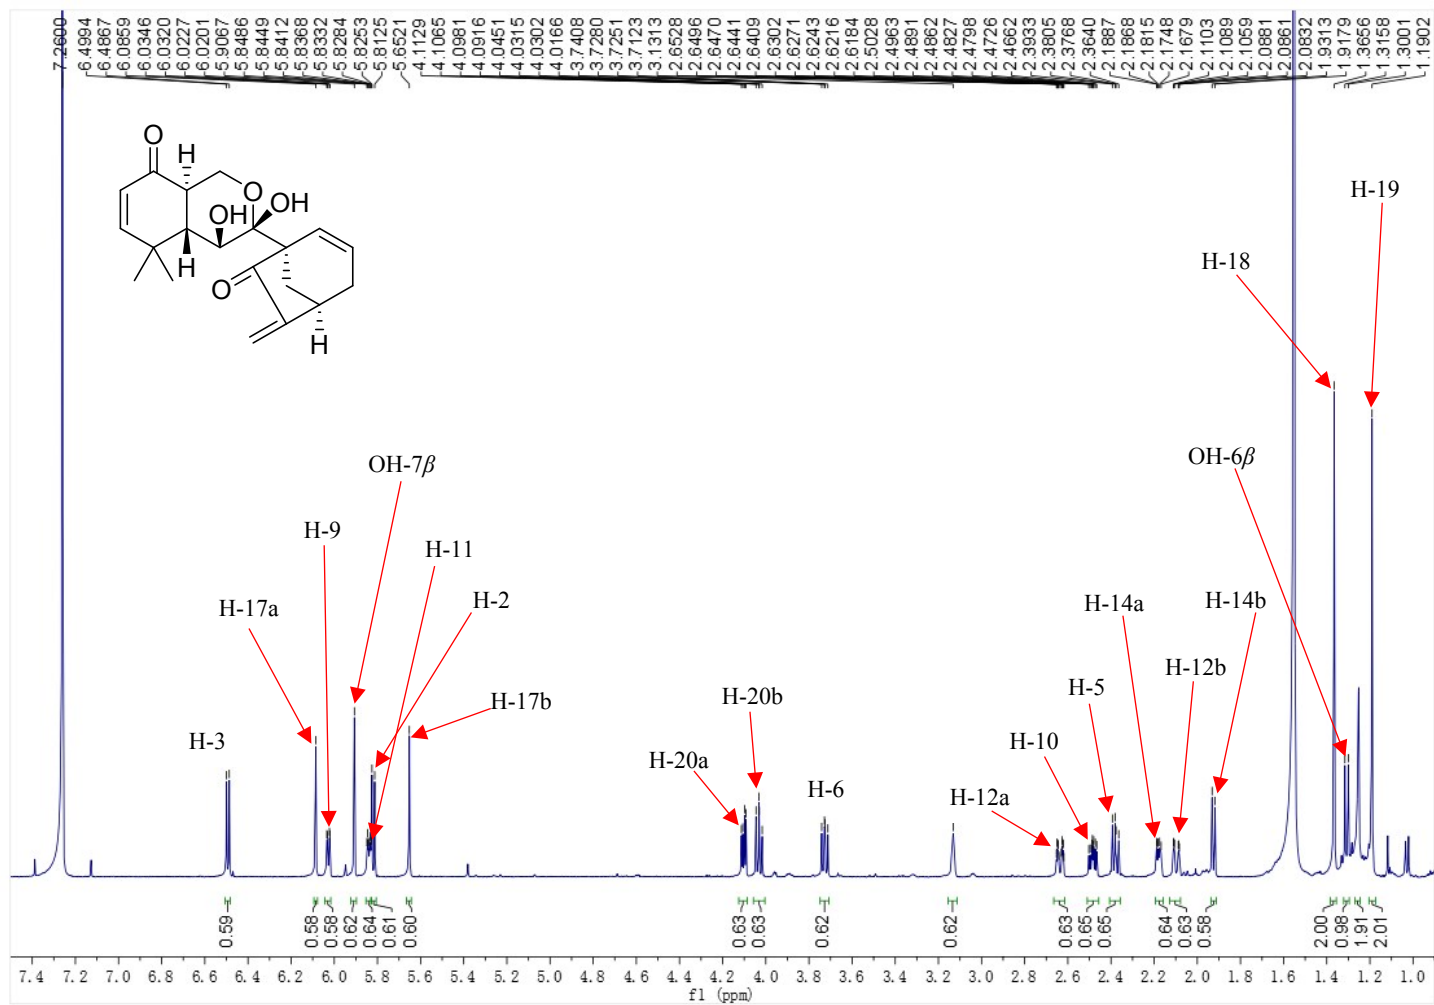

Figure S49 <sup>1</sup>H-NMR spectrum of maericalysin B (2).

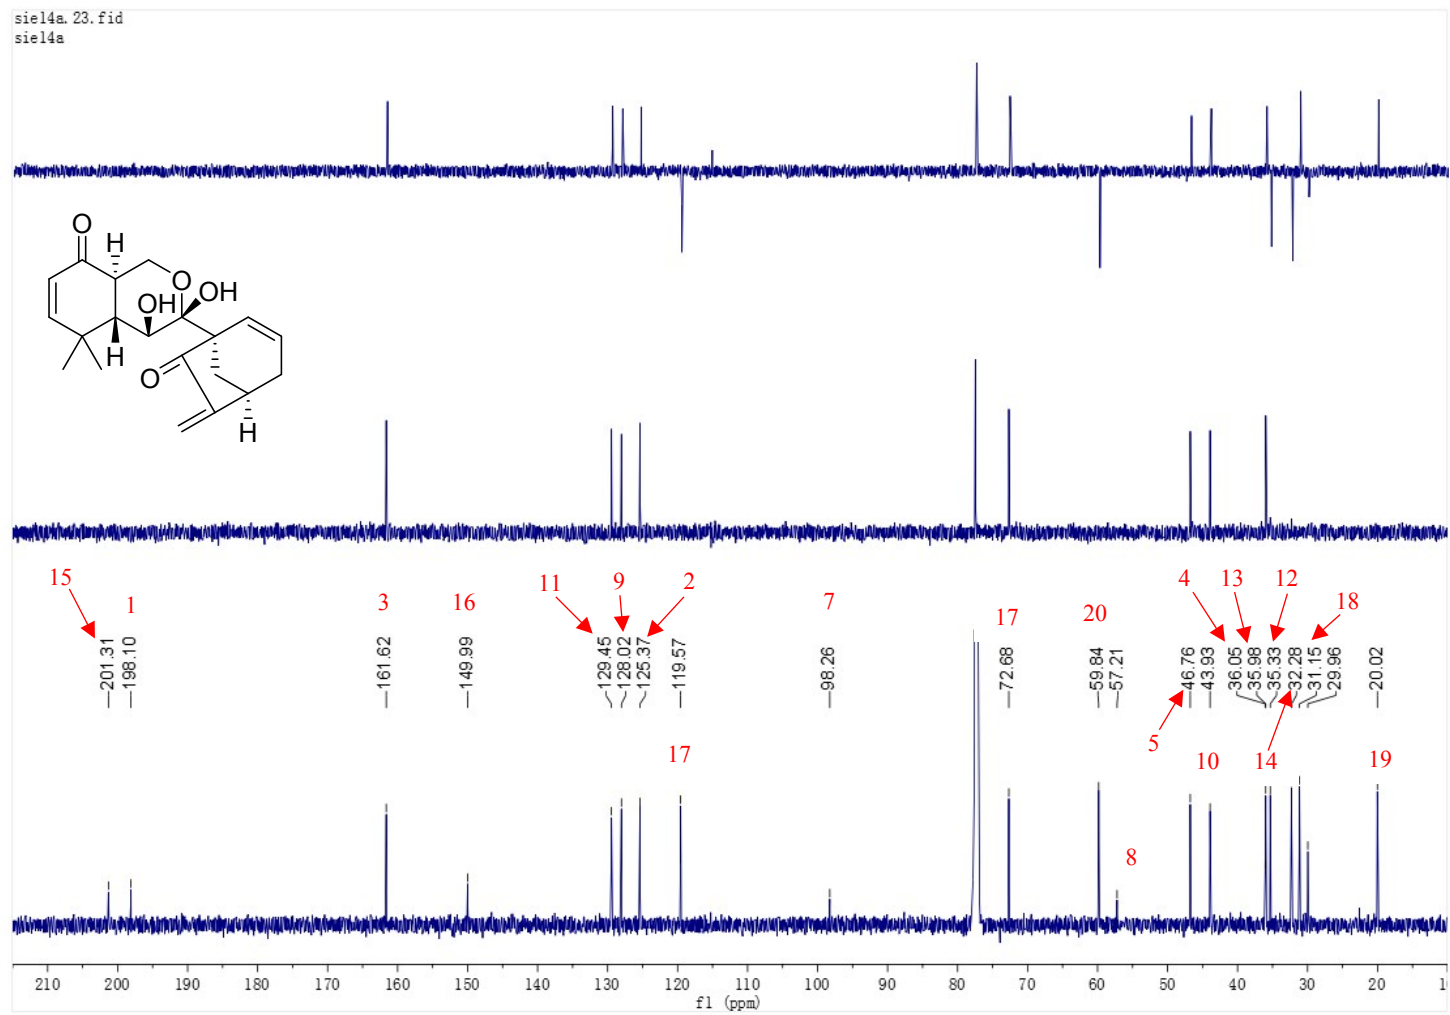

Figure S50  $^{13}\text{C}$  NMR spectrum (CDCl<sub>3</sub>, 800MHz) of maoericalysin B (2).



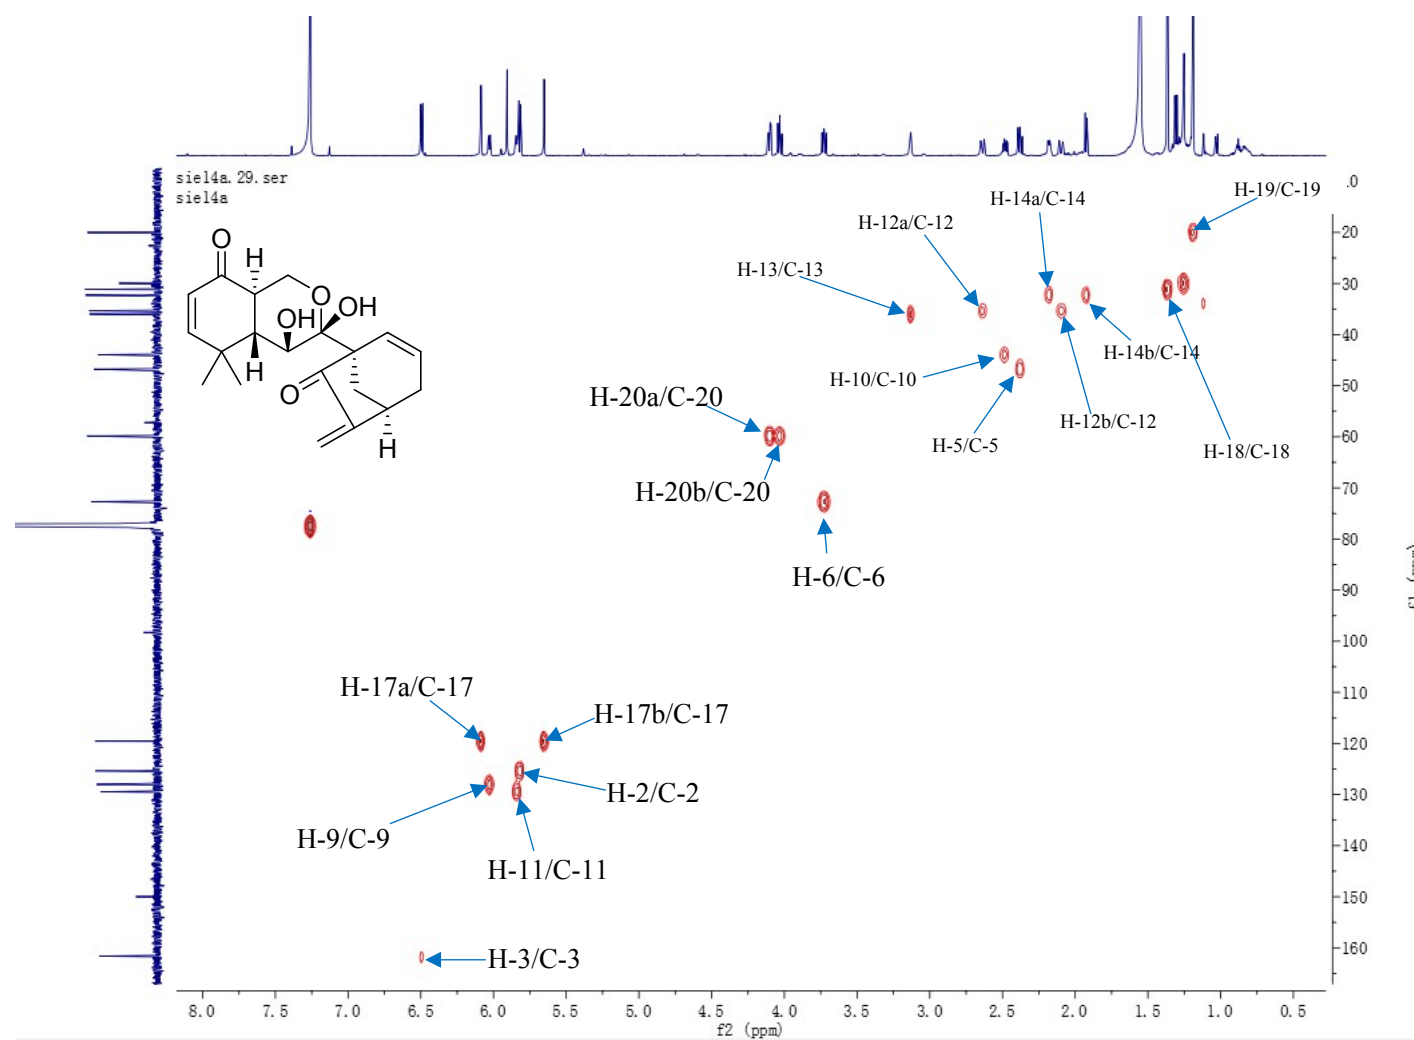

Figure S51 HSQC spectrum ( $\text{CDCl}_3$ , 800MHz) of maericalysin B (2).

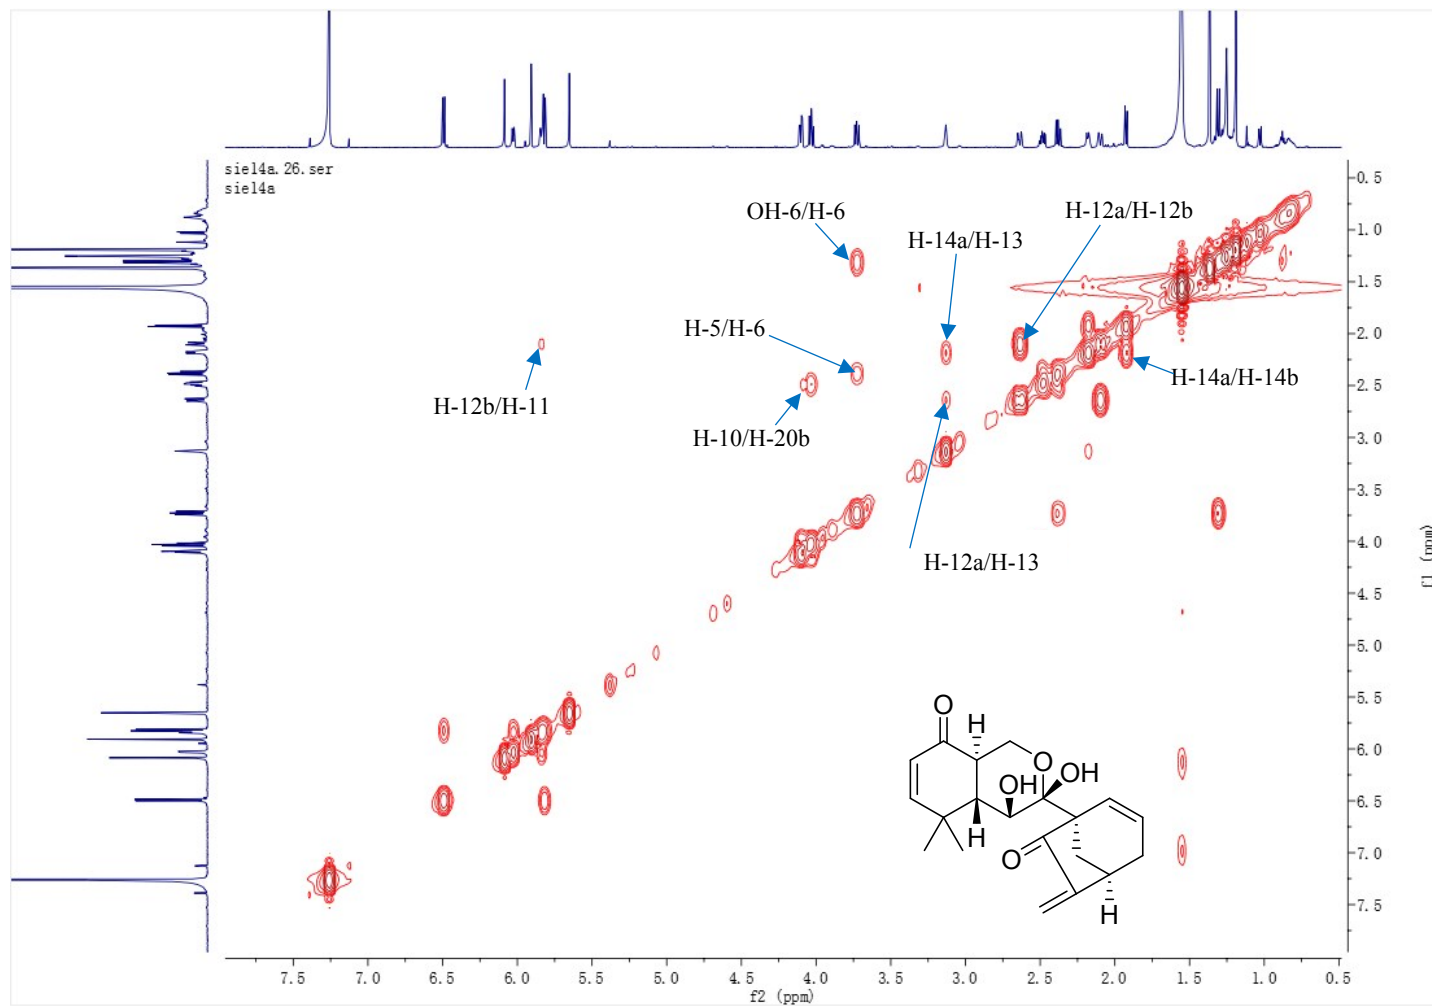

**Figure S52**  $^1\text{H}$ - $^1\text{H}$  COSY spectrum ( $\text{CDCl}_3$ , 800MHz) of maoericalysin B (**2**).

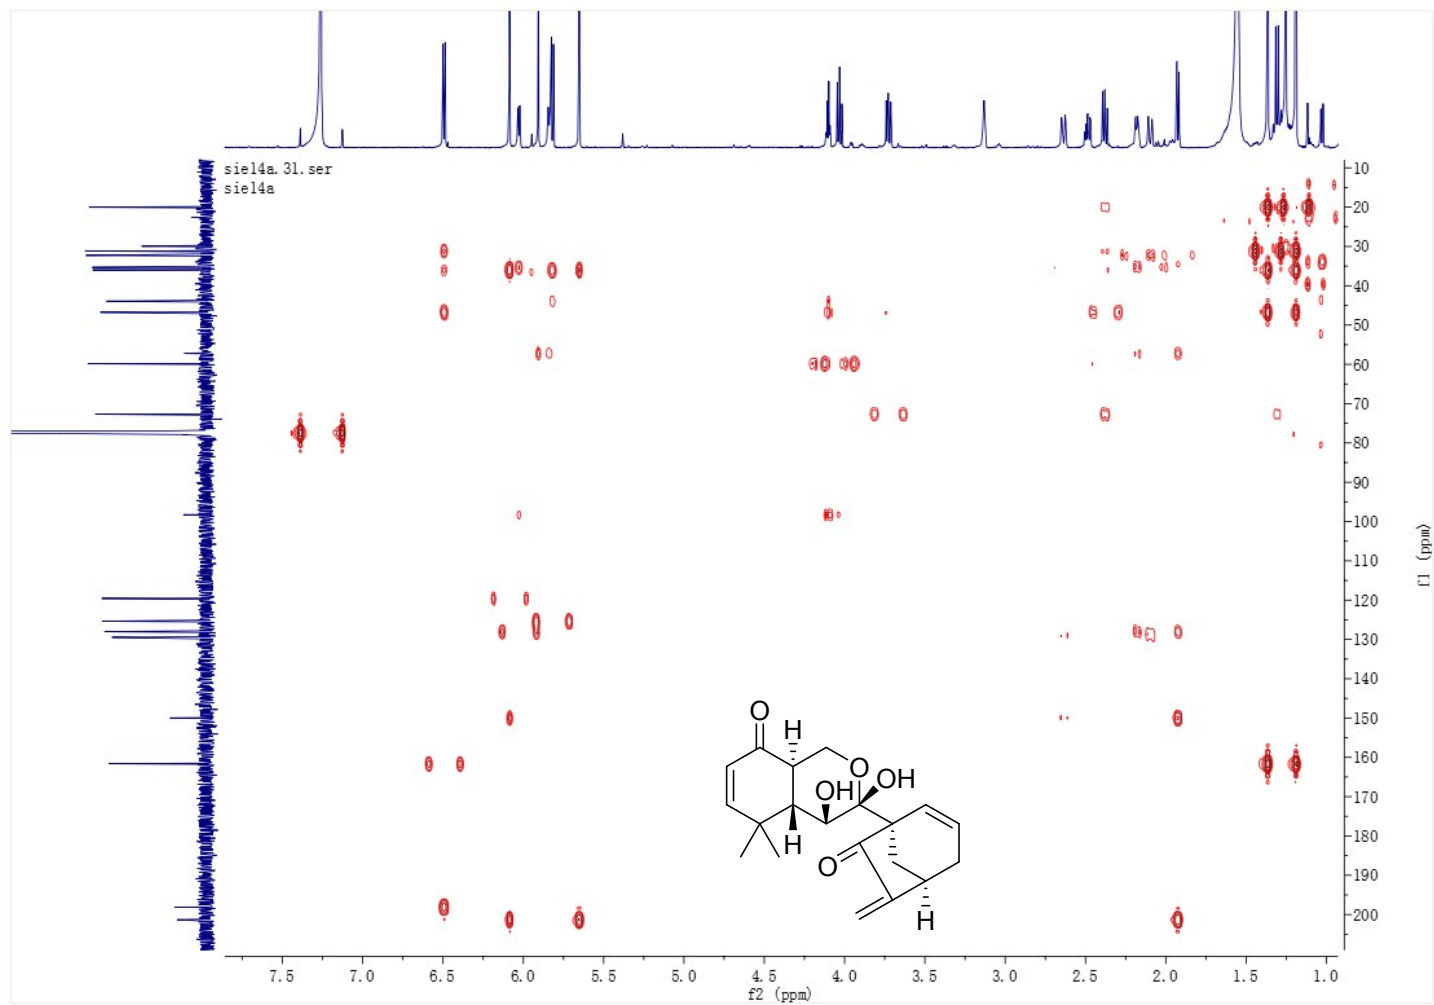

**Figure S53** HMBC spectrum ( $\text{CDCl}_3$ , 800MHz) of maoericalysin B (**2**).

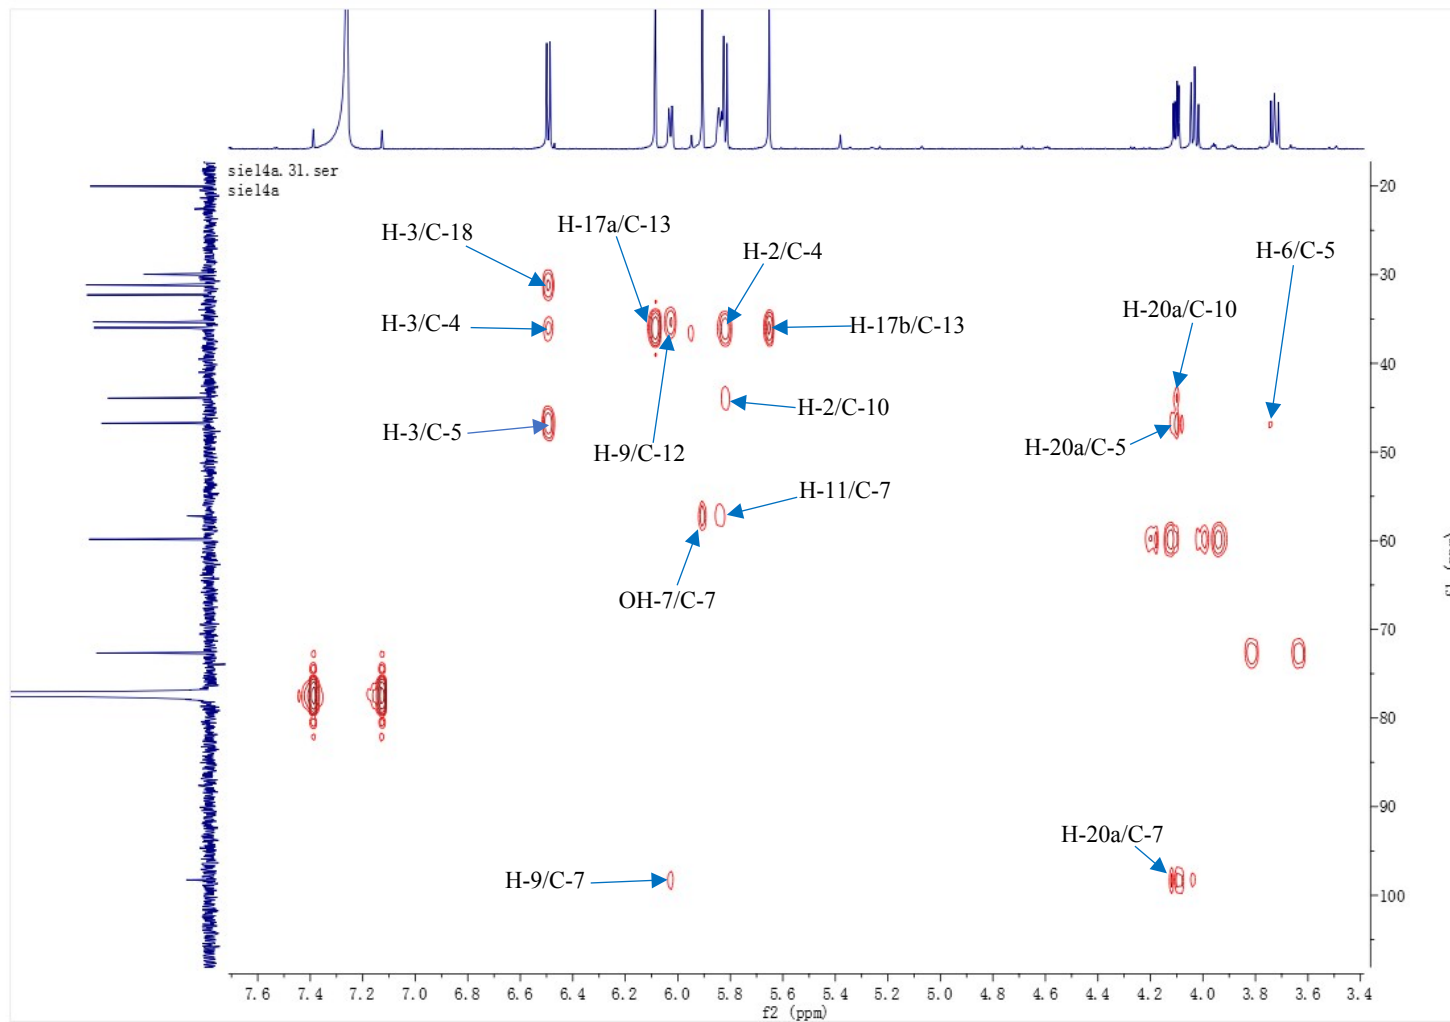

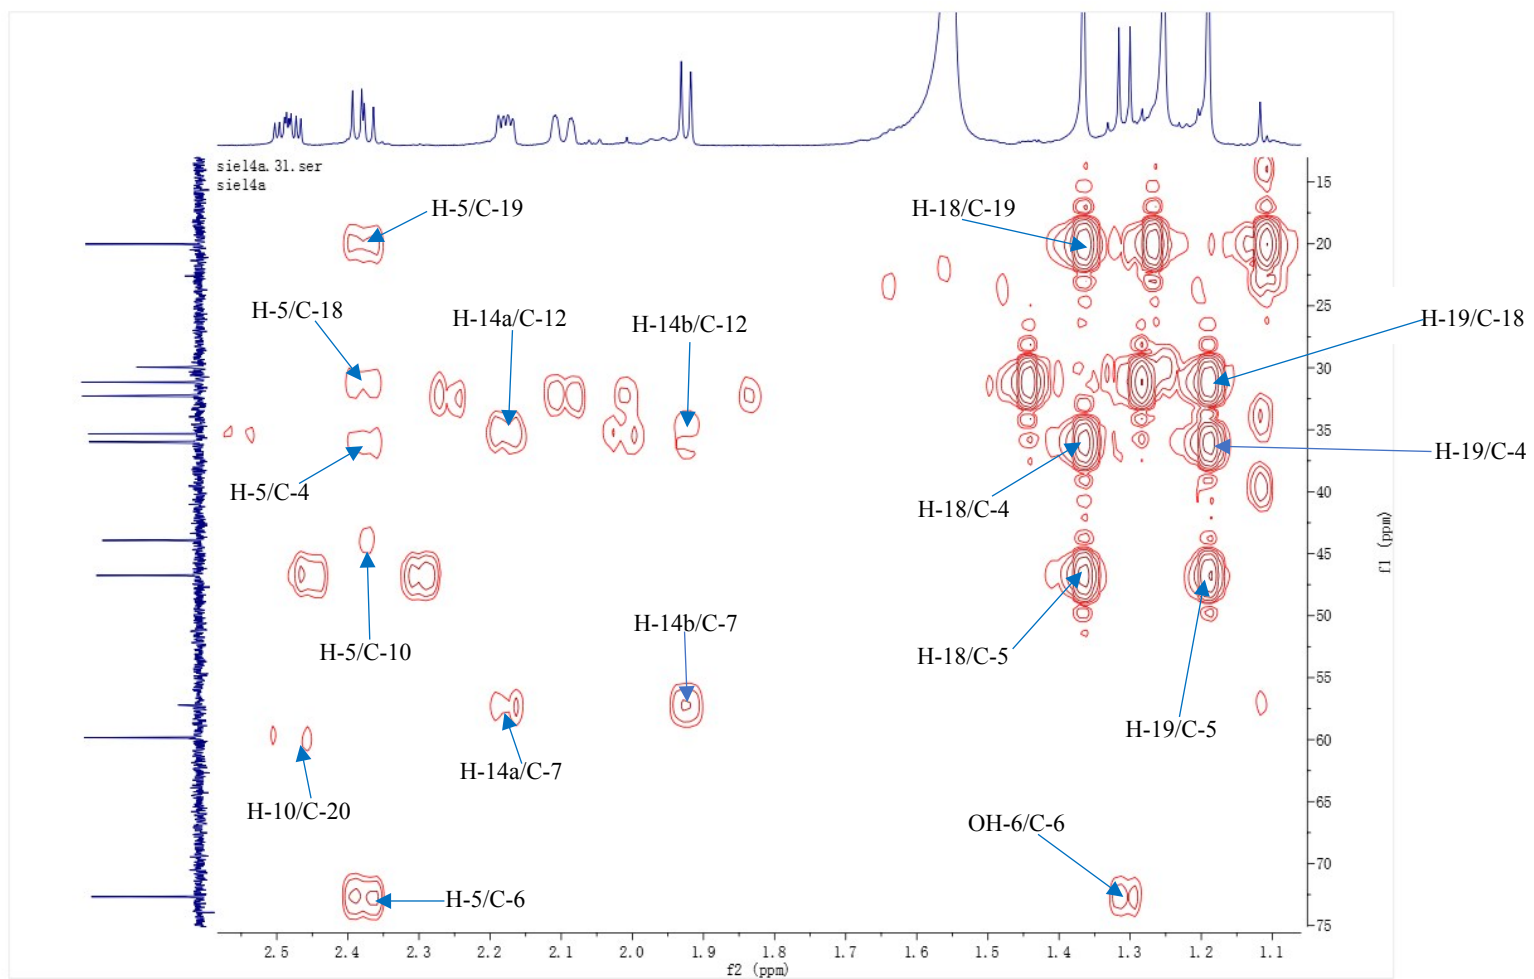

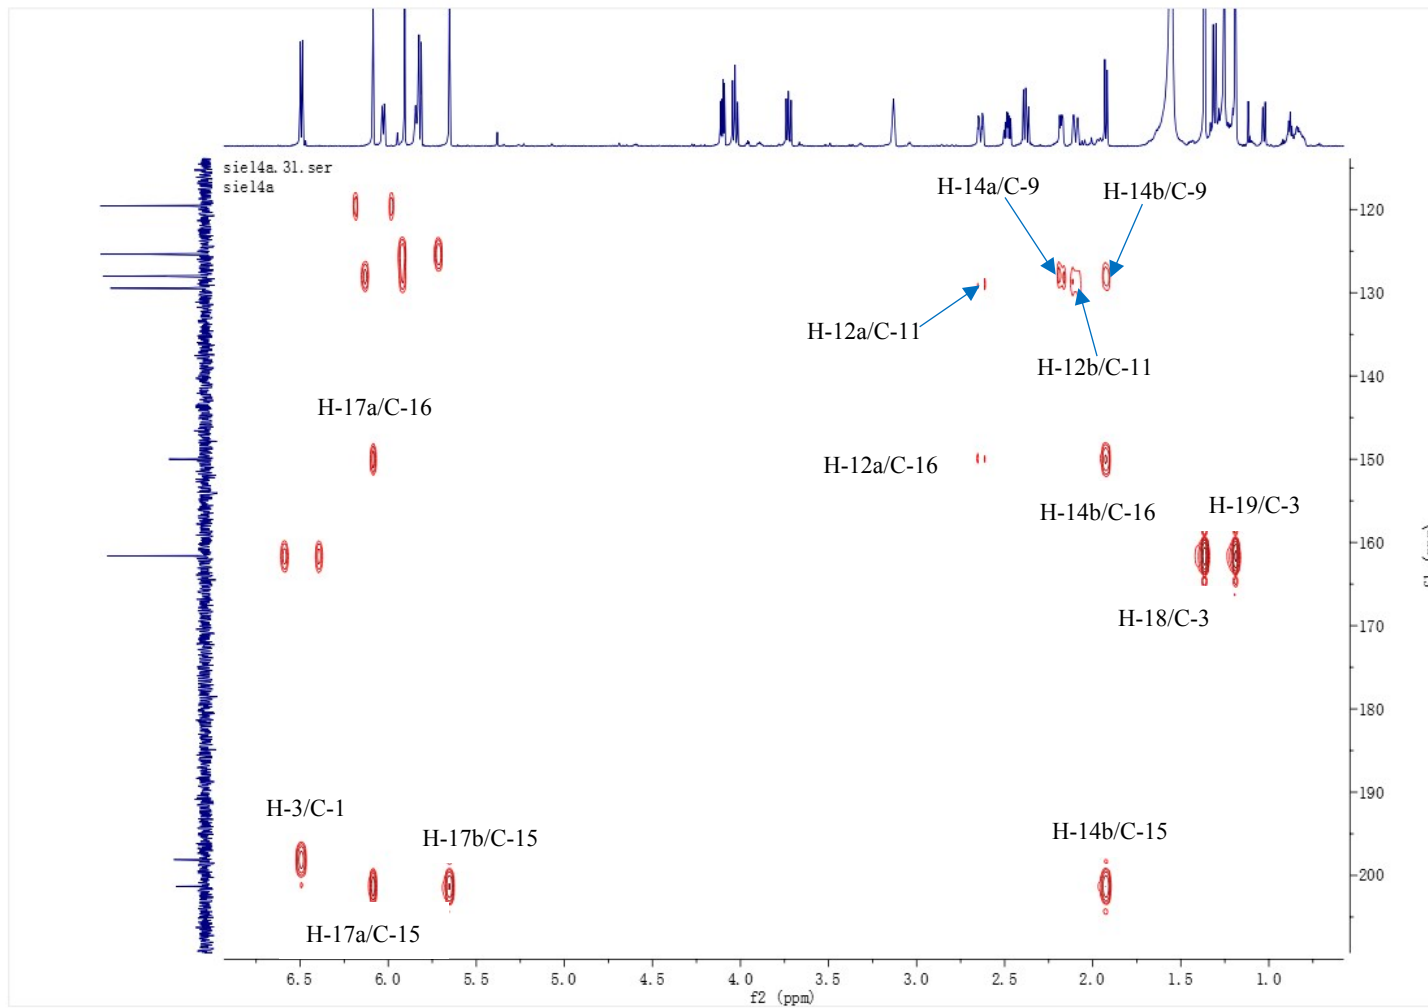

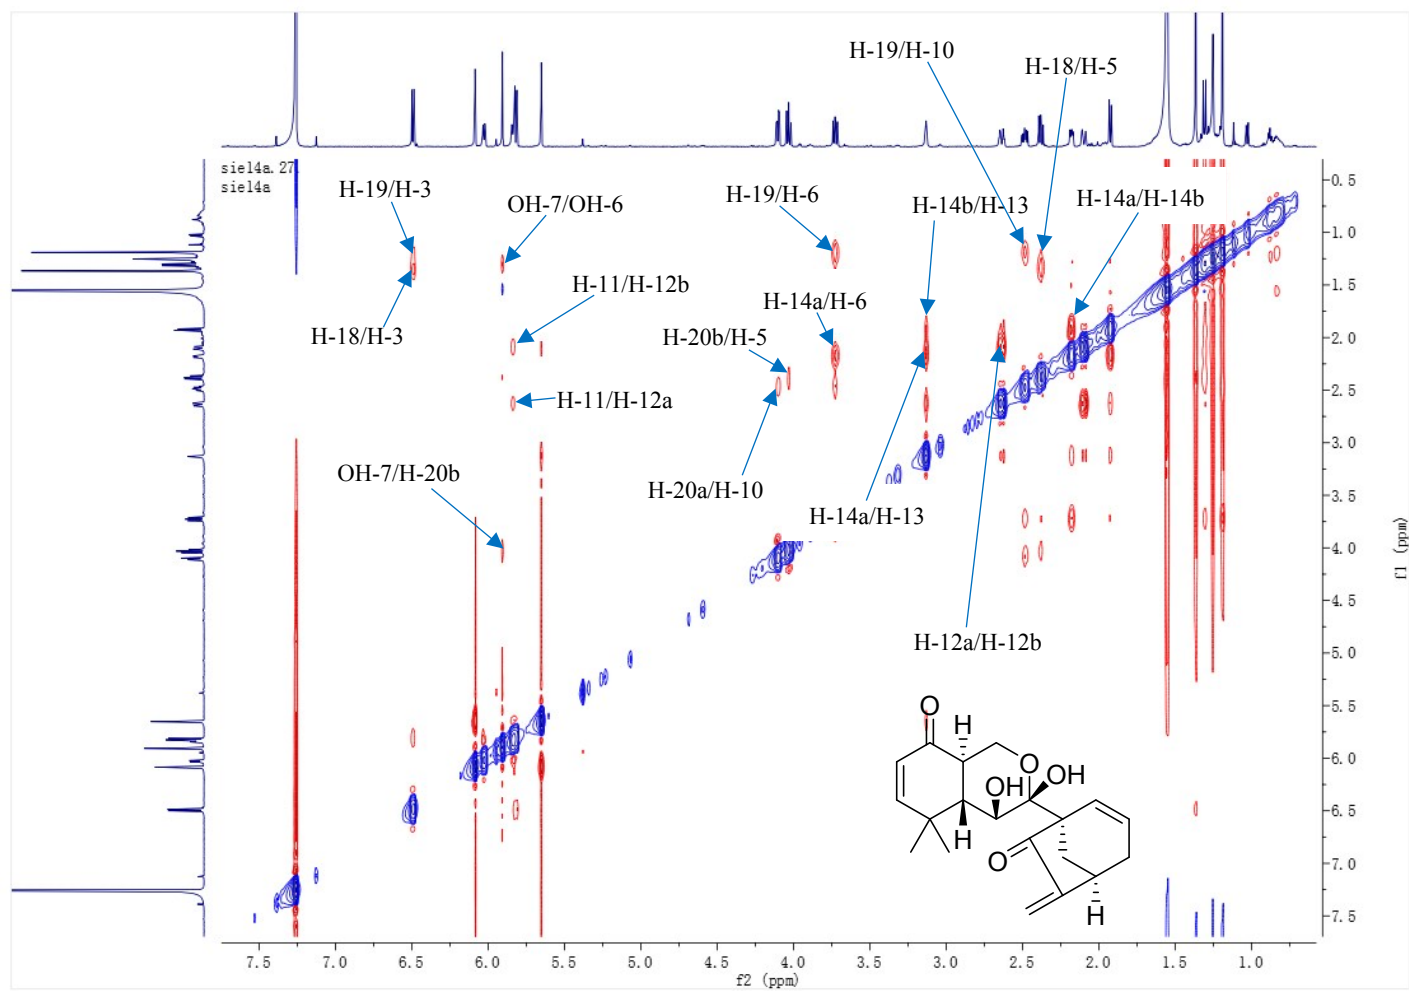

**Figure S54** ROESY spectrum (CDCl<sub>3</sub>, 800MHz) of maericalysin B (2).

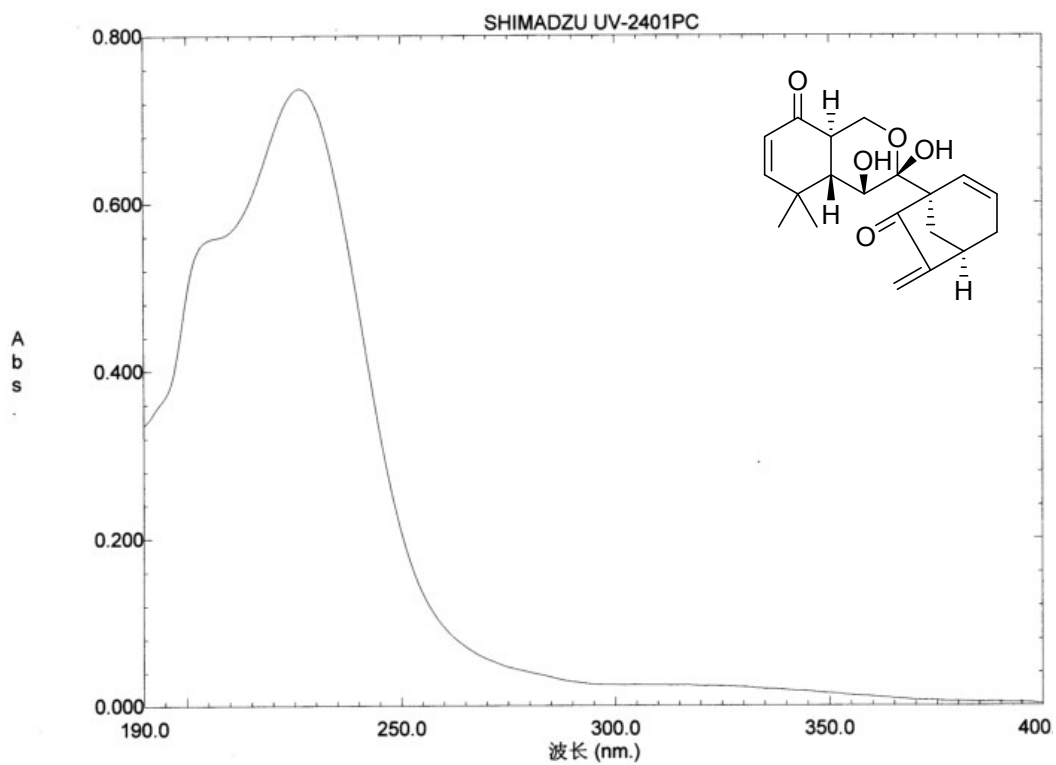

文件名: SIE-14A

SIE-14A ———

创建于: 10:03 17-06-05  
数据: 原始

样品浓度: 0.0286毫克/毫升  
溶剂: 甲醇

测量模式: Abs.  
扫描速度: 中速  
狭缝: 5.0  
采样间隔: 0.5

| 否. | 波长 (nm.) | Abs.   |
|----|----------|--------|
| 1  | 207.00   | 0.5584 |
| 2  | 227.00   | 0.7362 |
| 3  | 314.00   | 0.0241 |

Figure S55 UV spectrum of maericalysin B (2).



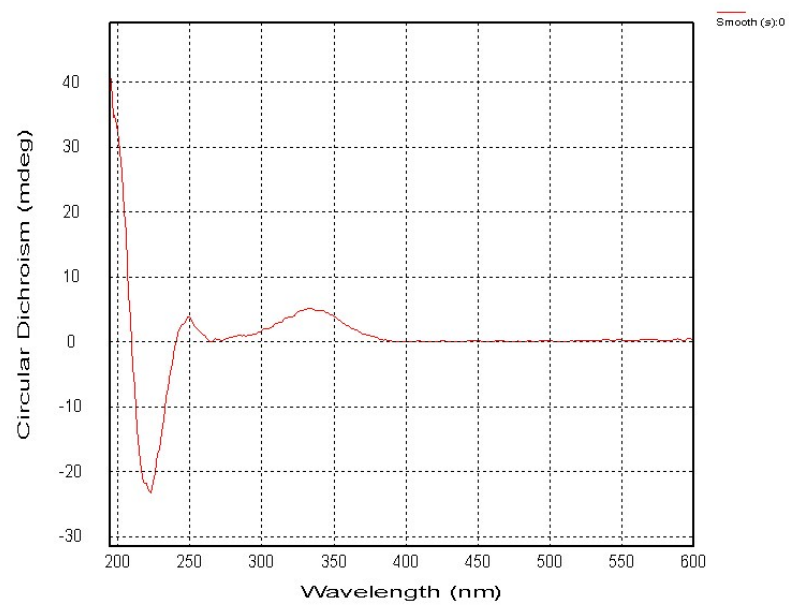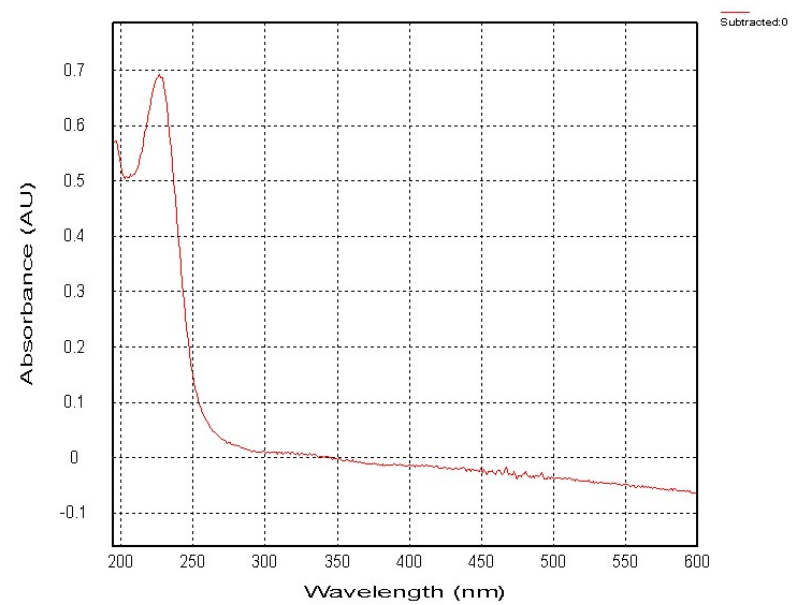

**Figure S56** CD spectrum of maericalysin B (2).

Optical rotation measurement

Model : P-1020 (A060460638)

| No.  | Sample   | Mode   | Data    | Monitor<br>Blank | Temp.<br>Cell<br>Temp Point | Date<br>Comment<br>Sample Name                          | Light<br>Filter<br>Operator | Cycle Time<br>Integ Time |
|------|----------|--------|---------|------------------|-----------------------------|---------------------------------------------------------|-----------------------------|--------------------------|
| No.1 | 16 (1/3) | Sp.Rot | 38.5450 | 0.0212<br>0.0000 | 23.3<br>50.00<br>Cell       | Thu May 25 08:51:19 2017<br>0.00110g/mL MeOH<br>SIE-14A | Na<br>589nm                 | 2 sec<br>2 sec           |
| No.2 | 16 (2/3) | Sp.Rot | 39.8180 | 0.0219<br>0.0000 | 23.3<br>50.00<br>Cell       | Thu May 25 08:51:24 2017<br>0.00110g/mL MeOH<br>SIE-14A | Na<br>589nm                 | 2 sec<br>2 sec           |
| No.3 | 16 (3/3) | Sp.Rot | 41.2730 | 0.0227<br>0.0000 | 23.4<br>50.00<br>Cell       | Thu May 25 08:51:29 2017<br>0.00110g/mL MeOH<br>SIE-14A | Na<br>589nm                 | 2 sec<br>2 sec           |

+39.8180°

Figure S57 OR spectrum of maericalysin B (2).

### 9.3 HRESIMS, NMR, UV, CD and OR spectra of maericalysin C (3)

#### Qualitative Analysis Report

|                               |                             |                      |                      |
|-------------------------------|-----------------------------|----------------------|----------------------|
| <b>Data Filename</b>          | Sie-12-1-3.d                | <b>Sample Name</b>   | Sie-12-1-3           |
| <b>Sample Type</b>            | Sample                      | <b>Position</b>      | P1-A4                |
| <b>Instrument Name</b>        | Instrument 1                | <b>User Name</b>     |                      |
| <b>Acq Method</b>             | s.m                         | <b>Acquired Time</b> | 3/12/2018 4:24:12 PM |
| <b>IRM Calibration Status</b> | OK                          | <b>DA Method</b>     | Default.m            |
| <b>Comment</b>                |                             |                      |                      |
| <b>Sample Group</b>           | <b>Info.</b>                |                      |                      |
| <b>Acquisition SW</b>         | 6200 series TOF/6500 series |                      |                      |
| <b>Version</b>                | Q-TOF B.05.01 (B5125.2)     |                      |                      |

#### User Spectra

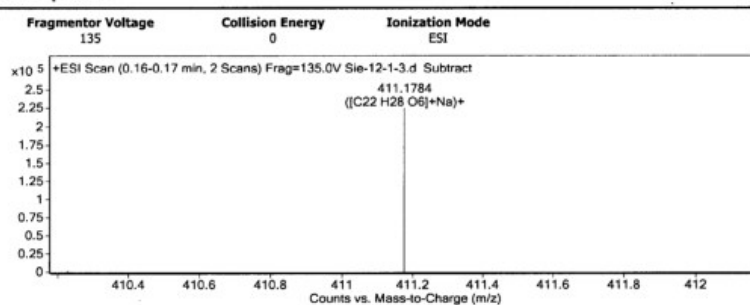

#### Peak List

| m/z      | z | Abund     | Formula    | Ion     |
|----------|---|-----------|------------|---------|
| 112.1873 | 1 | 61725.59  |            |         |
| 290.2689 | 1 | 39637.48  |            |         |
| 411.1784 | 1 | 226087.08 | C22 H28 O6 | (M+Na)+ |
| 412.1816 | 1 | 51856.26  | C22 H28 O6 | (M+Na)+ |
| 413.1928 | 1 | 63103.4   |            |         |
| 427.1521 | 1 | 91125.02  |            |         |
| 429.1661 | 1 | 46415.21  |            |         |
| 799.3671 | 1 | 56641.21  |            |         |

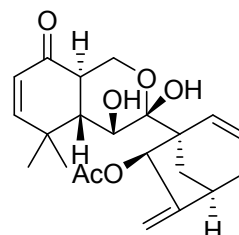

#### Formula Calculator Element Limits

| Element | Min | Max |
|---------|-----|-----|
| C       | 3   | 60  |
| H       | 0   | 120 |
| O       | 0   | 30  |

#### Formula Calculator Results

| Formula    | CalculatedMass | CalculatedMz | Mz       | Diff. (mDa) | Diff. (ppm) | DBE    |
|------------|----------------|--------------|----------|-------------|-------------|--------|
| C22 H28 O6 | 388.1886       | 411.1778     | 411.1784 | -0.5        | -1.4        | 9.0000 |

--- End Of Report ---

Figure S58 HRESIMS spectrum of maericalysin C (3).

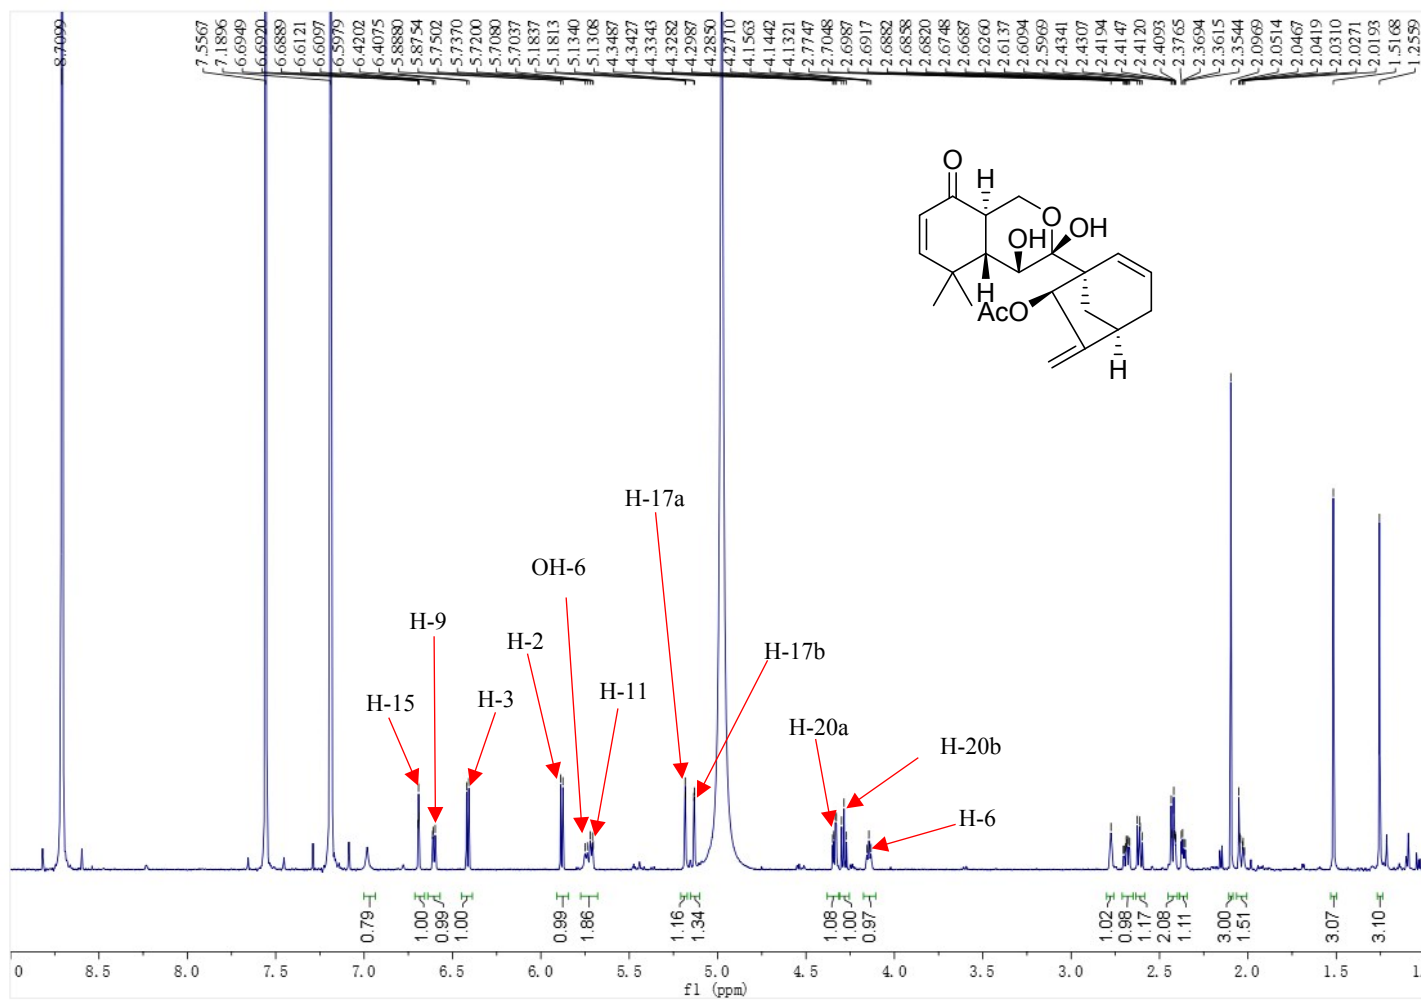

Figure S59  $^1\text{H-NMR}$  spectrum (pyridine- $d_5$ , 800MHz) of maoeriocalysin C (**3**).

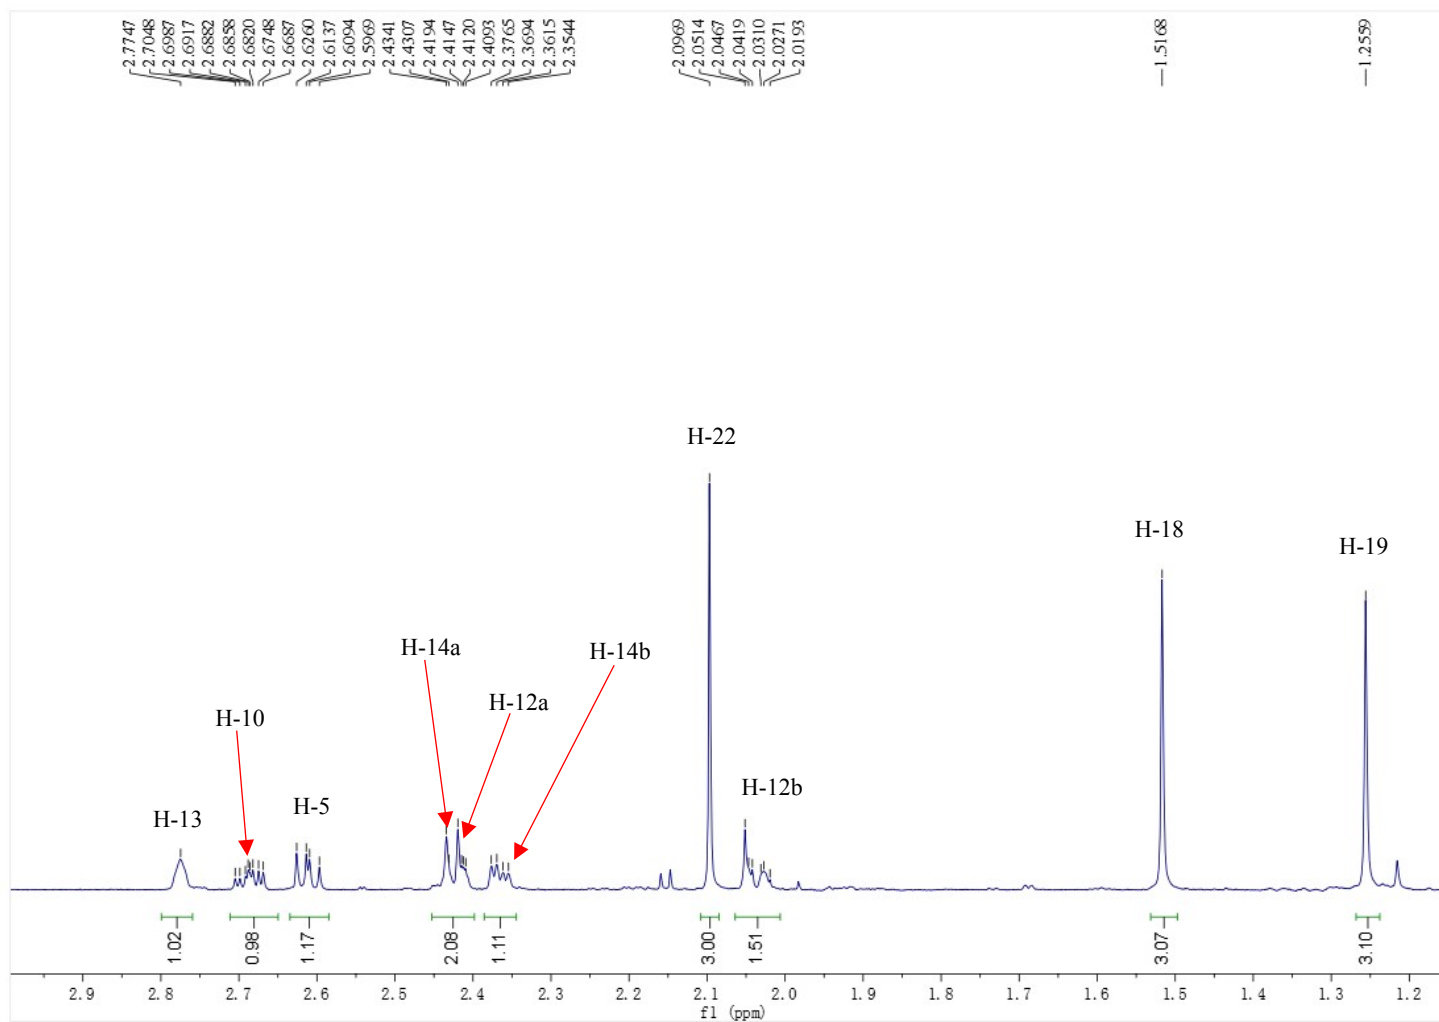

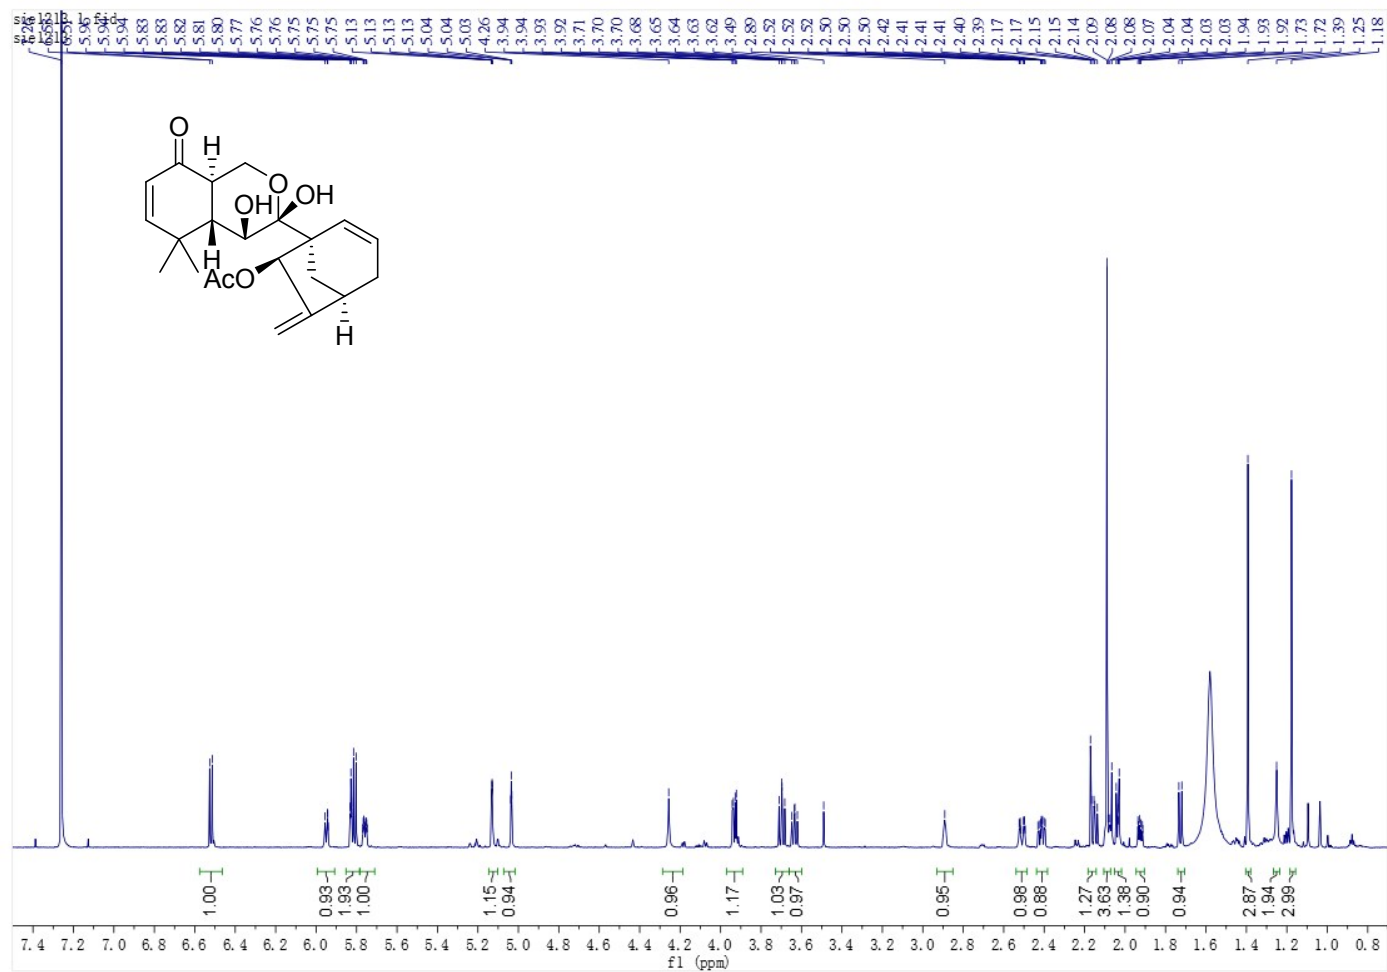

Figure S60 <sup>1</sup>H-NMR spectrum (CDCl<sub>3</sub>, 800MHz) of maoerialysin C (3).

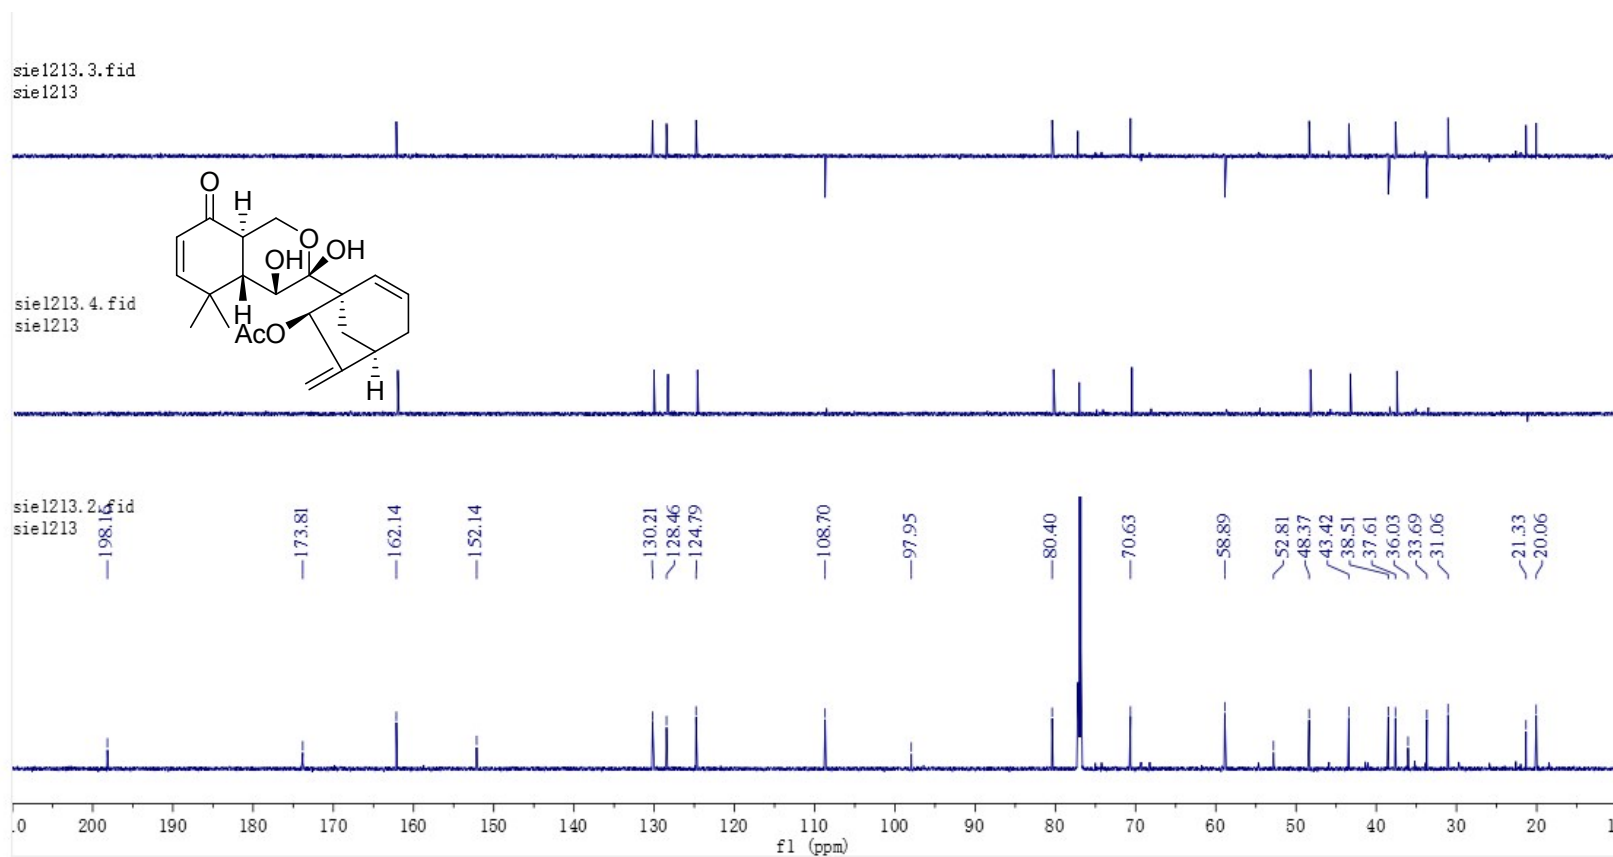

**Figure S61**  $^{13}\text{C}$  NMR spectrum ( $\text{CDCl}_3$ , 800MHz) of maericalysin C (**3**).

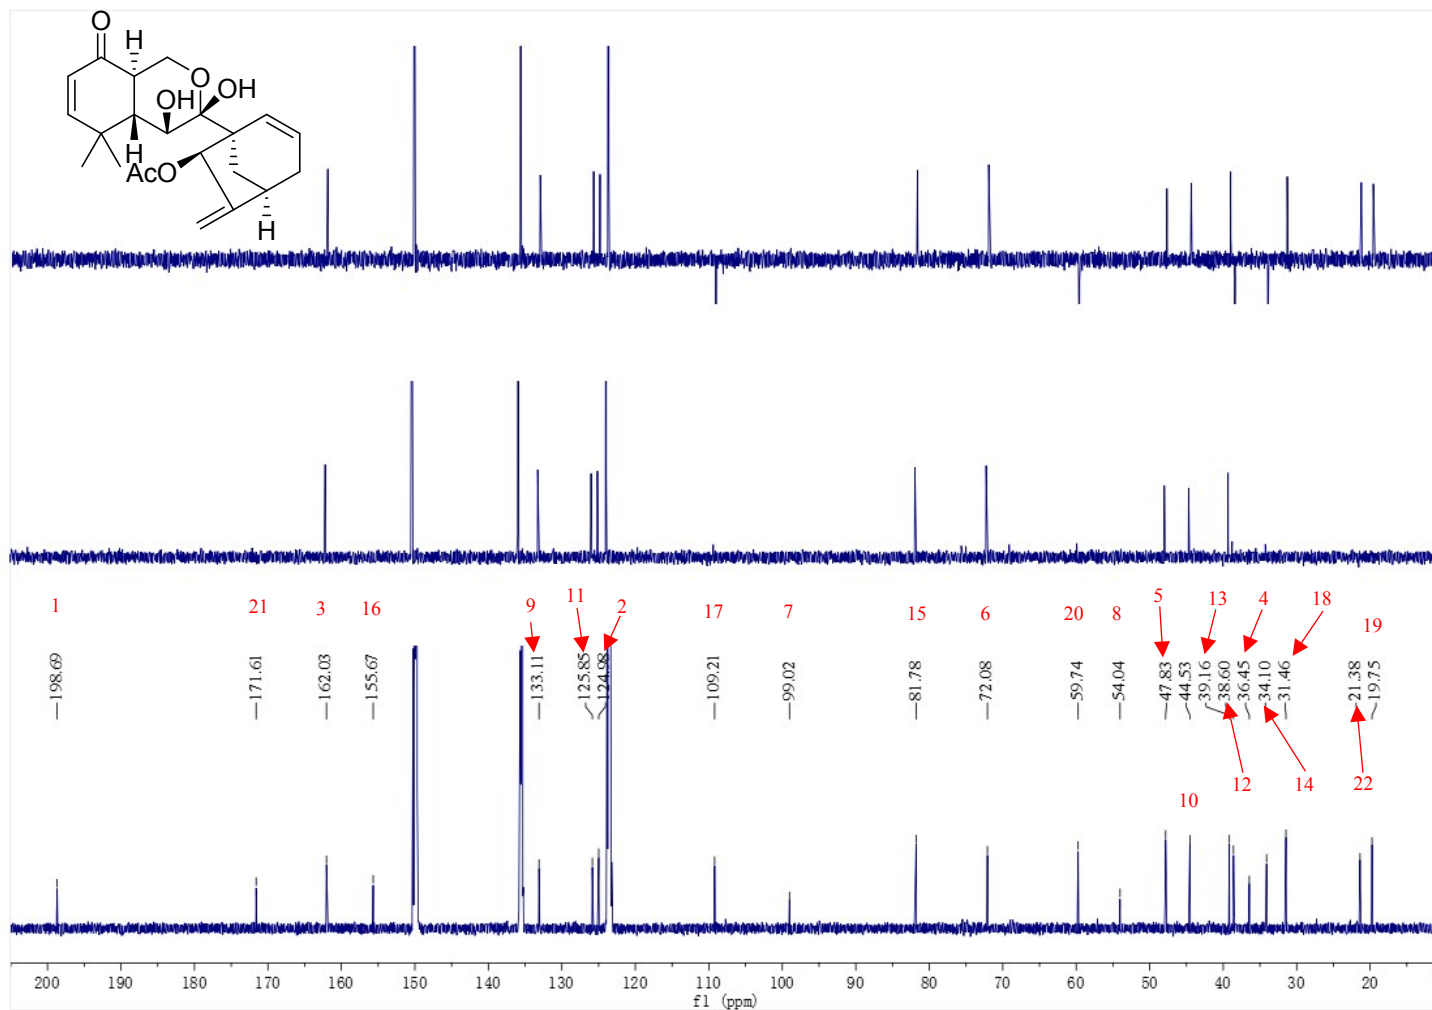

Figure S62  $^{13}\text{C}$  NMR spectrum (pyridine- $d_5$ , 800MHz) of maericalysin C (3).



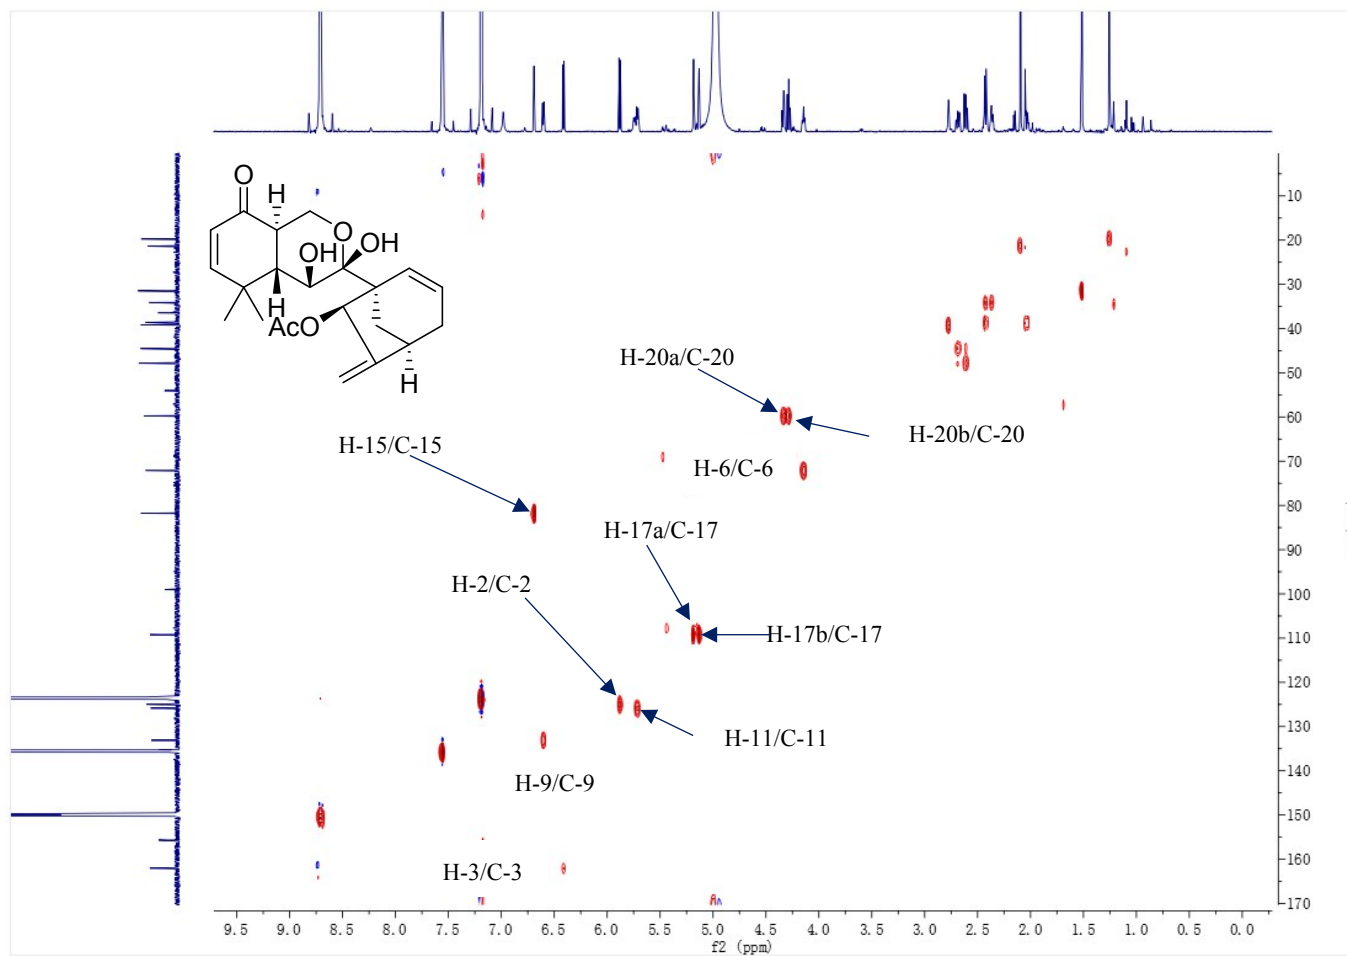

**Figure S63** HSQC spectrum (pyridine-*d*<sub>5</sub>, 800MHz) of maericalysin C (**3**).

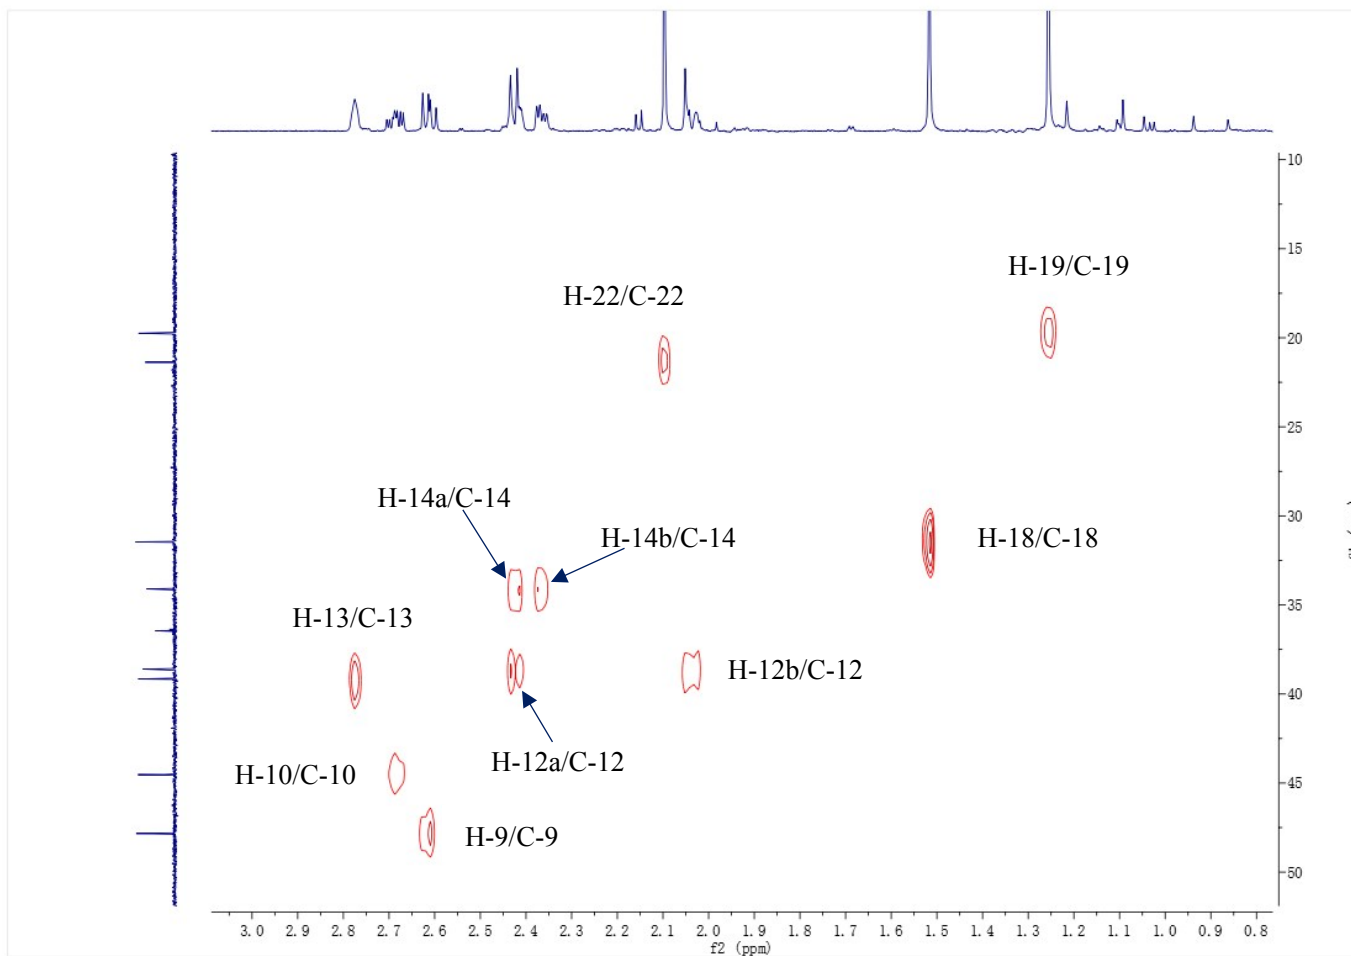

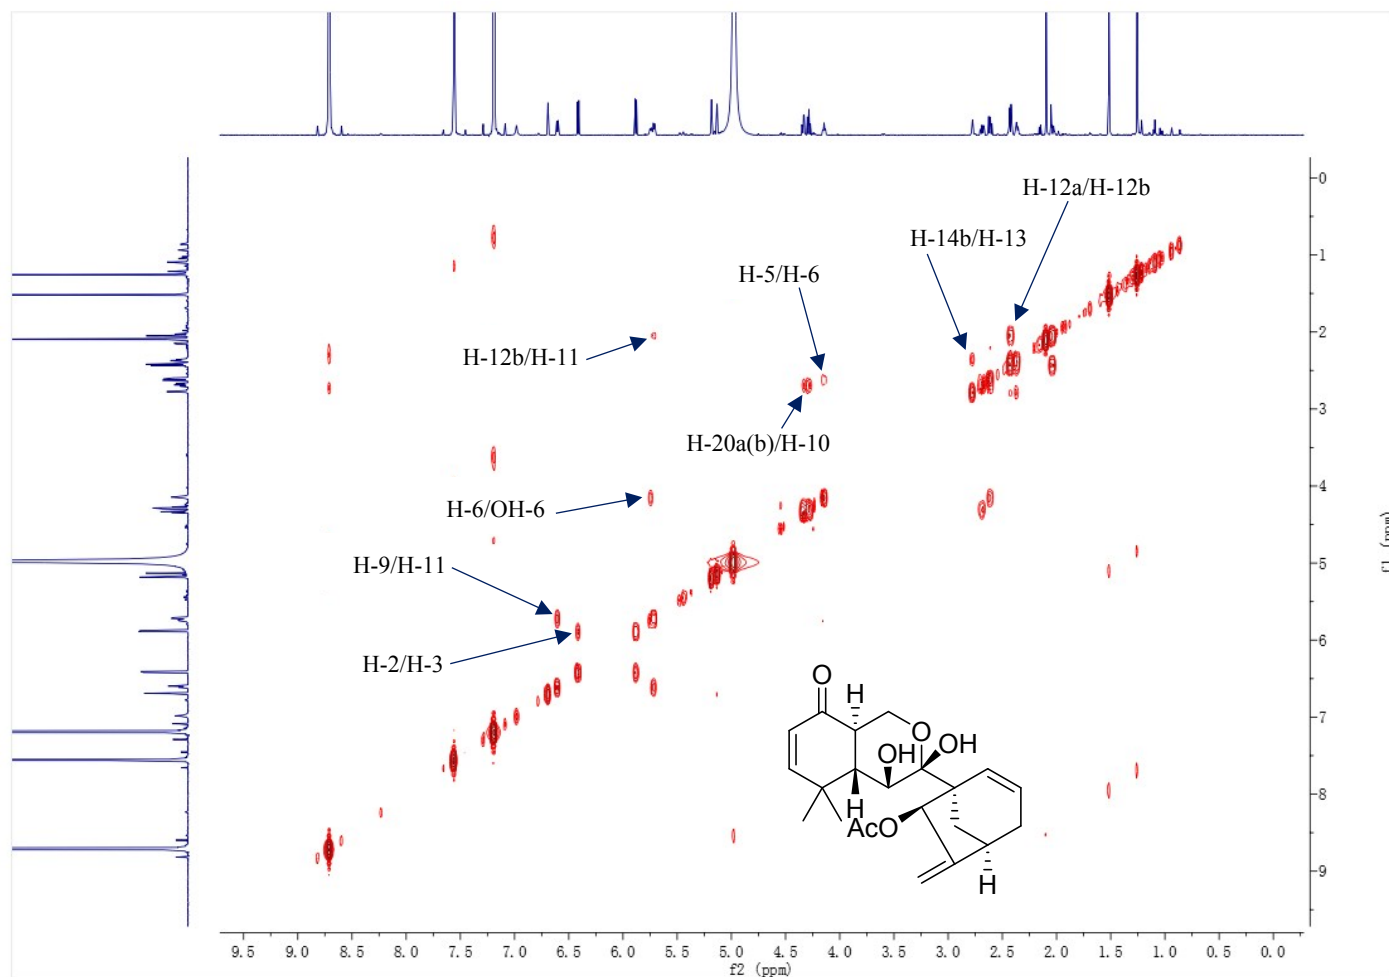

**Figure S64**  $^1\text{H}$ - $^1\text{H}$  COSY spectrum ( $\text{pyridine-}d_5$ , 800MHz) of maoericalysin C (**3**).

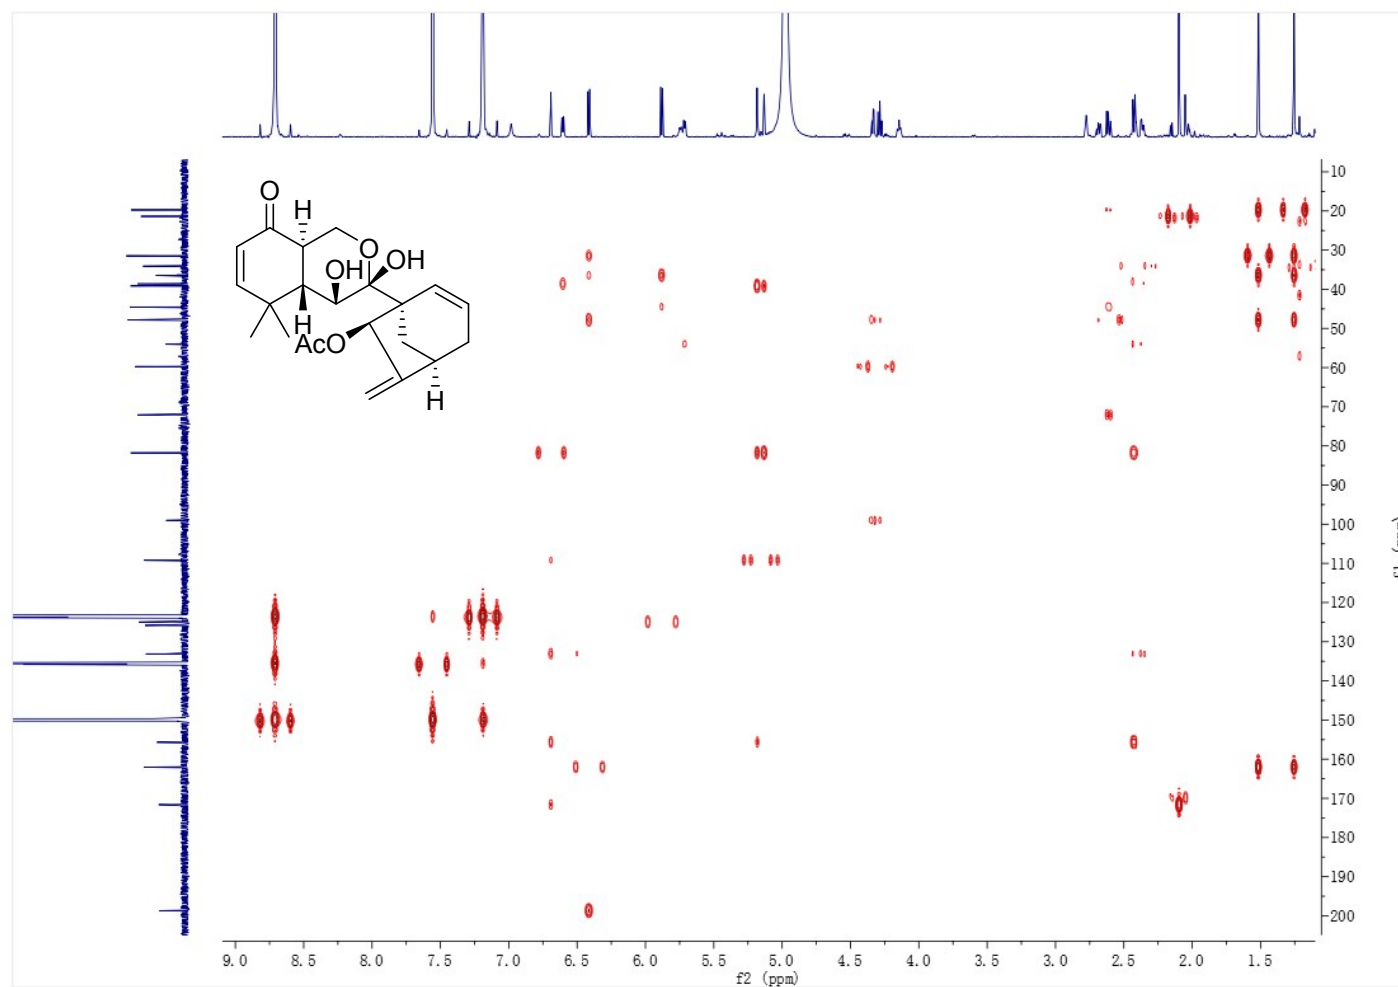

**Figure S65** HMBC spectrum (pyridine-*d*<sub>5</sub>, 800MHz) of maoericalysin C (**3**).

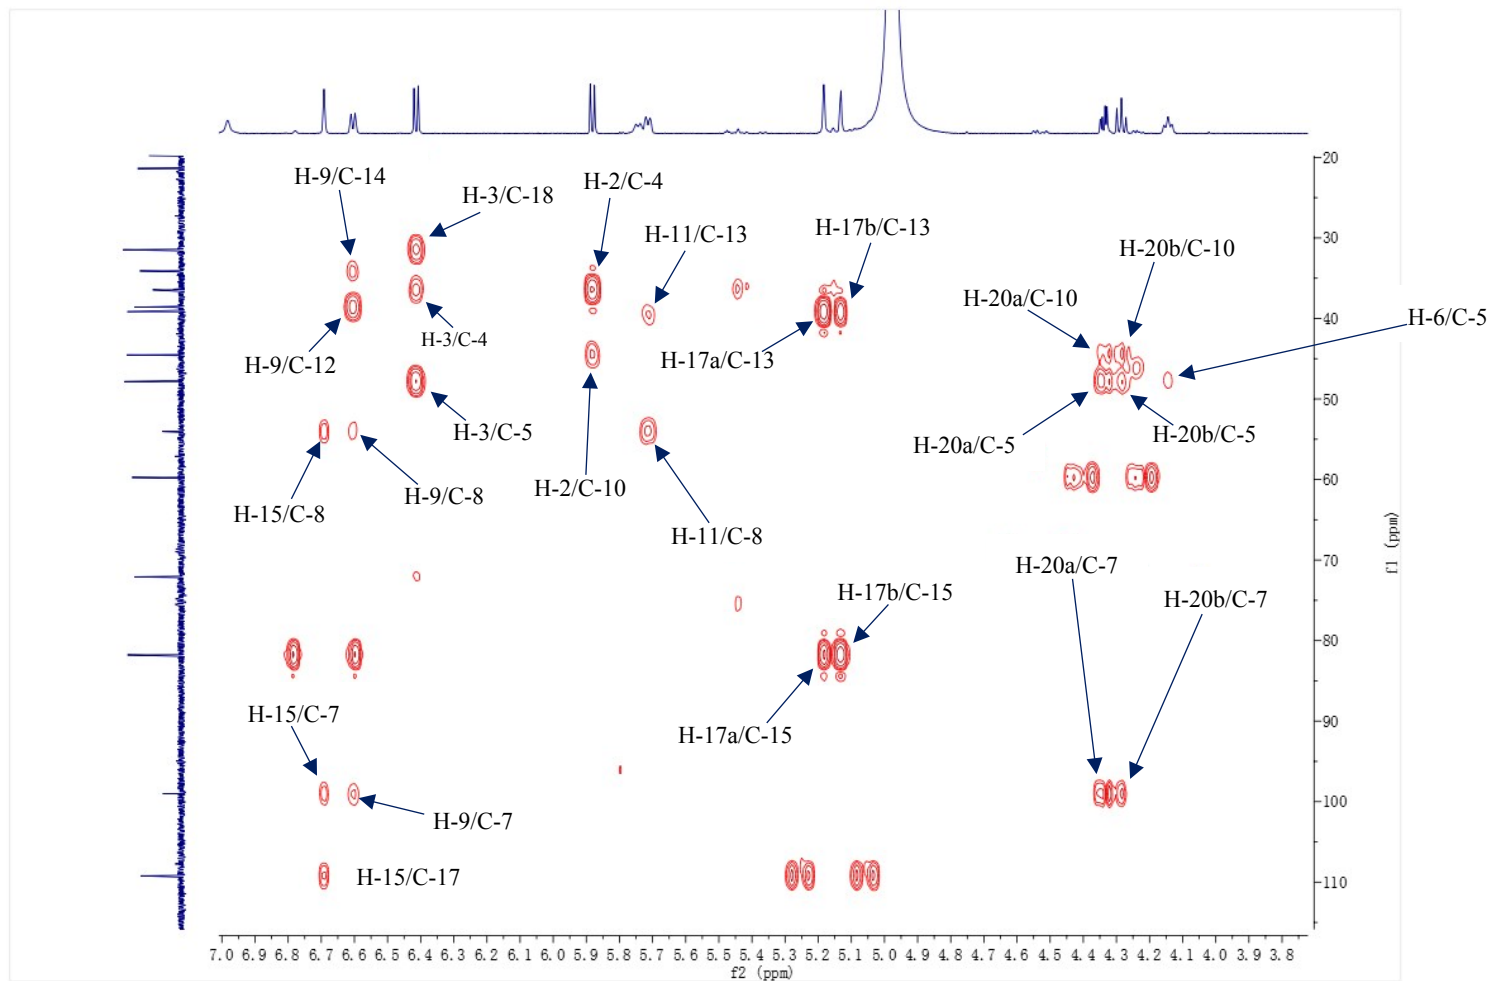

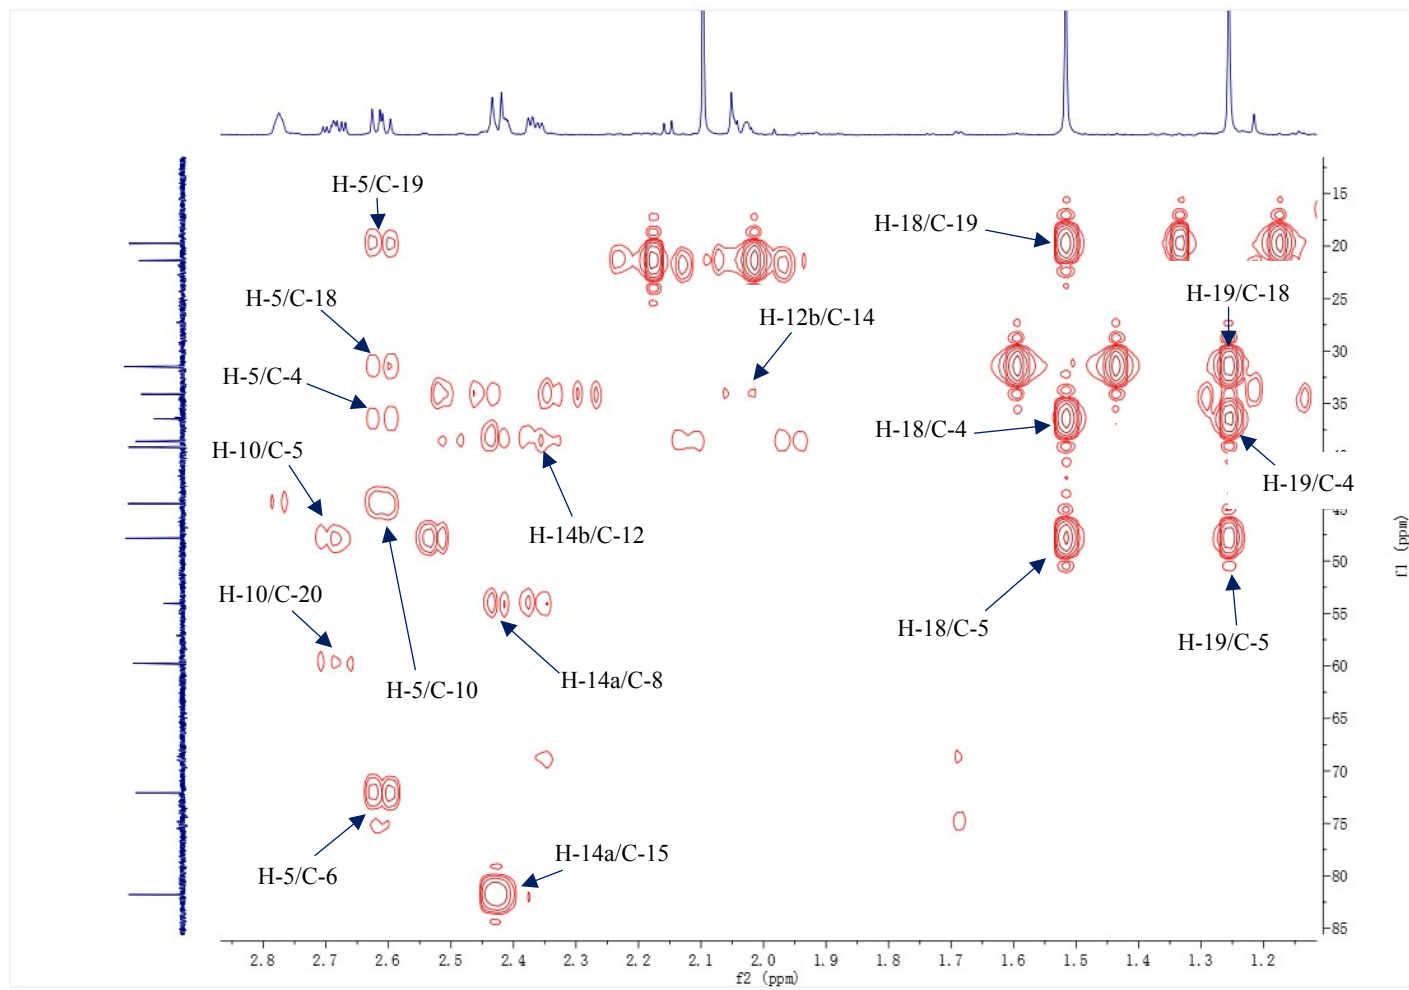

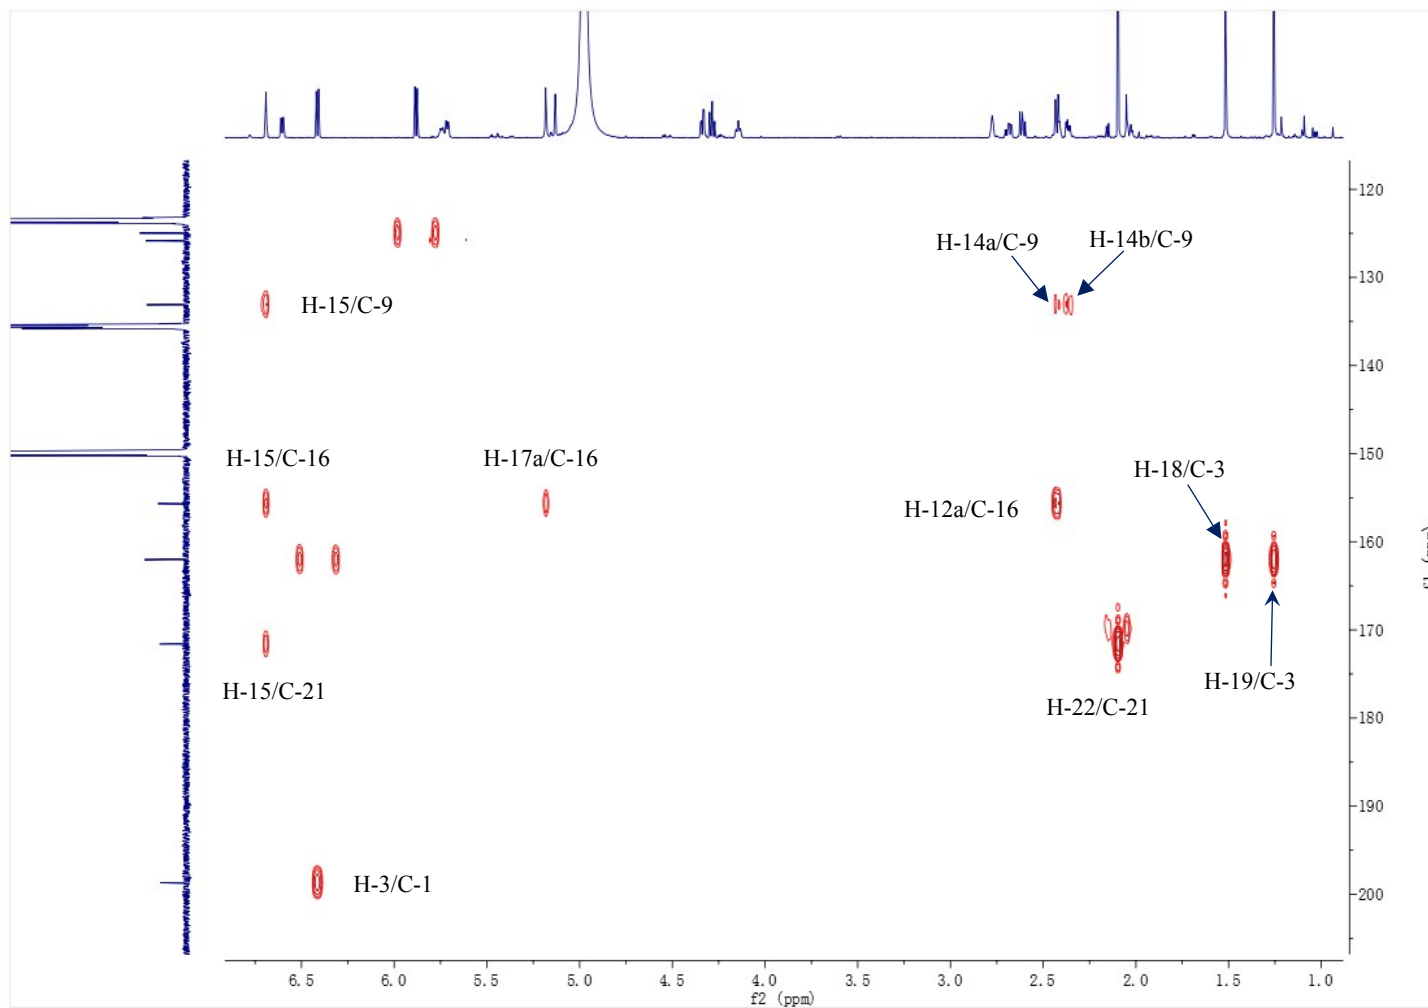

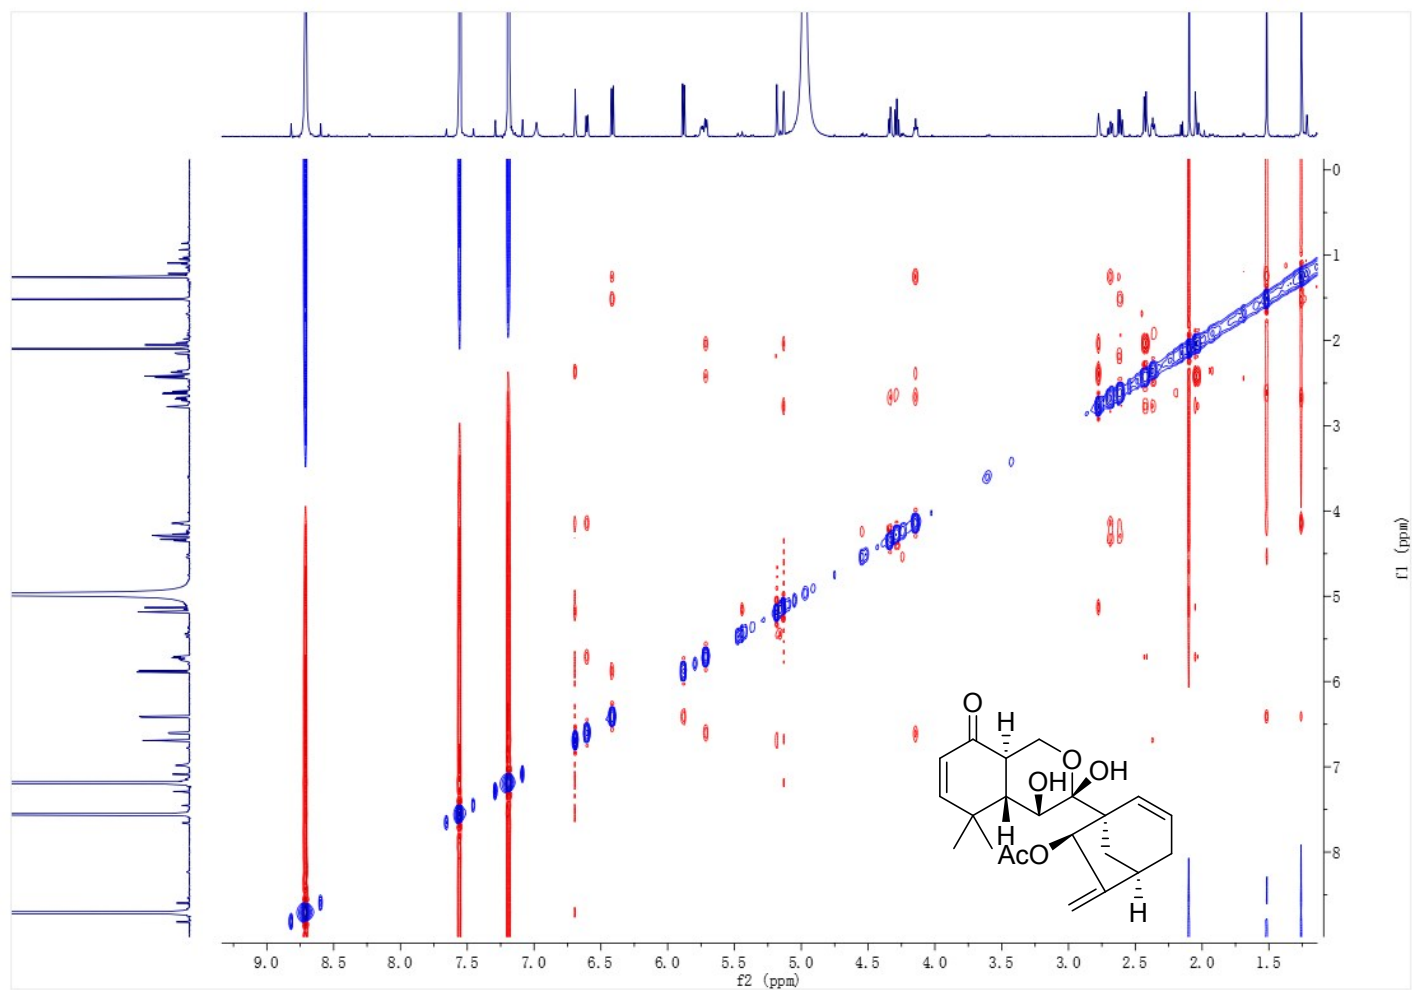

**Figure S66** ROESY spectrum (pyridine-*d*<sub>5</sub>, 800MHz) of maericalysin C (**3**).



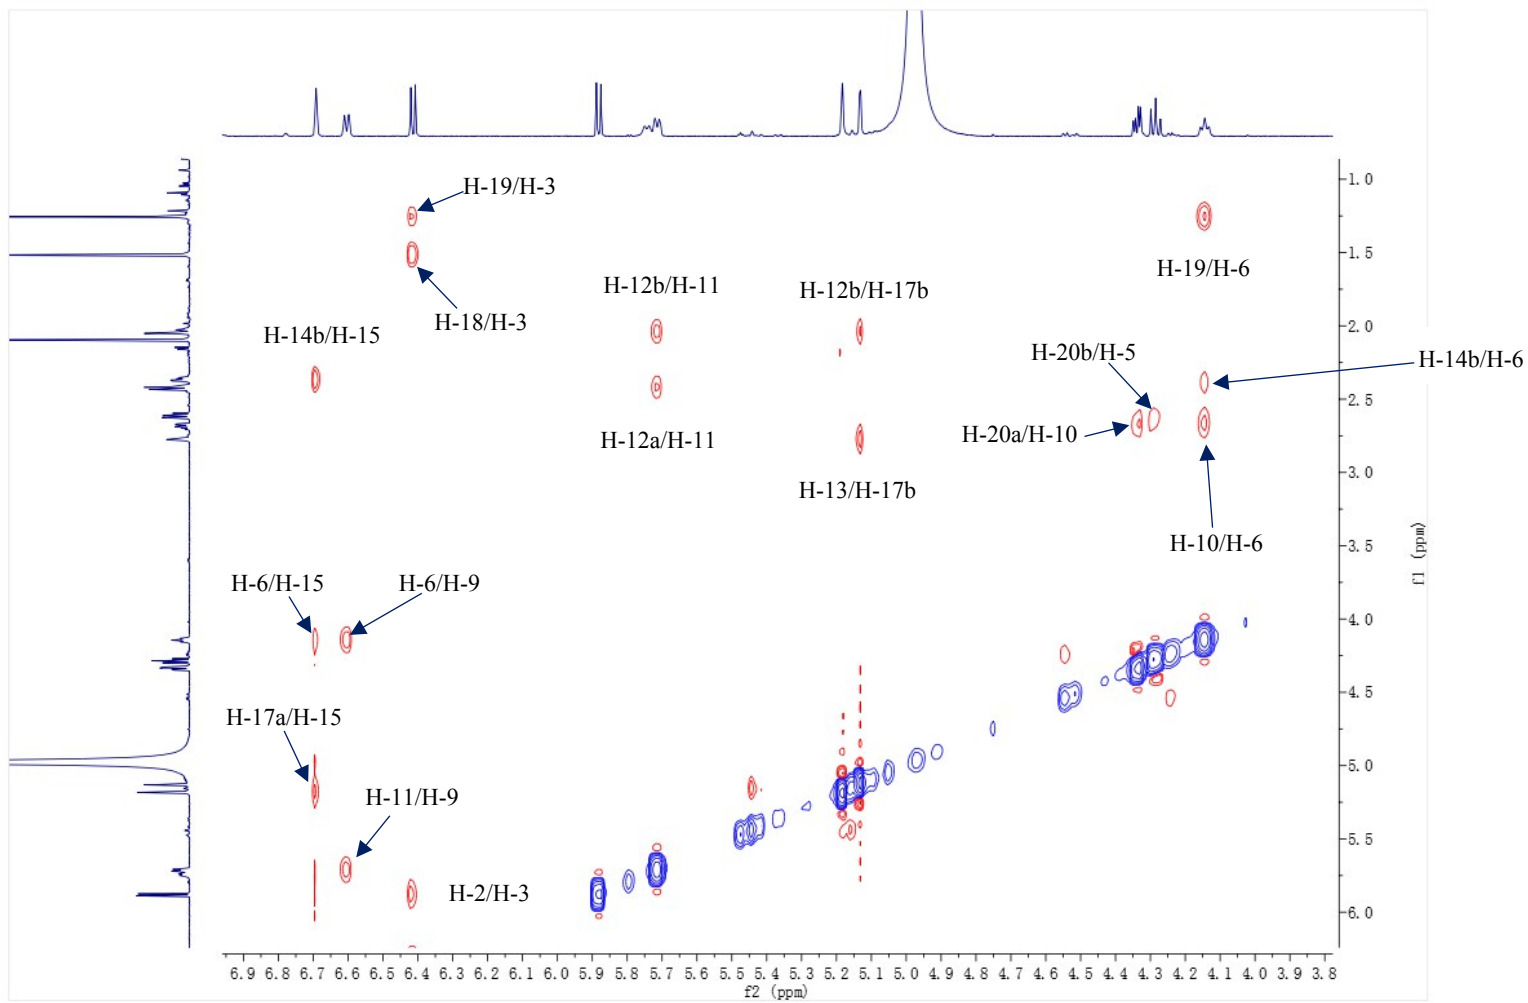

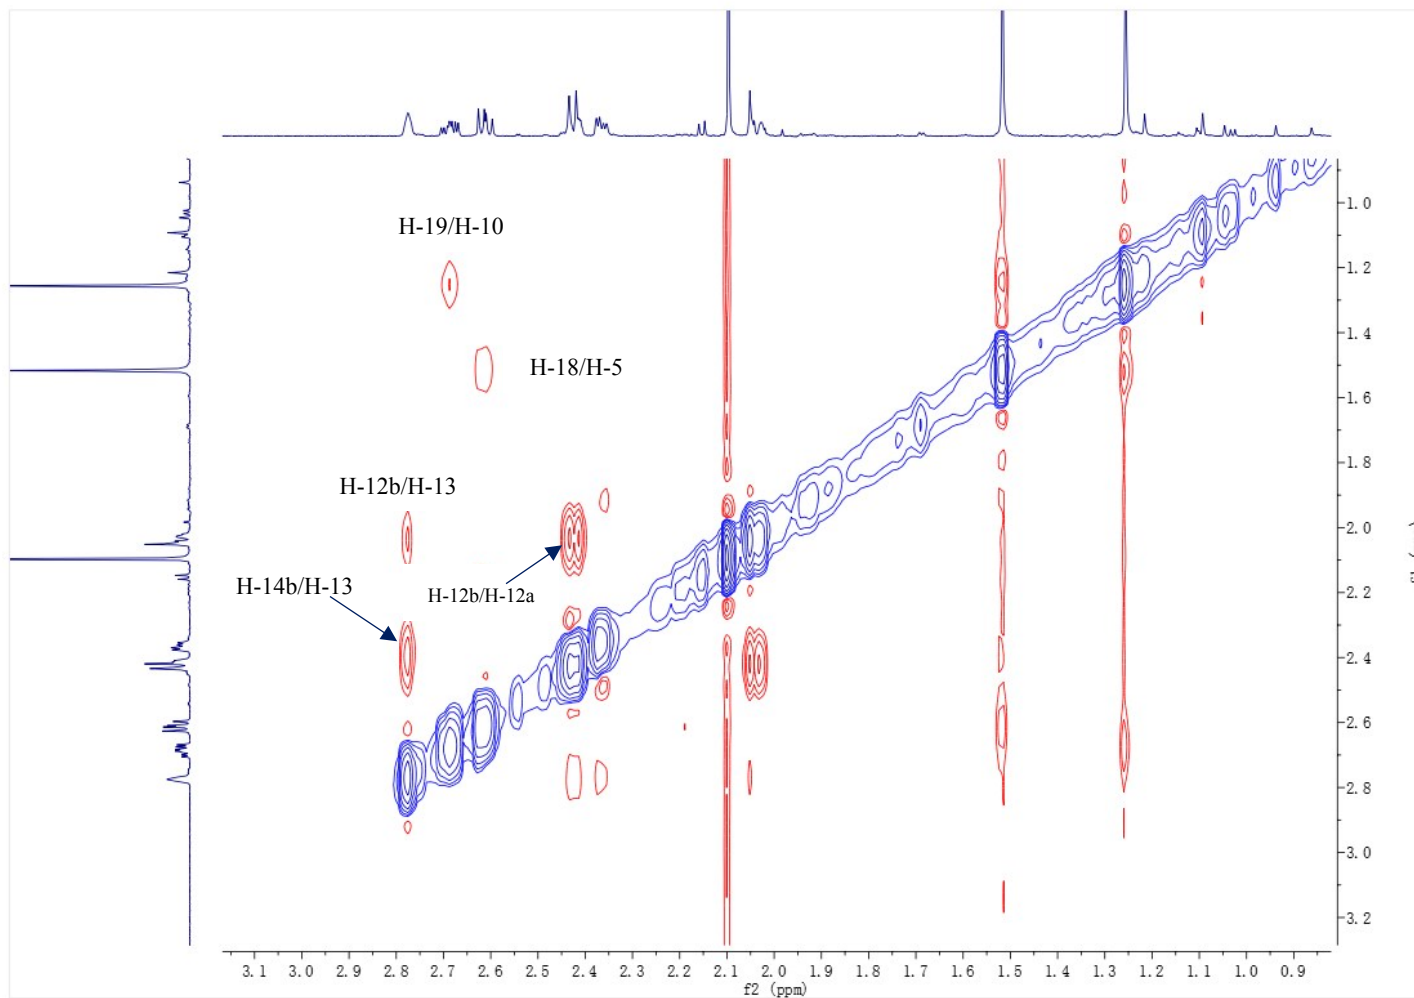

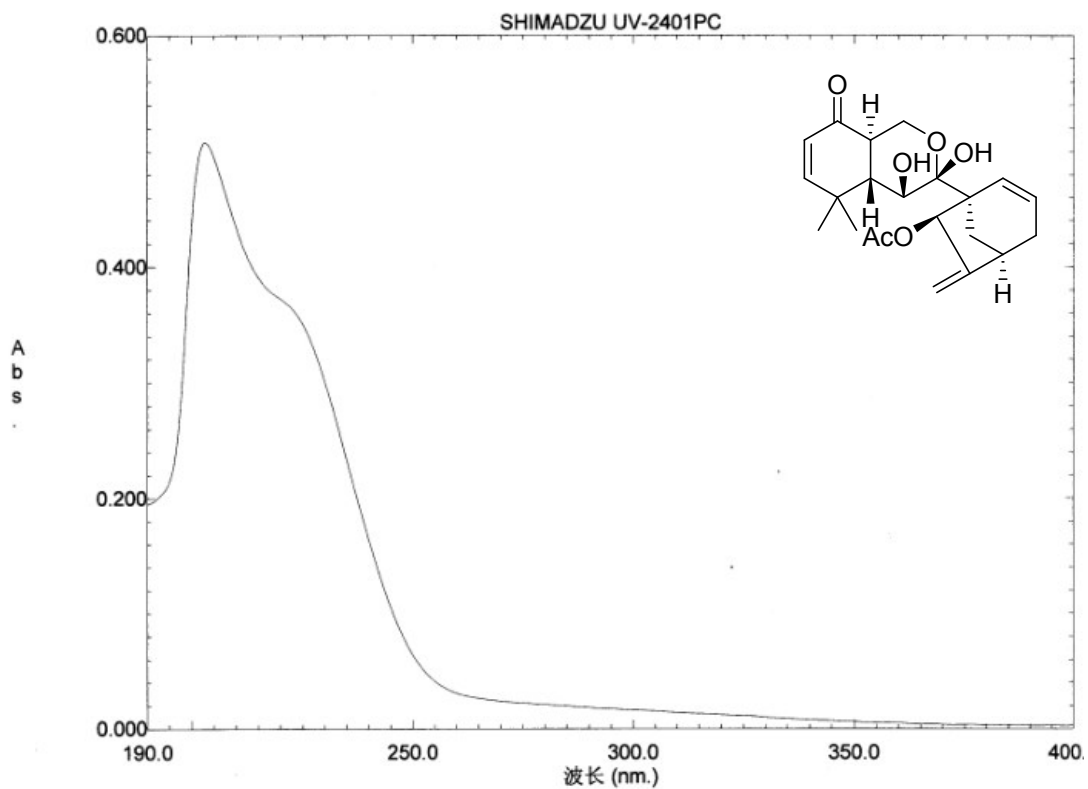

文件名: 17081100  
 样品名称: SIE-12-1-3

17081100

创建于: 09:52 17-08-11  
 数据: 原始

样品浓度: 0.0306毫克/毫升  
 溶剂: 甲醇

测量模式: Abs.  
 扫描速度: 中速  
 狭缝: 5.0  
 采样间隔: 0.2

| 否. | 波长 (nm.) | Abs.   |
|----|----------|--------|
| 1  | 202.80   | 0.5073 |
| 2  | 217.60   | 0.3788 |

**Figure S67** UV spectrum of maericalysin C (3).

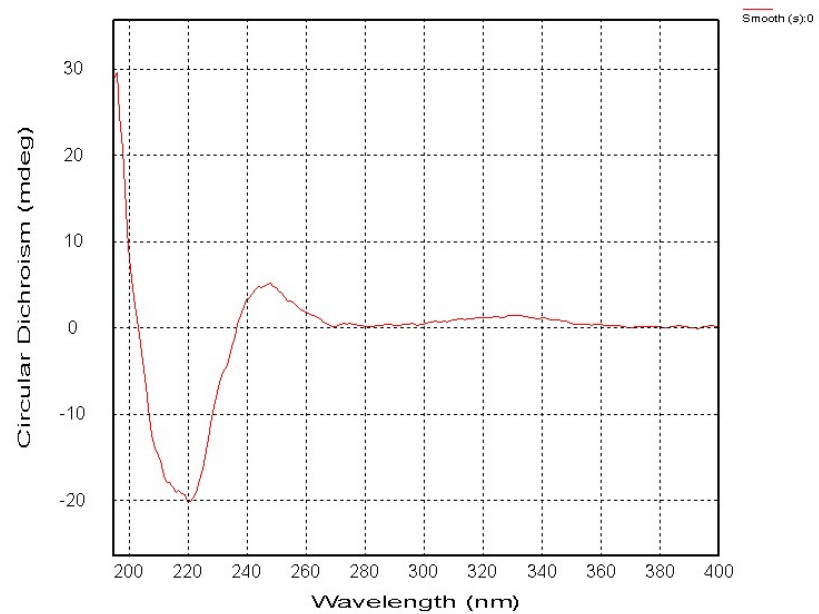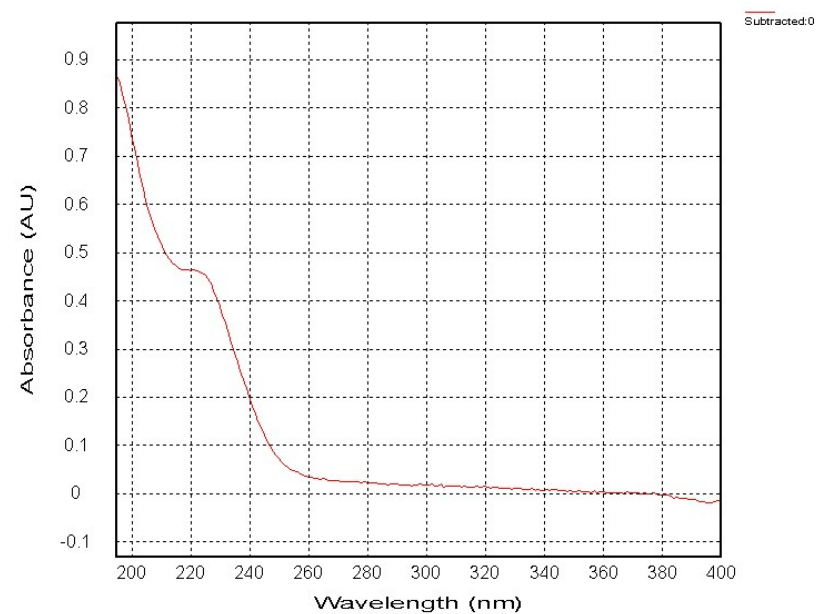

**Figure S68** CD spectrum of maericalysin C (**3**).

Optical rotation measurement

Model : P-1020 (A060460638)

| No.  | Sample  | Mode   | Data     | Monitor Blank     | Temp. Cell Temp Point | Date Comment Sample Name                                   | Light Filter Operator | Cycle Time Integ Time |
|------|---------|--------|----------|-------------------|-----------------------|------------------------------------------------------------|-----------------------|-----------------------|
| No.1 | 9 (1/3) | Sp.Rot | -22.3530 | -0.0038<br>0.0000 | 23.9<br>10.00         | Fri Jul 21 00:50:46 2017<br>0.00170g/mL MeOH<br>SIE-12-1-3 | Na<br>589nm           | 2 sec<br>2 sec        |
| No.2 | 9 (2/3) | Sp.Rot | -22.9410 | -0.0039<br>0.0000 | 23.9<br>10.00         | Fri Jul 21 00:50:51 2017<br>0.00170g/mL MeOH<br>SIE-12-1-3 | Na<br>589nm           | 2 sec<br>2 sec        |
| No.3 | 9 (3/3) | Sp.Rot | -24.1180 | -0.0041<br>0.0000 | 24.0<br>10.00         | Fri Jul 21 00:50:56 2017<br>0.00170g/mL MeOH<br>SIE-12-1-3 | Na<br>589nm           | 2 sec<br>2 sec        |

- 22.3530, 22.9410, 24.1180

Figure S69 OR spectrum of maericalysin C (3).

## 9.4 HRESIMS, NMR, UV, CD and OR spectra of maericalysin D (4)

### Qualitative Analysis Report

|                               |                             |                      |                      |
|-------------------------------|-----------------------------|----------------------|----------------------|
| <b>Data Filename</b>          | Sie-21-1.d                  | <b>Sample Name</b>   | Sie-21-1             |
| <b>Sample Type</b>            | Sample                      | <b>Position</b>      | P1-A3                |
| <b>Instrument Name</b>        | Instrument 1                | <b>User Name</b>     |                      |
| <b>Acq Method</b>             | s.m                         | <b>Acquired Time</b> | 3/12/2018 4:23:00 PM |
| <b>IRM Calibration Status</b> | Substrate                   | <b>DA Method</b>     | Default.m            |
| <b>Comment</b>                |                             |                      |                      |
| <b>Sample Group</b>           |                             | <b>Info.</b>         |                      |
| <b>Acquisition SW</b>         | 6200 series TOF/6500 series |                      |                      |
| <b>Version</b>                | Q-TOF B.05.01 (B5125.2)     |                      |                      |

#### User Spectra

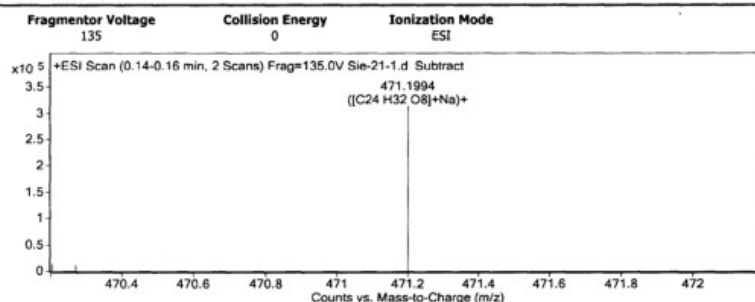

#### Peak List

| m/z      | z | Abund     | Formula                                        | Ion                 |
|----------|---|-----------|------------------------------------------------|---------------------|
| 431.2296 | 1 | 45297.22  |                                                |                     |
| 453.2227 | 1 | 52445.54  |                                                |                     |
| 459.1815 | 1 | 46103.06  |                                                |                     |
| 471.1994 | 1 | 314629.63 | C <sub>24</sub> H <sub>32</sub> O <sub>8</sub> | (M+Na) <sup>+</sup> |
| 472.2025 | 1 | 77677.32  | C <sub>24</sub> H <sub>32</sub> O <sub>8</sub> | (M+Na) <sup>+</sup> |
| 475.2287 | 1 | 52225.03  |                                                |                     |
| 487.1736 | 1 | 111297.13 |                                                |                     |
| 919.4088 | 1 | 77509.3   |                                                |                     |

#### Formula Calculator Element Limits

| Element | Min | Max |
|---------|-----|-----|
| C       | 3   | 60  |
| H       | 0   | 120 |
| O       | 0   | 30  |

#### Formula Calculator Results

| Formula                                        | CalculatedMass | CalculatedMz | Mz       | Diff. (mDa) | Diff. (ppm) | DBE    |
|------------------------------------------------|----------------|--------------|----------|-------------|-------------|--------|
| C <sub>24</sub> H <sub>32</sub> O <sub>8</sub> | 448.2097       | 471.1989     | 471.1994 | -0.5        | -1.2        | 9.0000 |

--- End Of Report ---

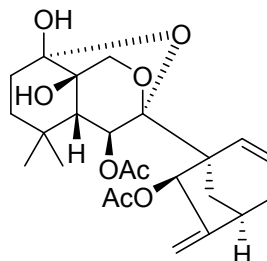

Figure S70 HRESIMS spectrum of maericalysin D (4).

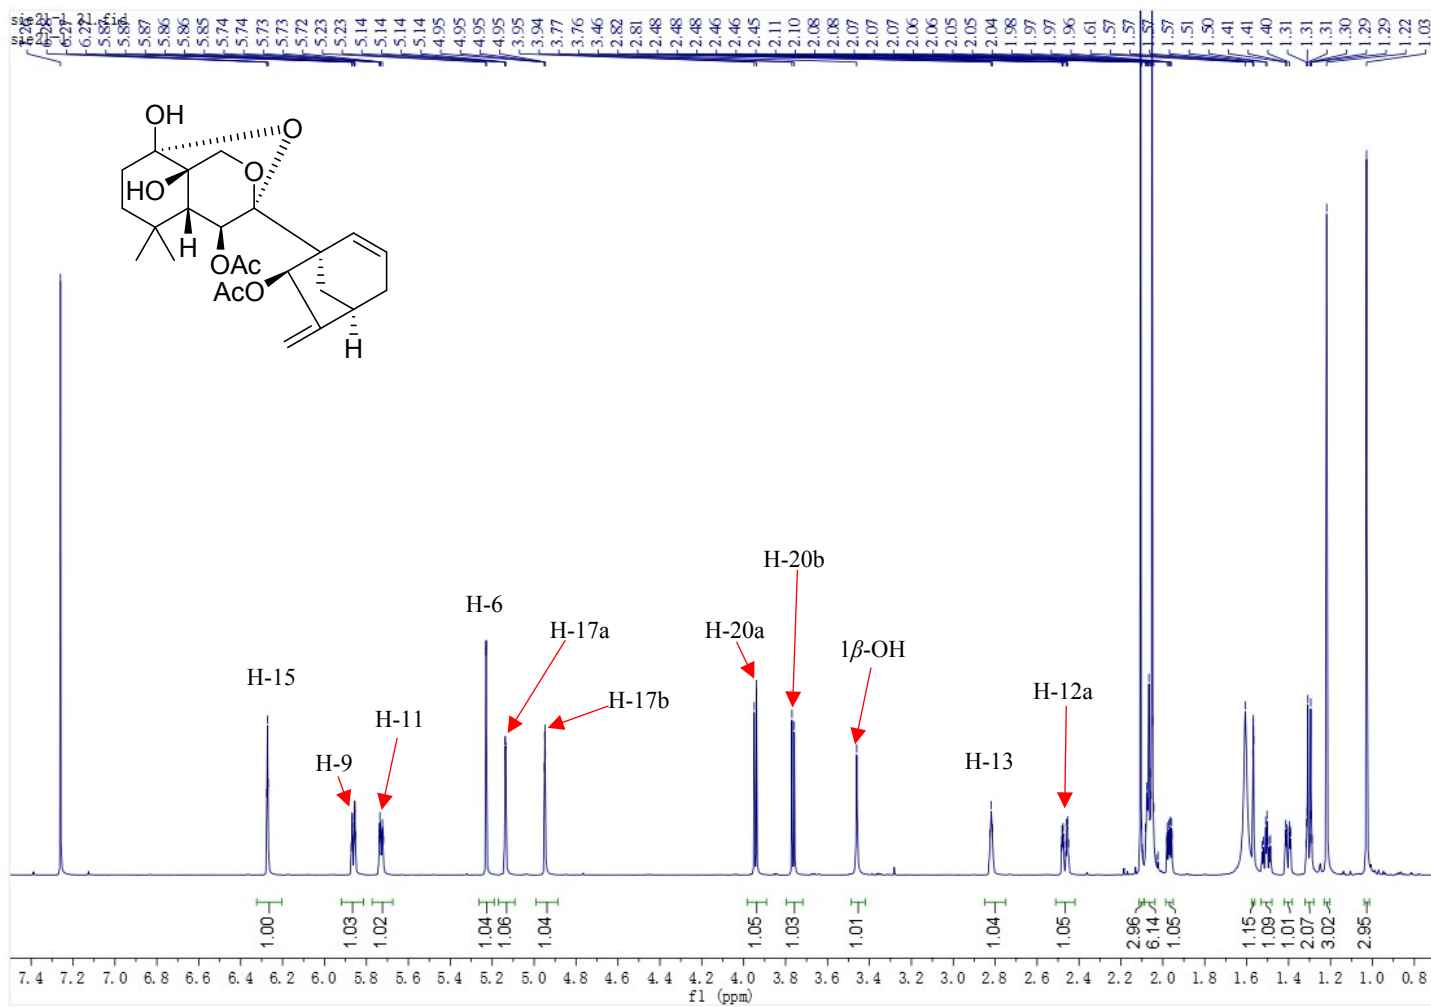

Figure S71 <sup>1</sup>H NMR spectrum (CDCl<sub>3</sub>, 800MHz) of maericalysin D (4).

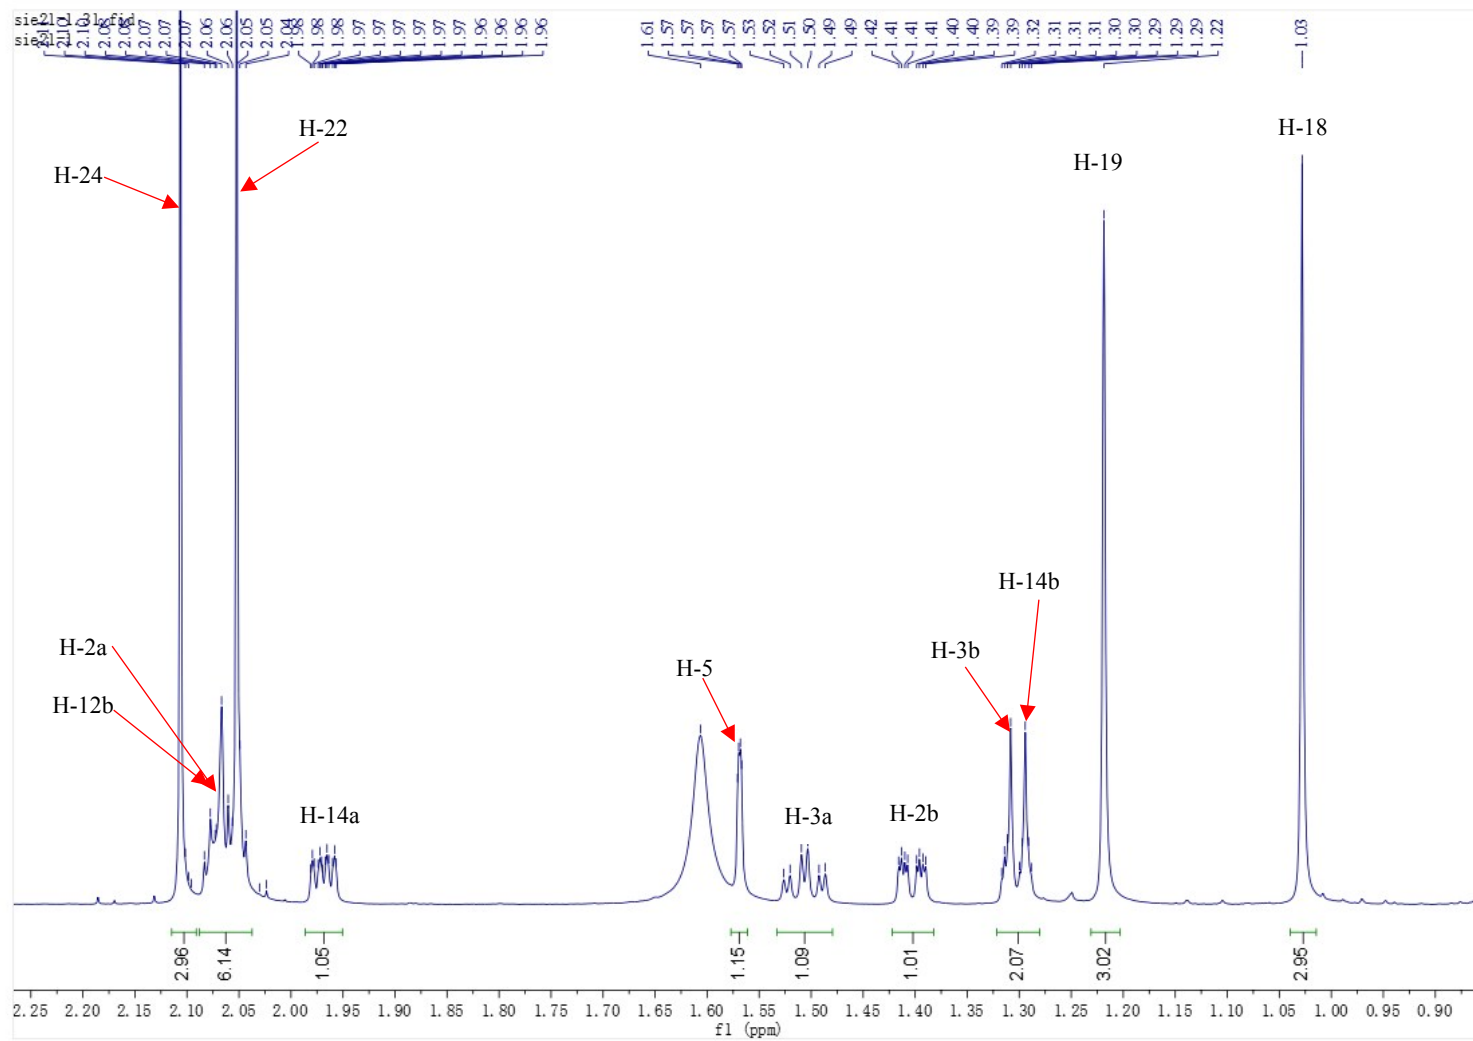





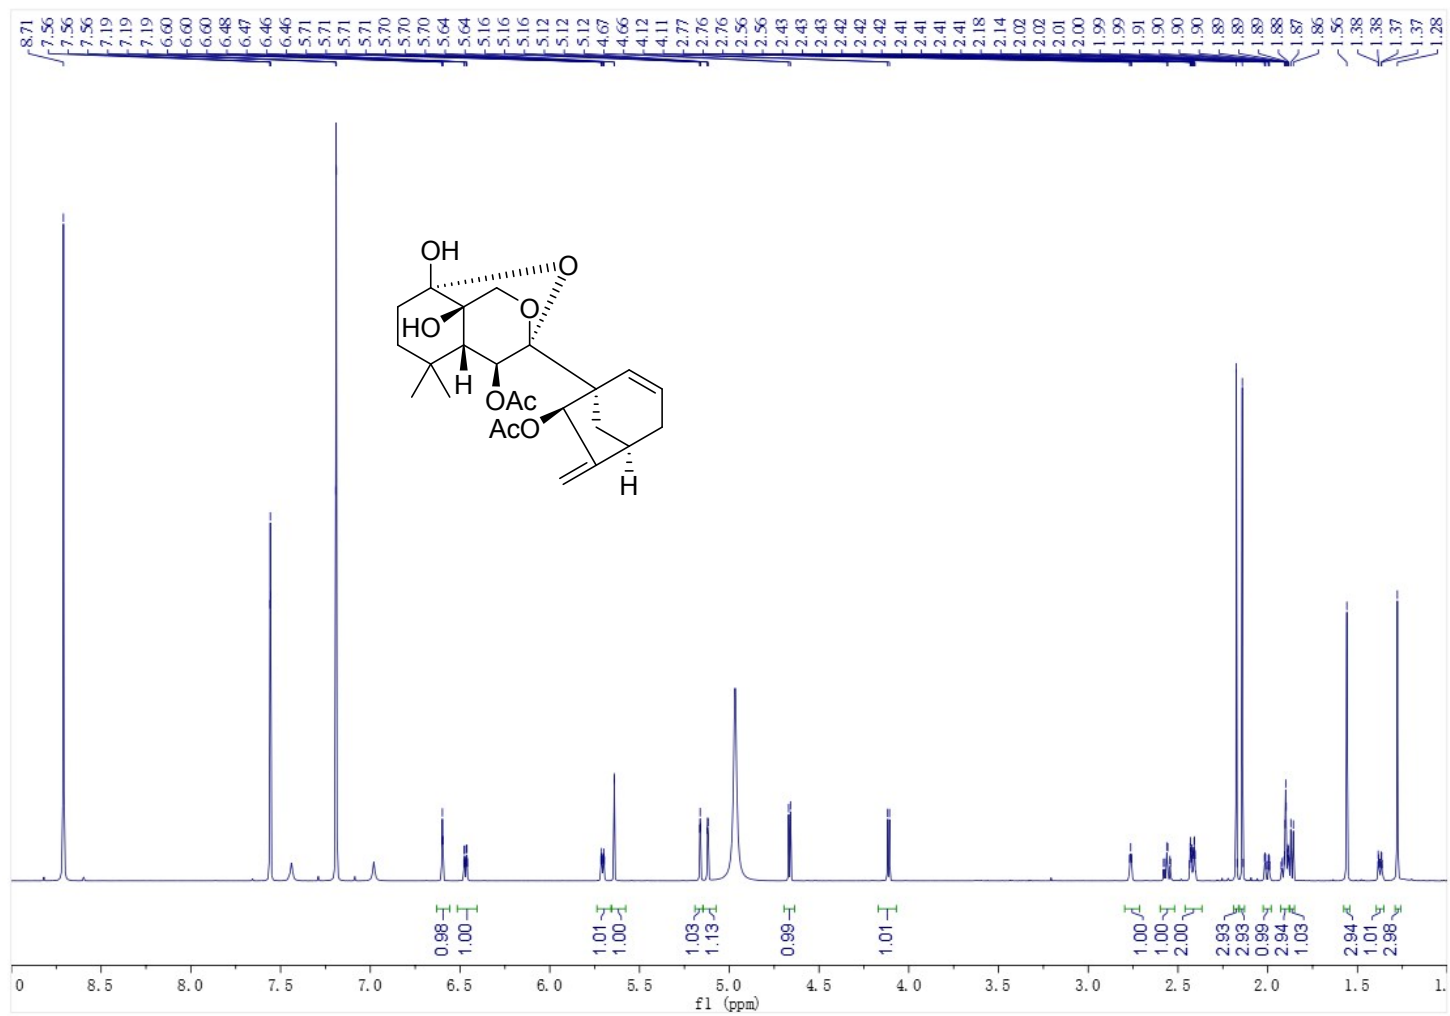

**Figure S73** <sup>1</sup>H NMR spectrum (pyridine-d<sub>5</sub>, 800MHz) of maoericalysin D (**4**).

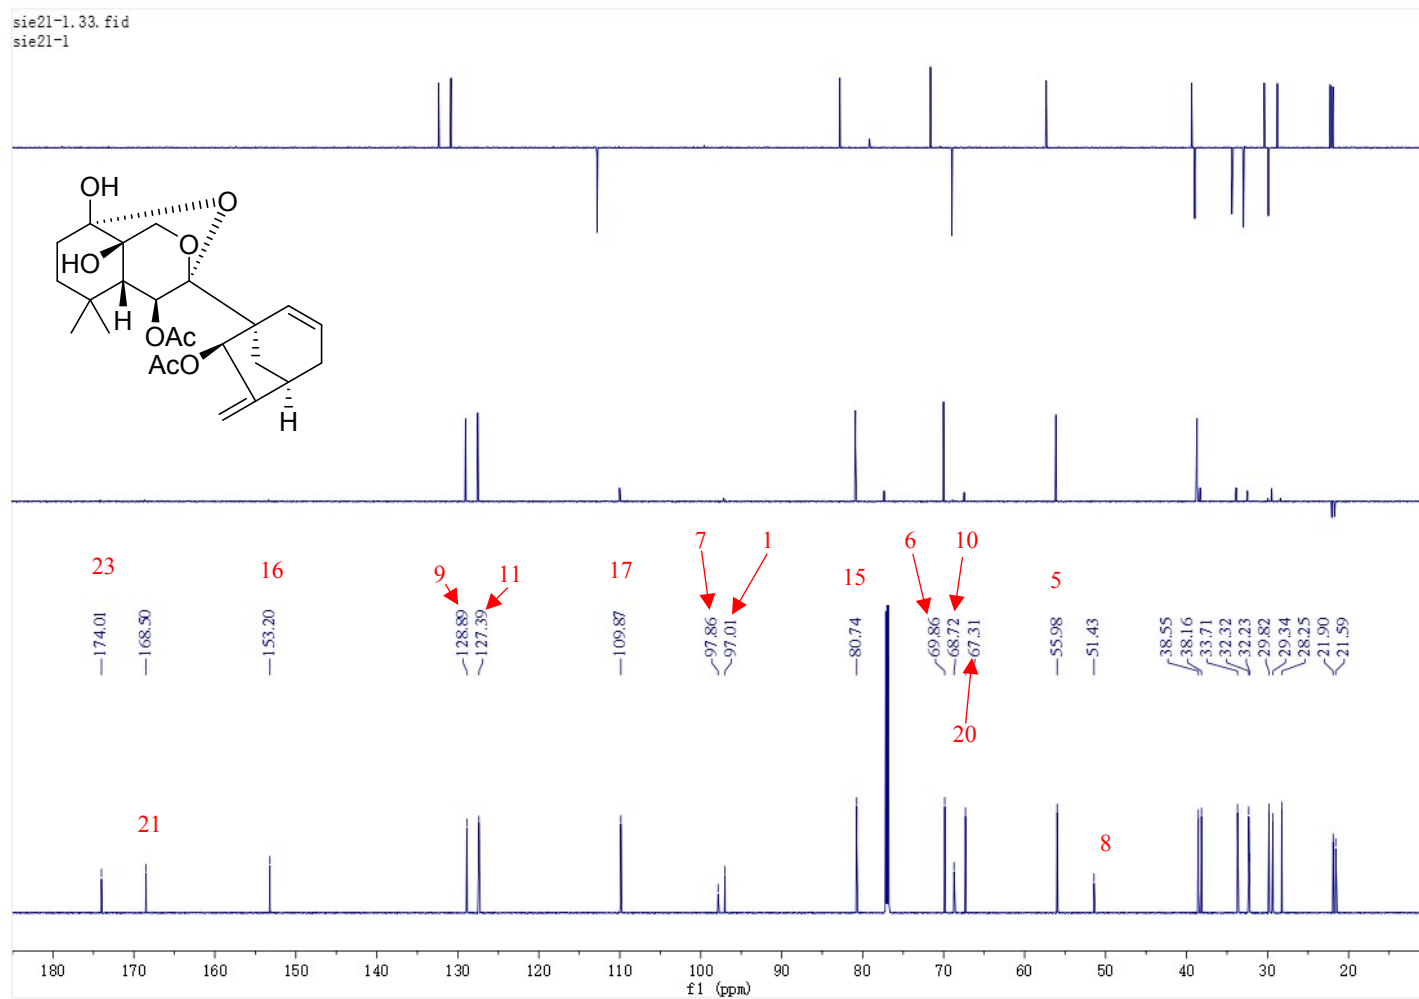

**Figure S74** <sup>13</sup>C NMR spectrum (CDCl<sub>3</sub>, 800MHz) of maericalysin D (4).

sie21-1.33.fid  
sie21-1

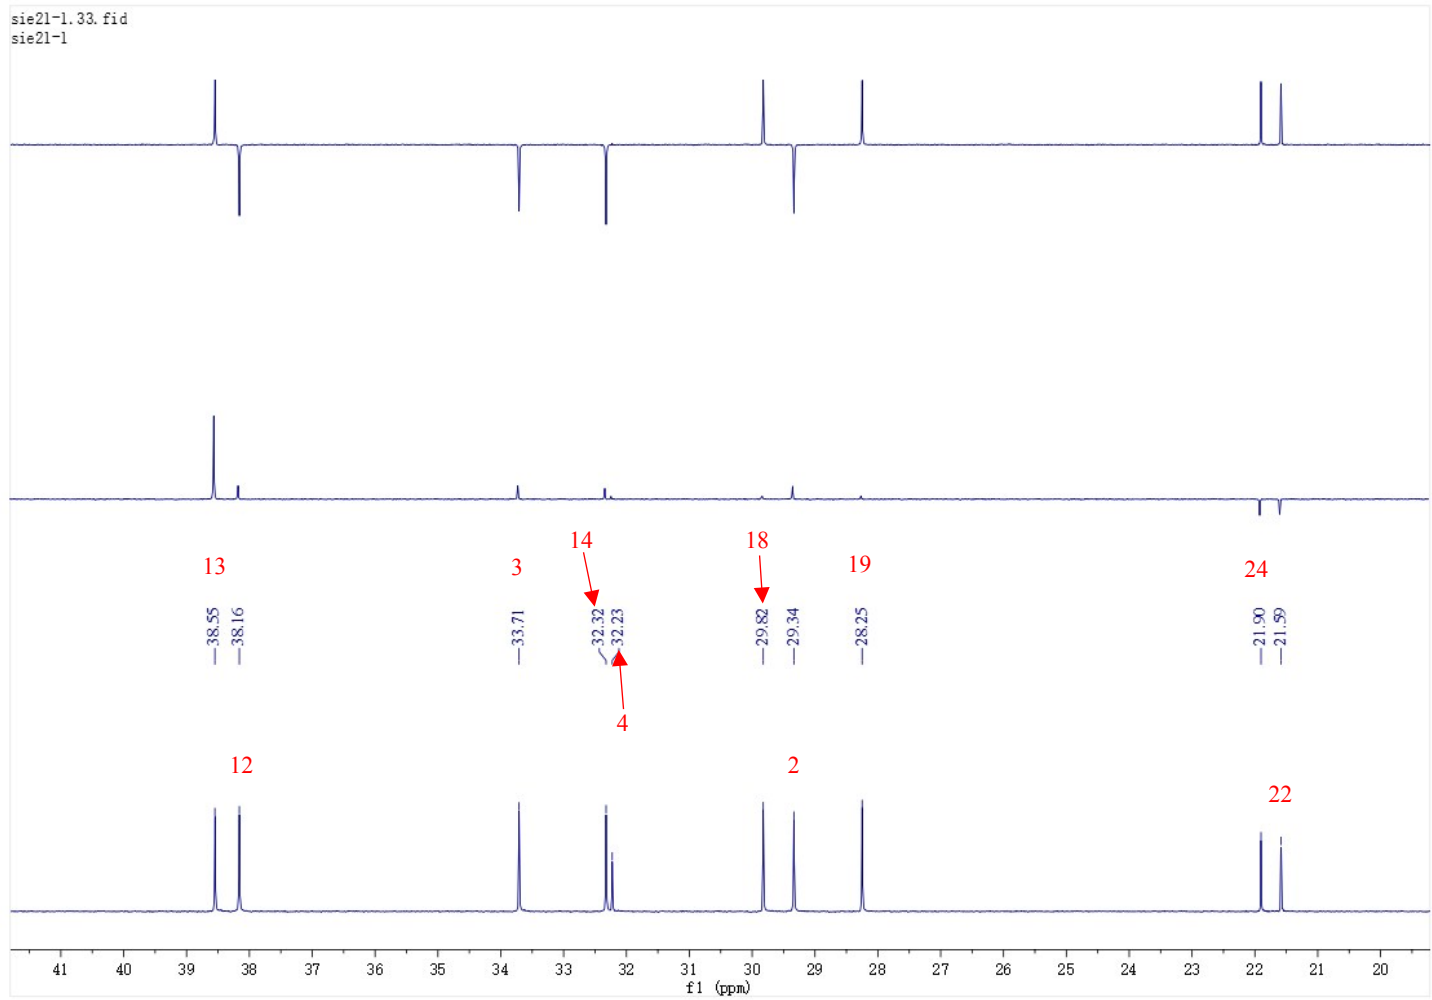

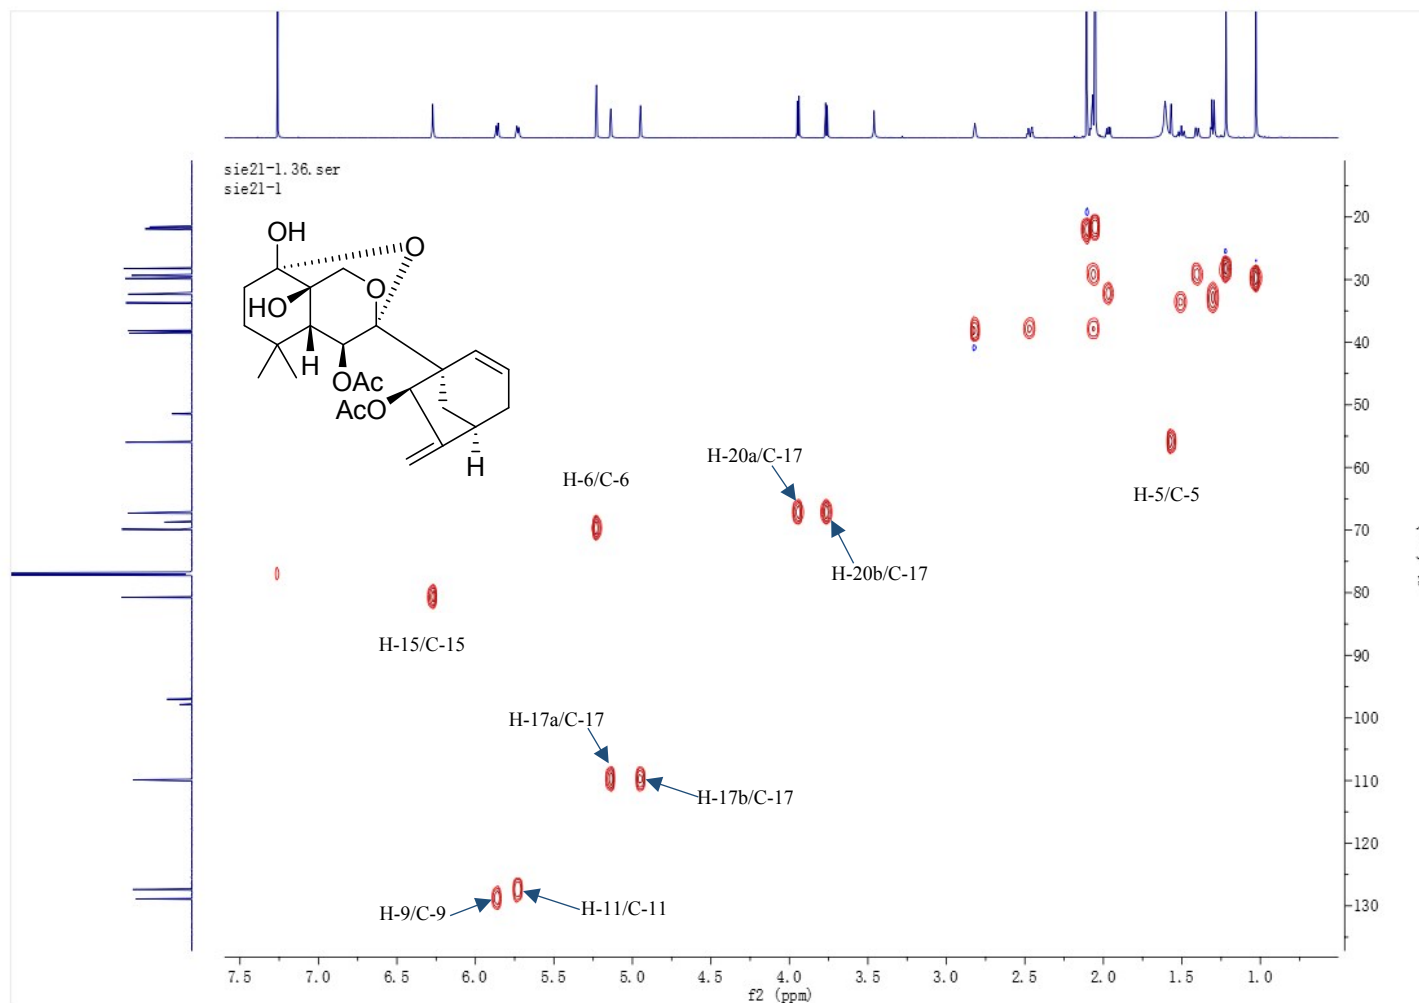

**Figure S75**  $^1\text{H}$ - $^1\text{H}$  COSY spectrum ( $\text{CDCl}_3$ , 800MHz) of maoericalysin D (**4**).

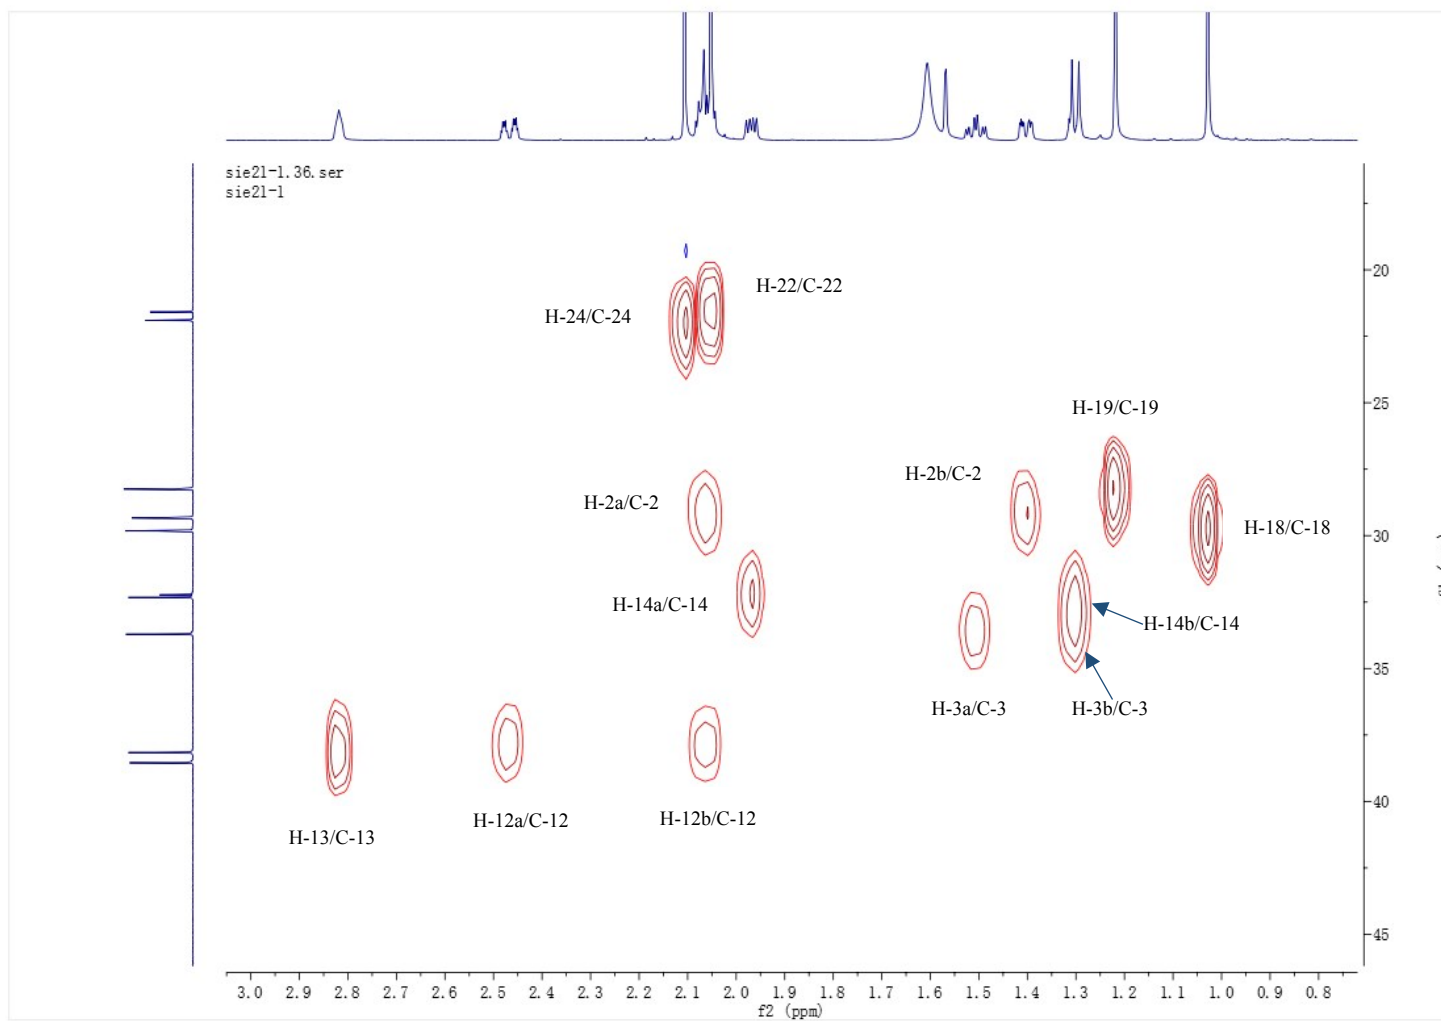

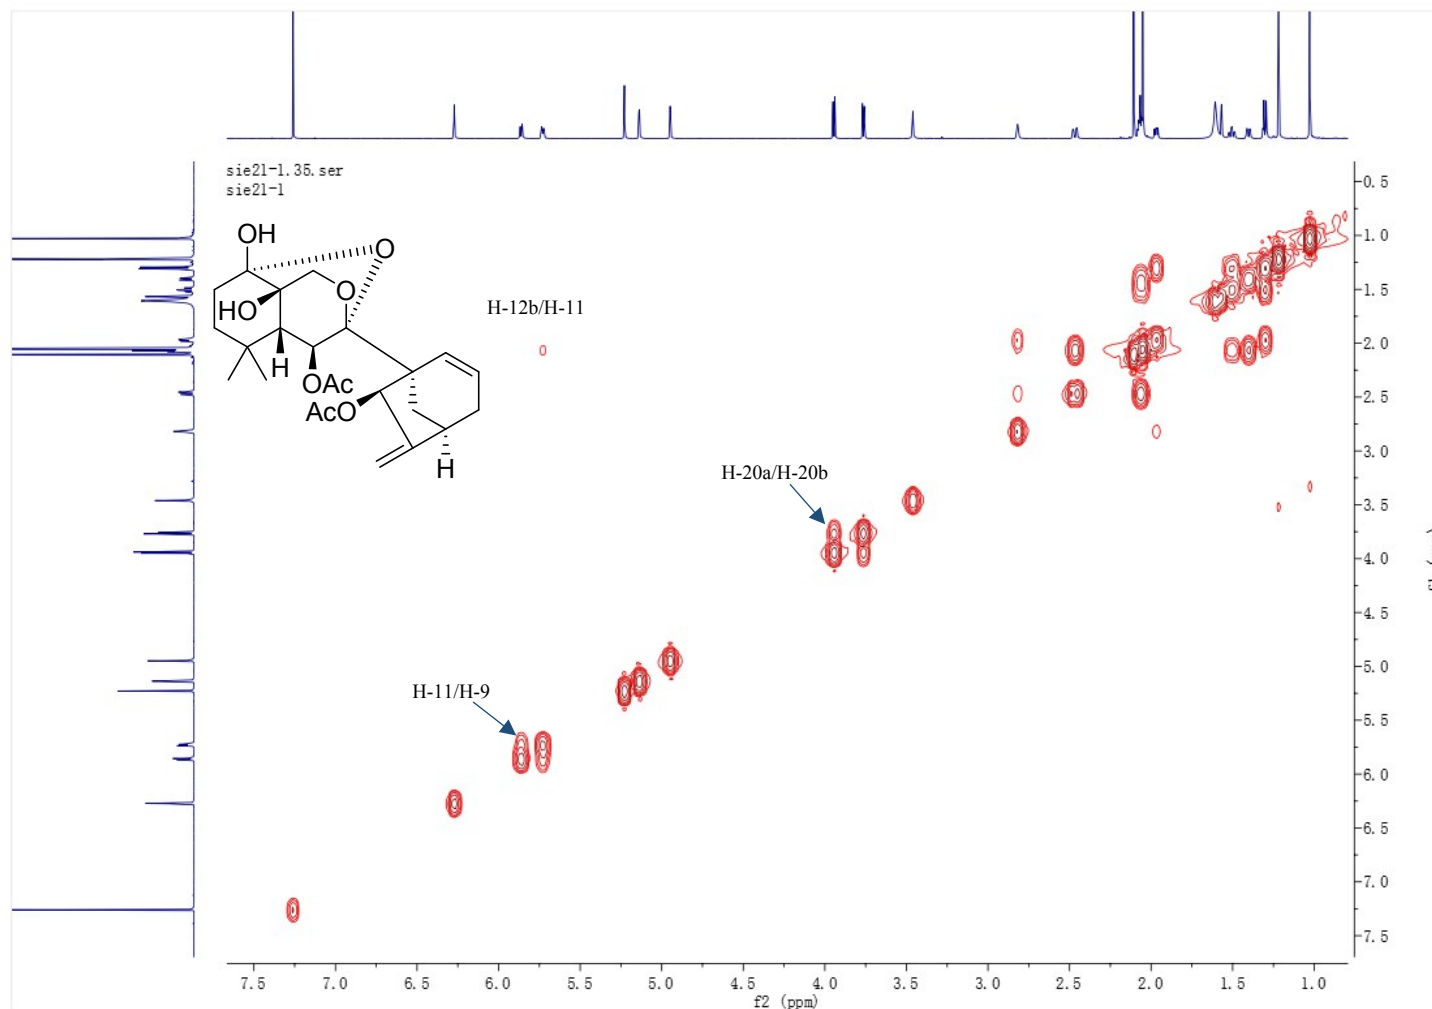

**Figure S76**  $^1\text{H}$ - $^1\text{H}$  COSY spectrum ( $\text{CDCl}_3$ , 800MHz) of maericalysin D (**4**).

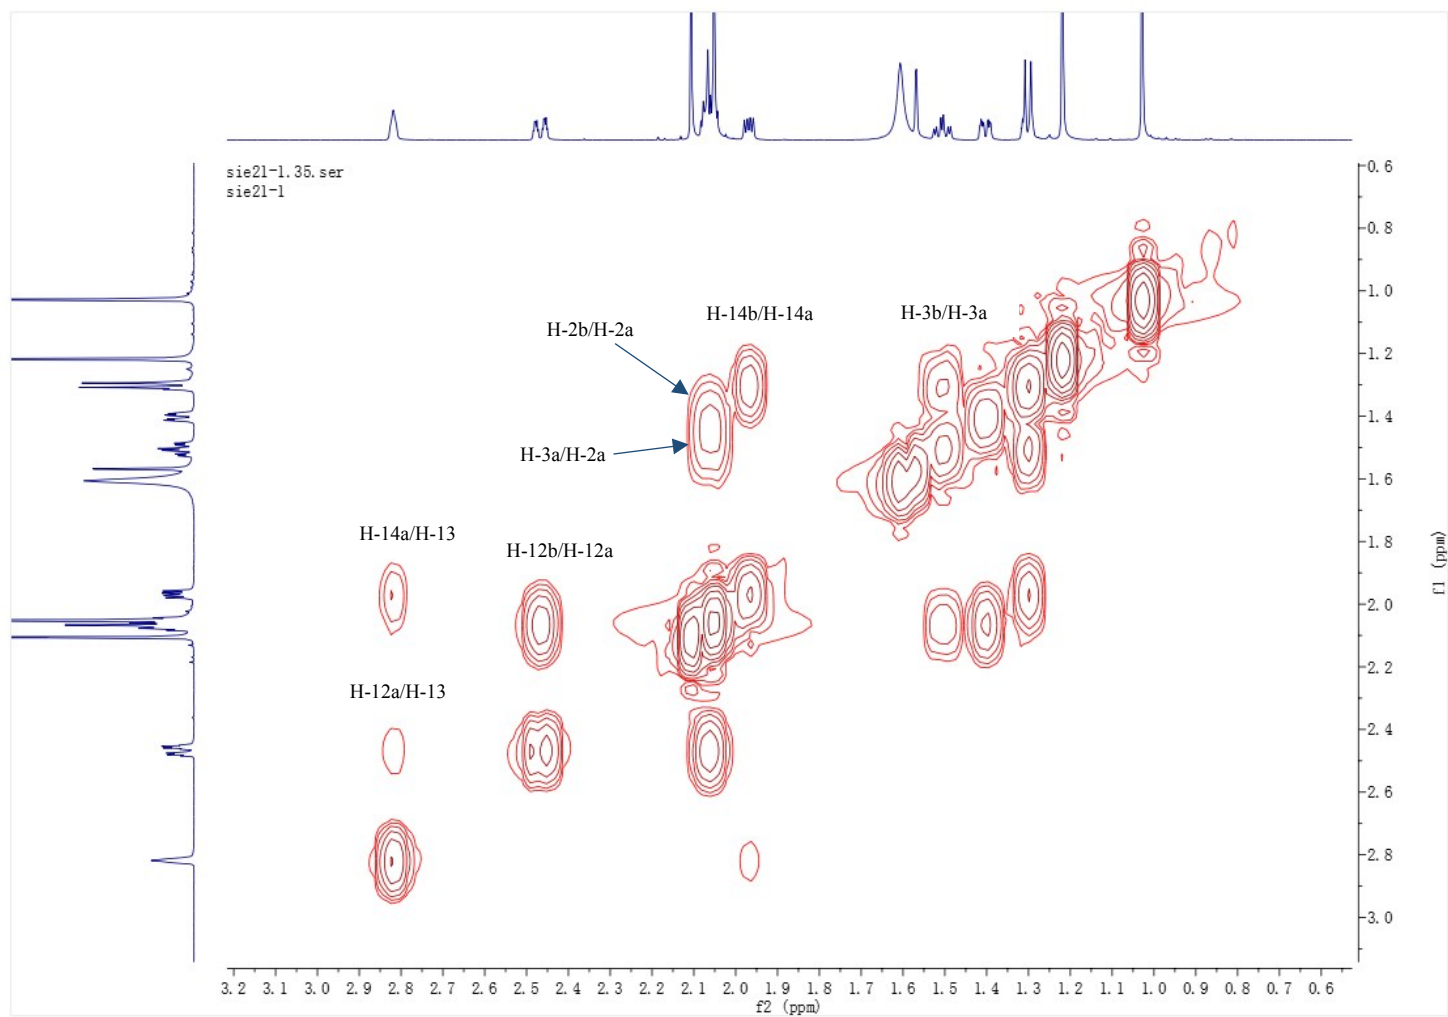



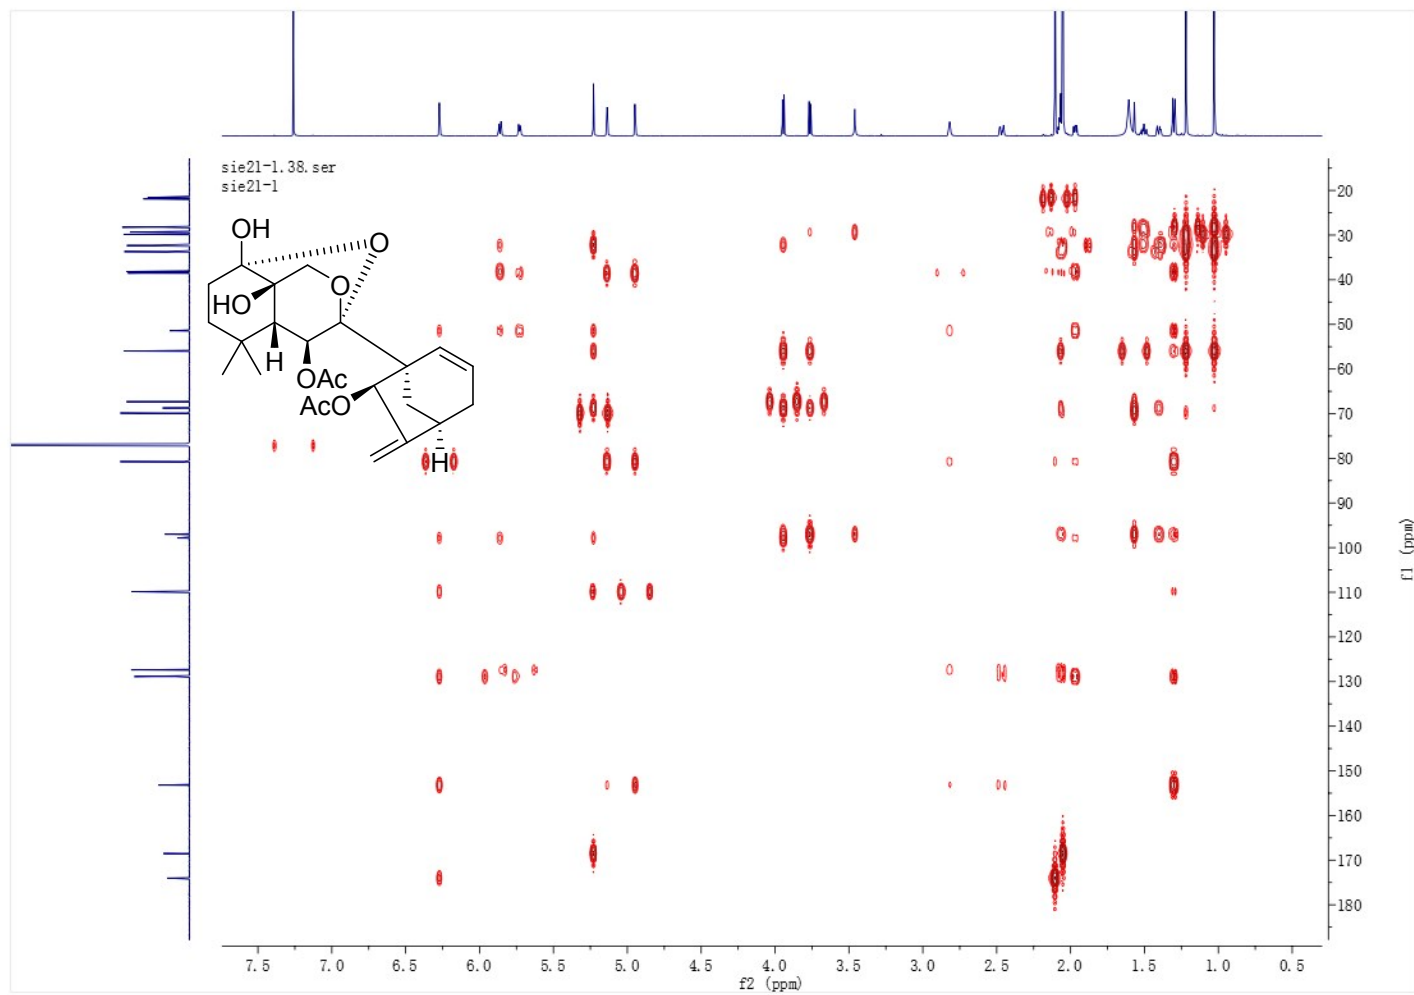

**Figure S77** HMBC spectrum (CDCl<sub>3</sub>, 800MHz) of maoericalysin D (**4**).

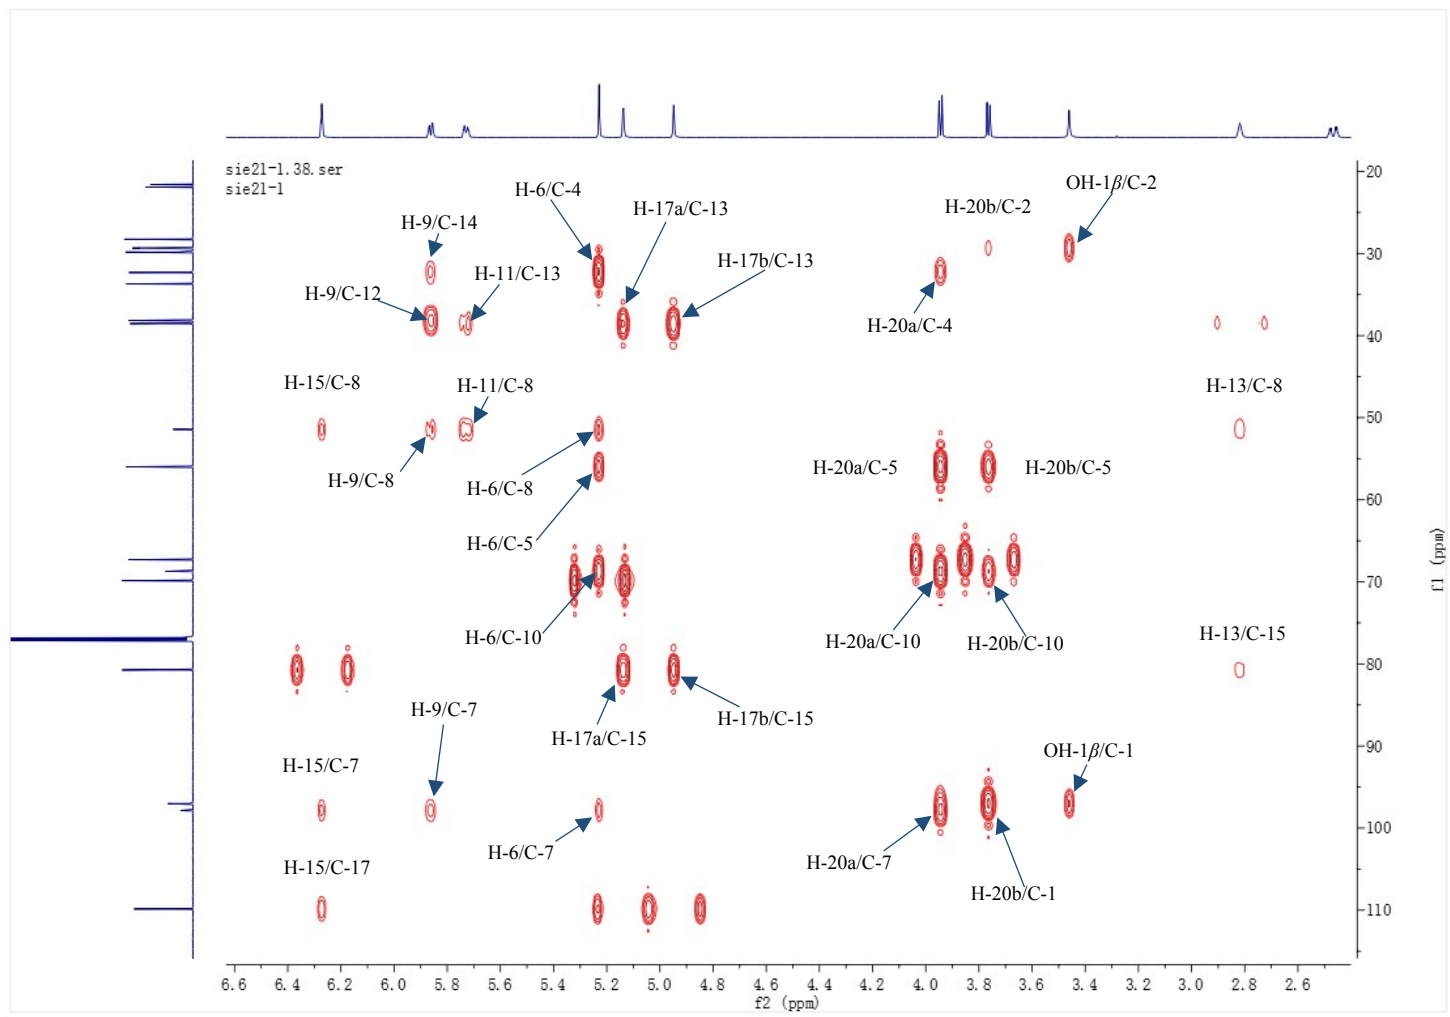

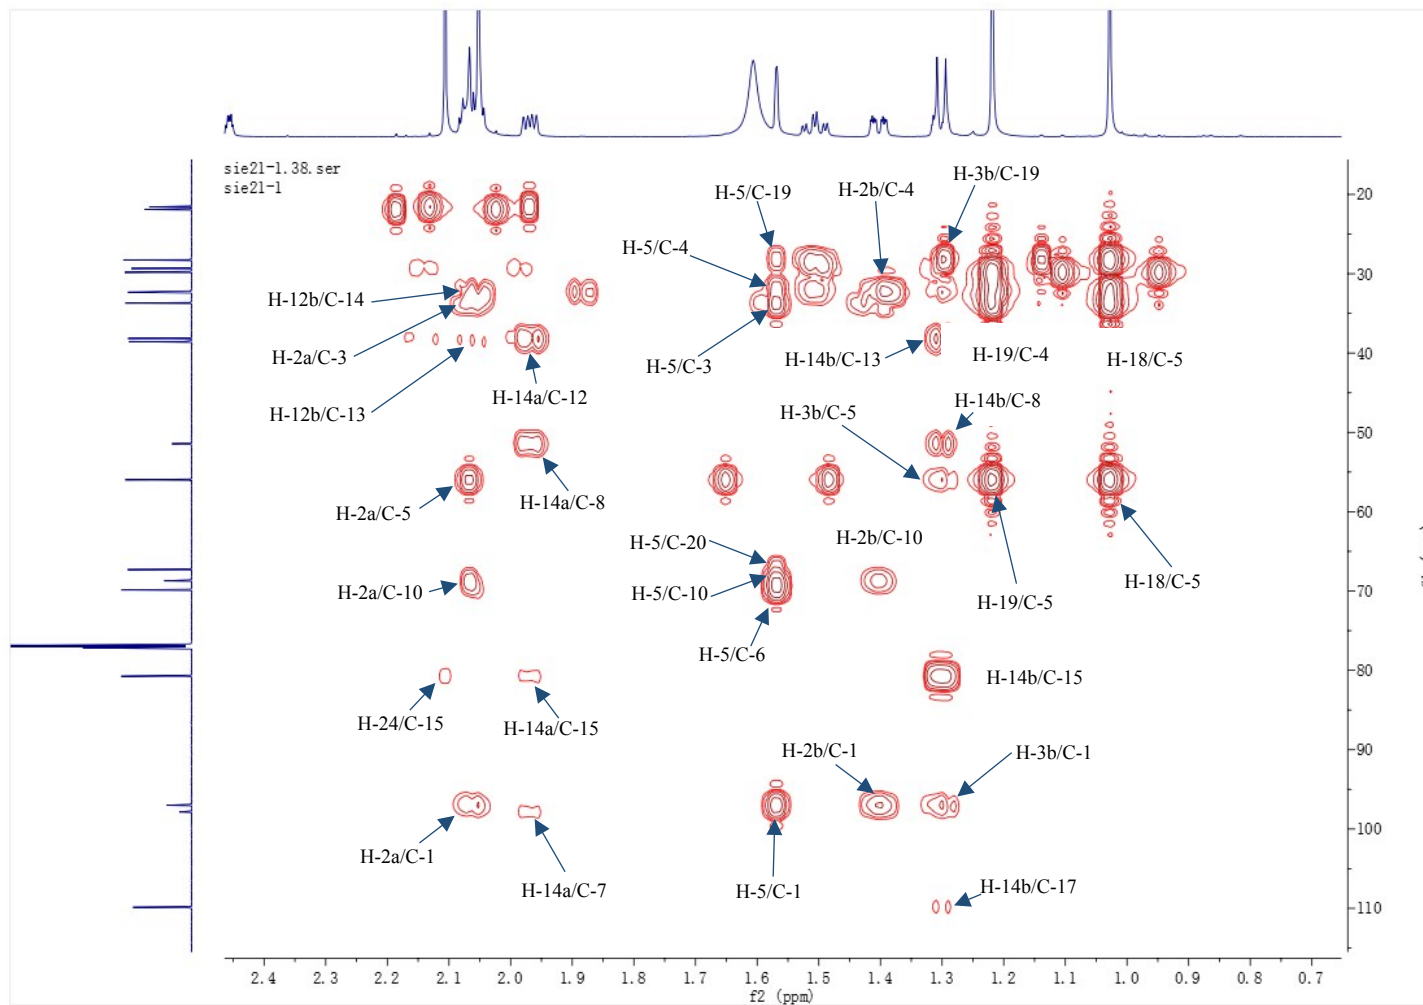

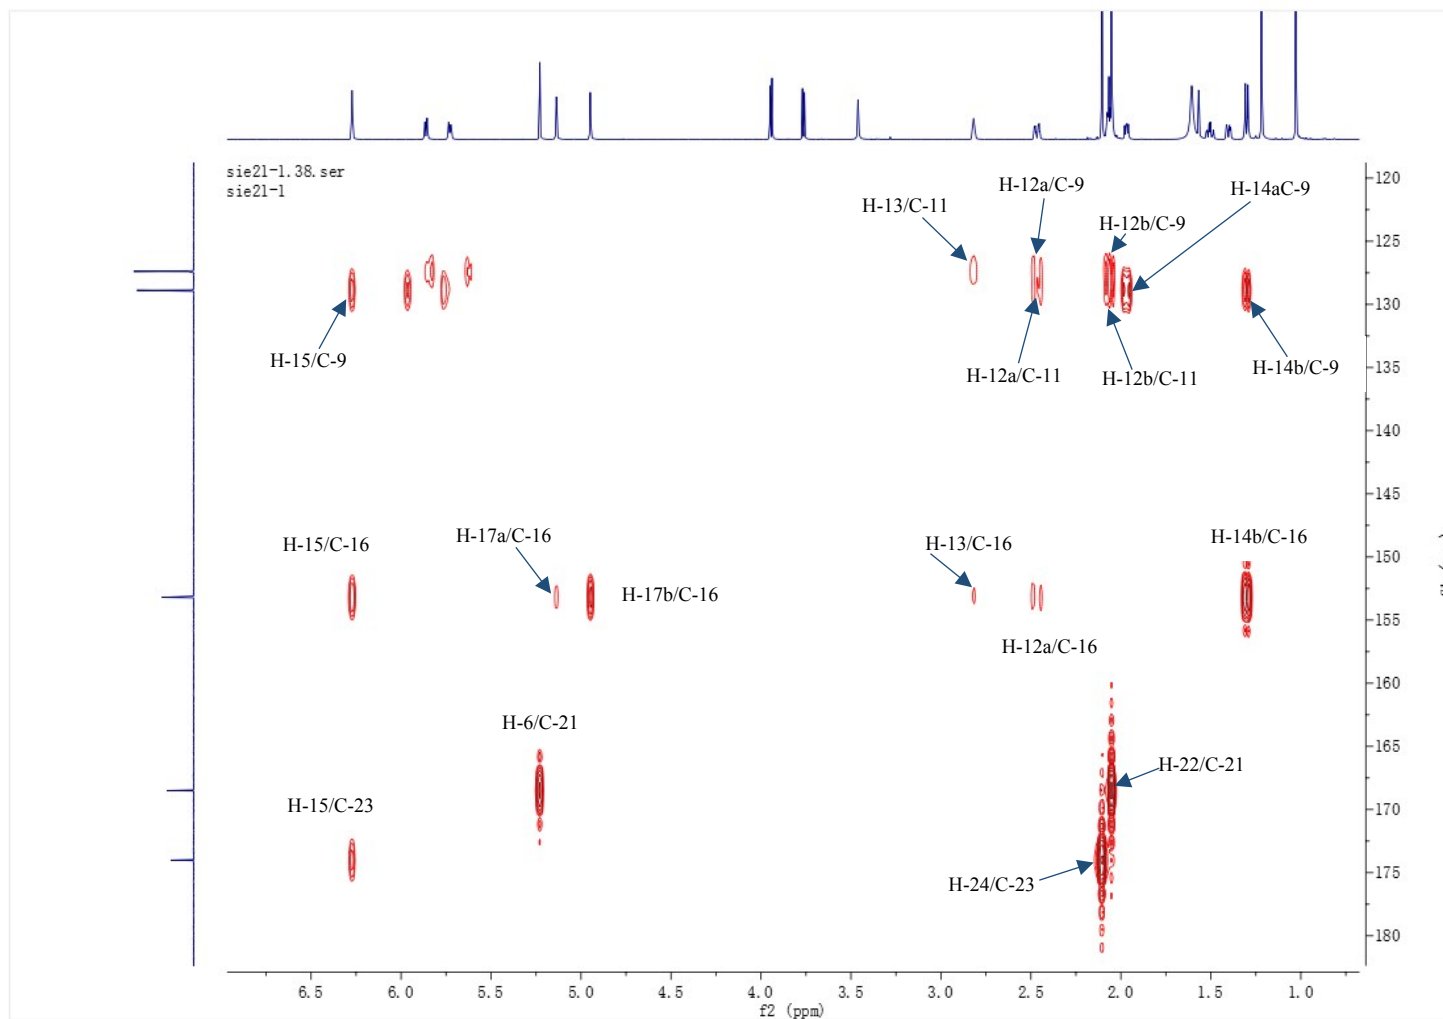

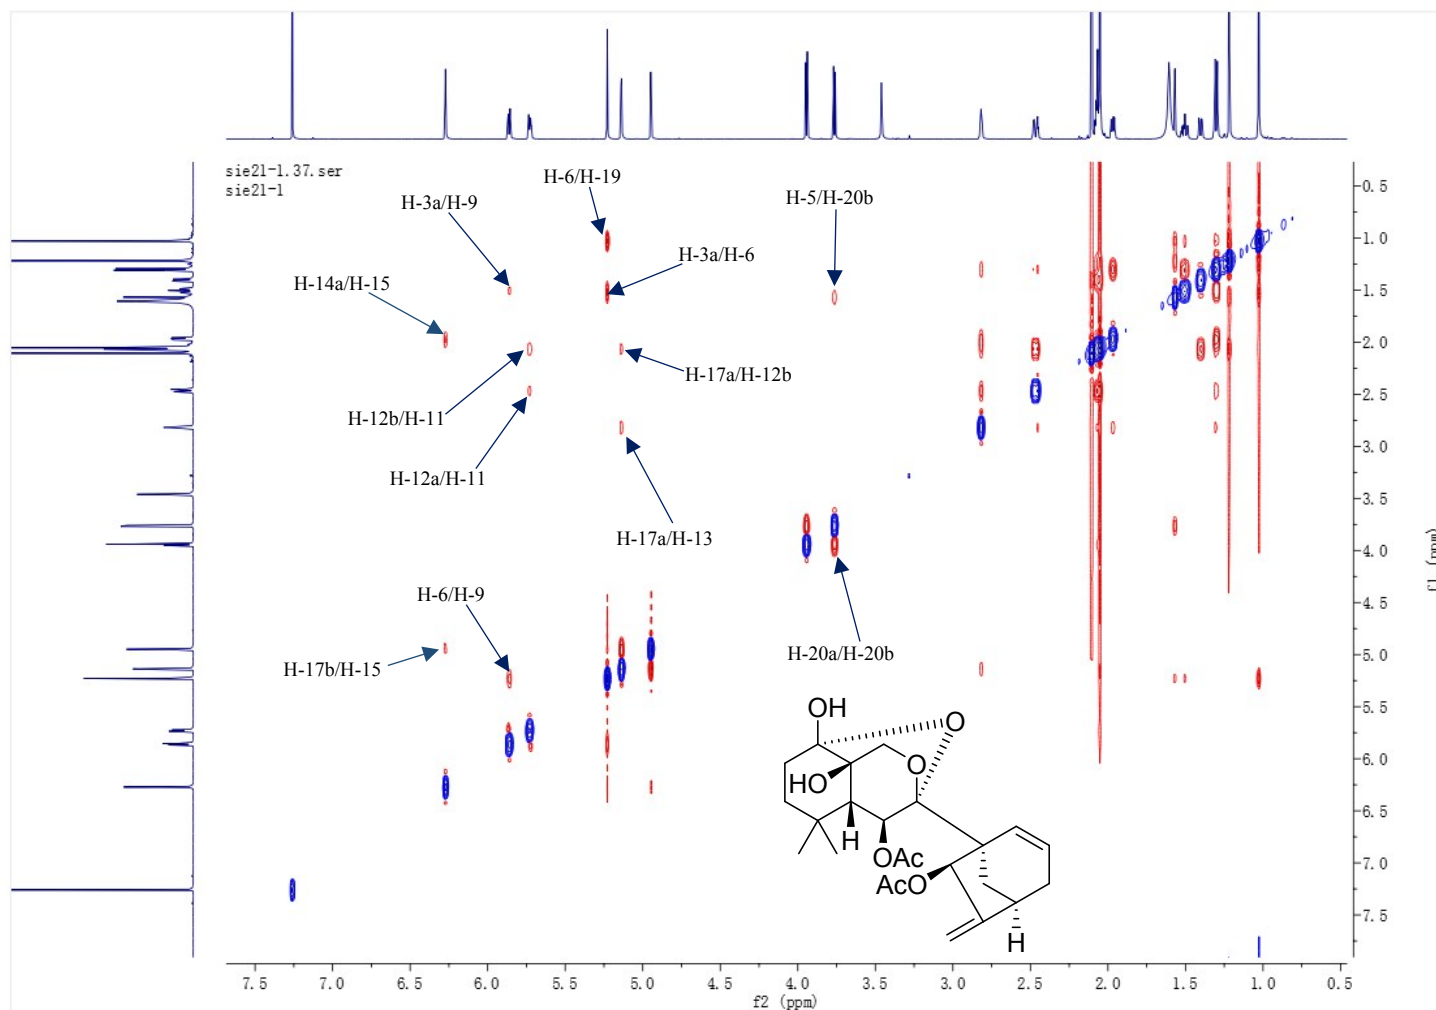

**Figure S78** ROESY spectrum ( $\text{CDCl}_3$ , 800MHz) of maericalysin D (**4**).

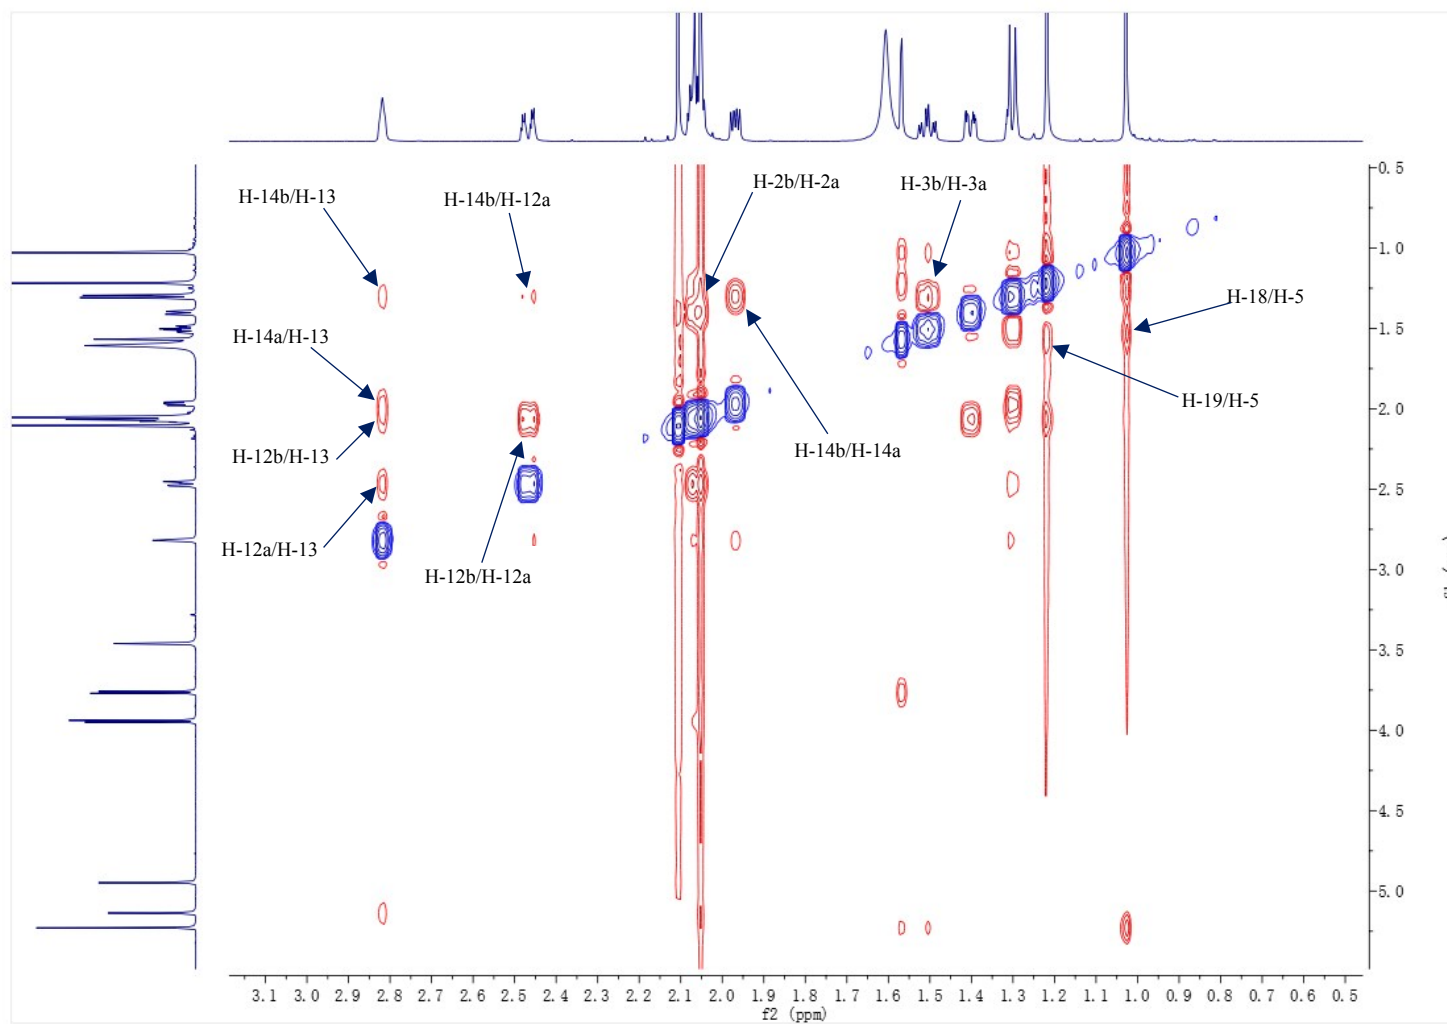

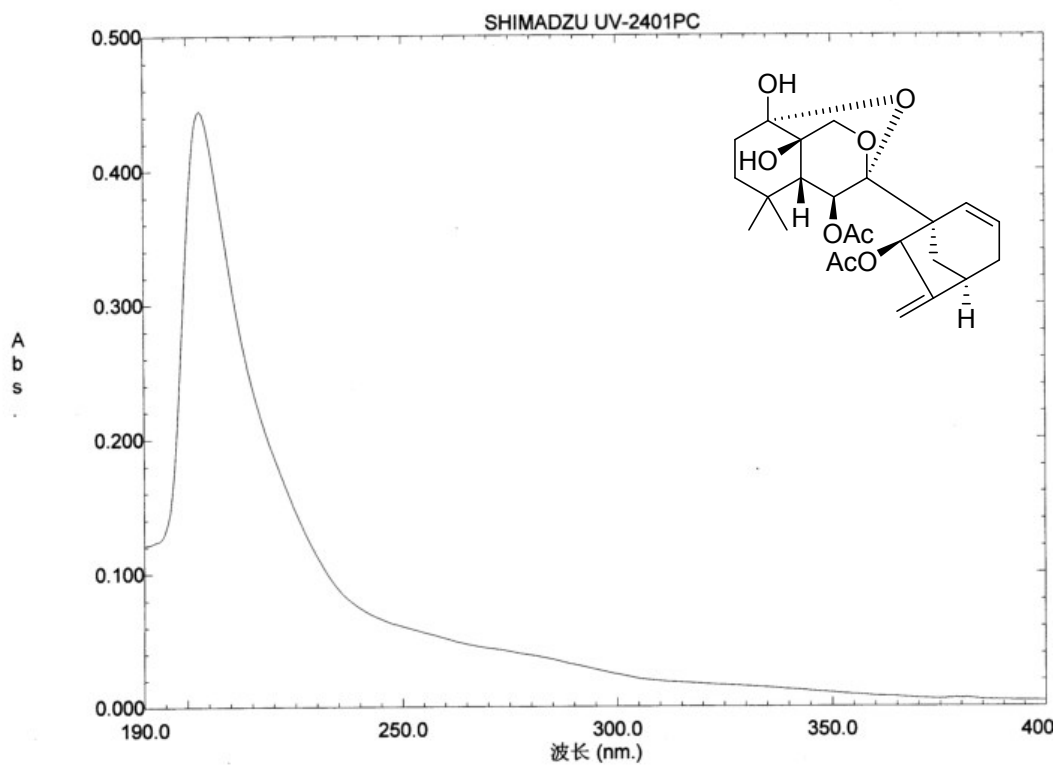

文件名: SIE-21-1

SIE-21-1

创建于: 09:45 17-06-21  
数据: 原始

样品浓度: 0.0572毫克/毫升  
溶剂: 甲醇

测量模式: Abs.  
扫描速度: 中速  
狭缝: 5.0  
采样间隔: 0.5

| 否. | 波长 (nm.) | Abs.   |
|----|----------|--------|
| 1  | 203.00   | 0.4446 |

Figure S79 UV spectrum of maeriocalysin D (4).

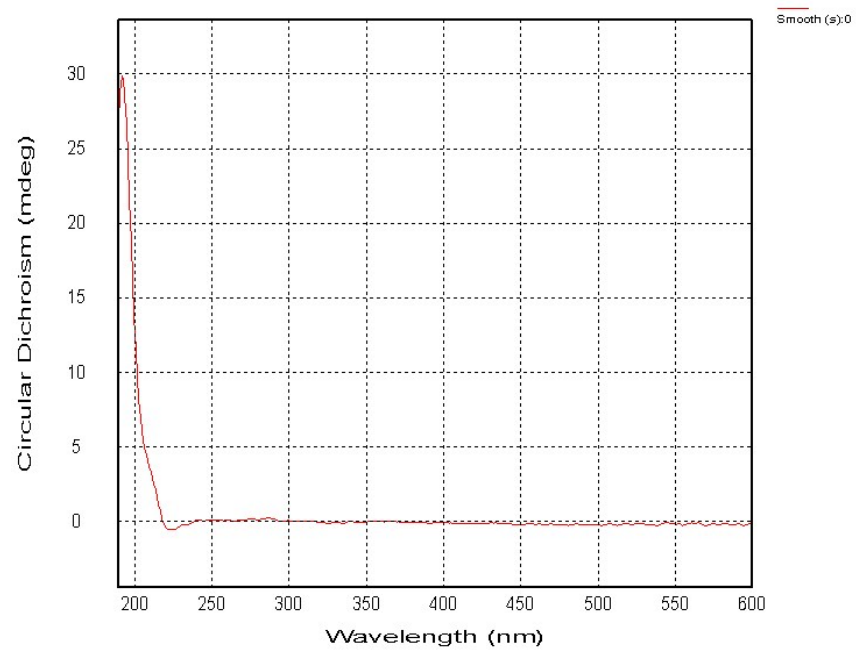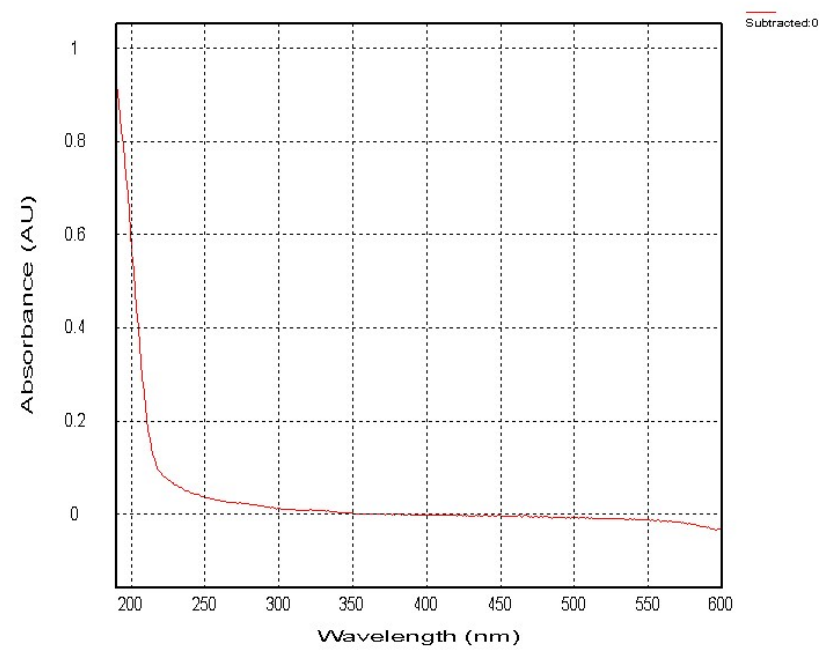

**Figure S80** CD spectrum of maericalysin D (4).



Optical rotation measurement

Model : P-1020 (A060460638)

| No.  | Sample   | Mode   | Data    | Monitor Blank    | Temp. Cell Temp Point | Date Comment Sample Name                                          | Light Filter Operator | Cycle Time Integ Time |
|------|----------|--------|---------|------------------|-----------------------|-------------------------------------------------------------------|-----------------------|-----------------------|
| No.1 | 28 (1/3) | Sp.Rot | 66.5600 | 0.0832<br>0.0000 | 27.6<br>50.00         | Thu Jun 21 14:43:22 2018<br>0.00250g/mL Acetonitrile<br>SIE-21-1A | Na<br>589nm           | 2 sec<br>2 sec        |
| No.2 | 28 (2/3) | Sp.Rot | 67.0400 | 0.0838<br>0.0000 | 27.6<br>50.00         | Thu Jun 21 14:43:28 2018<br>0.00250g/mL Acetonitrile<br>SIE-21-1A | Na<br>589nm           | 2 sec<br>2 sec        |
| No.3 | 28 (3/3) | Sp.Rot | 67.4400 | 0.0843<br>0.0000 | 27.6<br>50.00         | Thu Jun 21 14:43:33 2018<br>0.00250g/mL Acetonitrile<br>SIE-21-1A | Na<br>589nm           | 2 sec<br>2 sec        |

+67.0133°

Figure S81 OR spectrum of maericalysin D (4).
